# Supplementary material for: De Novo Transcriptome Assembly, Functional Annotation, and Transcriptome Dynamics Analyses Reveal Stress Tolerance Genes in Mangrove Tree (Bruguiera gymnorhiza)
Source: Int J Mol Sci. 2021 Sep 13;22(18):9874. doi: 10.3390/ijms22189874 (PMC8467813; doi:10.3390/ijms22189874)
Supplement: Supplementary file 1 [file ijms-22-09874-s001.zip › Supplementary_tables.xlsx]

## Sheet: Table_S1_raw reads
Table_S1_Summary of transcriptome sequencing data
Samples	number of reads	sum length (bp)	minimim length	average length	maximum length	N50	Q20(%)	Q30(%)	% GC
Oceanside_1_R1.fastq	113848386	16777511857	35	147.4	151	151	98.05	95.36	43
Oceanside_1_R2.fastq	113848386	16781946056	35	147.4	151	151	95.63	90.11	45
Oceanside_2_R1.fastq	41802998	6162376593	35	147.4	151	151	98.09	95.37	44
Oceanside_2_R2.fastq	41802998	6163602851	35	147.4	151	151	96.33	91.4	45
Oceanside_3_R1.fastq	108968493	16051402702	35	147.3	151	151	98.14	95.44	43
Oceanside_3_R2.fastq	108968493	16054725543	35	147.3	151	151	96.42	91.65	44
Oceanside_4_R1.fastq	52852728	7607594153	35	143.9	151	150	98.08	95.43	41
Oceanside_4_R2.fastq	52852728	7611717255	35	144	151	150	96.67	92.51	42
Oceanside_5_R1.fastq	70876615	10401962977	35	146.8	151	151	98.25	95.74	43
Oceanside_5_R2.fastq	70876615	10403958501	35	146.8	151	151	96.86	92.53	44
Riverside_1_R1.fastq	61427798	8964266937	35	145.9	151	151	98.24	95.75	44
Riverside_1_R2.fastq	61427798	8966719150	35	146	151	151	97.08	93.14	45
Riverside_2_R1.fastq	66680801	9655696568	35	144.8	151	151	98.18	95.59	43
Riverside_2_R2.fastq	66680801	9658722754	35	144.9	151	151	97.12	93.18	45
Riverside_3_R1.fastq	87204511	12785863804	35	146.6	151	151	98.17	95.48	44
Riverside_3_R2.fastq	87204511	12788208000	35	146.6	151	151	96.87	92.57	45
Riverside_4_R1.fastq	76050668	11227004726	35	147.6	151	151	97.96	95.03	43
Riverside_4_R2.fastq	76050668	11228928048	35	147.7	151	151	96.62	91.96	45
Sum	1359425996	199292208475

## Sheet: Table_S2_After trimming
Table_S2_Summary of transcriptome sequencing data after trimming
Samples	number of reads	sum length (bp)	minimim length	average length	maximum length	N50	Q20(%)	Q30(%)	% GC
Oceanside_1_R1.fastq	104970390	15090385191	36	143.8	151	150	99.43	97.85	43
Oceanside_1_R2.fastq	104970390	14665727144	36	139.7	151	150	98.97	95.65	45
Oceanside_2_R1.fastq	39047914	5596955304	36	143.3	151	150	99.42	97.81	44
Oceanside_2_R2.fastq	39047914	5486624895	36	140.5	151	150	99.09	96.07	45
Oceanside_3_R1.fastq	101780053	14566825024	36	143.1	151	150	99.42	97.82	43
Oceanside_3_R2.fastq	101780053	14309243847	36	140.6	151	150	99.14	96.25	44
Oceanside_4_R1.fastq	48332390	6771033074	36	140.1	151	150	99.46	97.92	41
Oceanside_4_R2.fastq	48332390	6706892164	36	138.8	151	150	99.33	96.97	42
Oceanside_5_R1.fastq	66650076	9539063598	36	143.1	151	150	99.47	97.97	43
Oceanside_5_R2.fastq	66650076	9394614772	36	141	151	150	99.23	96.55	44
Riverside_1_R1.fastq	57937387	8255480175	36	142.5	151	150	99.48	97.98	44
Riverside_1_R2.fastq	57937387	8167663631	36	141	151	150	99.32	96.89	45
Riverside_2_R1.fastq	62715105	8853224883	36	141.2	151	150	99.46	97.9	43
Riverside_2_R2.fastq	62715105	8772080927	36	139.9	151	150	99.32	96.91	45
Riverside_3_R1.fastq	82292142	11746198111	36	142.7	151	150	99.43	97.77	44
Riverside_3_R2.fastq	82292142	11607986747	36	141.1	151	150	99.23	96.56	45
Riverside_4_R1.fastq	71344647	10223142885	36	143.3	151	150	99.39	97.59	43
Riverside_4_R2.fastq	71344647	10085565438	36	141.4	151	150	99.17	96.29	45
Sum	1270140208	179838707810

## Sheet: Table_S3_assembly stats
Table_S3_Summary of transcriptome assembly quality
Assembly	number of reads	sum length (bp)	minimim length	average length	maximum length	N50
Trinity_all_transcripts.fasta	254892	254835340	241	999.8	14969	1613
Trinity_transcripts_longer_than_300bp.fasta	218920	245195506	300	1120	14969	1680
Trinity_transcripts_longer_than_300bp_clustered_95.fasta	132268	152058362	300	1149.6	14969	1786

## Sheet: Table_S4_mappingRate
Table_S4_Percentage of reads mapped back to B. gymnorhiza transcriptome. S1-S5: Oceanside samples; S6-S9: Riverside samples
Samples	Reads aligned 1 time (%)	Reads aligned >1 times (%)	Overall alignment rate (%)
S1	40.85	54.04	98.59
S2	40.58	54.84	98.52
S3	37.69	57.81	98.58
S4	37.58	57.86	98.48
S5	37.42	57.87	98.48
S6	38.31	57.46	98.71
S7	38.24	57.44	98.7
S8	37.98	57.72	98.78
S9	38.44	57.08	98.67
Average	38.5656	56.9022	98.6122

## Sheet: Table_S5_busco
Table_S5_ Summarized benchmarking in BUSCO notation for B. gymnorhiza transcriptome assembly
Complete BUSCOs	1324 (91.9%)
Complete and single-copy BUSCOs	710 (49.3%)
Complete and duplicated BUSCOs	614 (42.6%)
Fragmented BUSCOs	51 (3.5%)
Missing BUSCOs	65 (4.6%)
Total BUSCO groups searched	1440

## Sheet: Table_S6_functional_annotation
Table_S6_Overview of functional annotation by homology
Category	No. of transcripts
Predicted ORFs	109506
Predicted proteins	76565
sprot_Top_BLASTX_hit	94455
sprot_Top_BLASTP_hit	62285
Pfam	40303
SignalP	2900

## Sheet: Table_S7_Trinnotate_annot
Table_S7_Full annotation table of the whole transcriptome
#gene_id	transcript_id	sprot_Top_BLASTX_hit	RNAMMER	prot_id	prot_coords	sprot_Top_BLASTP_hit	Pfam	SignalP	TmHMM	eggnog	Kegg	gene_ontology_blast	gene_ontology_pfam	transcript	peptide
TRINITY_DN108828_c0_g1	TRINITY_DN108828_c0_g1_i1	HIP1_ORYSJ^HIP1_ORYSJ^Q:5-145,H:615-661^59.574%ID^E:1.72e-16^RecName: Full=Probable E3 ubiquitin-protein ligase HIP1;^Eukaryota; Viridiplantae; Streptophyta; Embryophyta; Tracheophyta; Spermatophyta; Magnoliophyta; Liliopsida; Poales; Poaceae; BOP clade; Oryzoideae; Oryzeae; Oryzinae; Oryza; Oryza sativa	.	.	.	.	.	.	.	ENOG41121N2^zinc ion binding	KEGG:osa:9272591	GO:0046872^molecular_function^metal ion binding`GO:0061630^molecular_function^ubiquitin protein ligase activity`GO:0043161^biological_process^proteasome-mediated ubiquitin-dependent protein catabolic process`GO:0040008^biological_process^regulation of growth	.	.	.
TRINITY_DN108801_c0_g2	TRINITY_DN108801_c0_g2_i1	HSP21_PEA^HSP21_PEA^Q:247-5,H:1-81^74.074%ID^E:1.33e-37^RecName: Full=17.1 kDa class II heat shock protein;^Eukaryota; Viridiplantae; Streptophyta; Embryophyta; Tracheophyta; Spermatophyta; Magnoliophyta; eudicotyledons; Gunneridae; Pentapetalae; rosids; fabids; Fabales; Fabaceae; Papilionoideae; Fabeae; Pisum	.	.	.	.	.	.	.	.	.	GO:0005737^cellular_component^cytoplasm	.	.	.
TRINITY_DN108835_c0_g1	TRINITY_DN108835_c0_g1_i1	PEPR1_ARATH^PEPR1_ARATH^Q:381-1,H:414-540^54.331%ID^E:1.1e-37^RecName: Full=Leucine-rich repeat receptor-like protein kinase PEPR1;^Eukaryota; Viridiplantae; Streptophyta; Embryophyta; Tracheophyta; Spermatophyta; Magnoliophyta; eudicotyledons; Gunneridae; Pentapetalae; rosids; malvids; Brassicales; Brassicaceae; Camelineae; Arabidopsis`PEPR1_ARATH^PEPR1_ARATH^Q:381-52,H:267-380^41.228%ID^E:5.47e…	.	TRINITY_DN108835_c0_g1_i1|m.1	381-1[-]	PEPR1_ARATH^PEPR1_ARATH^Q:1-127,H:414-540^54.331%ID^E:9.87e-38^RecName: Full=Leucine-rich repeat receptor-like protein kinase PEPR1;^Eukaryota; Viridiplantae; Streptophyta; Embryophyta; Tracheophyta; Spermatophyta; Magnoliophyta; eudicotyledons; Gunneridae; Pentapetalae; rosids; malvids; Brassicales; Brassicaceae; Camelineae; Arabidopsis`PEPR1_ARATH^PEPR1_ARATH^Q:1-110,H:267-380^41.228%ID^E:4.93e…	PF00560.32^LRR_1^Leucine Rich Repeat^48-68^E:0.94`PF13516.5^LRR_6^Leucine Rich repeat^92-107^E:0.36`PF00560.32^LRR_1^Leucine Rich Repeat^94-116^E:0.11	.	.	COG0515^Serine Threonine protein kinase`COG4886^leucine Rich Repeat	KEGG:ath:AT1G73080	GO:0016021^cellular_component^integral component of membrane`GO:0005886^cellular_component^plasma membrane`GO:0009506^cellular_component^plasmodesma`GO:0005524^molecular_function^ATP binding`GO:0004383^molecular_function^guanylate cyclase activity`GO:0001653^molecular_function^peptide receptor activity`GO:0004674^molecular_function^protein serine/threonine kinase activity`GO:0006955^biological_pr…	GO:0005515^molecular_function^protein binding	.	.
TRINITY_DN108832_c0_g1	TRINITY_DN108832_c0_g1_i1	.	.	.	.	.	.	.	.	.	.	.	.	.	.
TRINITY_DN108831_c0_g1	TRINITY_DN108831_c0_g1_i1	.	.	TRINITY_DN108831_c0_g1_i1|m.2	1-339[+]	.	.	.	.	.	.	.	.	.	.
TRINITY_DN108831_c0_g1	TRINITY_DN108831_c0_g1_i1	.	.	TRINITY_DN108831_c0_g1_i1|m.3	338-3[-]	.	.	.	.	.	.	.	.	.	.
TRINITY_DN108812_c0_g1	TRINITY_DN108812_c0_g1_i1	.	.	.	.	.	.	.	.	.	.	.	.	.	.
TRINITY_DN108840_c0_g1	TRINITY_DN108840_c0_g1_i1	COV1_ARATH^COV1_ARATH^Q:513-587,H:72-96^88%ID^E:3.62e-06^RecName: Full=Protein CONTINUOUS VASCULAR RING 1 {ECO:0000303|PubMed:12668628};^Eukaryota; Viridiplantae; Streptophyta; Embryophyta; Tracheophyta; Spermatophyta; Magnoliophyta; eudicotyledons; Gunneridae; Pentapetalae; rosids; malvids; Brassicales; Brassicaceae; Camelineae; Arabidopsis	.	.	.	.	.	.	.	COG2928^conserved protein	KEGG:ath:AT2G20120	GO:0005794^cellular_component^Golgi apparatus`GO:0016021^cellular_component^integral component of membrane`GO:0010222^biological_process^stem vascular tissue pattern formation	.	.	.
TRINITY_DN108900_c0_g1	TRINITY_DN108900_c0_g1_i1	OST48_ARATH^OST48_ARATH^Q:536-616,H:267-293^88.889%ID^E:1.37e-08^RecName: Full=Dolichyl-diphosphooligosaccharide--protein glycosyltransferase 48 kDa subunit;^Eukaryota; Viridiplantae; Streptophyta; Embryophyta; Tracheophyta; Spermatophyta; Magnoliophyta; eudicotyledons; Gunneridae; Pentapetalae; rosids; malvids; Brassicales; Brassicaceae; Camelineae; Arabidopsis	.	.	.	.	.	.	.	ENOG410XSF3^Dolichyl-diphosphooligosaccharide--protein glycosyltransferase	KEGG:ath:AT5G66680`KO:K12670	GO:0005783^cellular_component^endoplasmic reticulum`GO:0005794^cellular_component^Golgi apparatus`GO:0016021^cellular_component^integral component of membrane`GO:0016020^cellular_component^membrane`GO:0005730^cellular_component^nucleolus`GO:0008250^cellular_component^oligosaccharyltransferase complex`GO:0009505^cellular_component^plant-type cell wall`GO:0009506^cellular_component^plasmodesma`GO:0…	.	.	.
TRINITY_DN108804_c0_g1	TRINITY_DN108804_c0_g1_i1	.	.	.	.	.	.	.	.	.	.	.	.	.	.
TRINITY_DN108880_c0_g1	TRINITY_DN108880_c0_g1_i1	.	.	.	.	.	.	.	.	.	.	.	.	.	.
TRINITY_DN108823_c0_g1	TRINITY_DN108823_c0_g1_i1	TAD2B_ARATH^TAD2B_ARATH^Q:2-541,H:189-355^61.111%ID^E:1.67e-57^RecName: Full=Transcriptional adapter ADA2b;^Eukaryota; Viridiplantae; Streptophyta; Embryophyta; Tracheophyta; Spermatophyta; Magnoliophyta; eudicotyledons; Gunneridae; Pentapetalae; rosids; malvids; Brassicales; Brassicaceae; Camelineae; Arabidopsis	.	TRINITY_DN108823_c0_g1_i1|m.4	2-544[+]	TAD2B_ARATH^TAD2B_ARATH^Q:1-180,H:189-355^61.111%ID^E:6.22e-67^RecName: Full=Transcriptional adapter ADA2b;^Eukaryota; Viridiplantae; Streptophyta; Embryophyta; Tracheophyta; Spermatophyta; Magnoliophyta; eudicotyledons; Gunneridae; Pentapetalae; rosids; malvids; Brassicales; Brassicaceae; Camelineae; Arabidopsis	.	.	.	COG5114^transcriptional	KEGG:ath:AT4G16420`KO:K11314	GO:0005634^cellular_component^nucleus`GO:0003682^molecular_function^chromatin binding`GO:0003677^molecular_function^DNA binding`GO:0003713^molecular_function^transcription coactivator activity`GO:0003700^molecular_function^DNA binding transcription factor activity`GO:0008270^molecular_function^zinc ion binding`GO:0006338^biological_process^chromatin remodeling`GO:0009631^biological_process^cold a…	.	.	.
TRINITY_DN108823_c0_g2	TRINITY_DN108823_c0_g2_i1	TAD2B_ARATH^TAD2B_ARATH^Q:97-558,H:203-355^66.234%ID^E:3.18e-55^RecName: Full=Transcriptional adapter ADA2b;^Eukaryota; Viridiplantae; Streptophyta; Embryophyta; Tracheophyta; Spermatophyta; Magnoliophyta; eudicotyledons; Gunneridae; Pentapetalae; rosids; malvids; Brassicales; Brassicaceae; Camelineae; Arabidopsis	.	TRINITY_DN108823_c0_g2_i1|m.5	115-561[+]	TAD2B_ARATH^TAD2B_ARATH^Q:1-148,H:209-355^67.568%ID^E:2.49e-64^RecName: Full=Transcriptional adapter ADA2b;^Eukaryota; Viridiplantae; Streptophyta; Embryophyta; Tracheophyta; Spermatophyta; Magnoliophyta; eudicotyledons; Gunneridae; Pentapetalae; rosids; malvids; Brassicales; Brassicaceae; Camelineae; Arabidopsis	.	.	.	COG5114^transcriptional	KEGG:ath:AT4G16420`KO:K11314	GO:0005634^cellular_component^nucleus`GO:0003682^molecular_function^chromatin binding`GO:0003677^molecular_function^DNA binding`GO:0003713^molecular_function^transcription coactivator activity`GO:0003700^molecular_function^DNA binding transcription factor activity`GO:0008270^molecular_function^zinc ion binding`GO:0006338^biological_process^chromatin remodeling`GO:0009631^biological_process^cold a…	.	.	.
TRINITY_DN108852_c0_g1	TRINITY_DN108852_c0_g1_i1	.	.	.	.	.	.	.	.	.	.	.	.	.	.
TRINITY_DN108890_c0_g1	TRINITY_DN108890_c0_g1_i1	.	.	.	.	.	.	.	.	.	.	.	.	.	.
TRINITY_DN108857_c0_g1	TRINITY_DN108857_c0_g1_i1	NAC8_ARATH^NAC8_ARATH^Q:181-399,H:1-76^71.053%ID^E:8.95e-33^RecName: Full=SUPPRESSOR OF GAMMA RESPONSE 1 {ECO:0000303|PubMed:19549833};^Eukaryota; Viridiplantae; Streptophyta; Embryophyta; Tracheophyta; Spermatophyta; Magnoliophyta; eudicotyledons; Gunneridae; Pentapetalae; rosids; malvids; Brassicales; Brassicaceae; Camelineae; Arabidopsis	.	.	.	.	.	.	.	ENOG410YADT^Nac domain-containing protein	KEGG:ath:AT1G25580	GO:0005634^cellular_component^nucleus`GO:0043565^molecular_function^sequence-specific DNA binding`GO:0003700^molecular_function^DNA binding transcription factor activity`GO:0000077^biological_process^DNA damage checkpoint`GO:0040020^biological_process^regulation of meiotic nuclear division`GO:0010332^biological_process^response to gamma radiation`GO:0006351^biological_process^transcription, DNA-t…	.	.	.
TRINITY_DN108818_c0_g1	TRINITY_DN108818_c0_g1_i1	.	.	.	.	.	.	.	.	.	.	.	.	.	.
TRINITY_DN108807_c0_g1	TRINITY_DN108807_c0_g1_i1	.	.	.	.	.	.	.	.	.	.	.	.	.	.
TRINITY_DN108889_c0_g1	TRINITY_DN108889_c0_g1_i1	.	.	TRINITY_DN108889_c0_g1_i1|m.6	1-876[+]	.	PF05678.13^VQ^VQ motif^30-57^E:1.8e-12	.	.	.	.	.	.	.	.
TRINITY_DN108824_c0_g1	TRINITY_DN108824_c0_g1_i1	.	.	TRINITY_DN108824_c0_g1_i1|m.7	646-2[-]	.	.	.	.	.	.	.	.	.	.
TRINITY_DN108897_c0_g1	TRINITY_DN108897_c0_g1_i1	.	.	.	.	.	.	.	.	.	.	.	.	.	.
TRINITY_DN108837_c0_g1	TRINITY_DN108837_c0_g1_i1	ATD1A_DANRE^ATD1A_DANRE^Q:4-273,H:275-352^31.111%ID^E:6.74e-07^RecName: Full=ATPase family AAA domain-containing protein 1-A;^Eukaryota; Metazoa; Chordata; Craniata; Vertebrata; Euteleostomi; Actinopterygii; Neopterygii; Teleostei; Ostariophysi; Cypriniformes; Cyprinidae; Danio	.	TRINITY_DN108837_c0_g1_i1|m.8	1-405[+]	ATD1A_DANRE^ATD1A_DANRE^Q:2-91,H:275-352^31.111%ID^E:7.07e-08^RecName: Full=ATPase family AAA domain-containing protein 1-A;^Eukaryota; Metazoa; Chordata; Craniata; Vertebrata; Euteleostomi; Actinopterygii; Neopterygii; Teleostei; Ostariophysi; Cypriniformes; Cyprinidae; Danio	.	.	.	COG0464^Aaa atpase	KEGG:dre:368672	GO:0030054^cellular_component^cell junction`GO:0005634^cellular_component^nucleus`GO:0005777^cellular_component^peroxisome`GO:0045211^cellular_component^postsynaptic membrane`GO:0005524^molecular_function^ATP binding`GO:0016887^molecular_function^ATPase activity	.	.	.
TRINITY_DN108891_c0_g1	TRINITY_DN108891_c0_g1_i1	.	.	.	.	.	.	.	.	.	.	.	.	.	.
TRINITY_DN108894_c0_g1	TRINITY_DN108894_c0_g1_i1	.	.	.	.	.	.	.	.	.	.	.	.	.	.
TRINITY_DN108860_c0_g1	TRINITY_DN108860_c0_g1_i1	LHW_ARATH^LHW_ARATH^Q:26-334,H:419-521^55.769%ID^E:3.96e-32^RecName: Full=Transcription factor LHW;^Eukaryota; Viridiplantae; Streptophyta; Embryophyta; Tracheophyta; Spermatophyta; Magnoliophyta; eudicotyledons; Gunneridae; Pentapetalae; rosids; malvids; Brassicales; Brassicaceae; Camelineae; Arabidopsis	.	TRINITY_DN108860_c0_g1_i1|m.9	2-334[+]	LHW_ARATH^LHW_ARATH^Q:9-111,H:419-521^55.769%ID^E:3.56e-32^RecName: Full=Transcription factor LHW;^Eukaryota; Viridiplantae; Streptophyta; Embryophyta; Tracheophyta; Spermatophyta; Magnoliophyta; eudicotyledons; Gunneridae; Pentapetalae; rosids; malvids; Brassicales; Brassicaceae; Camelineae; Arabidopsis	.	.	.	ENOG4111M9E^expressed protein	KEGG:ath:AT2G27230	GO:0005634^cellular_component^nucleus`GO:0003677^molecular_function^DNA binding`GO:0046983^molecular_function^protein dimerization activity`GO:0003700^molecular_function^DNA binding transcription factor activity`GO:0010078^biological_process^maintenance of root meristem identity`GO:0045893^biological_process^positive regulation of transcription, DNA-templated`GO:0006355^biological_process^regulat…	.	.	.
TRINITY_DN108821_c0_g1	TRINITY_DN108821_c0_g1_i1	LNK2_ARATH^LNK2_ARATH^Q:17-406,H:36-194^37.654%ID^E:6.55e-23^RecName: Full=Protein LNK2 {ECO:0000303|PubMed:23818596};^Eukaryota; Viridiplantae; Streptophyta; Embryophyta; Tracheophyta; Spermatophyta; Magnoliophyta; eudicotyledons; Gunneridae; Pentapetalae; rosids; malvids; Brassicales; Brassicaceae; Camelineae; Arabidopsis	.	TRINITY_DN108821_c0_g1_i1|m.10	2-424[+]	LNK2_ARATH^LNK2_ARATH^Q:17-135,H:44-194^37.748%ID^E:2.44e-23^RecName: Full=Protein LNK2 {ECO:0000303|PubMed:23818596};^Eukaryota; Viridiplantae; Streptophyta; Embryophyta; Tracheophyta; Spermatophyta; Magnoliophyta; eudicotyledons; Gunneridae; Pentapetalae; rosids; malvids; Brassicales; Brassicaceae; Camelineae; Arabidopsis	.	.	.	.	KEGG:ath:AT3G54500	GO:0005634^cellular_component^nucleus`GO:0006355^biological_process^regulation of transcription, DNA-templated`GO:0048511^biological_process^rhythmic process`GO:0006351^biological_process^transcription, DNA-templated	.	.	.
TRINITY_DN108834_c0_g1	TRINITY_DN108834_c0_g1_i1	.	.	.	.	.	.	.	.	.	.	.	.	.	.
TRINITY_DN108877_c0_g1	TRINITY_DN108877_c0_g1_i1	.	.	TRINITY_DN108877_c0_g1_i1|m.11	655-131[-]	.	.	.	.	.	.	.	.	.	.
TRINITY_DN108836_c0_g1	TRINITY_DN108836_c0_g1_i1	.	.	.	.	.	.	.	.	.	.	.	.	.	.
TRINITY_DN108816_c0_g1	TRINITY_DN108816_c0_g1_i1	.	.	.	.	.	.	.	.	.	.	.	.	.	.
TRINITY_DN108830_c0_g1	TRINITY_DN108830_c0_g1_i1	DRMH3_ARATH^DRMH3_ARATH^Q:273-443,H:1-64^64.062%ID^E:7.18e-17^RecName: Full=Dormancy-associated protein homolog 3 {ECO:0000305};^Eukaryota; Viridiplantae; Streptophyta; Embryophyta; Tracheophyta; Spermatophyta; Magnoliophyta; eudicotyledons; Gunneridae; Pentapetalae; rosids; malvids; Brassicales; Brassicaceae; Camelineae; Arabidopsis	.	.	.	.	.	.	.	ENOG410YZ0W^Dormancy auxin associated	KEGG:ath:AT1G56220	.	.	.	.
TRINITY_DN108882_c0_g1	TRINITY_DN108882_c0_g1_i1	.	.	.	.	.	.	.	.	.	.	.	.	.	.
TRINITY_DN108872_c0_g1	TRINITY_DN108872_c0_g1_i1	.	.	.	.	.	.	.	.	.	.	.	.	.	.
TRINITY_DN108815_c0_g1	TRINITY_DN108815_c0_g1_i1	.	.	.	.	.	.	.	.	.	.	.	.	.	.
TRINITY_DN108895_c0_g1	TRINITY_DN108895_c0_g1_i1	.	.	.	.	.	.	.	.	.	.	.	.	.	.
TRINITY_DN108850_c0_g1	TRINITY_DN108850_c0_g1_i1	SY112_ARATH^SY112_ARATH^Q:2-385,H:147-278^56.818%ID^E:2.07e-44^RecName: Full=Syntaxin-112;^Eukaryota; Viridiplantae; Streptophyta; Embryophyta; Tracheophyta; Spermatophyta; Magnoliophyta; eudicotyledons; Gunneridae; Pentapetalae; rosids; malvids; Brassicales; Brassicaceae; Camelineae; Arabidopsis	.	TRINITY_DN108850_c0_g1_i1|m.12	2-391[+]	SY112_ARATH^SY112_ARATH^Q:1-128,H:147-278^56.818%ID^E:1.86e-44^RecName: Full=Syntaxin-112;^Eukaryota; Viridiplantae; Streptophyta; Embryophyta; Tracheophyta; Spermatophyta; Magnoliophyta; eudicotyledons; Gunneridae; Pentapetalae; rosids; malvids; Brassicales; Brassicaceae; Camelineae; Arabidopsis	PF00804.24^Syntaxin^Syntaxin^1-95^E:8.9e-24	.	.	COG5074^SYNtaxin	KEGG:ath:AT2G18260`KO:K08486	GO:0012505^cellular_component^endomembrane system`GO:0016021^cellular_component^integral component of membrane`GO:0005634^cellular_component^nucleus`GO:0005886^cellular_component^plasma membrane`GO:0031201^cellular_component^SNARE complex`GO:0005484^molecular_function^SNAP receptor activity`GO:0000149^molecular_function^SNARE binding`GO:0006887^biological_process^exocytosis`GO:0006886^biological_…	GO:0016020^cellular_component^membrane	.	.
TRINITY_DN108885_c0_g1	TRINITY_DN108885_c0_g1_i1	.	.	.	.	.	.	.	.	.	.	.	.	.	.
TRINITY_DN108863_c0_g1	TRINITY_DN108863_c0_g1_i1	CLPX1_ARATH^CLPX1_ARATH^Q:432-521,H:259-288^90%ID^E:1.62e-08^RecName: Full=CLP protease regulatory subunit CLPX1, mitochondrial {ECO:0000303|PubMed:11299370};^Eukaryota; Viridiplantae; Streptophyta; Embryophyta; Tracheophyta; Spermatophyta; Magnoliophyta; eudicotyledons; Gunneridae; Pentapetalae; rosids; malvids; Brassicales; Brassicaceae; Camelineae; Arabidopsis	.	.	.	.	.	.	.	COG1219^ATP-dependent specificity component of the Clp protease. It directs the protease to specific substrates. Can perform chaperone functions in the absence of ClpP (By similarity)	KEGG:ath:AT5G53350`KO:K03544	GO:0005739^cellular_component^mitochondrion`GO:0005524^molecular_function^ATP binding`GO:0004176^molecular_function^ATP-dependent peptidase activity`GO:0051082^molecular_function^unfolded protein binding`GO:0030163^biological_process^protein catabolic process`GO:0006457^biological_process^protein folding`GO:0006508^biological_process^proteolysis	.	.	.
TRINITY_DN108884_c0_g1	TRINITY_DN108884_c0_g1_i1	PFPA_SOLTU^PFPA_SOLTU^Q:169-528,H:1-120^85%ID^E:3.26e-70^RecName: Full=Pyrophosphate--fructose 6-phosphate 1-phosphotransferase subunit alpha {ECO:0000255|HAMAP-Rule:MF_03185};^Eukaryota; Viridiplantae; Streptophyta; Embryophyta; Tracheophyta; Spermatophyta; Magnoliophyta; eudicotyledons; Gunneridae; Pentapetalae; asterids; lamiids; Solanales; Solanaceae; Solanoideae; Solaneae; Solanum	.	TRINITY_DN108884_c0_g1_i1|m.13	1-567[+]	PFPA_SOLTU^PFPA_SOLTU^Q:57-189,H:1-133^86.466%ID^E:1.05e-80^RecName: Full=Pyrophosphate--fructose 6-phosphate 1-phosphotransferase subunit alpha {ECO:0000255|HAMAP-Rule:MF_03185};^Eukaryota; Viridiplantae; Streptophyta; Embryophyta; Tracheophyta; Spermatophyta; Magnoliophyta; eudicotyledons; Gunneridae; Pentapetalae; asterids; lamiids; Solanales; Solanaceae; Solanoideae; Solaneae; Solanum	.	.	.	COG0205^phosphohexokinase	KEGG:sot:102577617`KO:K00895	GO:0005737^cellular_component^cytoplasm`GO:0003872^molecular_function^6-phosphofructokinase activity`GO:0005524^molecular_function^ATP binding`GO:0047334^molecular_function^diphosphate-fructose-6-phosphate 1-phosphotransferase activity`GO:0046872^molecular_function^metal ion binding	.	.	.
TRINITY_DN108817_c0_g1	TRINITY_DN108817_c0_g1_i1	SBT19_ARATH^SBT19_ARATH^Q:435-1,H:40-177^41.781%ID^E:2.46e-28^RecName: Full=Subtilisin-like protease SBT1.9 {ECO:0000303|PubMed:16193095};^Eukaryota; Viridiplantae; Streptophyta; Embryophyta; Tracheophyta; Spermatophyta; Magnoliophyta; eudicotyledons; Gunneridae; Pentapetalae; rosids; malvids; Brassicales; Brassicaceae; Camelineae; Arabidopsis	.	TRINITY_DN108817_c0_g1_i1|m.14	630-1[-]	SBT19_ARATH^SBT19_ARATH^Q:66-210,H:40-177^41.781%ID^E:7.27e-29^RecName: Full=Subtilisin-like protease SBT1.9 {ECO:0000303|PubMed:16193095};^Eukaryota; Viridiplantae; Streptophyta; Embryophyta; Tracheophyta; Spermatophyta; Magnoliophyta; eudicotyledons; Gunneridae; Pentapetalae; rosids; malvids; Brassicales; Brassicaceae; Camelineae; Arabidopsis	PF05922.15^Inhibitor_I9^Peptidase inhibitor I9^48-129^E:2.7e-09`PF00082.21^Peptidase_S8^Subtilase family^158-197^E:1.2e-05	sigP:1^31^0.7^YES	.	ENOG410YG96^subtilisin-like	KEGG:ath:AT5G67090	GO:0005576^cellular_component^extracellular region`GO:0004252^molecular_function^serine-type endopeptidase activity`GO:0006508^biological_process^proteolysis	GO:0004252^molecular_function^serine-type endopeptidase activity`GO:0006508^biological_process^proteolysis	.	.
TRINITY_DN108873_c0_g1	TRINITY_DN108873_c0_g1_i1	.	.	.	.	.	.	.	.	.	.	.	.	.	.
TRINITY_DN108803_c0_g1	TRINITY_DN108803_c0_g1_i1	NLP1_ORYSJ^NLP1_ORYSJ^Q:156-311,H:311-362^44.231%ID^E:2.49e-09^RecName: Full=Protein NLP1;^Eukaryota; Viridiplantae; Streptophyta; Embryophyta; Tracheophyta; Spermatophyta; Magnoliophyta; Liliopsida; Poales; Poaceae; BOP clade; Oryzoideae; Oryzeae; Oryzinae; Oryza; Oryza sativa	.	.	.	.	.	.	.	ENOG41129QX^RWP-RK domain-containing protein	KEGG:osa:4331508	GO:0005634^cellular_component^nucleus`GO:0003677^molecular_function^DNA binding`GO:0006355^biological_process^regulation of transcription, DNA-templated`GO:0006351^biological_process^transcription, DNA-templated	.	.	.
TRINITY_DN108844_c0_g3	TRINITY_DN108844_c0_g3_i1	.	.	.	.	.	.	.	.	.	.	.	.	.	.
TRINITY_DN108868_c0_g1	TRINITY_DN108868_c0_g1_i1	.	.	TRINITY_DN108868_c0_g1_i1|m.15	3-353[+]	.	.	.	.	.	.	.	.	.	.
TRINITY_DN108845_c0_g1	TRINITY_DN108845_c0_g1_i1	.	.	TRINITY_DN108845_c0_g1_i1|m.16	578-174[-]	.	.	.	.	.	.	.	.	.	.
TRINITY_DN108845_c0_g1	TRINITY_DN108845_c0_g1_i1	.	.	TRINITY_DN108845_c0_g1_i1|m.17	439-134[-]	.	.	.	.	.	.	.	.	.	.
TRINITY_DN108899_c0_g1	TRINITY_DN108899_c0_g1_i1	.	.	.	.	.	.	.	.	.	.	.	.	.	.
TRINITY_DN108825_c0_g5	TRINITY_DN108825_c0_g5_i1	.	.	.	.	.	.	.	.	.	.	.	.	.	.
TRINITY_DN108848_c0_g1	TRINITY_DN108848_c0_g1_i1	Y1461_ARATH^Y1461_ARATH^Q:603-686,H:401-428^75%ID^E:3.47e-06^RecName: Full=Probable serine/threonine-protein kinase At1g54610;^Eukaryota; Viridiplantae; Streptophyta; Embryophyta; Tracheophyta; Spermatophyta; Magnoliophyta; eudicotyledons; Gunneridae; Pentapetalae; rosids; malvids; Brassicales; Brassicaceae; Camelineae; Arabidopsis	.	.	.	.	.	.	.	ENOG410XPIR^Cyclin-Dependent Kinase	KEGG:ath:AT1G54610`KO:K08819	GO:0005634^cellular_component^nucleus`GO:0005524^molecular_function^ATP binding`GO:0004693^molecular_function^cyclin-dependent protein serine/threonine kinase activity`GO:0006468^biological_process^protein phosphorylation	.	.	.
TRINITY_DN108892_c0_g1	TRINITY_DN108892_c0_g1_i1	EDR2_ARATH^EDR2_ARATH^Q:283-369,H:617-645^89.655%ID^E:2.32e-11^RecName: Full=Protein ENHANCED DISEASE RESISTANCE 2;^Eukaryota; Viridiplantae; Streptophyta; Embryophyta; Tracheophyta; Spermatophyta; Magnoliophyta; eudicotyledons; Gunneridae; Pentapetalae; rosids; malvids; Brassicales; Brassicaceae; Camelineae; Arabidopsis`EDR2_ARATH^EDR2_ARATH^Q:2-70,H:597-619^91.304%ID^E:2.99e-06^RecName: Full=Pr…	.	.	.	.	.	.	.	ENOG4112846^Domain containing protein, expressed	KEGG:ath:AT4G19040	GO:0005789^cellular_component^endoplasmic reticulum membrane`GO:0010008^cellular_component^endosome membrane`GO:0016021^cellular_component^integral component of membrane`GO:0005886^cellular_component^plasma membrane`GO:0008289^molecular_function^lipid binding`GO:0070273^molecular_function^phosphatidylinositol-4-phosphate binding`GO:0009873^biological_process^ethylene-activated signaling pathway`G…	.	.	.
TRINITY_DN108876_c0_g1	TRINITY_DN108876_c0_g1_i1	RAB1B_ARATH^RAB1B_ARATH^Q:2-100,H:156-188^66.667%ID^E:6.73e-06^RecName: Full=Ras-related protein RABB1b;^Eukaryota; Viridiplantae; Streptophyta; Embryophyta; Tracheophyta; Spermatophyta; Magnoliophyta; eudicotyledons; Gunneridae; Pentapetalae; rosids; malvids; Brassicales; Brassicaceae; Camelineae; Arabidopsis	.	TRINITY_DN108876_c0_g1_i1|m.18	484-113[-]	.	.	.	.	.	.	.	.	.	.
TRINITY_DN108858_c0_g1	TRINITY_DN108858_c0_g1_i1	BRM_ARATH^BRM_ARATH^Q:46-522,H:93-239^39.881%ID^E:1.22e-24^RecName: Full=ATP-dependent helicase BRM {ECO:0000303|PubMed:15371304};^Eukaryota; Viridiplantae; Streptophyta; Embryophyta; Tracheophyta; Spermatophyta; Magnoliophyta; eudicotyledons; Gunneridae; Pentapetalae; rosids; malvids; Brassicales; Brassicaceae; Camelineae; Arabidopsis`BRM_ARATH^BRM_ARATH^Q:566-865,H:255-351^49%ID^E:1.22e-24^RecN…	.	TRINITY_DN108858_c0_g1_i1|m.19	295-603[+]	.	.	.	.	.	.	.	.	.	.
TRINITY_DN108859_c0_g1	TRINITY_DN108859_c0_g1_i1	AMY3_ARATH^AMY3_ARATH^Q:1-93,H:711-741^80.645%ID^E:2.21e-08^RecName: Full=Alpha-amylase 3, chloroplastic {ECO:0000303|PubMed:15637061};^Eukaryota; Viridiplantae; Streptophyta; Embryophyta; Tracheophyta; Spermatophyta; Magnoliophyta; eudicotyledons; Gunneridae; Pentapetalae; rosids; malvids; Brassicales; Brassicaceae; Camelineae; Arabidopsis	.	.	.	.	.	.	.	COG0366^alpha amylase, catalytic	KEGG:ath:AT1G69830	GO:0009507^cellular_component^chloroplast`GO:0009570^cellular_component^chloroplast stroma`GO:0004556^molecular_function^alpha-amylase activity`GO:0103025^molecular_function^alpha-amylase activity (releasing maltohexaose)`GO:0005509^molecular_function^calcium ion binding`GO:0005983^biological_process^starch catabolic process	.	.	.
TRINITY_DN108842_c0_g1	TRINITY_DN108842_c0_g1_i1	.	.	.	.	.	.	.	.	.	.	.	.	.	.
TRINITY_DN108893_c0_g1	TRINITY_DN108893_c0_g1_i1	.	.	.	.	.	.	.	.	.	.	.	.	.	.
TRINITY_DN108853_c0_g1	TRINITY_DN108853_c0_g1_i1	LUT1_ARATH^LUT1_ARATH^Q:2-82,H:504-530^77.778%ID^E:1.05e-06^RecName: Full=Carotene epsilon-monooxygenase, chloroplastic;^Eukaryota; Viridiplantae; Streptophyta; Embryophyta; Tracheophyta; Spermatophyta; Magnoliophyta; eudicotyledons; Gunneridae; Pentapetalae; rosids; malvids; Brassicales; Brassicaceae; Camelineae; Arabidopsis	.	TRINITY_DN108853_c0_g1_i1|m.20	2-334[+]	LUT1_ARATH^LUT1_ARATH^Q:1-27,H:504-530^77.778%ID^E:2.35e-07^RecName: Full=Carotene epsilon-monooxygenase, chloroplastic;^Eukaryota; Viridiplantae; Streptophyta; Embryophyta; Tracheophyta; Spermatophyta; Magnoliophyta; eudicotyledons; Gunneridae; Pentapetalae; rosids; malvids; Brassicales; Brassicaceae; Camelineae; Arabidopsis	.	.	.	COG2124^Cytochrome p450	KEGG:ath:AT3G53130`KO:K09837	GO:0009507^cellular_component^chloroplast`GO:0009941^cellular_component^chloroplast envelope`GO:0031969^cellular_component^chloroplast membrane`GO:0020037^molecular_function^heme binding`GO:0005506^molecular_function^iron ion binding`GO:0009974^molecular_function^zeinoxanthin epsilon hydroxylase activity`GO:0016117^biological_process^carotenoid biosynthetic process	.	.	.
TRINITY_DN108839_c0_g1	TRINITY_DN108839_c0_g1_i1	.	.	.	.	.	.	.	.	.	.	.	.	.	.
TRINITY_DN108808_c0_g1	TRINITY_DN108808_c0_g1_i1	.	.	.	.	.	.	.	.	.	.	.	.	.	.
TRINITY_DN113487_c0_g1	TRINITY_DN113487_c0_g1_i1	.	.	.	.	.	.	.	.	.	.	.	.	.	.
TRINITY_DN113438_c0_g1	TRINITY_DN113438_c0_g1_i1	.	.	.	.	.	.	.	.	.	.	.	.	.	.
TRINITY_DN113497_c0_g1	TRINITY_DN113497_c0_g1_i1	RNHX1_ARATH^RNHX1_ARATH^Q:1229-705,H:1-204^30.392%ID^E:2.41e-32^RecName: Full=Putative ribonuclease H protein At1g65750;^Eukaryota; Viridiplantae; Streptophyta; Embryophyta; Tracheophyta; Spermatophyta; Magnoliophyta; eudicotyledons; Gunneridae; Pentapetalae; rosids; malvids; Brassicales; Brassicaceae; Camelineae; Arabidopsis`RNHX1_ARATH^RNHX1_ARATH^Q:693-367,H:217-342^29.365%ID^E:2.41e-32^RecNam…	.	TRINITY_DN113497_c0_g1_i1|m.21	2748-2323[-]	.	.	.	.	.	.	.	.	.	.
TRINITY_DN113497_c0_g1	TRINITY_DN113497_c0_g1_i1	RNHX1_ARATH^RNHX1_ARATH^Q:1229-705,H:1-204^30.392%ID^E:2.41e-32^RecName: Full=Putative ribonuclease H protein At1g65750;^Eukaryota; Viridiplantae; Streptophyta; Embryophyta; Tracheophyta; Spermatophyta; Magnoliophyta; eudicotyledons; Gunneridae; Pentapetalae; rosids; malvids; Brassicales; Brassicaceae; Camelineae; Arabidopsis`RNHX1_ARATH^RNHX1_ARATH^Q:693-367,H:217-342^29.365%ID^E:2.41e-32^RecNam…	.	TRINITY_DN113497_c0_g1_i1|m.22	3377-3063[-]	.	.	.	ExpAA=16.68^PredHel=1^Topology=i5-27o	.	.	.	.	.	.
TRINITY_DN113447_c0_g1	TRINITY_DN113447_c0_g1_i1	AL7B4_ARATH^AL7B4_ARATH^Q:377-1900,H:1-508^82.874%ID^E:0^RecName: Full=Aldehyde dehydrogenase family 7 member B4;^Eukaryota; Viridiplantae; Streptophyta; Embryophyta; Tracheophyta; Spermatophyta; Magnoliophyta; eudicotyledons; Gunneridae; Pentapetalae; rosids; malvids; Brassicales; Brassicaceae; Camelineae; Arabidopsis	.	TRINITY_DN113447_c0_g1_i1|m.23	377-1903[+]	AL7B4_ARATH^AL7B4_ARATH^Q:1-508,H:1-508^82.874%ID^E:0^RecName: Full=Aldehyde dehydrogenase family 7 member B4;^Eukaryota; Viridiplantae; Streptophyta; Embryophyta; Tracheophyta; Spermatophyta; Magnoliophyta; eudicotyledons; Gunneridae; Pentapetalae; rosids; malvids; Brassicales; Brassicaceae; Camelineae; Arabidopsis	PF00171.21^Aldedh^Aldehyde dehydrogenase family^36-489^E:4.2e-132	.	.	COG1012^Dehydrogenase	KEGG:ath:AT1G54100`KO:K14085	GO:0005829^cellular_component^cytosol`GO:0004029^molecular_function^aldehyde dehydrogenase (NAD) activity`GO:0006081^biological_process^cellular aldehyde metabolic process`GO:0009737^biological_process^response to abscisic acid`GO:0009269^biological_process^response to desiccation`GO:0009651^biological_process^response to salt stress	GO:0016491^molecular_function^oxidoreductase activity`GO:0008152^biological_process^metabolic process`GO:0055114^biological_process^oxidation-reduction process	.	.
TRINITY_DN113492_c1_g1	TRINITY_DN113492_c1_g1_i1	RECAC_ARATH^RECAC_ARATH^Q:290-1477,H:22-411^78.392%ID^E:0^RecName: Full=DNA repair protein recA homolog 1, chloroplastic;^Eukaryota; Viridiplantae; Streptophyta; Embryophyta; Tracheophyta; Spermatophyta; Magnoliophyta; eudicotyledons; Gunneridae; Pentapetalae; rosids; malvids; Brassicales; Brassicaceae; Camelineae; Arabidopsis	.	TRINITY_DN113492_c1_g1_i1|m.24	233-1546[+]	RECAC_ARATH^RECAC_ARATH^Q:20-415,H:22-411^78.392%ID^E:0^RecName: Full=DNA repair protein recA homolog 1, chloroplastic;^Eukaryota; Viridiplantae; Streptophyta; Embryophyta; Tracheophyta; Spermatophyta; Magnoliophyta; eudicotyledons; Gunneridae; Pentapetalae; rosids; malvids; Brassicales; Brassicaceae; Camelineae; Arabidopsis	PF00154.20^RecA^recA bacterial DNA recombination protein^89-351^E:1.5e-117`PF08423.10^Rad51^Rad51^123-306^E:1.5e-08	.	.	COG0468^Can catalyze the hydrolysis of ATP in the presence of single-stranded DNA, the ATP-dependent uptake of single-stranded DNA by duplex DNA, and the ATP-dependent hybridization of homologous single-stranded DNAs. It interacts with LexA causing its activation and leading to its autocatalytic cleavage (By similarity)	KEGG:ath:AT1G79050`KO:K03553	GO:0009570^cellular_component^chloroplast stroma`GO:0005524^molecular_function^ATP binding`GO:0008094^molecular_function^DNA-dependent ATPase activity`GO:0003690^molecular_function^double-stranded DNA binding`GO:0000400^molecular_function^four-way junction DNA binding`GO:0000150^molecular_function^recombinase activity`GO:0003697^molecular_function^single-stranded DNA binding`GO:0006974^biological…	GO:0003697^molecular_function^single-stranded DNA binding`GO:0005524^molecular_function^ATP binding`GO:0006281^biological_process^DNA repair	.	.
TRINITY_DN113488_c0_g1	TRINITY_DN113488_c0_g1_i1	PHB7_ARATH^PHB7_ARATH^Q:1-195,H:212-276^81.538%ID^E:1.28e-26^RecName: Full=Prohibitin-7, mitochondrial;^Eukaryota; Viridiplantae; Streptophyta; Embryophyta; Tracheophyta; Spermatophyta; Magnoliophyta; eudicotyledons; Gunneridae; Pentapetalae; rosids; malvids; Brassicales; Brassicaceae; Camelineae; Arabidopsis	.	.	.	.	.	.	.	COG0330^Band 7 protein	KEGG:ath:AT5G44140`KO:K17081	GO:0016021^cellular_component^integral component of membrane`GO:0016020^cellular_component^membrane`GO:0005747^cellular_component^mitochondrial respiratory chain complex I`GO:0005739^cellular_component^mitochondrion`GO:0009506^cellular_component^plasmodesma	.	.	.
TRINITY_DN113406_c0_g1	TRINITY_DN113406_c0_g1_i1	.	.	.	.	.	.	.	.	.	.	.	.	.	.
TRINITY_DN113449_c0_g1	TRINITY_DN113449_c0_g1_i1	AML3_ARATH^AML3_ARATH^Q:3-314,H:81-194^38.136%ID^E:5.62e-07^RecName: Full=Protein MEI2-like 3;^Eukaryota; Viridiplantae; Streptophyta; Embryophyta; Tracheophyta; Spermatophyta; Magnoliophyta; eudicotyledons; Gunneridae; Pentapetalae; rosids; malvids; Brassicales; Brassicaceae; Camelineae; Arabidopsis	.	TRINITY_DN113449_c0_g1_i1|m.25	3-401[+]	AML3_ARATH^AML3_ARATH^Q:1-104,H:81-194^38.136%ID^E:1.18e-15^RecName: Full=Protein MEI2-like 3;^Eukaryota; Viridiplantae; Streptophyta; Embryophyta; Tracheophyta; Spermatophyta; Magnoliophyta; eudicotyledons; Gunneridae; Pentapetalae; rosids; malvids; Brassicales; Brassicaceae; Camelineae; Arabidopsis	.	.	.	ENOG4111R9F^Rna-binding protein	.	GO:0005634^cellular_component^nucleus`GO:0003723^molecular_function^RNA binding`GO:0051321^biological_process^meiotic cell cycle`GO:0045927^biological_process^positive regulation of growth`GO:0045836^biological_process^positive regulation of meiotic nuclear division	.	.	.
TRINITY_DN113473_c0_g1	TRINITY_DN113473_c0_g1_i1	.	.	.	.	.	.	.	.	.	.	.	.	.	.
TRINITY_DN113495_c0_g1	TRINITY_DN113495_c0_g1_i1	ASP1_ORYSJ^ASP1_ORYSJ^Q:401-3,H:37-173^49.286%ID^E:3.36e-33^RecName: Full=Aspartic proteinase Asp1;^Eukaryota; Viridiplantae; Streptophyta; Embryophyta; Tracheophyta; Spermatophyta; Magnoliophyta; Liliopsida; Poales; Poaceae; BOP clade; Oryzoideae; Oryzeae; Oryzinae; Oryza; Oryza sativa	.	TRINITY_DN113495_c0_g1_i1|m.26	413-3[-]	ASP1_ORYSJ^ASP1_ORYSJ^Q:5-137,H:37-173^49.286%ID^E:3.02e-33^RecName: Full=Aspartic proteinase Asp1;^Eukaryota; Viridiplantae; Streptophyta; Embryophyta; Tracheophyta; Spermatophyta; Magnoliophyta; Liliopsida; Poales; Poaceae; BOP clade; Oryzoideae; Oryzeae; Oryzinae; Oryza; Oryza sativa	PF14543.5^TAXi_N^Xylanase inhibitor N-terminal^6-137^E:3.2e-33	.	.	ENOG410XNV7^aspartic	KEGG:osa:4349962	GO:0004190^molecular_function^aspartic-type endopeptidase activity`GO:0030163^biological_process^protein catabolic process`GO:0006508^biological_process^proteolysis	.	.	.
TRINITY_DN113495_c0_g1	TRINITY_DN113495_c0_g1_i1	ASP1_ORYSJ^ASP1_ORYSJ^Q:401-3,H:37-173^49.286%ID^E:3.36e-33^RecName: Full=Aspartic proteinase Asp1;^Eukaryota; Viridiplantae; Streptophyta; Embryophyta; Tracheophyta; Spermatophyta; Magnoliophyta; Liliopsida; Poales; Poaceae; BOP clade; Oryzoideae; Oryzeae; Oryzinae; Oryza; Oryza sativa	.	TRINITY_DN113495_c0_g1_i1|m.27	27-368[+]	.	.	.	.	.	.	.	.	.	.
TRINITY_DN113450_c0_g1	TRINITY_DN113450_c0_g1_i1	.	.	TRINITY_DN113450_c0_g1_i1|m.28	405-1[-]	.	.	sigP:1^20^0.539^YES	.	.	.	.	.	.	.
TRINITY_DN113489_c0_g1	TRINITY_DN113489_c0_g1_i1	.	.	.	.	.	.	.	.	.	.	.	.	.	.
TRINITY_DN113499_c0_g1	TRINITY_DN113499_c0_g1_i1	MO25N_ARATH^MO25N_ARATH^Q:230-1243,H:1-341^66.862%ID^E:1.52e-172^RecName: Full=Putative MO25-like protein At5g47540;^Eukaryota; Viridiplantae; Streptophyta; Embryophyta; Tracheophyta; Spermatophyta; Magnoliophyta; eudicotyledons; Gunneridae; Pentapetalae; rosids; malvids; Brassicales; Brassicaceae; Camelineae; Arabidopsis	.	TRINITY_DN113499_c0_g1_i1|m.29	230-1282[+]	MO25N_ARATH^MO25N_ARATH^Q:1-338,H:1-341^66.862%ID^E:9.97e-175^RecName: Full=Putative MO25-like protein At5g47540;^Eukaryota; Viridiplantae; Streptophyta; Embryophyta; Tracheophyta; Spermatophyta; Magnoliophyta; eudicotyledons; Gunneridae; Pentapetalae; rosids; malvids; Brassicales; Brassicaceae; Camelineae; Arabidopsis	PF08569.10^Mo25^Mo25-like^4-334^E:1.9e-114	.	.	ENOG410XP4S^Calcium binding protein	KEGG:ath:AT5G47540`KO:K08272	.	.	.	.
TRINITY_DN113437_c0_g1	TRINITY_DN113437_c0_g1_i1	LRP1C_ARATH^LRP1C_ARATH^Q:224-550,H:33-138^39.286%ID^E:1.38e-09^RecName: Full=La-related protein 1C;^Eukaryota; Viridiplantae; Streptophyta; Embryophyta; Tracheophyta; Spermatophyta; Magnoliophyta; eudicotyledons; Gunneridae; Pentapetalae; rosids; malvids; Brassicales; Brassicaceae; Camelineae; Arabidopsis	.	TRINITY_DN113437_c0_g1_i1|m.30	164-904[+]	LRP1C_ARATH^LRP1C_ARATH^Q:21-201,H:33-215^36.41%ID^E:6.93e-14^RecName: Full=La-related protein 1C;^Eukaryota; Viridiplantae; Streptophyta; Embryophyta; Tracheophyta; Spermatophyta; Magnoliophyta; eudicotyledons; Gunneridae; Pentapetalae; rosids; malvids; Brassicales; Brassicaceae; Camelineae; Arabidopsis	.	.	.	COG5193^La ribonucleoprotein domain family member	KEGG:ath:AT4G35890`KO:K18757	GO:0005737^cellular_component^cytoplasm`GO:0005844^cellular_component^polysome`GO:0003729^molecular_function^mRNA binding`GO:0009738^biological_process^abscisic acid-activated signaling pathway`GO:0010150^biological_process^leaf senescence`GO:0009737^biological_process^response to abscisic acid`GO:0009753^biological_process^response to jasmonic acid`GO:0009751^biological_process^response to salic…	.	.	.
TRINITY_DN113500_c0_g1	TRINITY_DN113500_c0_g1_i1	WTF1_MAIZE^WTF1_MAIZE^Q:498-1379,H:80-381^28.013%ID^E:1.85e-22^RecName: Full=Protein WHAT'S THIS FACTOR 1 {ECO:0000303|PubMed:19251672};^Eukaryota; Viridiplantae; Streptophyta; Embryophyta; Tracheophyta; Spermatophyta; Magnoliophyta; Liliopsida; Poales; Poaceae; PACMAD clade; Panicoideae; Andropogonodae; Andropogoneae; Tripsacinae; Zea	.	TRINITY_DN113500_c0_g1_i1|m.31	276-1535[+]	WTF1_ARATH^WTF1_ARATH^Q:44-368,H:72-402^27.219%ID^E:2.29e-25^RecName: Full=Protein WHAT'S THIS FACTOR 1 homolog {ECO:0000305};^Eukaryota; Viridiplantae; Streptophyta; Embryophyta; Tracheophyta; Spermatophyta; Magnoliophyta; eudicotyledons; Gunneridae; Pentapetalae; rosids; malvids; Brassicales; Brassicaceae; Camelineae; Arabidopsis	PF11955.7^PORR^Plant organelle RNA recognition domain^51-374^E:8.2e-106	.	.	ENOG4111S5T^Plant organelle RNA recognition domain	KEGG:ath:AT4G01037	GO:0016787^molecular_function^hydrolase activity	.	.	.
TRINITY_DN113409_c0_g1	TRINITY_DN113409_c0_g1_i1	GCA3_ARATH^GCA3_ARATH^Q:361-474,H:3-40^81.579%ID^E:1.92e-15^RecName: Full=Gamma carbonic anhydrase 3, mitochondrial;^Eukaryota; Viridiplantae; Streptophyta; Embryophyta; Tracheophyta; Spermatophyta; Magnoliophyta; eudicotyledons; Gunneridae; Pentapetalae; rosids; malvids; Brassicales; Brassicaceae; Camelineae; Arabidopsis	.	TRINITY_DN113409_c0_g1_i1|m.32	1-474[+]	GCA3_ARATH^GCA3_ARATH^Q:119-158,H:1-40^82.5%ID^E:3.07e-17^RecName: Full=Gamma carbonic anhydrase 3, mitochondrial;^Eukaryota; Viridiplantae; Streptophyta; Embryophyta; Tracheophyta; Spermatophyta; Magnoliophyta; eudicotyledons; Gunneridae; Pentapetalae; rosids; malvids; Brassicales; Brassicaceae; Camelineae; Arabidopsis	.	.	.	COG0663^Transferase	KEGG:ath:AT5G66510	GO:0031966^cellular_component^mitochondrial membrane`GO:0005747^cellular_component^mitochondrial respiratory chain complex I`GO:0005739^cellular_component^mitochondrion`GO:0045271^cellular_component^respiratory chain complex I`GO:0004089^molecular_function^carbonate dehydratase activity`GO:0046872^molecular_function^metal ion binding`GO:0009853^biological_process^photorespiration`GO:0070207^biolo…	.	.	.
TRINITY_DN113401_c0_g1	TRINITY_DN113401_c0_g1_i1	.	.	.	.	.	.	.	.	.	.	.	.	.	.
TRINITY_DN113483_c0_g1	TRINITY_DN113483_c0_g1_i1	.	.	.	.	.	.	.	.	.	.	.	.	.	.
TRINITY_DN113471_c0_g1	TRINITY_DN113471_c0_g1_i1	.	.	.	.	.	.	.	.	.	.	.	.	.	.
TRINITY_DN113471_c1_g1	TRINITY_DN113471_c1_g1_i1	SPL1_ARATH^SPL1_ARATH^Q:140-271,H:1-39^65.217%ID^E:7.63e-12^RecName: Full=Squamosa promoter-binding-like protein 1;^Eukaryota; Viridiplantae; Streptophyta; Embryophyta; Tracheophyta; Spermatophyta; Magnoliophyta; eudicotyledons; Gunneridae; Pentapetalae; rosids; malvids; Brassicales; Brassicaceae; Camelineae; Arabidopsis	.	.	.	.	.	.	.	ENOG4110DQF^Squamosa promoter-binding-like protein	KEGG:ath:AT2G47070	GO:0005634^cellular_component^nucleus`GO:0003677^molecular_function^DNA binding`GO:0046872^molecular_function^metal ion binding`GO:0003700^molecular_function^DNA binding transcription factor activity`GO:0006355^biological_process^regulation of transcription, DNA-templated`GO:0006351^biological_process^transcription, DNA-templated	.	.	.
TRINITY_DN113494_c0_g1	TRINITY_DN113494_c0_g1_i1	.	.	.	.	.	.	.	.	.	.	.	.	.	.
TRINITY_DN113465_c0_g1	TRINITY_DN113465_c0_g1_i1	SEBP3_ARATH^SEBP3_ARATH^Q:3-359,H:170-288^74.79%ID^E:2e-61^RecName: Full=Selenium-binding protein 3;^Eukaryota; Viridiplantae; Streptophyta; Embryophyta; Tracheophyta; Spermatophyta; Magnoliophyta; eudicotyledons; Gunneridae; Pentapetalae; rosids; malvids; Brassicales; Brassicaceae; Camelineae; Arabidopsis	.	TRINITY_DN113465_c0_g1_i1|m.33	3-362[+]	SEBP3_ARATH^SEBP3_ARATH^Q:1-119,H:170-288^74.79%ID^E:1.8e-61^RecName: Full=Selenium-binding protein 3;^Eukaryota; Viridiplantae; Streptophyta; Embryophyta; Tracheophyta; Spermatophyta; Magnoliophyta; eudicotyledons; Gunneridae; Pentapetalae; rosids; malvids; Brassicales; Brassicaceae; Camelineae; Arabidopsis	PF05694.10^SBP56^56kDa selenium binding protein (SBP56)^1-118^E:1.9e-46	.	.	ENOG410XP4F^selenium-binding protein	KEGG:ath:AT3G23800`KO:K17285	GO:0008430^molecular_function^selenium binding	GO:0008430^molecular_function^selenium binding	.	.
TRINITY_DN113444_c0_g2	TRINITY_DN113444_c0_g2_i1	CML23_ARATH^CML23_ARATH^Q:71-541,H:4-157^52.532%ID^E:2.85e-45^RecName: Full=Probable calcium-binding protein CML23;^Eukaryota; Viridiplantae; Streptophyta; Embryophyta; Tracheophyta; Spermatophyta; Magnoliophyta; eudicotyledons; Gunneridae; Pentapetalae; rosids; malvids; Brassicales; Brassicaceae; Camelineae; Arabidopsis	.	TRINITY_DN113444_c0_g2_i1|m.34	59-544[+]	CML23_ARATH^CML23_ARATH^Q:5-161,H:4-157^52.532%ID^E:4.14e-47^RecName: Full=Probable calcium-binding protein CML23;^Eukaryota; Viridiplantae; Streptophyta; Embryophyta; Tracheophyta; Spermatophyta; Magnoliophyta; eudicotyledons; Gunneridae; Pentapetalae; rosids; malvids; Brassicales; Brassicaceae; Camelineae; Arabidopsis	PF13833.5^EF-hand_8^EF-hand domain pair^15-38^E:8.5e-05`PF00036.31^EF-hand_1^EF hand^16-38^E:2.2e-06`PF13499.5^EF-hand_7^EF-hand domain pair^16-78^E:1.1e-13`PF13405.5^EF-hand_6^EF-hand domain^16-44^E:8.7e-06`PF13202.5^EF-hand_5^EF hand^19-37^E:8.7e-06`PF13833.5^EF-hand_8^EF-hand domain pair^36-79^E:1e-09`PF00036.31^EF-hand_1^EF hand^53-78^E:4.8e-09`PF13405.5^EF-hand_6^EF-hand domain^54-80^E:5.3e-…	.	.	COG5126^Calcium-binding protein	KEGG:ath:AT1G66400`KO:K13448	GO:0005509^molecular_function^calcium ion binding`GO:0009909^biological_process^regulation of flower development`GO:0080164^biological_process^regulation of nitric oxide metabolic process	GO:0005509^molecular_function^calcium ion binding	.	.
TRINITY_DN113444_c0_g2	TRINITY_DN113444_c0_g2_i1	CML23_ARATH^CML23_ARATH^Q:71-541,H:4-157^52.532%ID^E:2.85e-45^RecName: Full=Probable calcium-binding protein CML23;^Eukaryota; Viridiplantae; Streptophyta; Embryophyta; Tracheophyta; Spermatophyta; Magnoliophyta; eudicotyledons; Gunneridae; Pentapetalae; rosids; malvids; Brassicales; Brassicaceae; Camelineae; Arabidopsis	.	TRINITY_DN113444_c0_g2_i1|m.35	372-10[-]	.	.	.	.	.	.	.	.	.	.
TRINITY_DN113484_c0_g1	TRINITY_DN113484_c0_g1_i1	NAC72_ARATH^NAC72_ARATH^Q:67-510,H:9-159^32.075%ID^E:2.92e-11^RecName: Full=NAC domain-containing protein 72;^Eukaryota; Viridiplantae; Streptophyta; Embryophyta; Tracheophyta; Spermatophyta; Magnoliophyta; eudicotyledons; Gunneridae; Pentapetalae; rosids; malvids; Brassicales; Brassicaceae; Camelineae; Arabidopsis	.	TRINITY_DN113484_c0_g1_i1|m.36	64-918[+]	NAC72_ARATH^NAC72_ARATH^Q:2-149,H:9-159^32.075%ID^E:6.19e-12^RecName: Full=NAC domain-containing protein 72;^Eukaryota; Viridiplantae; Streptophyta; Embryophyta; Tracheophyta; Spermatophyta; Magnoliophyta; eudicotyledons; Gunneridae; Pentapetalae; rosids; malvids; Brassicales; Brassicaceae; Camelineae; Arabidopsis	PF02365.14^NAM^No apical meristem (NAM) protein^8-136^E:3.8e-18	.	.	.	KEGG:ath:AT4G27410	GO:0005634^cellular_component^nucleus`GO:0003677^molecular_function^DNA binding`GO:0006355^biological_process^regulation of transcription, DNA-templated`GO:0006351^biological_process^transcription, DNA-templated	GO:0003677^molecular_function^DNA binding`GO:0006355^biological_process^regulation of transcription, DNA-templated	.	.
TRINITY_DN113417_c0_g1	TRINITY_DN113417_c0_g1_i1	APR1_ARATH^APR1_ARATH^Q:2-562,H:285-464^71.809%ID^E:3.64e-90^RecName: Full=5'-adenylylsulfate reductase 1, chloroplastic;^Eukaryota; Viridiplantae; Streptophyta; Embryophyta; Tracheophyta; Spermatophyta; Magnoliophyta; eudicotyledons; Gunneridae; Pentapetalae; rosids; malvids; Brassicales; Brassicaceae; Camelineae; Arabidopsis	.	TRINITY_DN113417_c0_g1_i1|m.37	2-565[+]	APR3_ARATH^APR3_ARATH^Q:1-187,H:277-457^73.262%ID^E:8.86e-99^RecName: Full=5'-adenylylsulfate reductase 3, chloroplastic;^Eukaryota; Viridiplantae; Streptophyta; Embryophyta; Tracheophyta; Spermatophyta; Magnoliophyta; eudicotyledons; Gunneridae; Pentapetalae; rosids; malvids; Brassicales; Brassicaceae; Camelineae; Arabidopsis	PF00085.19^Thioredoxin^Thioredoxin^92-180^E:2.2e-11	.	.	COG0175^Reduction of activated sulfate into sulfite (By similarity)	KEGG:ath:AT4G21990`KO:K05907	GO:0009507^cellular_component^chloroplast`GO:0051539^molecular_function^4 iron, 4 sulfur cluster binding`GO:0033741^molecular_function^adenylyl-sulfate reductase (glutathione) activity`GO:0009973^molecular_function^adenylyl-sulfate reductase activity`GO:0046872^molecular_function^metal ion binding`GO:0004604^molecular_function^phosphoadenylyl-sulfate reductase (thioredoxin) activity`GO:0045454^bi…	GO:0045454^biological_process^cell redox homeostasis	.	.
TRINITY_DN113464_c0_g1	TRINITY_DN113464_c0_g1_i1	BBE8_ARATH^BBE8_ARATH^Q:308-1750,H:45-527^64.609%ID^E:0^RecName: Full=Berberine bridge enzyme-like 8 {ECO:0000303|PubMed:26037923};^Eukaryota; Viridiplantae; Streptophyta; Embryophyta; Tracheophyta; Spermatophyta; Magnoliophyta; eudicotyledons; Gunneridae; Pentapetalae; rosids; malvids; Brassicales; Brassicaceae; Camelineae; Arabidopsis	.	TRINITY_DN113464_c0_g1_i1|m.38	152-1780[+]	BBE8_ARATH^BBE8_ARATH^Q:34-533,H:26-527^64.356%ID^E:0^RecName: Full=Berberine bridge enzyme-like 8 {ECO:0000303|PubMed:26037923};^Eukaryota; Viridiplantae; Streptophyta; Embryophyta; Tracheophyta; Spermatophyta; Magnoliophyta; eudicotyledons; Gunneridae; Pentapetalae; rosids; malvids; Brassicales; Brassicaceae; Camelineae; Arabidopsis	PF01565.22^FAD_binding_4^FAD binding domain^83-219^E:1.4e-26`PF08031.11^BBE^Berberine and berberine like^473-530^E:1.5e-17	.	.	COG0277^FAD linked oxidase domain protein	KEGG:ath:AT1G30700	GO:0005618^cellular_component^cell wall`GO:0005576^cellular_component^extracellular region`GO:0050660^molecular_function^flavin adenine dinucleotide binding`GO:0016614^molecular_function^oxidoreductase activity, acting on CH-OH group of donors	GO:0016491^molecular_function^oxidoreductase activity`GO:0050660^molecular_function^flavin adenine dinucleotide binding`GO:0055114^biological_process^oxidation-reduction process	.	.
TRINITY_DN113464_c0_g1	TRINITY_DN113464_c0_g1_i1	BBE8_ARATH^BBE8_ARATH^Q:308-1750,H:45-527^64.609%ID^E:0^RecName: Full=Berberine bridge enzyme-like 8 {ECO:0000303|PubMed:26037923};^Eukaryota; Viridiplantae; Streptophyta; Embryophyta; Tracheophyta; Spermatophyta; Magnoliophyta; eudicotyledons; Gunneridae; Pentapetalae; rosids; malvids; Brassicales; Brassicaceae; Camelineae; Arabidopsis	.	TRINITY_DN113464_c0_g1_i1|m.39	994-620[-]	.	.	.	.	.	.	.	.	.	.
TRINITY_DN113414_c0_g1	TRINITY_DN113414_c0_g1_i1	CFIS2_ARATH^CFIS2_ARATH^Q:198-797,H:1-200^88.5%ID^E:4.55e-133^RecName: Full=Pre-mRNA cleavage factor Im 25 kDa subunit 2 {ECO:0000303|PubMed:18479511};^Eukaryota; Viridiplantae; Streptophyta; Embryophyta; Tracheophyta; Spermatophyta; Magnoliophyta; eudicotyledons; Gunneridae; Pentapetalae; rosids; malvids; Brassicales; Brassicaceae; Camelineae; Arabidopsis	.	TRINITY_DN113414_c0_g1_i1|m.40	198-800[+]	CFIS2_ARATH^CFIS2_ARATH^Q:1-200,H:1-200^88.5%ID^E:2.03e-136^RecName: Full=Pre-mRNA cleavage factor Im 25 kDa subunit 2 {ECO:0000303|PubMed:18479511};^Eukaryota; Viridiplantae; Streptophyta; Embryophyta; Tracheophyta; Spermatophyta; Magnoliophyta; eudicotyledons; Gunneridae; Pentapetalae; rosids; malvids; Brassicales; Brassicaceae; Camelineae; Arabidopsis	PF13869.5^NUDIX_2^Nucleotide hydrolase^6-193^E:2.5e-83	.	.	ENOG410XS8Z^cleavage and polyadenylation specificity factor	KEGG:ath:AT4G25550`KO:K14397	GO:0005849^cellular_component^mRNA cleavage factor complex`GO:0016787^molecular_function^hydrolase activity`GO:0046872^molecular_function^metal ion binding`GO:0003729^molecular_function^mRNA binding`GO:0006378^biological_process^mRNA polyadenylation	GO:0003729^molecular_function^mRNA binding`GO:0006378^biological_process^mRNA polyadenylation`GO:0005849^cellular_component^mRNA cleavage factor complex	.	.
TRINITY_DN113485_c0_g1	TRINITY_DN113485_c0_g1_i1	.	.	.	.	.	.	.	.	.	.	.	.	.	.
TRINITY_DN113454_c0_g1	TRINITY_DN113454_c0_g1_i1	.	.	.	.	.	.	.	.	.	.	.	.	.	.
TRINITY_DN113441_c0_g1	TRINITY_DN113441_c0_g1_i1	.	.	.	.	.	.	.	.	.	.	.	.	.	.
TRINITY_DN113455_c0_g1	TRINITY_DN113455_c0_g1_i1	KCS6_ARATH^KCS6_ARATH^Q:2-415,H:360-497^87.681%ID^E:1.03e-87^RecName: Full=3-ketoacyl-CoA synthase 6 {ECO:0000303|PubMed:18465198};^Eukaryota; Viridiplantae; Streptophyta; Embryophyta; Tracheophyta; Spermatophyta; Magnoliophyta; eudicotyledons; Gunneridae; Pentapetalae; rosids; malvids; Brassicales; Brassicaceae; Camelineae; Arabidopsis	.	TRINITY_DN113455_c0_g1_i1|m.41	2-418[+]	KCS6_ARATH^KCS6_ARATH^Q:1-138,H:360-497^87.681%ID^E:3.5e-88^RecName: Full=3-ketoacyl-CoA synthase 6 {ECO:0000303|PubMed:18465198};^Eukaryota; Viridiplantae; Streptophyta; Embryophyta; Tracheophyta; Spermatophyta; Magnoliophyta; eudicotyledons; Gunneridae; Pentapetalae; rosids; malvids; Brassicales; Brassicaceae; Camelineae; Arabidopsis	PF08541.9^ACP_syn_III_C^3-Oxoacyl-[acyl-carrier-protein (ACP)] synthase III C terminal^26-108^E:2.5e-13`PF02797.14^Chal_sti_synt_C^Chalcone and stilbene synthases, C-terminal domain^30-103^E:1.4e-10	.	.	ENOG410Y5VH^3-ketoacyl-coa synthase	KEGG:ath:AT1G68530`KO:K15397	GO:0005783^cellular_component^endoplasmic reticulum`GO:0005789^cellular_component^endoplasmic reticulum membrane`GO:0016021^cellular_component^integral component of membrane`GO:0102336^molecular_function^3-oxo-arachidoyl-CoA synthase activity`GO:0102337^molecular_function^3-oxo-cerotoyl-CoA synthase activity`GO:0102338^molecular_function^3-oxo-lignoceronyl-CoA synthase activity`GO:0102756^molecul…	.	.	.
TRINITY_DN113457_c0_g1	TRINITY_DN113457_c0_g1_i1	.	.	.	.	.	.	.	.	.	.	.	.	.	.
TRINITY_DN113407_c0_g1	TRINITY_DN113407_c0_g1_i1	GCT21_ARATH^GCT21_ARATH^Q:419-511,H:1-31^77.419%ID^E:2.97e-12^RecName: Full=Gamma-glutamylcyclotransferase 2-1 {ECO:0000305};^Eukaryota; Viridiplantae; Streptophyta; Embryophyta; Tracheophyta; Spermatophyta; Magnoliophyta; eudicotyledons; Gunneridae; Pentapetalae; rosids; malvids; Brassicales; Brassicaceae; Camelineae; Arabidopsis	.	.	.	.	.	.	.	COG3703^cation transport	KEGG:ath:AT5G26220	GO:0005737^cellular_component^cytoplasm`GO:0003839^molecular_function^gamma-glutamylcyclotransferase activity`GO:0006751^biological_process^glutathione catabolic process`GO:0046686^biological_process^response to cadmium ion`GO:0010288^biological_process^response to lead ion	.	.	.
TRINITY_DN113407_c1_g1	TRINITY_DN113407_c1_g1_i1	.	.	.	.	.	.	.	.	.	.	.	.	.	.
TRINITY_DN113440_c0_g1	TRINITY_DN113440_c0_g1_i1	.	.	.	.	.	.	.	.	.	.	.	.	.	.
TRINITY_DN113433_c0_g1	TRINITY_DN113433_c0_g1_i1	TPC11_HUMAN^TPC11_HUMAN^Q:282-1640,H:79-519^29.299%ID^E:2.52e-34^RecName: Full=Trafficking protein particle complex subunit 11;^Eukaryota; Metazoa; Chordata; Craniata; Vertebrata; Euteleostomi; Mammalia; Eutheria; Euarchontoglires; Primates; Haplorrhini; Catarrhini; Hominidae; Homo`TPC11_HUMAN^TPC11_HUMAN^Q:3060-3593,H:953-1126^25.543%ID^E:1.58e-07^RecName: Full=Trafficking protein particle compl…	.	TRINITY_DN113433_c0_g1_i1|m.42	3-3632[+]	TPC11_BOVIN^TPC11_BOVIN^Q:91-1197,H:76-1126^23.484%ID^E:1.73e-49^RecName: Full=Trafficking protein particle complex subunit 11;^Eukaryota; Metazoa; Chordata; Craniata; Vertebrata; Euteleostomi; Mammalia; Eutheria; Laurasiatheria; Cetartiodactyla; Ruminantia; Pecora; Bovidae; Bovinae; Bos	PF11817.7^Foie-gras_1^Foie gras liver health family 1^279-547^E:3.7e-70	.	.	ENOG410XSTE^trafficking protein particle complex	KEGG:bta:537211`KO:K20308	GO:0005794^cellular_component^Golgi apparatus`GO:0016192^biological_process^vesicle-mediated transport	.	.	.
TRINITY_DN113496_c0_g1	TRINITY_DN113496_c0_g1_i1	.	.	.	.	.	.	.	.	.	.	.	.	.	.
TRINITY_DN113415_c0_g1	TRINITY_DN113415_c0_g1_i1	.	.	TRINITY_DN113415_c0_g1_i1|m.43	123-491[+]	.	.	.	.	.	.	.	.	.	.
TRINITY_DN113498_c0_g1	TRINITY_DN113498_c0_g1_i1	.	.	.	.	.	.	.	.	.	.	.	.	.	.
TRINITY_DN113498_c0_g2	TRINITY_DN113498_c0_g2_i1	.	.	TRINITY_DN113498_c0_g2_i1|m.44	231-626[+]	.	.	.	.	.	.	.	.	.	.
TRINITY_DN113420_c0_g1	TRINITY_DN113420_c0_g1_i1	.	.	.	.	.	.	.	.	.	.	.	.	.	.
TRINITY_DN113478_c0_g1	TRINITY_DN113478_c0_g1_i1	.	.	.	.	.	.	.	.	.	.	.	.	.	.
TRINITY_DN113405_c0_g1	TRINITY_DN113405_c0_g1_i1	.	.	TRINITY_DN113405_c0_g1_i1|m.45	2-325[+]	.	.	.	.	.	.	.	.	.	.
TRINITY_DN113442_c0_g1	TRINITY_DN113442_c0_g1_i1	EIN3_ARATH^EIN3_ARATH^Q:3-476,H:292-452^51.852%ID^E:1.92e-42^RecName: Full=Protein ETHYLENE INSENSITIVE 3;^Eukaryota; Viridiplantae; Streptophyta; Embryophyta; Tracheophyta; Spermatophyta; Magnoliophyta; eudicotyledons; Gunneridae; Pentapetalae; rosids; malvids; Brassicales; Brassicaceae; Camelineae; Arabidopsis	.	TRINITY_DN113442_c0_g1_i1|m.46	3-476[+]	EIN3_ARATH^EIN3_ARATH^Q:1-158,H:292-452^51.852%ID^E:5.96e-48^RecName: Full=Protein ETHYLENE INSENSITIVE 3;^Eukaryota; Viridiplantae; Streptophyta; Embryophyta; Tracheophyta; Spermatophyta; Magnoliophyta; eudicotyledons; Gunneridae; Pentapetalae; rosids; malvids; Brassicales; Brassicaceae; Camelineae; Arabidopsis	.	.	.	ENOG4110EBS^protein ethylene insensitive	KEGG:ath:AT3G20770`KO:K14514	GO:0005634^cellular_component^nucleus`GO:0003700^molecular_function^DNA binding transcription factor activity`GO:0044212^molecular_function^transcription regulatory region DNA binding`GO:0000976^molecular_function^transcription regulatory region sequence-specific DNA binding`GO:0071281^biological_process^cellular response to iron ion`GO:0042742^biological_process^defense response to bacterium`GO:…	.	.	.
TRINITY_DN113442_c0_g1	TRINITY_DN113442_c0_g1_i1	EIN3_ARATH^EIN3_ARATH^Q:3-476,H:292-452^51.852%ID^E:1.92e-42^RecName: Full=Protein ETHYLENE INSENSITIVE 3;^Eukaryota; Viridiplantae; Streptophyta; Embryophyta; Tracheophyta; Spermatophyta; Magnoliophyta; eudicotyledons; Gunneridae; Pentapetalae; rosids; malvids; Brassicales; Brassicaceae; Camelineae; Arabidopsis	.	TRINITY_DN113442_c0_g1_i1|m.47	389-60[-]	.	.	.	ExpAA=22.20^PredHel=1^Topology=o77-99i	.	.	.	.	.	.
TRINITY_DN113439_c0_g1	TRINITY_DN113439_c0_g1_i1	SAP18_ARATH^SAP18_ARATH^Q:43-396,H:33-151^78.333%ID^E:2.27e-59^RecName: Full=Histone deacetylase complex subunit SAP18;^Eukaryota; Viridiplantae; Streptophyta; Embryophyta; Tracheophyta; Spermatophyta; Magnoliophyta; eudicotyledons; Gunneridae; Pentapetalae; rosids; malvids; Brassicales; Brassicaceae; Camelineae; Arabidopsis	.	TRINITY_DN113439_c0_g1_i1|m.48	1-402[+]	SAP18_ARATH^SAP18_ARATH^Q:7-132,H:25-151^77.344%ID^E:1.42e-63^RecName: Full=Histone deacetylase complex subunit SAP18;^Eukaryota; Viridiplantae; Streptophyta; Embryophyta; Tracheophyta; Spermatophyta; Magnoliophyta; eudicotyledons; Gunneridae; Pentapetalae; rosids; malvids; Brassicales; Brassicaceae; Camelineae; Arabidopsis	PF06487.11^SAP18^Sin3 associated polypeptide p18 (SAP18)^14-132^E:3.4e-40	.	.	ENOG4111FBB^histone deacetylase complex subunit	KEGG:ath:AT2G45640`KO:K14324	GO:0005730^cellular_component^nucleolus`GO:0006355^biological_process^regulation of transcription, DNA-templated`GO:0009737^biological_process^response to abscisic acid`GO:0009651^biological_process^response to salt stress`GO:0006351^biological_process^transcription, DNA-templated	.	.	.
TRINITY_DN113459_c0_g1	TRINITY_DN113459_c0_g1_i1	.	.	TRINITY_DN113459_c0_g1_i1|m.49	518-1000[+]	PSRP5_PEA^PSRP5_PEA^Q:35-160,H:26-145^50.394%ID^E:3.07e-27^RecName: Full=50S ribosomal protein 5, chloroplastic;^Eukaryota; Viridiplantae; Streptophyta; Embryophyta; Tracheophyta; Spermatophyta; Magnoliophyta; eudicotyledons; Gunneridae; Pentapetalae; rosids; fabids; Fabales; Fabaceae; Papilionoideae; Fabeae; Pisum	.	.	.	.	.	GO:0009507^cellular_component^chloroplast`GO:0005840^cellular_component^ribosome	.	.	.
TRINITY_DN113451_c0_g1	TRINITY_DN113451_c0_g1_i1	PBL7_ARATH^PBL7_ARATH^Q:187-1254,H:1-364^79.235%ID^E:0^RecName: Full=Probable serine/threonine-protein kinase PBL7 {ECO:0000305};^Eukaryota; Viridiplantae; Streptophyta; Embryophyta; Tracheophyta; Spermatophyta; Magnoliophyta; eudicotyledons; Gunneridae; Pentapetalae; rosids; malvids; Brassicales; Brassicaceae; Camelineae; Arabidopsis	.	TRINITY_DN113451_c0_g1_i1|m.50	187-1299[+]	PBL7_ARATH^PBL7_ARATH^Q:1-368,H:1-377^78.249%ID^E:0^RecName: Full=Probable serine/threonine-protein kinase PBL7 {ECO:0000305};^Eukaryota; Viridiplantae; Streptophyta; Embryophyta; Tracheophyta; Spermatophyta; Magnoliophyta; eudicotyledons; Gunneridae; Pentapetalae; rosids; malvids; Brassicales; Brassicaceae; Camelineae; Arabidopsis	PF00069.24^Pkinase^Protein kinase domain^70-335^E:2.3e-47`PF07714.16^Pkinase_Tyr^Protein tyrosine kinase^70-337^E:8.2e-47	.	.	COG0515^Serine Threonine protein kinase	KEGG:ath:AT5G02800	GO:0005886^cellular_component^plasma membrane`GO:0005524^molecular_function^ATP binding`GO:0004675^molecular_function^transmembrane receptor protein serine/threonine kinase activity`GO:0009742^biological_process^brassinosteroid mediated signaling pathway`GO:0007166^biological_process^cell surface receptor signaling pathway`GO:1900459^biological_process^positive regulation of brassinosteroid media…	GO:0004672^molecular_function^protein kinase activity`GO:0005524^molecular_function^ATP binding`GO:0006468^biological_process^protein phosphorylation	.	.
TRINITY_DN113435_c0_g1	TRINITY_DN113435_c0_g1_i1	APR1_ARATH^APR1_ARATH^Q:2-214,H:392-462^80.282%ID^E:1.84e-30^RecName: Full=5'-adenylylsulfate reductase 1, chloroplastic;^Eukaryota; Viridiplantae; Streptophyta; Embryophyta; Tracheophyta; Spermatophyta; Magnoliophyta; eudicotyledons; Gunneridae; Pentapetalae; rosids; malvids; Brassicales; Brassicaceae; Camelineae; Arabidopsis	.	.	.	.	.	.	.	COG0175^Reduction of activated sulfate into sulfite (By similarity)	KEGG:ath:AT4G04610`KO:K05907	GO:0009507^cellular_component^chloroplast`GO:0009570^cellular_component^chloroplast stroma`GO:0009536^cellular_component^plastid`GO:0051539^molecular_function^4 iron, 4 sulfur cluster binding`GO:0033741^molecular_function^adenylyl-sulfate reductase (glutathione) activity`GO:0009973^molecular_function^adenylyl-sulfate reductase activity`GO:0046872^molecular_function^metal ion binding`GO:0004604^mo…	.	.	.
TRINITY_DN113428_c0_g1	TRINITY_DN113428_c0_g1_i1	LBD38_ARATH^LBD38_ARATH^Q:46-444,H:62-204^48.252%ID^E:2.86e-31^RecName: Full=LOB domain-containing protein 38;^Eukaryota; Viridiplantae; Streptophyta; Embryophyta; Tracheophyta; Spermatophyta; Magnoliophyta; eudicotyledons; Gunneridae; Pentapetalae; rosids; malvids; Brassicales; Brassicaceae; Camelineae; Arabidopsis	.	TRINITY_DN113428_c0_g1_i1|m.51	1-468[+]	LBD38_ARATH^LBD38_ARATH^Q:16-148,H:62-204^48.649%ID^E:3.03e-33^RecName: Full=LOB domain-containing protein 38;^Eukaryota; Viridiplantae; Streptophyta; Embryophyta; Tracheophyta; Spermatophyta; Magnoliophyta; eudicotyledons; Gunneridae; Pentapetalae; rosids; malvids; Brassicales; Brassicaceae; Camelineae; Arabidopsis	PF03195.13^LOB^Lateral organ boundaries (LOB) domain^16-55^E:1.7e-06	sigP:1^16^0.815^YES	ExpAA=17.61^PredHel=1^Topology=o4-23i	ENOG4111JGS^lob domain-containing protein	KEGG:ath:AT3G49940	.	.	.	.
TRINITY_DN113428_c0_g1	TRINITY_DN113428_c0_g1_i1	LBD38_ARATH^LBD38_ARATH^Q:46-444,H:62-204^48.252%ID^E:2.86e-31^RecName: Full=LOB domain-containing protein 38;^Eukaryota; Viridiplantae; Streptophyta; Embryophyta; Tracheophyta; Spermatophyta; Magnoliophyta; eudicotyledons; Gunneridae; Pentapetalae; rosids; malvids; Brassicales; Brassicaceae; Camelineae; Arabidopsis	.	TRINITY_DN113428_c0_g1_i1|m.52	101-403[+]	.	.	.	.	.	.	.	.	.	.
TRINITY_DN113428_c0_g2	TRINITY_DN113428_c0_g2_i1	LBD37_ARATH^LBD37_ARATH^Q:2-493,H:39-213^54.857%ID^E:2.88e-47^RecName: Full=LOB domain-containing protein 37;^Eukaryota; Viridiplantae; Streptophyta; Embryophyta; Tracheophyta; Spermatophyta; Magnoliophyta; eudicotyledons; Gunneridae; Pentapetalae; rosids; malvids; Brassicales; Brassicaceae; Camelineae; Arabidopsis	.	TRINITY_DN113428_c0_g2_i1|m.53	2-493[+]	LBD38_ARATH^LBD38_ARATH^Q:1-156,H:39-204^55.233%ID^E:5.12e-49^RecName: Full=LOB domain-containing protein 38;^Eukaryota; Viridiplantae; Streptophyta; Embryophyta; Tracheophyta; Spermatophyta; Magnoliophyta; eudicotyledons; Gunneridae; Pentapetalae; rosids; malvids; Brassicales; Brassicaceae; Camelineae; Arabidopsis	PF03195.13^LOB^Lateral organ boundaries (LOB) domain^1-63^E:8.8e-14	.	.	ENOG4111JGS^lob domain-containing protein	KEGG:ath:AT3G49940	.	.	.	.
TRINITY_DN113428_c0_g2	TRINITY_DN113428_c0_g2_i1	LBD37_ARATH^LBD37_ARATH^Q:2-493,H:39-213^54.857%ID^E:2.88e-47^RecName: Full=LOB domain-containing protein 37;^Eukaryota; Viridiplantae; Streptophyta; Embryophyta; Tracheophyta; Spermatophyta; Magnoliophyta; eudicotyledons; Gunneridae; Pentapetalae; rosids; malvids; Brassicales; Brassicaceae; Camelineae; Arabidopsis	.	TRINITY_DN113428_c0_g2_i1|m.54	126-428[+]	.	.	.	.	.	.	.	.	.	.
TRINITY_DN113443_c0_g1	TRINITY_DN113443_c0_g1_i1	.	.	.	.	.	.	.	.	.	.	.	.	.	.
TRINITY_DN113448_c0_g1	TRINITY_DN113448_c0_g1_i1	UXS5_ARATH^UXS5_ARATH^Q:3-539,H:160-338^90.503%ID^E:1.29e-118^RecName: Full=UDP-glucuronic acid decarboxylase 5;^Eukaryota; Viridiplantae; Streptophyta; Embryophyta; Tracheophyta; Spermatophyta; Magnoliophyta; eudicotyledons; Gunneridae; Pentapetalae; rosids; malvids; Brassicales; Brassicaceae; Camelineae; Arabidopsis	.	TRINITY_DN113448_c0_g1_i1|m.55	3-554[+]	UXS5_ARATH^UXS5_ARATH^Q:1-179,H:160-338^90.503%ID^E:8.06e-120^RecName: Full=UDP-glucuronic acid decarboxylase 5;^Eukaryota; Viridiplantae; Streptophyta; Embryophyta; Tracheophyta; Spermatophyta; Magnoliophyta; eudicotyledons; Gunneridae; Pentapetalae; rosids; malvids; Brassicales; Brassicaceae; Camelineae; Arabidopsis	PF16363.4^GDP_Man_Dehyd^GDP-mannose 4,6 dehydratase^5-169^E:1.9e-24`PF01370.20^Epimerase^NAD dependent epimerase/dehydratase family^6-106^E:7.1e-20	.	.	COG0451^Nad-dependent epimerase dehydratase	KEGG:ath:AT3G46440`KO:K08678	GO:0005829^cellular_component^cytosol`GO:0070403^molecular_function^NAD+ binding`GO:0048040^molecular_function^UDP-glucuronate decarboxylase activity`GO:0042732^biological_process^D-xylose metabolic process`GO:0033320^biological_process^UDP-D-xylose biosynthetic process	GO:0003824^molecular_function^catalytic activity`GO:0050662^molecular_function^coenzyme binding	.	.
TRINITY_DN113490_c0_g1	TRINITY_DN113490_c0_g1_i2	.	.	TRINITY_DN113490_c0_g1_i2|m.56	3-377[+]	.	.	.	ExpAA=36.44^PredHel=2^Topology=i21-43o63-85i	.	.	.	.	.	.
TRINITY_DN113452_c0_g1	TRINITY_DN113452_c0_g1_i3	.	.	TRINITY_DN113452_c0_g1_i3|m.57	440-793[+]	.	.	.	.	.	.	.	.	.	.
TRINITY_DN113452_c0_g1	TRINITY_DN113452_c0_g1_i3	.	.	TRINITY_DN113452_c0_g1_i3|m.58	588-277[-]	.	.	.	ExpAA=22.64^PredHel=1^Topology=o30-52i	.	.	.	.	.	.
TRINITY_DN113425_c0_g1	TRINITY_DN113425_c0_g1_i1	IRX9_ARATH^IRX9_ARATH^Q:186-1196,H:1-339^62.865%ID^E:2.02e-154^RecName: Full=Probable beta-1,4-xylosyltransferase IRX9;^Eukaryota; Viridiplantae; Streptophyta; Embryophyta; Tracheophyta; Spermatophyta; Magnoliophyta; eudicotyledons; Gunneridae; Pentapetalae; rosids; malvids; Brassicales; Brassicaceae; Camelineae; Arabidopsis	.	TRINITY_DN113425_c0_g1_i1|m.59	186-1229[+]	IRX9_ARATH^IRX9_ARATH^Q:1-344,H:1-346^63.037%ID^E:3.61e-160^RecName: Full=Probable beta-1,4-xylosyltransferase IRX9;^Eukaryota; Viridiplantae; Streptophyta; Embryophyta; Tracheophyta; Spermatophyta; Magnoliophyta; eudicotyledons; Gunneridae; Pentapetalae; rosids; malvids; Brassicales; Brassicaceae; Camelineae; Arabidopsis	PF03360.15^Glyco_transf_43^Glycosyltransferase family 43^134-340^E:3.7e-59	.	ExpAA=21.00^PredHel=1^Topology=i21-43o	ENOG410XP79^glucuronosyltransferase	KEGG:ath:AT2G37090`KO:K20869	GO:0005794^cellular_component^Golgi apparatus`GO:0000139^cellular_component^Golgi membrane`GO:0016021^cellular_component^integral component of membrane`GO:0015018^molecular_function^galactosylgalactosylxylosylprotein 3-beta-glucuronosyltransferase activity`GO:0042285^molecular_function^xylosyltransferase activity`GO:0071555^biological_process^cell wall organization`GO:0010417^biological_process^g…	GO:0015018^molecular_function^galactosylgalactosylxylosylprotein 3-beta-glucuronosyltransferase activity`GO:0016020^cellular_component^membrane	.	.
TRINITY_DN113425_c0_g1	TRINITY_DN113425_c0_g1_i1	IRX9_ARATH^IRX9_ARATH^Q:186-1196,H:1-339^62.865%ID^E:2.02e-154^RecName: Full=Probable beta-1,4-xylosyltransferase IRX9;^Eukaryota; Viridiplantae; Streptophyta; Embryophyta; Tracheophyta; Spermatophyta; Magnoliophyta; eudicotyledons; Gunneridae; Pentapetalae; rosids; malvids; Brassicales; Brassicaceae; Camelineae; Arabidopsis	.	TRINITY_DN113425_c0_g1_i1|m.60	965-663[-]	.	.	.	.	.	.	.	.	.	.
TRINITY_DN113402_c0_g1	TRINITY_DN113402_c0_g1_i1	.	.	.	.	.	.	.	.	.	.	.	.	.	.
TRINITY_DN113486_c0_g1	TRINITY_DN113486_c0_g1_i1	.	.	.	.	.	.	.	.	.	.	.	.	.	.
TRINITY_DN113469_c1_g2	TRINITY_DN113469_c1_g2_i1	.	.	TRINITY_DN113469_c1_g2_i1|m.61	512-937[+]	.	.	.	.	.	.	.	.	.	.
TRINITY_DN113427_c0_g1	TRINITY_DN113427_c0_g1_i1	.	.	.	.	.	.	.	.	.	.	.	.	.	.
TRINITY_DN113480_c0_g1	TRINITY_DN113480_c0_g1_i1	.	.	.	.	.	.	.	.	.	.	.	.	.	.
TRINITY_DN113453_c0_g1	TRINITY_DN113453_c0_g1_i1	PR1B4_ARATH^PR1B4_ARATH^Q:440-952,H:36-206^76.608%ID^E:3.16e-62^RecName: Full=PRA1 family protein B4;^Eukaryota; Viridiplantae; Streptophyta; Embryophyta; Tracheophyta; Spermatophyta; Magnoliophyta; eudicotyledons; Gunneridae; Pentapetalae; rosids; malvids; Brassicales; Brassicaceae; Camelineae; Arabidopsis	.	TRINITY_DN113453_c0_g1_i1|m.62	323-997[+]	PR1B4_ARATH^PR1B4_ARATH^Q:1-224,H:1-220^70.536%ID^E:3.26e-112^RecName: Full=PRA1 family protein B4;^Eukaryota; Viridiplantae; Streptophyta; Embryophyta; Tracheophyta; Spermatophyta; Magnoliophyta; eudicotyledons; Gunneridae; Pentapetalae; rosids; malvids; Brassicales; Brassicaceae; Camelineae; Arabidopsis	PF03208.18^PRA1^PRA1 family protein^55-197^E:1.1e-49	.	ExpAA=80.89^PredHel=4^Topology=i90-107o111-129i149-180o200-222i	COG5130^Prenylated RAB acceptor	KEGG:ath:AT2G38360`KO:K20359	GO:0005829^cellular_component^cytosol`GO:0005783^cellular_component^endoplasmic reticulum`GO:0005768^cellular_component^endosome`GO:0010008^cellular_component^endosome membrane`GO:0005794^cellular_component^Golgi apparatus`GO:0016021^cellular_component^integral component of membrane`GO:0005802^cellular_component^trans-Golgi network`GO:0016192^biological_process^vesicle-mediated transport	.	.	.
TRINITY_DN113431_c0_g1	TRINITY_DN113431_c0_g1_i2	.	.	.	.	.	.	.	.	.	.	.	.	.	.
TRINITY_DN113474_c0_g2	TRINITY_DN113474_c0_g2_i1	STN1_ARATH^STN1_ARATH^Q:435-917,H:1-156^54.938%ID^E:1.41e-51^RecName: Full=CST complex subunit STN1 {ECO:0000303|PubMed:19064932};^Eukaryota; Viridiplantae; Streptophyta; Embryophyta; Tracheophyta; Spermatophyta; Magnoliophyta; eudicotyledons; Gunneridae; Pentapetalae; rosids; malvids; Brassicales; Brassicaceae; Camelineae; Arabidopsis	.	TRINITY_DN113474_c0_g2_i1|m.63	435-971[+]	STN1_ARATH^STN1_ARATH^Q:1-161,H:1-156^54.938%ID^E:5.45e-54^RecName: Full=CST complex subunit STN1 {ECO:0000303|PubMed:19064932};^Eukaryota; Viridiplantae; Streptophyta; Embryophyta; Tracheophyta; Spermatophyta; Magnoliophyta; eudicotyledons; Gunneridae; Pentapetalae; rosids; malvids; Brassicales; Brassicaceae; Camelineae; Arabidopsis	PF01336.24^tRNA_anti-codon^OB-fold nucleic acid binding domain^47-137^E:1.5e-09	.	.	ENOG410XYJH^CST complex subunit	KEGG:ath:AT1G07130	GO:0000784^cellular_component^nuclear chromosome, telomeric region`GO:0003677^molecular_function^DNA binding`GO:0016233^biological_process^telomere capping	GO:0003676^molecular_function^nucleic acid binding	.	.
TRINITY_DN113413_c0_g1	TRINITY_DN113413_c0_g1_i1	.	.	.	.	.	.	.	.	.	.	.	.	.	.
TRINITY_DN113422_c0_g1	TRINITY_DN113422_c0_g1_i1	BD31B_ORYSJ^BD31B_ORYSJ^Q:200-634,H:1-145^86.897%ID^E:1.68e-92^RecName: Full=Protein BUD31 homolog 2;^Eukaryota; Viridiplantae; Streptophyta; Embryophyta; Tracheophyta; Spermatophyta; Magnoliophyta; Liliopsida; Poales; Poaceae; BOP clade; Oryzoideae; Oryzeae; Oryzinae; Oryza; Oryza sativa	.	TRINITY_DN113422_c0_g1_i1|m.64	200-637[+]	BD31B_ORYSJ^BD31B_ORYSJ^Q:1-145,H:1-145^86.897%ID^E:3.04e-95^RecName: Full=Protein BUD31 homolog 2;^Eukaryota; Viridiplantae; Streptophyta; Embryophyta; Tracheophyta; Spermatophyta; Magnoliophyta; Liliopsida; Poales; Poaceae; BOP clade; Oryzoideae; Oryzeae; Oryzinae; Oryza; Oryza sativa	PF01125.16^G10^G10 protein^1-143^E:3.8e-63	.	.	COG5132^BUD31 homolog	KEGG:osa:4338942`KO:K12873	GO:0005681^cellular_component^spliceosomal complex`GO:0000398^biological_process^mRNA splicing, via spliceosome	GO:0005634^cellular_component^nucleus	.	.
TRINITY_DN113410_c0_g1	TRINITY_DN113410_c0_g1_i1	.	.	.	.	.	.	.	.	.	.	.	.	.	.
TRINITY_DN113430_c0_g1	TRINITY_DN113430_c0_g1_i1	.	.	.	.	.	.	.	.	.	.	.	.	.	.
TRINITY_DN113432_c0_g1	TRINITY_DN113432_c0_g1_i1	.	.	.	.	.	.	.	.	.	.	.	.	.	.
TRINITY_DN113481_c0_g1	TRINITY_DN113481_c0_g1_i1	.	.	TRINITY_DN113481_c0_g1_i1|m.65	2-445[+]	.	.	.	ExpAA=22.35^PredHel=1^Topology=i122-144o	.	.	.	.	.	.
TRINITY_DN113421_c0_g2	TRINITY_DN113421_c0_g2_i1	GRP2_NICSY^GRP2_NICSY^Q:207-416,H:6-75^72.857%ID^E:5.66e-29^RecName: Full=Glycine-rich protein 2;^Eukaryota; Viridiplantae; Streptophyta; Embryophyta; Tracheophyta; Spermatophyta; Magnoliophyta; eudicotyledons; Gunneridae; Pentapetalae; asterids; lamiids; Solanales; Solanaceae; Nicotianoideae; Nicotianeae; Nicotiana	.	TRINITY_DN113421_c0_g2_i1|m.66	419-3[-]	.	.	.	ExpAA=25.31^PredHel=1^Topology=o100-122i	.	.	.	.	.	.
TRINITY_DN113463_c0_g1	TRINITY_DN113463_c0_g1_i1	NDUB2_ARATH^NDUB2_ARATH^Q:12-140,H:15-57^46.512%ID^E:2.18e-09^RecName: Full=NADH dehydrogenase [ubiquinone] 1 beta subcomplex subunit 2;^Eukaryota; Viridiplantae; Streptophyta; Embryophyta; Tracheophyta; Spermatophyta; Magnoliophyta; eudicotyledons; Gunneridae; Pentapetalae; rosids; malvids; Brassicales; Brassicaceae; Camelineae; Arabidopsis	.	.	.	.	.	.	.	ENOG410ZNIE^NA	KEGG:ath:AT1G76200	GO:0005747^cellular_component^mitochondrial respiratory chain complex I`GO:0055114^biological_process^oxidation-reduction process	.	.	.
TRINITY_DN113475_c0_g1	TRINITY_DN113475_c0_g1_i1	G3PA1_ARATH^G3PA1_ARATH^Q:630-689,H:61-80^100%ID^E:1.75e-06^RecName: Full=Glyceraldehyde-3-phosphate dehydrogenase GAPA1, chloroplastic;^Eukaryota; Viridiplantae; Streptophyta; Embryophyta; Tracheophyta; Spermatophyta; Magnoliophyta; eudicotyledons; Gunneridae; Pentapetalae; rosids; malvids; Brassicales; Brassicaceae; Camelineae; Arabidopsis	.	.	.	.	.	.	.	COG0057^glyceraldehyde3phosphate dehydrogenase	KEGG:ath:AT3G26650`KO:K05298	GO:0048046^cellular_component^apoplast`GO:0009507^cellular_component^chloroplast`GO:0009941^cellular_component^chloroplast envelope`GO:0031969^cellular_component^chloroplast membrane`GO:0009570^cellular_component^chloroplast stroma`GO:0009535^cellular_component^chloroplast thylakoid membrane`GO:0016020^cellular_component^membrane`GO:0010319^cellular_component^stromule`GO:0099080^cellular_componen…	.	.	.
TRINITY_DN113436_c0_g1	TRINITY_DN113436_c0_g1_i1	RK18_SPIOL^RK18_SPIOL^Q:190-594,H:35-166^82.222%ID^E:6.37e-70^RecName: Full=50S ribosomal protein L18, chloroplastic {ECO:0000303|PubMed:10874046};^Eukaryota; Viridiplantae; Streptophyta; Embryophyta; Tracheophyta; Spermatophyta; Magnoliophyta; eudicotyledons; Gunneridae; Pentapetalae; Caryophyllales; Chenopodiaceae; Chenopodioideae; Anserineae; Spinacia	.	TRINITY_DN113436_c0_g1_i1|m.67	2164-1337[-]	YIPF6_XENTR^YIPF6_XENTR^Q:89-275,H:38-230^38.579%ID^E:6.94e-36^RecName: Full=Protein YIPF6;^Eukaryota; Metazoa; Chordata; Craniata; Vertebrata; Euteleostomi; Amphibia; Batrachia; Anura; Pipoidea; Pipidae; Xenopodinae; Xenopus; Silurana	PF04893.16^Yip1^Yip1 domain^129-256^E:4.6e-13	.	ExpAA=107.50^PredHel=5^Topology=o140-162i167-189o193-215i222-244o254-273i	COG5080^yip1 domain family member	KEGG:xtr:548686	GO:0005797^cellular_component^Golgi medial cisterna`GO:0000138^cellular_component^Golgi trans cisterna`GO:0016021^cellular_component^integral component of membrane`GO:0005802^cellular_component^trans-Golgi network	GO:0016020^cellular_component^membrane	.	.
TRINITY_DN113436_c0_g1	TRINITY_DN113436_c0_g1_i1	RK18_SPIOL^RK18_SPIOL^Q:190-594,H:35-166^82.222%ID^E:6.37e-70^RecName: Full=50S ribosomal protein L18, chloroplastic {ECO:0000303|PubMed:10874046};^Eukaryota; Viridiplantae; Streptophyta; Embryophyta; Tracheophyta; Spermatophyta; Magnoliophyta; eudicotyledons; Gunneridae; Pentapetalae; Caryophyllales; Chenopodiaceae; Chenopodioideae; Anserineae; Spinacia	.	TRINITY_DN113436_c0_g1_i1|m.68	1-597[+]	RK18_SPIOL^RK18_SPIOL^Q:64-198,H:35-166^82.222%ID^E:1.59e-76^RecName: Full=50S ribosomal protein L18, chloroplastic {ECO:0000303|PubMed:10874046};^Eukaryota; Viridiplantae; Streptophyta; Embryophyta; Tracheophyta; Spermatophyta; Magnoliophyta; eudicotyledons; Gunneridae; Pentapetalae; Caryophyllales; Chenopodiaceae; Chenopodioideae; Anserineae; Spinacia	PF00861.21^Ribosomal_L18p^Ribosomal L18 of archaea, bacteria, mitoch. and chloroplast^80-198^E:9.2e-46	.	.	.	.	GO:0009507^cellular_component^chloroplast`GO:0005840^cellular_component^ribosome`GO:0019843^molecular_function^rRNA binding`GO:0003735^molecular_function^structural constituent of ribosome`GO:0006412^biological_process^translation	GO:0003735^molecular_function^structural constituent of ribosome`GO:0006412^biological_process^translation`GO:0005622^cellular_component^intracellular`GO:0005840^cellular_component^ribosome	.	.
TRINITY_DN113436_c0_g1	TRINITY_DN113436_c0_g1_i1	RK18_SPIOL^RK18_SPIOL^Q:190-594,H:35-166^82.222%ID^E:6.37e-70^RecName: Full=50S ribosomal protein L18, chloroplastic {ECO:0000303|PubMed:10874046};^Eukaryota; Viridiplantae; Streptophyta; Embryophyta; Tracheophyta; Spermatophyta; Magnoliophyta; eudicotyledons; Gunneridae; Pentapetalae; Caryophyllales; Chenopodiaceae; Chenopodioideae; Anserineae; Spinacia	.	TRINITY_DN113436_c0_g1_i1|m.69	2283-1861[-]	.	.	.	.	.	.	.	.	.	.
TRINITY_DN113436_c0_g1	TRINITY_DN113436_c0_g1_i1	RK18_SPIOL^RK18_SPIOL^Q:190-594,H:35-166^82.222%ID^E:6.37e-70^RecName: Full=50S ribosomal protein L18, chloroplastic {ECO:0000303|PubMed:10874046};^Eukaryota; Viridiplantae; Streptophyta; Embryophyta; Tracheophyta; Spermatophyta; Magnoliophyta; eudicotyledons; Gunneridae; Pentapetalae; Caryophyllales; Chenopodiaceae; Chenopodioideae; Anserineae; Spinacia	.	TRINITY_DN113436_c0_g1_i1|m.70	1161-787[-]	.	.	.	.	.	.	.	.	.	.
TRINITY_DN113476_c0_g1	TRINITY_DN113476_c0_g1_i1	.	.	TRINITY_DN113476_c0_g1_i1|m.71	3-2033[+]	.	.	sigP:1^19^0.464^YES	.	.	.	.	.	.	.
TRINITY_DN113476_c0_g1	TRINITY_DN113476_c0_g1_i1	.	.	TRINITY_DN113476_c0_g1_i1|m.72	632-18[-]	.	.	.	ExpAA=52.09^PredHel=2^Topology=i77-99o155-177i	.	.	.	.	.	.
TRINITY_DN113476_c0_g1	TRINITY_DN113476_c0_g1_i1	.	.	TRINITY_DN113476_c0_g1_i1|m.73	157-543[+]	.	.	.	.	.	.	.	.	.	.
TRINITY_DN123692_c0_g1	TRINITY_DN123692_c0_g1_i1	.	.	TRINITY_DN123692_c0_g1_i1|m.74	105-425[+]	ATL16_ARATH^ATL16_ARATH^Q:13-107,H:35-158^26.4%ID^E:2.39e-06^RecName: Full=RING-H2 finger protein ATL16;^Eukaryota; Viridiplantae; Streptophyta; Embryophyta; Tracheophyta; Spermatophyta; Magnoliophyta; eudicotyledons; Gunneridae; Pentapetalae; rosids; malvids; Brassicales; Brassicaceae; Camelineae; Arabidopsis	.	.	ExpAA=22.67^PredHel=1^Topology=o13-35i	ENOG41121N2^zinc ion binding	KEGG:ath:AT5G43420	GO:0016021^cellular_component^integral component of membrane`GO:0046872^molecular_function^metal ion binding`GO:0061630^molecular_function^ubiquitin protein ligase activity`GO:0043161^biological_process^proteasome-mediated ubiquitin-dependent protein catabolic process	.	.	.
TRINITY_DN123628_c0_g1	TRINITY_DN123628_c0_g1_i1	C90A1_ARATH^C90A1_ARATH^Q:309-668,H:1-120^68.333%ID^E:1.21e-45^RecName: Full=Cytochrome P450 90A1;^Eukaryota; Viridiplantae; Streptophyta; Embryophyta; Tracheophyta; Spermatophyta; Magnoliophyta; eudicotyledons; Gunneridae; Pentapetalae; rosids; malvids; Brassicales; Brassicaceae; Camelineae; Arabidopsis	.	TRINITY_DN123628_c0_g1_i1|m.75	40-450[+]	.	.	.	.	.	.	.	.	.	.
TRINITY_DN123628_c0_g1	TRINITY_DN123628_c0_g1_i1	C90A1_ARATH^C90A1_ARATH^Q:309-668,H:1-120^68.333%ID^E:1.21e-45^RecName: Full=Cytochrome P450 90A1;^Eukaryota; Viridiplantae; Streptophyta; Embryophyta; Tracheophyta; Spermatophyta; Magnoliophyta; eudicotyledons; Gunneridae; Pentapetalae; rosids; malvids; Brassicales; Brassicaceae; Camelineae; Arabidopsis	.	TRINITY_DN123628_c0_g1_i1|m.76	668-258[-]	.	.	.	.	.	.	.	.	.	.
TRINITY_DN123628_c0_g1	TRINITY_DN123628_c0_g1_i1	C90A1_ARATH^C90A1_ARATH^Q:309-668,H:1-120^68.333%ID^E:1.21e-45^RecName: Full=Cytochrome P450 90A1;^Eukaryota; Viridiplantae; Streptophyta; Embryophyta; Tracheophyta; Spermatophyta; Magnoliophyta; eudicotyledons; Gunneridae; Pentapetalae; rosids; malvids; Brassicales; Brassicaceae; Camelineae; Arabidopsis	.	TRINITY_DN123628_c0_g1_i1|m.77	309-668[+]	C90A1_ARATH^C90A1_ARATH^Q:1-120,H:1-120^68.333%ID^E:2.58e-47^RecName: Full=Cytochrome P450 90A1;^Eukaryota; Viridiplantae; Streptophyta; Embryophyta; Tracheophyta; Spermatophyta; Magnoliophyta; eudicotyledons; Gunneridae; Pentapetalae; rosids; malvids; Brassicales; Brassicaceae; Camelineae; Arabidopsis	PF00067.21^p450^Cytochrome P450^32-106^E:3.1e-06	.	ExpAA=21.50^PredHel=1^Topology=o4-26i	COG2124^Cytochrome p450	KEGG:ath:AT5G05690`KO:K09588	GO:0016021^cellular_component^integral component of membrane`GO:0020037^molecular_function^heme binding`GO:0005506^molecular_function^iron ion binding`GO:0004497^molecular_function^monooxygenase activity`GO:0016705^molecular_function^oxidoreductase activity, acting on paired donors, with incorporation or reduction of molecular oxygen`GO:0048657^biological_process^anther wall tapetum cell differen…	GO:0005506^molecular_function^iron ion binding`GO:0016705^molecular_function^oxidoreductase activity, acting on paired donors, with incorporation or reduction of molecular oxygen`GO:0020037^molecular_function^heme binding`GO:0055114^biological_process^oxidation-reduction process	.	.
TRINITY_DN123634_c0_g1	TRINITY_DN123634_c0_g1_i1	.	.	.	.	.	.	.	.	.	.	.	.	.	.
TRINITY_DN123642_c0_g1	TRINITY_DN123642_c0_g1_i1	.	.	TRINITY_DN123642_c0_g1_i1|m.78	2-313[+]	.	.	.	.	.	.	.	.	.	.
TRINITY_DN123641_c0_g1	TRINITY_DN123641_c0_g1_i1	.	.	.	.	.	.	.	.	.	.	.	.	.	.
TRINITY_DN123618_c0_g1	TRINITY_DN123618_c0_g1_i1	PPA_ASPFI^PPA_ASPFI^Q:1-555,H:122-305^71.505%ID^E:1.56e-83^RecName: Full=Acid phosphatase;^Eukaryota; Fungi; Dikarya; Ascomycota; Pezizomycotina; Eurotiomycetes; Eurotiomycetidae; Eurotiales; Aspergillaceae; Aspergillus	.	TRINITY_DN123618_c0_g1_i1|m.79	1-555[+]	PPA_ASPFI^PPA_ASPFI^Q:1-185,H:122-305^72.581%ID^E:2.07e-93^RecName: Full=Acid phosphatase;^Eukaryota; Fungi; Dikarya; Ascomycota; Pezizomycotina; Eurotiomycetes; Eurotiomycetidae; Eurotiales; Aspergillaceae; Aspergillus	PF16656.4^Pur_ac_phosph_N^Purple acid Phosphatase, N-terminal domain^11-51^E:1.9e-09	.	.	.	.	GO:0005576^cellular_component^extracellular region`GO:0003993^molecular_function^acid phosphatase activity`GO:0046872^molecular_function^metal ion binding	GO:0003993^molecular_function^acid phosphatase activity`GO:0046872^molecular_function^metal ion binding	.	.
TRINITY_DN123618_c0_g1	TRINITY_DN123618_c0_g1_i1	PPA_ASPFI^PPA_ASPFI^Q:1-555,H:122-305^71.505%ID^E:1.56e-83^RecName: Full=Acid phosphatase;^Eukaryota; Fungi; Dikarya; Ascomycota; Pezizomycotina; Eurotiomycetes; Eurotiomycetidae; Eurotiales; Aspergillaceae; Aspergillus	.	TRINITY_DN123618_c0_g1_i1|m.80	556-245[-]	.	.	.	.	.	.	.	.	.	.
TRINITY_DN123630_c0_g1	TRINITY_DN123630_c0_g1_i1	KPYG_TOBAC^KPYG_TOBAC^Q:11-115,H:326-362^64.865%ID^E:1.83e-06^RecName: Full=Pyruvate kinase isozyme G, chloroplastic;^Eukaryota; Viridiplantae; Streptophyta; Embryophyta; Tracheophyta; Spermatophyta; Magnoliophyta; eudicotyledons; Gunneridae; Pentapetalae; asterids; lamiids; Solanales; Solanaceae; Nicotianoideae; Nicotianeae; Nicotiana	.	.	.	.	.	.	.	.	KEGG:nta:107822892`KO:K00873	GO:0009507^cellular_component^chloroplast`GO:0005524^molecular_function^ATP binding`GO:0016301^molecular_function^kinase activity`GO:0000287^molecular_function^magnesium ion binding`GO:0030955^molecular_function^potassium ion binding`GO:0004743^molecular_function^pyruvate kinase activity	.	.	.
TRINITY_DN123609_c0_g1	TRINITY_DN123609_c0_g1_i1	.	.	.	.	.	.	.	.	.	.	.	.	.	.
TRINITY_DN123620_c0_g1	TRINITY_DN123620_c0_g1_i1	.	.	TRINITY_DN123620_c0_g1_i1|m.81	1-807[+]	.	.	sigP:1^32^0.923^YES	.	.	.	.	.	.	.
TRINITY_DN123620_c0_g1	TRINITY_DN123620_c0_g1_i1	.	.	TRINITY_DN123620_c0_g1_i1|m.82	392-3[-]	.	.	.	ExpAA=21.75^PredHel=1^Topology=o82-104i	.	.	.	.	.	.
TRINITY_DN123655_c0_g1	TRINITY_DN123655_c0_g1_i1	.	.	.	.	.	.	.	.	.	.	.	.	.	.
TRINITY_DN123606_c0_g1	TRINITY_DN123606_c0_g1_i1	.	.	TRINITY_DN123606_c0_g1_i1|m.83	1-528[+]	.	.	.	.	.	.	.	.	.	.
TRINITY_DN123676_c0_g1	TRINITY_DN123676_c0_g1_i1	.	.	.	.	.	.	.	.	.	.	.	.	.	.
TRINITY_DN123688_c0_g1	TRINITY_DN123688_c0_g1_i1	FAB1D_ARATH^FAB1D_ARATH^Q:325-95,H:181-256^61.039%ID^E:1.21e-24^RecName: Full=Putative 1-phosphatidylinositol-3-phosphate 5-kinase FAB1D;^Eukaryota; Viridiplantae; Streptophyta; Embryophyta; Tracheophyta; Spermatophyta; Magnoliophyta; eudicotyledons; Gunneridae; Pentapetalae; rosids; malvids; Brassicales; Brassicaceae; Camelineae; Arabidopsis	.	TRINITY_DN123688_c0_g1_i1|m.84	328-2[-]	FAB1D_ARATH^FAB1D_ARATH^Q:2-94,H:181-272^58.065%ID^E:1.92e-29^RecName: Full=Putative 1-phosphatidylinositol-3-phosphate 5-kinase FAB1D;^Eukaryota; Viridiplantae; Streptophyta; Embryophyta; Tracheophyta; Spermatophyta; Magnoliophyta; eudicotyledons; Gunneridae; Pentapetalae; rosids; malvids; Brassicales; Brassicaceae; Camelineae; Arabidopsis	PF00118.23^Cpn60_TCP1^TCP-1/cpn60 chaperonin family^3-84^E:1e-07	.	.	COG0459^Prevents misfolding and promotes the refolding and proper assembly of unfolded polypeptides generated under stress conditions (By similarity)`COG5253^phosphatidylinositol-4-phosphate 5-kinase	KEGG:ath:AT1G34260`KO:K00921	GO:0005829^cellular_component^cytosol`GO:0010008^cellular_component^endosome membrane`GO:0000285^molecular_function^1-phosphatidylinositol-3-phosphate 5-kinase activity`GO:0005524^molecular_function^ATP binding`GO:0046854^biological_process^phosphatidylinositol phosphorylation`GO:0042147^biological_process^retrograde transport, endosome to Golgi	GO:0005524^molecular_function^ATP binding	.	.
TRINITY_DN123667_c0_g1	TRINITY_DN123667_c0_g1_i1	.	.	.	.	.	.	.	.	.	.	.	.	.	.
TRINITY_DN123679_c0_g1	TRINITY_DN123679_c0_g1_i1	.	.	.	.	.	.	.	.	.	.	.	.	.	.
TRINITY_DN123681_c0_g1	TRINITY_DN123681_c0_g1_i1	LHCA6_ARATH^LHCA6_ARATH^Q:3-83,H:54-80^96.296%ID^E:1.3e-09^RecName: Full=Photosystem I chlorophyll a/b-binding protein 6, chloroplastic {ECO:0000303|PubMed:10366881};^Eukaryota; Viridiplantae; Streptophyta; Embryophyta; Tracheophyta; Spermatophyta; Magnoliophyta; eudicotyledons; Gunneridae; Pentapetalae; rosids; malvids; Brassicales; Brassicaceae; Camelineae; Arabidopsis	.	.	.	.	.	.	.	ENOG410YE22^Chlorophyll A-B binding protein	KEGG:ath:AT1G19150`KO:K08908	GO:0009507^cellular_component^chloroplast`GO:0009941^cellular_component^chloroplast envelope`GO:0009535^cellular_component^chloroplast thylakoid membrane`GO:0016021^cellular_component^integral component of membrane`GO:0009522^cellular_component^photosystem I`GO:0010287^cellular_component^plastoglobule`GO:0016168^molecular_function^chlorophyll binding`GO:0046872^molecular_function^metal ion bindin…	.	.	.
TRINITY_DN123695_c0_g1	TRINITY_DN123695_c0_g1_i1	.	.	.	.	.	.	.	.	.	.	.	.	.	.
TRINITY_DN123670_c0_g1	TRINITY_DN123670_c0_g1_i1	C86A2_ARATH^C86A2_ARATH^Q:5-499,H:350-514^83.03%ID^E:5e-96^RecName: Full=Cytochrome P450 86A2;^Eukaryota; Viridiplantae; Streptophyta; Embryophyta; Tracheophyta; Spermatophyta; Magnoliophyta; eudicotyledons; Gunneridae; Pentapetalae; rosids; malvids; Brassicales; Brassicaceae; Camelineae; Arabidopsis	.	TRINITY_DN123670_c0_g1_i1|m.85	2-505[+]	C86A2_ARATH^C86A2_ARATH^Q:2-166,H:350-514^83.03%ID^E:4.5e-96^RecName: Full=Cytochrome P450 86A2;^Eukaryota; Viridiplantae; Streptophyta; Embryophyta; Tracheophyta; Spermatophyta; Magnoliophyta; eudicotyledons; Gunneridae; Pentapetalae; rosids; malvids; Brassicales; Brassicaceae; Camelineae; Arabidopsis	PF00067.21^p450^Cytochrome P450^11-151^E:1.3e-32	.	.	COG2124^Cytochrome p450	KEGG:ath:AT4G00360`KO:K15398	GO:0016021^cellular_component^integral component of membrane`GO:0018685^molecular_function^alkane 1-monooxygenase activity`GO:0070330^molecular_function^aromatase activity`GO:0020037^molecular_function^heme binding`GO:0005506^molecular_function^iron ion binding`GO:0006952^biological_process^defense response`GO:0006631^biological_process^fatty acid metabolic process	GO:0005506^molecular_function^iron ion binding`GO:0016705^molecular_function^oxidoreductase activity, acting on paired donors, with incorporation or reduction of molecular oxygen`GO:0020037^molecular_function^heme binding`GO:0055114^biological_process^oxidation-reduction process	.	.
TRINITY_DN123690_c0_g1	TRINITY_DN123690_c0_g1_i1	.	.	.	.	.	.	.	.	.	.	.	.	.	.
TRINITY_DN123683_c0_g1	TRINITY_DN123683_c0_g1_i1	.	.	.	.	.	.	.	.	.	.	.	.	.	.
TRINITY_DN123639_c0_g1	TRINITY_DN123639_c0_g1_i1	AEE19_ARATH^AEE19_ARATH^Q:602-742,H:758-800^55.319%ID^E:3.5e-06^RecName: Full=Putative acyl-activating enzyme 19;^Eukaryota; Viridiplantae; Streptophyta; Embryophyta; Tracheophyta; Spermatophyta; Magnoliophyta; eudicotyledons; Gunneridae; Pentapetalae; rosids; malvids; Brassicales; Brassicaceae; Camelineae; Arabidopsis	.	.	.	.	.	.	.	COG1020^non-ribosomal peptide synthetase`COG1520^Part of the outer membrane protein assembly complex, which is involved in assembly and insertion of beta-barrel proteins into the outer membrane (By similarity)	KEGG:ath:AT5G35930`KO:K00142	GO:0003824^molecular_function^catalytic activity`GO:0008152^biological_process^metabolic process	.	.	.
TRINITY_DN123635_c0_g1	TRINITY_DN123635_c0_g1_i1	CIPKL_ARATH^CIPKL_ARATH^Q:534-611,H:178-203^80.769%ID^E:6.33e-06^RecName: Full=CBL-interacting serine/threonine-protein kinase 21;^Eukaryota; Viridiplantae; Streptophyta; Embryophyta; Tracheophyta; Spermatophyta; Magnoliophyta; eudicotyledons; Gunneridae; Pentapetalae; rosids; malvids; Brassicales; Brassicaceae; Camelineae; Arabidopsis	.	.	.	.	.	.	.	COG0515^Serine Threonine protein kinase	KEGG:ath:AT5G57630	GO:0005829^cellular_component^cytosol`GO:0005634^cellular_component^nucleus`GO:0009705^cellular_component^plant-type vacuole membrane`GO:0005524^molecular_function^ATP binding`GO:0004674^molecular_function^protein serine/threonine kinase activity`GO:0071470^biological_process^cellular response to osmotic stress`GO:0071472^biological_process^cellular response to salt stress`GO:0035556^biological_p…	.	.	.
TRINITY_DN123662_c0_g1	TRINITY_DN123662_c0_g1_i1	.	.	.	.	.	.	.	.	.	.	.	.	.	.
TRINITY_DN123608_c0_g1	TRINITY_DN123608_c0_g1_i1	.	.	.	.	.	.	.	.	.	.	.	.	.	.
TRINITY_DN123643_c0_g1	TRINITY_DN123643_c0_g1_i1	.	.	.	.	.	.	.	.	.	.	.	.	.	.
TRINITY_DN123665_c0_g1	TRINITY_DN123665_c0_g1_i1	.	.	.	.	.	.	.	.	.	.	.	.	.	.
TRINITY_DN123637_c1_g1	TRINITY_DN123637_c1_g1_i1	.	.	.	.	.	.	.	.	.	.	.	.	.	.
TRINITY_DN123636_c0_g1	TRINITY_DN123636_c0_g1_i1	Y2910_ARATH^Y2910_ARATH^Q:454-2,H:1-143^59.603%ID^E:3.13e-43^RecName: Full=Putative gamma-glutamylcyclotransferase At3g02910;^Eukaryota; Viridiplantae; Streptophyta; Embryophyta; Tracheophyta; Spermatophyta; Magnoliophyta; eudicotyledons; Gunneridae; Pentapetalae; rosids; malvids; Brassicales; Brassicaceae; Camelineae; Arabidopsis	.	TRINITY_DN123636_c0_g1_i1|m.86	2-508[+]	.	.	.	ExpAA=38.12^PredHel=2^Topology=o15-32i145-167o	.	.	.	.	.	.
TRINITY_DN123636_c0_g1	TRINITY_DN123636_c0_g1_i1	Y2910_ARATH^Y2910_ARATH^Q:454-2,H:1-143^59.603%ID^E:3.13e-43^RecName: Full=Putative gamma-glutamylcyclotransferase At3g02910;^Eukaryota; Viridiplantae; Streptophyta; Embryophyta; Tracheophyta; Spermatophyta; Magnoliophyta; eudicotyledons; Gunneridae; Pentapetalae; rosids; malvids; Brassicales; Brassicaceae; Camelineae; Arabidopsis	.	TRINITY_DN123636_c0_g1_i1|m.87	454-2[-]	Y2910_ARATH^Y2910_ARATH^Q:1-151,H:1-143^59.603%ID^E:2.81e-50^RecName: Full=Putative gamma-glutamylcyclotransferase At3g02910;^Eukaryota; Viridiplantae; Streptophyta; Embryophyta; Tracheophyta; Spermatophyta; Magnoliophyta; eudicotyledons; Gunneridae; Pentapetalae; rosids; malvids; Brassicales; Brassicaceae; Camelineae; Arabidopsis	PF06094.11^GGACT^Gamma-glutamyl cyclotransferase, AIG2-like^20-144^E:2.6e-20	.	.	ENOG410Y5AT^CONTAINS InterPro DOMAIN s Butirosin biosynthesis, BtrG-like (InterPro IPR013024), AIG2-like (InterPro IPR009288)	KEGG:ath:AT3G02910	GO:0016746^molecular_function^transferase activity, transferring acyl groups`GO:0080167^biological_process^response to karrikin	.	.	.
TRINITY_DN123649_c0_g1	TRINITY_DN123649_c0_g1_i1	.	.	.	.	.	.	.	.	.	.	.	.	.	.
TRINITY_DN123666_c0_g1	TRINITY_DN123666_c0_g1_i1	PMT8_ARATH^PMT8_ARATH^Q:8-388,H:491-623^68.421%ID^E:9.26e-57^RecName: Full=Probable methyltransferase PMT8;^Eukaryota; Viridiplantae; Streptophyta; Embryophyta; Tracheophyta; Spermatophyta; Magnoliophyta; eudicotyledons; Gunneridae; Pentapetalae; rosids; malvids; Brassicales; Brassicaceae; Camelineae; Arabidopsis	.	TRINITY_DN123666_c0_g1_i1|m.88	2-391[+]	PMT1_ARATH^PMT1_ARATH^Q:1-129,H:484-611^71.318%ID^E:1.99e-63^RecName: Full=Probable methyltransferase PMT1;^Eukaryota; Viridiplantae; Streptophyta; Embryophyta; Tracheophyta; Spermatophyta; Magnoliophyta; eudicotyledons; Gunneridae; Pentapetalae; rosids; malvids; Brassicales; Brassicaceae; Camelineae; Arabidopsis	PF03141.15^Methyltransf_29^Putative S-adenosyl-L-methionine-dependent methyltransferase^1-116^E:1e-44	.	.	ENOG410YDXK^Methyltransferase	KEGG:ath:AT3G23300	GO:0005737^cellular_component^cytoplasm`GO:0005768^cellular_component^endosome`GO:0005794^cellular_component^Golgi apparatus`GO:0000139^cellular_component^Golgi membrane`GO:0016021^cellular_component^integral component of membrane`GO:0005634^cellular_component^nucleus`GO:0005802^cellular_component^trans-Golgi network`GO:0005774^cellular_component^vacuolar membrane`GO:0008757^molecular_function^S-…	GO:0008168^molecular_function^methyltransferase activity	.	.
TRINITY_DN123664_c0_g1	TRINITY_DN123664_c0_g1_i1	.	.	.	.	.	.	.	.	.	.	.	.	.	.
TRINITY_DN123689_c0_g1	TRINITY_DN123689_c0_g1_i1	U85A8_STERE^U85A8_STERE^Q:2-253,H:394-477^51.19%ID^E:3.44e-24^RecName: Full=UDP-glycosyltransferase 85A8 {ECO:0000303|PubMed:15610349};^Eukaryota; Viridiplantae; Streptophyta; Embryophyta; Tracheophyta; Spermatophyta; Magnoliophyta; eudicotyledons; Gunneridae; Pentapetalae; asterids; campanulids; Asterales; Asteraceae; Asteroideae; Heliantheae alliance; Eupatorieae; Stevia	.	.	.	.	.	.	.	.	.	GO:0016758^molecular_function^transferase activity, transferring hexosyl groups`GO:0008152^biological_process^metabolic process	.	.	.
TRINITY_DN123672_c0_g1	TRINITY_DN123672_c0_g1_i1	.	.	.	.	.	.	.	.	.	.	.	.	.	.
TRINITY_DN123629_c0_g1	TRINITY_DN123629_c0_g1_i1	.	.	.	.	.	.	.	.	.	.	.	.	.	.
TRINITY_DN123687_c0_g1	TRINITY_DN123687_c0_g1_i1	SUVH9_ARATH^SUVH9_ARATH^Q:146-628,H:19-180^36.464%ID^E:3.59e-16^RecName: Full=Histone-lysine N-methyltransferase family member SUVH9;^Eukaryota; Viridiplantae; Streptophyta; Embryophyta; Tracheophyta; Spermatophyta; Magnoliophyta; eudicotyledons; Gunneridae; Pentapetalae; rosids; malvids; Brassicales; Brassicaceae; Camelineae; Arabidopsis	.	TRINITY_DN123687_c0_g1_i1|m.89	44-628[+]	SUVH9_ARATH^SUVH9_ARATH^Q:35-195,H:19-180^36.464%ID^E:3.01e-16^RecName: Full=Histone-lysine N-methyltransferase family member SUVH9;^Eukaryota; Viridiplantae; Streptophyta; Embryophyta; Tracheophyta; Spermatophyta; Magnoliophyta; eudicotyledons; Gunneridae; Pentapetalae; rosids; malvids; Brassicales; Brassicaceae; Camelineae; Arabidopsis	.	.	.	COG3440^ubiquitin-like with PHD and ring finger domains 2, E3 ubiquitin protein ligase	KEGG:ath:AT4G13460`KO:K11420	GO:0000775^cellular_component^chromosome, centromeric region`GO:0005634^cellular_component^nucleus`GO:0003677^molecular_function^DNA binding`GO:0018024^molecular_function^histone-lysine N-methyltransferase activity`GO:0008270^molecular_function^zinc ion binding`GO:0009294^biological_process^DNA mediated transformation`GO:0080188^biological_process^RNA-directed DNA methylation	.	.	.
TRINITY_DN123687_c0_g1	TRINITY_DN123687_c0_g1_i1	SUVH9_ARATH^SUVH9_ARATH^Q:146-628,H:19-180^36.464%ID^E:3.59e-16^RecName: Full=Histone-lysine N-methyltransferase family member SUVH9;^Eukaryota; Viridiplantae; Streptophyta; Embryophyta; Tracheophyta; Spermatophyta; Magnoliophyta; eudicotyledons; Gunneridae; Pentapetalae; rosids; malvids; Brassicales; Brassicaceae; Camelineae; Arabidopsis	.	TRINITY_DN123687_c0_g1_i1|m.90	628-326[-]	.	.	.	.	.	.	.	.	.	.
TRINITY_DN123660_c0_g1	TRINITY_DN123660_c0_g1_i1	.	.	.	.	.	.	.	.	.	.	.	.	.	.
TRINITY_DN123603_c0_g1	TRINITY_DN123603_c0_g1_i1	CSLD3_ARATH^CSLD3_ARATH^Q:2-319,H:922-1027^81.132%ID^E:2.43e-49^RecName: Full=Cellulose synthase-like protein D3;^Eukaryota; Viridiplantae; Streptophyta; Embryophyta; Tracheophyta; Spermatophyta; Magnoliophyta; eudicotyledons; Gunneridae; Pentapetalae; rosids; malvids; Brassicales; Brassicaceae; Camelineae; Arabidopsis	.	TRINITY_DN123603_c0_g1_i1|m.91	2-319[+]	CSLD1_ARATH^CSLD1_ARATH^Q:1-106,H:815-920^84.906%ID^E:1.67e-57^RecName: Full=Cellulose synthase-like protein D1;^Eukaryota; Viridiplantae; Streptophyta; Embryophyta; Tracheophyta; Spermatophyta; Magnoliophyta; eudicotyledons; Gunneridae; Pentapetalae; rosids; malvids; Brassicales; Brassicaceae; Camelineae; Arabidopsis	PF03552.13^Cellulose_synt^Cellulose synthase^1-106^E:6.8e-52	.	ExpAA=63.08^PredHel=3^Topology=o10-29i36-55o70-92i	COG1215^Glycosyl transferase, family 2	KEGG:ath:AT2G33100`KO:K20924	GO:0005794^cellular_component^Golgi apparatus`GO:0000139^cellular_component^Golgi membrane`GO:0016021^cellular_component^integral component of membrane`GO:0016760^molecular_function^cellulose synthase (UDP-forming) activity`GO:0051753^molecular_function^mannan synthase activity`GO:0071555^biological_process^cell wall organization`GO:0030244^biological_process^cellulose biosynthetic process`GO:007…	GO:0016760^molecular_function^cellulose synthase (UDP-forming) activity`GO:0030244^biological_process^cellulose biosynthetic process`GO:0016020^cellular_component^membrane	.	.
TRINITY_DN123611_c0_g2	TRINITY_DN123611_c0_g2_i1	.	.	.	.	.	.	.	.	.	.	.	.	.	.
TRINITY_DN123674_c0_g1	TRINITY_DN123674_c0_g1_i1	.	.	.	.	.	.	.	.	.	.	.	.	.	.
TRINITY_DN123650_c0_g1	TRINITY_DN123650_c0_g1_i1	.	.	TRINITY_DN123650_c0_g1_i1|m.92	2-442[+]	.	.	.	.	.	.	.	.	.	.
TRINITY_DN123656_c0_g1	TRINITY_DN123656_c0_g1_i1	SUT31_ARATH^SUT31_ARATH^Q:235-366,H:295-339^57.778%ID^E:1.97e-08^RecName: Full=Sulfate transporter 3.1;^Eukaryota; Viridiplantae; Streptophyta; Embryophyta; Tracheophyta; Spermatophyta; Magnoliophyta; eudicotyledons; Gunneridae; Pentapetalae; rosids; malvids; Brassicales; Brassicaceae; Camelineae; Arabidopsis	.	.	.	.	.	.	.	COG0659^sulfate transporter	KEGG:ath:AT3G51895`KO:K17471	GO:0009507^cellular_component^chloroplast`GO:0005887^cellular_component^integral component of plasma membrane`GO:0008271^molecular_function^secondary active sulfate transmembrane transporter activity`GO:0015116^molecular_function^sulfate transmembrane transporter activity`GO:0015293^molecular_function^symporter activity`GO:0008272^biological_process^sulfate transport	.	.	.
TRINITY_DN123678_c0_g1	TRINITY_DN123678_c0_g1_i1	.	.	.	.	.	.	.	.	.	.	.	.	.	.
TRINITY_DN123691_c0_g1	TRINITY_DN123691_c0_g1_i1	.	.	.	.	.	.	.	.	.	.	.	.	.	.
TRINITY_DN123626_c0_g1	TRINITY_DN123626_c0_g1_i1	.	.	.	.	.	.	.	.	.	.	.	.	.	.
TRINITY_DN123677_c0_g1	TRINITY_DN123677_c0_g1_i1	.	.	.	.	.	.	.	.	.	.	.	.	.	.
TRINITY_DN123663_c0_g1	TRINITY_DN123663_c0_g1_i1	AGL62_ARATH^AGL62_ARATH^Q:534-91,H:16-167^38.71%ID^E:4.26e-24^RecName: Full=Agamous-like MADS-box protein AGL62;^Eukaryota; Viridiplantae; Streptophyta; Embryophyta; Tracheophyta; Spermatophyta; Magnoliophyta; eudicotyledons; Gunneridae; Pentapetalae; rosids; malvids; Brassicales; Brassicaceae; Camelineae; Arabidopsis	.	TRINITY_DN123663_c0_g1_i1|m.93	679-311[-]	.	.	.	.	.	.	.	.	.	.
TRINITY_DN123668_c0_g1	TRINITY_DN123668_c0_g1_i1	JMJ16_ARATH^JMJ16_ARATH^Q:3-392,H:1085-1208^52.308%ID^E:4.84e-32^RecName: Full=Putative lysine-specific demethylase JMJ16;^Eukaryota; Viridiplantae; Streptophyta; Embryophyta; Tracheophyta; Spermatophyta; Magnoliophyta; eudicotyledons; Gunneridae; Pentapetalae; rosids; malvids; Brassicales; Brassicaceae; Camelineae; Arabidopsis	.	TRINITY_DN123668_c0_g1_i1|m.94	3-401[+]	JMJ16_ARATH^JMJ16_ARATH^Q:1-130,H:1085-1208^52.308%ID^E:1.38e-33^RecName: Full=Putative lysine-specific demethylase JMJ16;^Eukaryota; Viridiplantae; Streptophyta; Embryophyta; Tracheophyta; Spermatophyta; Magnoliophyta; eudicotyledons; Gunneridae; Pentapetalae; rosids; malvids; Brassicales; Brassicaceae; Camelineae; Arabidopsis	PF05965.13^FYRC^F/Y rich C-terminus^4-36^E:6.6e-09	.	.	ENOG410XP0T^lysine (K)-specific demethylase	KEGG:ath:AT1G08620`KO:K11446	GO:0005634^cellular_component^nucleus`GO:0051213^molecular_function^dioxygenase activity`GO:0046872^molecular_function^metal ion binding`GO:0003700^molecular_function^DNA binding transcription factor activity`GO:0016569^biological_process^covalent chromatin modification`GO:0006355^biological_process^regulation of transcription, DNA-templated`GO:0006351^biological_process^transcription, DNA-templa…	GO:0005634^cellular_component^nucleus	.	.
TRINITY_DN123621_c0_g1	TRINITY_DN123621_c0_g1_i1	.	.	.	.	.	.	.	.	.	.	.	.	.	.
TRINITY_DN123616_c0_g1	TRINITY_DN123616_c0_g1_i1	.	.	.	.	.	.	.	.	.	.	.	.	.	.
TRINITY_DN123700_c0_g1	TRINITY_DN123700_c0_g1_i1	.	.	TRINITY_DN123700_c0_g1_i1|m.95	86-382[+]	.	.	sigP:1^29^0.624^YES	ExpAA=20.63^PredHel=1^Topology=i13-35o	.	.	.	.	.	.
TRINITY_DN123673_c0_g1	TRINITY_DN123673_c0_g1_i1	SPZX_ARATH^SPZX_ARATH^Q:211-1002,H:1-263^60.227%ID^E:1.76e-111^RecName: Full=Serpin-ZX;^Eukaryota; Viridiplantae; Streptophyta; Embryophyta; Tracheophyta; Spermatophyta; Magnoliophyta; eudicotyledons; Gunneridae; Pentapetalae; rosids; malvids; Brassicales; Brassicaceae; Camelineae; Arabidopsis	.	TRINITY_DN123673_c0_g1_i1|m.96	211-1002[+]	SPZX_ARATH^SPZX_ARATH^Q:4-264,H:3-263^60.153%ID^E:1.41e-112^RecName: Full=Serpin-ZX;^Eukaryota; Viridiplantae; Streptophyta; Embryophyta; Tracheophyta; Spermatophyta; Magnoliophyta; eudicotyledons; Gunneridae; Pentapetalae; rosids; malvids; Brassicales; Brassicaceae; Camelineae; Arabidopsis	PF00079.19^Serpin^Serpin (serine protease inhibitor)^11-258^E:1.4e-64	.	.	COG4826^serine-type endopeptidase inhibitor activity	KEGG:ath:AT1G47710`KO:K13963	GO:0048046^cellular_component^apoplast`GO:0005737^cellular_component^cytoplasm`GO:0005615^cellular_component^extracellular space`GO:0004869^molecular_function^cysteine-type endopeptidase inhibitor activity`GO:0004867^molecular_function^serine-type endopeptidase inhibitor activity	.	.	.
TRINITY_DN123673_c0_g1	TRINITY_DN123673_c0_g1_i1	SPZX_ARATH^SPZX_ARATH^Q:211-1002,H:1-263^60.227%ID^E:1.76e-111^RecName: Full=Serpin-ZX;^Eukaryota; Viridiplantae; Streptophyta; Embryophyta; Tracheophyta; Spermatophyta; Magnoliophyta; eudicotyledons; Gunneridae; Pentapetalae; rosids; malvids; Brassicales; Brassicaceae; Camelineae; Arabidopsis	.	TRINITY_DN123673_c0_g1_i1|m.97	302-628[+]	.	.	.	.	.	.	.	.	.	.
TRINITY_DN123610_c0_g1	TRINITY_DN123610_c0_g1_i1	IN37_SPIOL^IN37_SPIOL^Q:176-715,H:1-184^71.739%ID^E:2.21e-72^RecName: Full=2-methyl-6-phytyl-1,4-hydroquinone methyltransferase, chloroplastic;^Eukaryota; Viridiplantae; Streptophyta; Embryophyta; Tracheophyta; Spermatophyta; Magnoliophyta; eudicotyledons; Gunneridae; Pentapetalae; Caryophyllales; Chenopodiaceae; Chenopodioideae; Anserineae; Spinacia	.	TRINITY_DN123610_c0_g1_i1|m.98	176-715[+]	IN37_SPIOL^IN37_SPIOL^Q:1-180,H:1-184^71.739%ID^E:1.94e-73^RecName: Full=2-methyl-6-phytyl-1,4-hydroquinone methyltransferase, chloroplastic;^Eukaryota; Viridiplantae; Streptophyta; Embryophyta; Tracheophyta; Spermatophyta; Magnoliophyta; eudicotyledons; Gunneridae; Pentapetalae; Caryophyllales; Chenopodiaceae; Chenopodioideae; Anserineae; Spinacia	PF00398.19^RrnaAD^Ribosomal RNA adenine dimethylase^100-178^E:3.7e-05`PF13649.5^Methyltransf_25^Methyltransferase domain^117-179^E:4.4e-08`PF08241.11^Methyltransf_11^Methyltransferase domain^118-180^E:1.8e-06	.	.	.	.	GO:0009706^cellular_component^chloroplast inner membrane`GO:0016021^cellular_component^integral component of membrane`GO:0102550^molecular_function^2-methyl-6-geranylgeranyl-1,4-benzoquinol methyltransferase activity`GO:0010189^biological_process^vitamin E biosynthetic process	GO:0008168^molecular_function^methyltransferase activity`GO:0008152^biological_process^metabolic process	.	.
TRINITY_DN123647_c0_g1	TRINITY_DN123647_c0_g1_i1	.	.	.	.	.	.	.	.	.	.	.	.	.	.
TRINITY_DN123680_c0_g1	TRINITY_DN123680_c0_g1_i1	.	.	.	.	.	.	.	.	.	.	.	.	.	.
TRINITY_DN116665_c0_g1	TRINITY_DN116665_c0_g1_i1	.	.	.	.	.	.	.	.	.	.	.	.	.	.
TRINITY_DN116658_c0_g2	TRINITY_DN116658_c0_g2_i1	.	.	.	.	.	.	.	.	.	.	.	.	.	.
TRINITY_DN116670_c0_g1	TRINITY_DN116670_c0_g1_i1	UPL3_ARATH^UPL3_ARATH^Q:3-413,H:1252-1386^62.774%ID^E:8.74e-46^RecName: Full=E3 ubiquitin-protein ligase UPL3;^Eukaryota; Viridiplantae; Streptophyta; Embryophyta; Tracheophyta; Spermatophyta; Magnoliophyta; eudicotyledons; Gunneridae; Pentapetalae; rosids; malvids; Brassicales; Brassicaceae; Camelineae; Arabidopsis	.	TRINITY_DN116670_c0_g1_i1|m.99	3-413[+]	UPL3_ARATH^UPL3_ARATH^Q:1-137,H:1252-1386^65.693%ID^E:2.13e-50^RecName: Full=E3 ubiquitin-protein ligase UPL3;^Eukaryota; Viridiplantae; Streptophyta; Embryophyta; Tracheophyta; Spermatophyta; Magnoliophyta; eudicotyledons; Gunneridae; Pentapetalae; rosids; malvids; Brassicales; Brassicaceae; Camelineae; Arabidopsis	.	.	.	COG5021^ubiquitin protein ligase	KEGG:ath:AT4G38600`KO:K10590	GO:0005737^cellular_component^cytoplasm`GO:0005886^cellular_component^plasma membrane`GO:0061630^molecular_function^ubiquitin protein ligase activity`GO:0004842^molecular_function^ubiquitin-protein transferase activity`GO:0042023^biological_process^DNA endoreduplication`GO:0010091^biological_process^trichome branching	.	.	.
TRINITY_DN116674_c0_g1	TRINITY_DN116674_c0_g1_i1	.	.	.	.	.	.	.	.	.	.	.	.	.	.
TRINITY_DN116637_c0_g1	TRINITY_DN116637_c0_g1_i1	.	.	.	.	.	.	.	.	.	.	.	.	.	.
TRINITY_DN116661_c0_g1	TRINITY_DN116661_c0_g1_i1	.	.	.	.	.	.	.	.	.	.	.	.	.	.
TRINITY_DN116662_c0_g1	TRINITY_DN116662_c0_g1_i1	.	.	TRINITY_DN116662_c0_g1_i1|m.100	2-424[+]	.	.	.	ExpAA=49.31^PredHel=2^Topology=i32-54o74-96i	.	.	.	.	.	.
TRINITY_DN116662_c0_g1	TRINITY_DN116662_c0_g1_i1	.	.	TRINITY_DN116662_c0_g1_i1|m.101	1-381[+]	.	.	.	.	.	.	.	.	.	.
TRINITY_DN116662_c0_g1	TRINITY_DN116662_c0_g1_i1	.	.	TRINITY_DN116662_c0_g1_i1|m.102	3-368[+]	.	.	.	.	.	.	.	.	.	.
TRINITY_DN116653_c0_g1	TRINITY_DN116653_c0_g1_i1	.	.	.	.	.	.	.	.	.	.	.	.	.	.
TRINITY_DN116603_c0_g1	TRINITY_DN116603_c0_g1_i1	LPPD_ARATH^LPPD_ARATH^Q:39-401,H:9-129^68.595%ID^E:4.95e-53^RecName: Full=Lipid phosphate phosphatase delta;^Eukaryota; Viridiplantae; Streptophyta; Embryophyta; Tracheophyta; Spermatophyta; Magnoliophyta; eudicotyledons; Gunneridae; Pentapetalae; rosids; malvids; Brassicales; Brassicaceae; Camelineae; Arabidopsis	.	TRINITY_DN116603_c0_g1_i1|m.103	3-401[+]	LPPD_ARATH^LPPD_ARATH^Q:13-133,H:9-129^68.595%ID^E:1.52e-52^RecName: Full=Lipid phosphate phosphatase delta;^Eukaryota; Viridiplantae; Streptophyta; Embryophyta; Tracheophyta; Spermatophyta; Magnoliophyta; eudicotyledons; Gunneridae; Pentapetalae; rosids; malvids; Brassicales; Brassicaceae; Camelineae; Arabidopsis	.	sigP:1^17^0.539^YES	ExpAA=61.13^PredHel=3^Topology=o15-37i49-66o76-98i	COG0671^PHOsphatase	KEGG:ath:AT3G58490	GO:0005789^cellular_component^endoplasmic reticulum membrane`GO:0016021^cellular_component^integral component of membrane`GO:0016787^molecular_function^hydrolase activity`GO:0009737^biological_process^response to abscisic acid`GO:0006665^biological_process^sphingolipid metabolic process`GO:0090332^biological_process^stomatal closure	.	.	.
TRINITY_DN116603_c0_g1	TRINITY_DN116603_c0_g1_i2	LPPD_ARATH^LPPD_ARATH^Q:39-296,H:9-94^62.791%ID^E:7.17e-29^RecName: Full=Lipid phosphate phosphatase delta;^Eukaryota; Viridiplantae; Streptophyta; Embryophyta; Tracheophyta; Spermatophyta; Magnoliophyta; eudicotyledons; Gunneridae; Pentapetalae; rosids; malvids; Brassicales; Brassicaceae; Camelineae; Arabidopsis	.	TRINITY_DN116603_c0_g1_i2|m.104	3-314[+]	LPPD_ARATH^LPPD_ARATH^Q:13-98,H:9-94^62.791%ID^E:2.92e-29^RecName: Full=Lipid phosphate phosphatase delta;^Eukaryota; Viridiplantae; Streptophyta; Embryophyta; Tracheophyta; Spermatophyta; Magnoliophyta; eudicotyledons; Gunneridae; Pentapetalae; rosids; malvids; Brassicales; Brassicaceae; Camelineae; Arabidopsis	.	sigP:1^17^0.539^YES	ExpAA=60.46^PredHel=3^Topology=o15-37i49-66o76-98i	COG0671^PHOsphatase	KEGG:ath:AT3G58490	GO:0005789^cellular_component^endoplasmic reticulum membrane`GO:0016021^cellular_component^integral component of membrane`GO:0016787^molecular_function^hydrolase activity`GO:0009737^biological_process^response to abscisic acid`GO:0006665^biological_process^sphingolipid metabolic process`GO:0090332^biological_process^stomatal closure	.	.	.
TRINITY_DN116692_c0_g1	TRINITY_DN116692_c0_g1_i1	SWC4_ARATH^SWC4_ARATH^Q:5-313,H:145-194^38.835%ID^E:7.6e-11^RecName: Full=SWR1-complex protein 4;^Eukaryota; Viridiplantae; Streptophyta; Embryophyta; Tracheophyta; Spermatophyta; Magnoliophyta; eudicotyledons; Gunneridae; Pentapetalae; rosids; malvids; Brassicales; Brassicaceae; Camelineae; Arabidopsis	.	.	.	.	.	.	.	ENOG410XSA4^DNA methyltransferase 1 associated protein 1	KEGG:ath:AT2G47210`KO:K11324	GO:0035267^cellular_component^NuA4 histone acetyltransferase complex`GO:0005634^cellular_component^nucleus`GO:0000812^cellular_component^Swr1 complex`GO:0003677^molecular_function^DNA binding`GO:0003714^molecular_function^transcription corepressor activity`GO:0006338^biological_process^chromatin remodeling`GO:0006281^biological_process^DNA repair`GO:0043968^biological_process^histone H2A acetylat…	.	.	.
TRINITY_DN116678_c0_g1	TRINITY_DN116678_c0_g1_i1	.	.	.	.	.	.	.	.	.	.	.	.	.	.
TRINITY_DN116685_c0_g1	TRINITY_DN116685_c0_g1_i1	.	.	.	.	.	.	.	.	.	.	.	.	.	.
TRINITY_DN116682_c0_g1	TRINITY_DN116682_c0_g1_i1	SWI3D_ARATH^SWI3D_ARATH^Q:5-439,H:432-578^43.624%ID^E:5.4e-23^RecName: Full=SWI/SNF complex subunit SWI3D;^Eukaryota; Viridiplantae; Streptophyta; Embryophyta; Tracheophyta; Spermatophyta; Magnoliophyta; eudicotyledons; Gunneridae; Pentapetalae; rosids; malvids; Brassicales; Brassicaceae; Camelineae; Arabidopsis	.	TRINITY_DN116682_c0_g1_i1|m.105	2-448[+]	SWI3D_ARATH^SWI3D_ARATH^Q:2-146,H:432-578^43.624%ID^E:4.86e-23^RecName: Full=SWI/SNF complex subunit SWI3D;^Eukaryota; Viridiplantae; Streptophyta; Embryophyta; Tracheophyta; Spermatophyta; Magnoliophyta; eudicotyledons; Gunneridae; Pentapetalae; rosids; malvids; Brassicales; Brassicaceae; Camelineae; Arabidopsis	.	.	.	COG5259^SWI SNF related, matrix associated, actin dependent regulator of chromatin, subfamily c, member	KEGG:ath:AT4G34430`KO:K11649	GO:0005634^cellular_component^nucleus`GO:0003677^molecular_function^DNA binding`GO:0008270^molecular_function^zinc ion binding`GO:0016569^biological_process^covalent chromatin modification`GO:0007275^biological_process^multicellular organism development`GO:0006355^biological_process^regulation of transcription, DNA-templated`GO:0006351^biological_process^transcription, DNA-templated	.	.	.
TRINITY_DN116654_c0_g1	TRINITY_DN116654_c0_g1_i1	.	.	.	.	.	.	.	.	.	.	.	.	.	.
TRINITY_DN116694_c0_g1	TRINITY_DN116694_c0_g1_i1	.	.	TRINITY_DN116694_c0_g1_i1|m.106	366-61[-]	.	.	.	ExpAA=59.75^PredHel=3^Topology=o10-29i50-67o77-99i	.	.	.	.	.	.
TRINITY_DN116688_c0_g1	TRINITY_DN116688_c0_g1_i1	.	.	.	.	.	.	.	.	.	.	.	.	.	.
TRINITY_DN116622_c0_g1	TRINITY_DN116622_c0_g1_i1	PSI1_SCHPO^PSI1_SCHPO^Q:2-238,H:295-373^55.696%ID^E:3.64e-24^RecName: Full=Protein psi1;^Eukaryota; Fungi; Dikarya; Ascomycota; Taphrinomycotina; Schizosaccharomycetes; Schizosaccharomycetales; Schizosaccharomycetaceae; Schizosaccharomyces	.	.	.	.	.	.	.	.	KEGG:spo:SPCC830.07c`KO:K09510	GO:0005829^cellular_component^cytosol`GO:0005634^cellular_component^nucleus`GO:0030544^molecular_function^Hsp70 protein binding`GO:0051082^molecular_function^unfolded protein binding`GO:0002183^biological_process^cytoplasmic translational initiation`GO:0006457^biological_process^protein folding	.	.	.
TRINITY_DN116672_c0_g1	TRINITY_DN116672_c0_g1_i1	.	.	.	.	.	.	.	.	.	.	.	.	.	.
TRINITY_DN116633_c0_g1	TRINITY_DN116633_c0_g1_i1	.	.	.	.	.	.	.	.	.	.	.	.	.	.
TRINITY_DN116623_c0_g1	TRINITY_DN116623_c0_g1_i1	.	.	TRINITY_DN116623_c0_g1_i1|m.107	127-444[+]	.	.	.	.	.	.	.	.	.	.
TRINITY_DN116645_c0_g1	TRINITY_DN116645_c0_g1_i1	.	.	.	.	.	.	.	.	.	.	.	.	.	.
TRINITY_DN116695_c0_g1	TRINITY_DN116695_c0_g1_i1	.	.	.	.	.	.	.	.	.	.	.	.	.	.
TRINITY_DN116606_c0_g1	TRINITY_DN116606_c0_g1_i1	.	.	TRINITY_DN116606_c0_g1_i1|m.108	330-1[-]	.	.	.	.	.	.	.	.	.	.
TRINITY_DN116693_c0_g1	TRINITY_DN116693_c0_g1_i1	ODO1_DICDI^ODO1_DICDI^Q:299-391,H:710-740^90.323%ID^E:9.31e-12^RecName: Full=2-oxoglutarate dehydrogenase, mitochondrial;^Eukaryota; Amoebozoa; Mycetozoa; Dictyosteliida; Dictyostelium	.	.	.	.	.	.	.	COG0567^2-oxoglutarate dehydrogenase, E1	KEGG:ddi:DDB_G0288127`KO:K00164	GO:0009353^cellular_component^mitochondrial oxoglutarate dehydrogenase complex`GO:0005739^cellular_component^mitochondrion`GO:0045252^cellular_component^oxoglutarate dehydrogenase complex`GO:0004591^molecular_function^oxoglutarate dehydrogenase (succinyl-transferring) activity`GO:0030976^molecular_function^thiamine pyrophosphate binding`GO:0006096^biological_process^glycolytic process`GO:0006099^…	.	.	.
TRINITY_DN116638_c0_g1	TRINITY_DN116638_c0_g1_i1	.	.	.	.	.	.	.	.	.	.	.	.	.	.
TRINITY_DN116602_c0_g1	TRINITY_DN116602_c0_g1_i1	HAK25_ORYSJ^HAK25_ORYSJ^Q:1058-81,H:423-770^44.126%ID^E:5.28e-89^RecName: Full=Potassium transporter 25;^Eukaryota; Viridiplantae; Streptophyta; Embryophyta; Tracheophyta; Spermatophyta; Magnoliophyta; Liliopsida; Poales; Poaceae; BOP clade; Oryzoideae; Oryzeae; Oryzinae; Oryza; Oryza sativa	.	TRINITY_DN116602_c0_g1_i1|m.109	1028-78[-]	HAK25_ORYSJ^HAK25_ORYSJ^Q:1-316,H:433-770^45.428%ID^E:1.65e-92^RecName: Full=Potassium transporter 25;^Eukaryota; Viridiplantae; Streptophyta; Embryophyta; Tracheophyta; Spermatophyta; Magnoliophyta; Liliopsida; Poales; Poaceae; BOP clade; Oryzoideae; Oryzeae; Oryzinae; Oryza; Oryza sativa	PF02705.15^K_trans^K+ potassium transporter^1-172^E:7.2e-32	.	ExpAA=50.59^PredHel=2^Topology=o20-41i48-70o	COG3158^Transport of potassium into the cell (By similarity)	KEGG:osa:4330614`KO:K03549	GO:0016021^cellular_component^integral component of membrane`GO:0005886^cellular_component^plasma membrane`GO:0015079^molecular_function^potassium ion transmembrane transporter activity	GO:0015079^molecular_function^potassium ion transmembrane transporter activity`GO:0071805^biological_process^potassium ion transmembrane transport`GO:0016020^cellular_component^membrane	.	.
TRINITY_DN116602_c0_g1	TRINITY_DN116602_c0_g1_i1	HAK25_ORYSJ^HAK25_ORYSJ^Q:1058-81,H:423-770^44.126%ID^E:5.28e-89^RecName: Full=Potassium transporter 25;^Eukaryota; Viridiplantae; Streptophyta; Embryophyta; Tracheophyta; Spermatophyta; Magnoliophyta; Liliopsida; Poales; Poaceae; BOP clade; Oryzoideae; Oryzeae; Oryzinae; Oryza; Oryza sativa	.	TRINITY_DN116602_c0_g1_i1|m.110	199-510[+]	.	.	.	.	.	.	.	.	.	.
TRINITY_DN116659_c0_g1	TRINITY_DN116659_c0_g1_i1	C90D1_ARATH^C90D1_ARATH^Q:1-882,H:91-387^67.677%ID^E:8.58e-136^RecName: Full=3-epi-6-deoxocathasterone 23-monooxygenase;^Eukaryota; Viridiplantae; Streptophyta; Embryophyta; Tracheophyta; Spermatophyta; Magnoliophyta; eudicotyledons; Gunneridae; Pentapetalae; rosids; malvids; Brassicales; Brassicaceae; Camelineae; Arabidopsis	.	TRINITY_DN116659_c0_g1_i1|m.111	1-882[+]	C90D1_ARATH^C90D1_ARATH^Q:1-294,H:91-387^67.677%ID^E:7.72e-136^RecName: Full=3-epi-6-deoxocathasterone 23-monooxygenase;^Eukaryota; Viridiplantae; Streptophyta; Embryophyta; Tracheophyta; Spermatophyta; Magnoliophyta; eudicotyledons; Gunneridae; Pentapetalae; rosids; malvids; Brassicales; Brassicaceae; Camelineae; Arabidopsis	PF00067.21^p450^Cytochrome P450^4-293^E:6.2e-17	.	.	COG2124^Cytochrome p450	KEGG:ath:AT3G13730`KO:K12638	GO:0005789^cellular_component^endoplasmic reticulum membrane`GO:0016021^cellular_component^integral component of membrane`GO:0102097^molecular_function^(22S)-22-hydroxy-5alpha-campestan-3-one C-23 hydroxylase activity`GO:0020037^molecular_function^heme binding`GO:0005506^molecular_function^iron ion binding`GO:0016709^molecular_function^oxidoreductase activity, acting on paired donors, with incorp…	GO:0005506^molecular_function^iron ion binding`GO:0016705^molecular_function^oxidoreductase activity, acting on paired donors, with incorporation or reduction of molecular oxygen`GO:0020037^molecular_function^heme binding`GO:0055114^biological_process^oxidation-reduction process	.	.
TRINITY_DN116619_c0_g1	TRINITY_DN116619_c0_g1_i1	.	.	.	.	.	.	.	.	.	.	.	.	.	.
TRINITY_DN116651_c0_g1	TRINITY_DN116651_c0_g1_i1	BADH1_ARATH^BADH1_ARATH^Q:194-469,H:1-92^71.739%ID^E:4.48e-40^RecName: Full=Betaine aldehyde dehydrogenase 1, chloroplastic;^Eukaryota; Viridiplantae; Streptophyta; Embryophyta; Tracheophyta; Spermatophyta; Magnoliophyta; eudicotyledons; Gunneridae; Pentapetalae; rosids; malvids; Brassicales; Brassicaceae; Camelineae; Arabidopsis	.	TRINITY_DN116651_c0_g1_i1|m.112	469-2[-]	.	.	.	ExpAA=20.73^PredHel=1^Topology=i91-113o	.	.	.	.	.	.
TRINITY_DN116681_c0_g1	TRINITY_DN116681_c0_g1_i1	.	.	.	.	.	.	.	.	.	.	.	.	.	.
TRINITY_DN116631_c0_g1	TRINITY_DN116631_c0_g1_i1	.	.	.	.	.	.	.	.	.	.	.	.	.	.
TRINITY_DN116634_c0_g1	TRINITY_DN116634_c0_g1_i1	.	.	.	.	.	.	.	.	.	.	.	.	.	.
TRINITY_DN116666_c0_g1	TRINITY_DN116666_c0_g1_i1	.	.	.	.	.	.	.	.	.	.	.	.	.	.
TRINITY_DN116640_c0_g1	TRINITY_DN116640_c0_g1_i1	.	.	.	.	.	.	.	.	.	.	.	.	.	.
TRINITY_DN116627_c0_g1	TRINITY_DN116627_c0_g1_i1	AHR_ECOLI^AHR_ECOLI^Q:24-350,H:232-337^30.275%ID^E:1.29e-07^RecName: Full=Aldehyde reductase Ahr;^Bacteria; Proteobacteria; Gammaproteobacteria; Enterobacterales; Enterobacteriaceae; Escherichia	.	TRINITY_DN116627_c0_g1_i1|m.113	3-356[+]	AHR_ECOLI^AHR_ECOLI^Q:8-116,H:232-337^30.275%ID^E:2.95e-08^RecName: Full=Aldehyde reductase Ahr;^Bacteria; Proteobacteria; Gammaproteobacteria; Enterobacterales; Enterobacteriaceae; Escherichia	.	.	.	COG1064^alcohol dehydrogenase	KEGG:ecj:JW5761`KEGG:eco:b4269`KO:K12957	GO:0008106^molecular_function^alcohol dehydrogenase (NADP+) activity`GO:0008270^molecular_function^zinc ion binding`GO:0006631^biological_process^fatty acid metabolic process	.	.	.
TRINITY_DN116675_c0_g1	TRINITY_DN116675_c0_g1_i1	.	.	.	.	.	.	.	.	.	.	.	.	.	.
TRINITY_DN116676_c0_g1	TRINITY_DN116676_c0_g1_i1	FMP46_SCHPO^FMP46_SCHPO^Q:106-297,H:42-105^40.625%ID^E:6.7e-11^RecName: Full=Putative redox protein fmp46, mitochondrial;^Eukaryota; Fungi; Dikarya; Ascomycota; Taphrinomycotina; Schizosaccharomycetes; Schizosaccharomycetales; Schizosaccharomycetaceae; Schizosaccharomyces	.	TRINITY_DN116676_c0_g1_i1|m.114	584-120[-]	.	.	.	ExpAA=21.62^PredHel=1^Topology=i69-91o	.	.	.	.	.	.
TRINITY_DN116676_c0_g1	TRINITY_DN116676_c0_g1_i1	FMP46_SCHPO^FMP46_SCHPO^Q:106-297,H:42-105^40.625%ID^E:6.7e-11^RecName: Full=Putative redox protein fmp46, mitochondrial;^Eukaryota; Fungi; Dikarya; Ascomycota; Taphrinomycotina; Schizosaccharomycetes; Schizosaccharomycetales; Schizosaccharomycetaceae; Schizosaccharomyces	.	TRINITY_DN116676_c0_g1_i1|m.115	1-369[+]	FMP46_SCHPO^FMP46_SCHPO^Q:36-99,H:42-105^40.625%ID^E:9.98e-12^RecName: Full=Putative redox protein fmp46, mitochondrial;^Eukaryota; Fungi; Dikarya; Ascomycota; Taphrinomycotina; Schizosaccharomycetes; Schizosaccharomycetales; Schizosaccharomycetaceae; Schizosaccharomyces	PF07955.10^DUF1687^Protein of unknown function (DUF1687)^1-100^E:3.5e-21	.	.	.	KEGG:spo:SPAC25B8.18	GO:0005829^cellular_component^cytosol`GO:0005739^cellular_component^mitochondrion`GO:0005634^cellular_component^nucleus`GO:0016491^molecular_function^oxidoreductase activity	GO:0016491^molecular_function^oxidoreductase activity`GO:0055114^biological_process^oxidation-reduction process`GO:0005739^cellular_component^mitochondrion	.	.
TRINITY_DN116613_c0_g1	TRINITY_DN116613_c0_g1_i1	.	.	.	.	.	.	.	.	.	.	.	.	.	.
TRINITY_DN116700_c0_g1	TRINITY_DN116700_c0_g1_i1	PBL10_ARATH^PBL10_ARATH^Q:315-410,H:216-247^90.625%ID^E:5.42e-13^RecName: Full=Probable serine/threonine-protein kinase PBL10 {ECO:0000305};^Eukaryota; Viridiplantae; Streptophyta; Embryophyta; Tracheophyta; Spermatophyta; Magnoliophyta; eudicotyledons; Gunneridae; Pentapetalae; rosids; malvids; Brassicales; Brassicaceae; Camelineae; Arabidopsis`PBL10_ARATH^PBL10_ARATH^Q:2-79,H:189-214^80.769%ID^…	.	TRINITY_DN116700_c0_g1_i1|m.116	2-334[+]	PBL9_ARATH^PBL9_ARATH^Q:1-26,H:188-213^80.769%ID^E:8.91e-07^RecName: Full=Probable serine/threonine-protein kinase PBL9 {ECO:0000305};^Eukaryota; Viridiplantae; Streptophyta; Embryophyta; Tracheophyta; Spermatophyta; Magnoliophyta; eudicotyledons; Gunneridae; Pentapetalae; rosids; malvids; Brassicales; Brassicaceae; Camelineae; Arabidopsis	.	.	ExpAA=23.20^PredHel=1^Topology=o30-49i	COG0515^Serine Threonine protein kinase	KEGG:ath:AT1G07570	GO:0005886^cellular_component^plasma membrane`GO:0005524^molecular_function^ATP binding`GO:0004713^molecular_function^protein tyrosine kinase activity`GO:0004675^molecular_function^transmembrane receptor protein serine/threonine kinase activity`GO:0007166^biological_process^cell surface receptor signaling pathway`GO:0006952^biological_process^defense response	.	.	.
TRINITY_DN116642_c0_g1	TRINITY_DN116642_c0_g1_i1	.	.	.	.	.	.	.	.	.	.	.	.	.	.
TRINITY_DN116683_c0_g1	TRINITY_DN116683_c0_g1_i1	.	.	.	.	.	.	.	.	.	.	.	.	.	.
TRINITY_DN116668_c0_g1	TRINITY_DN116668_c0_g1_i1	.	.	.	.	.	.	.	.	.	.	.	.	.	.
TRINITY_DN116686_c0_g1	TRINITY_DN116686_c0_g1_i1	.	.	.	.	.	.	.	.	.	.	.	.	.	.
TRINITY_DN116646_c0_g1	TRINITY_DN116646_c0_g1_i1	HKT1_ARATH^HKT1_ARATH^Q:1-459,H:85-218^35.484%ID^E:5.2e-16^RecName: Full=Sodium transporter HKT1;^Eukaryota; Viridiplantae; Streptophyta; Embryophyta; Tracheophyta; Spermatophyta; Magnoliophyta; eudicotyledons; Gunneridae; Pentapetalae; rosids; malvids; Brassicales; Brassicaceae; Camelineae; Arabidopsis	.	TRINITY_DN116646_c0_g1_i1|m.117	1-459[+]	HKT1_ARATH^HKT1_ARATH^Q:1-153,H:85-218^36.076%ID^E:2.01e-17^RecName: Full=Sodium transporter HKT1;^Eukaryota; Viridiplantae; Streptophyta; Embryophyta; Tracheophyta; Spermatophyta; Magnoliophyta; eudicotyledons; Gunneridae; Pentapetalae; rosids; malvids; Brassicales; Brassicaceae; Camelineae; Arabidopsis	.	.	ExpAA=24.77^PredHel=1^Topology=o96-118i	COG0168^Low-affinity potassium transport system. Interacts with Trk system potassium uptake protein TrkA (By similarity)	KEGG:ath:AT4G10310	GO:0016021^cellular_component^integral component of membrane`GO:0005886^cellular_component^plasma membrane`GO:0015079^molecular_function^potassium ion transmembrane transporter activity`GO:0006813^biological_process^potassium ion transport`GO:0006970^biological_process^response to osmotic stress`GO:0009651^biological_process^response to salt stress`GO:0006814^biological_process^sodium ion transpo…	.	.	.
TRINITY_DN116630_c0_g1	TRINITY_DN116630_c0_g1_i1	GLNA3_MAIZE^GLNA3_MAIZE^Q:2-160,H:304-356^96.226%ID^E:2.46e-28^RecName: Full=Glutamine synthetase root isozyme 3;^Eukaryota; Viridiplantae; Streptophyta; Embryophyta; Tracheophyta; Spermatophyta; Magnoliophyta; Liliopsida; Poales; Poaceae; PACMAD clade; Panicoideae; Andropogonodae; Andropogoneae; Tripsacinae; Zea	.	.	.	.	.	.	.	COG0174^glutamine synthetase	KEGG:zma:542214`KO:K01915	GO:0005737^cellular_component^cytoplasm`GO:0005524^molecular_function^ATP binding`GO:0004356^molecular_function^glutamate-ammonia ligase activity`GO:0006542^biological_process^glutamine biosynthetic process	.	.	.
TRINITY_DN116655_c0_g1	TRINITY_DN116655_c0_g1_i1	.	.	TRINITY_DN116655_c0_g1_i1|m.118	999-688[-]	.	.	.	.	.	.	.	.	.	.
TRINITY_DN116636_c0_g1	TRINITY_DN116636_c0_g1_i1	GOX_SPIOL^GOX_SPIOL^Q:356-439,H:130-157^100%ID^E:4.92e-10^RecName: Full=Peroxisomal (S)-2-hydroxy-acid oxidase;^Eukaryota; Viridiplantae; Streptophyta; Embryophyta; Tracheophyta; Spermatophyta; Magnoliophyta; eudicotyledons; Gunneridae; Pentapetalae; Caryophyllales; Chenopodiaceae; Chenopodioideae; Anserineae; Spinacia`GOX_SPIOL^GOX_SPIOL^Q:2-88,H:102-130^89.655%ID^E:3.68e-09^RecName: Full=Peroxi…	.	.	.	.	.	.	.	.	.	GO:0005777^cellular_component^peroxisome`GO:0010181^molecular_function^FMN binding`GO:0052853^molecular_function^long-chain-(S)-2-hydroxy-long-chain-acid oxidase activity`GO:0052854^molecular_function^medium-chain-(S)-2-hydroxy-acid oxidase activity`GO:0052852^molecular_function^very-long-chain-(S)-2-hydroxy-acid oxidase activity`GO:0009854^biological_process^oxidative photosynthetic carbon pathw…	.	.	.
TRINITY_DN116618_c0_g1	TRINITY_DN116618_c0_g1_i1	PBP1_ARATH^PBP1_ARATH^Q:214-528,H:15-120^56.604%ID^E:7.18e-35^RecName: Full=Calcium-binding protein PBP1;^Eukaryota; Viridiplantae; Streptophyta; Embryophyta; Tracheophyta; Spermatophyta; Magnoliophyta; eudicotyledons; Gunneridae; Pentapetalae; rosids; malvids; Brassicales; Brassicaceae; Camelineae; Arabidopsis	.	TRINITY_DN116618_c0_g1_i1|m.119	533-192[-]	.	.	.	.	.	.	.	.	.	.
TRINITY_DN116618_c0_g1	TRINITY_DN116618_c0_g1_i1	PBP1_ARATH^PBP1_ARATH^Q:214-528,H:15-120^56.604%ID^E:7.18e-35^RecName: Full=Calcium-binding protein PBP1;^Eukaryota; Viridiplantae; Streptophyta; Embryophyta; Tracheophyta; Spermatophyta; Magnoliophyta; eudicotyledons; Gunneridae; Pentapetalae; rosids; malvids; Brassicales; Brassicaceae; Camelineae; Arabidopsis	.	TRINITY_DN116618_c0_g1_i1|m.120	202-534[+]	PBP1_ARATH^PBP1_ARATH^Q:5-109,H:15-120^56.604%ID^E:3.61e-36^RecName: Full=Calcium-binding protein PBP1;^Eukaryota; Viridiplantae; Streptophyta; Embryophyta; Tracheophyta; Spermatophyta; Magnoliophyta; eudicotyledons; Gunneridae; Pentapetalae; rosids; malvids; Brassicales; Brassicaceae; Camelineae; Arabidopsis	PF13833.5^EF-hand_8^EF-hand domain pair^41-92^E:6e-17	.	.	COG5126^Calcium-binding protein	KEGG:ath:AT5G54490	GO:0005509^molecular_function^calcium ion binding`GO:0009733^biological_process^response to auxin	GO:0005509^molecular_function^calcium ion binding	.	.
TRINITY_DN116643_c0_g1	TRINITY_DN116643_c0_g1_i1	.	.	.	.	.	.	.	.	.	.	.	.	.	.
TRINITY_DN116639_c0_g1	TRINITY_DN116639_c0_g1_i1	.	.	.	.	.	.	.	.	.	.	.	.	.	.
TRINITY_DN116657_c1_g1	TRINITY_DN116657_c1_g1_i1	.	.	.	.	.	.	.	.	.	.	.	.	.	.
TRINITY_DN116652_c0_g1	TRINITY_DN116652_c0_g1_i1	KN7D_ARATH^KN7D_ARATH^Q:20-97,H:186-211^80.769%ID^E:2.11e-06^RecName: Full=Kinesin-like protein KIN-7D, mitochondrial {ECO:0000305};^Eukaryota; Viridiplantae; Streptophyta; Embryophyta; Tracheophyta; Spermatophyta; Magnoliophyta; eudicotyledons; Gunneridae; Pentapetalae; rosids; malvids; Brassicales; Brassicaceae; Camelineae; Arabidopsis	.	TRINITY_DN116652_c0_g1_i1|m.121	331-26[-]	.	.	.	ExpAA=22.34^PredHel=1^Topology=i44-66o	.	.	.	.	.	.
TRINITY_DN100459_c0_g1	TRINITY_DN100459_c0_g1_i1	.	.	.	.	.	.	.	.	.	.	.	.	.	.
TRINITY_DN100482_c0_g1	TRINITY_DN100482_c0_g1_i1	.	.	.	.	.	.	.	.	.	.	.	.	.	.
TRINITY_DN100454_c0_g1	TRINITY_DN100454_c0_g1_i1	ATPG_TOBAC^ATPG_TOBAC^Q:2-439,H:5-151^80.272%ID^E:1.8e-46^RecName: Full=ATP synthase gamma chain, chloroplastic;^Eukaryota; Viridiplantae; Streptophyta; Embryophyta; Tracheophyta; Spermatophyta; Magnoliophyta; eudicotyledons; Gunneridae; Pentapetalae; asterids; lamiids; Solanales; Solanaceae; Nicotianoideae; Nicotianeae; Nicotiana	.	.	.	.	.	.	.	.	KEGG:nta:107813955`KO:K02115	GO:0009535^cellular_component^chloroplast thylakoid membrane`GO:0045261^cellular_component^proton-transporting ATP synthase complex, catalytic core F(1)`GO:0046933^molecular_function^proton-transporting ATP synthase activity, rotational mechanism`GO:0015986^biological_process^ATP synthesis coupled proton transport	.	.	.
TRINITY_DN100490_c0_g1	TRINITY_DN100490_c0_g1_i1	.	.	TRINITY_DN100490_c0_g1_i1|m.122	3-917[+]	.	.	.	.	.	.	.	.	.	.
TRINITY_DN100490_c0_g1	TRINITY_DN100490_c0_g1_i1	.	.	TRINITY_DN100490_c0_g1_i1|m.123	628-329[-]	.	.	sigP:1^22^0.672^YES	.	.	.	.	.	.	.
TRINITY_DN100441_c0_g1	TRINITY_DN100441_c0_g1_i1	.	.	TRINITY_DN100441_c0_g1_i1|m.124	739-2[-]	.	.	.	.	.	.	.	.	.	.
TRINITY_DN100441_c0_g1	TRINITY_DN100441_c0_g1_i1	.	.	TRINITY_DN100441_c0_g1_i1|m.125	2-640[+]	TYRO_NEUCR^TYRO_NEUCR^Q:9-137,H:549-680^32.143%ID^E:3.08e-06^RecName: Full=Tyrosinase;^Eukaryota; Fungi; Dikarya; Ascomycota; Pezizomycotina; Sordariomycetes; Sordariomycetidae; Sordariales; Sordariaceae; Neurospora	.	.	.	.	KEGG:ncr:NCU00776`KO:K00505	GO:0046872^molecular_function^metal ion binding`GO:0004503^molecular_function^monophenol monooxygenase activity`GO:0042438^biological_process^melanin biosynthetic process	.	.	.
TRINITY_DN100464_c0_g1	TRINITY_DN100464_c0_g1_i1	.	.	.	.	.	.	.	.	.	.	.	.	.	.
TRINITY_DN100495_c0_g1	TRINITY_DN100495_c0_g1_i1	.	.	TRINITY_DN100495_c0_g1_i1|m.126	308-3[-]	.	.	.	.	.	.	.	.	.	.
TRINITY_DN100492_c0_g1	TRINITY_DN100492_c0_g1_i1	EASD_EMENI^EASD_EMENI^Q:3-416,H:283-420^42.029%ID^E:1.7e-33^RecName: Full=Acyl-CoA ligase easD {ECO:0000303|PubMed:18559263};^Eukaryota; Fungi; Dikarya; Ascomycota; Pezizomycotina; Eurotiomycetes; Eurotiomycetidae; Eurotiales; Aspergillaceae; Aspergillus	.	TRINITY_DN100492_c0_g1_i1|m.127	3-416[+]	EASD_EMENI^EASD_EMENI^Q:1-138,H:283-420^42.029%ID^E:1.53e-33^RecName: Full=Acyl-CoA ligase easD {ECO:0000303|PubMed:18559263};^Eukaryota; Fungi; Dikarya; Ascomycota; Pezizomycotina; Eurotiomycetes; Eurotiomycetidae; Eurotiales; Aspergillaceae; Aspergillus	PF00501.27^AMP-binding^AMP-binding enzyme^4-138^E:7.3e-28	.	.	.	KEGG:ani:AN2549.2	GO:0005524^molecular_function^ATP binding`GO:0016874^molecular_function^ligase activity`GO:1900617^biological_process^emericellamide A biosynthetic process`GO:1900557^biological_process^emericellamide biosynthetic process	GO:0003824^molecular_function^catalytic activity`GO:0008152^biological_process^metabolic process	.	.
TRINITY_DN100492_c0_g1	TRINITY_DN100492_c0_g1_i1	EASD_EMENI^EASD_EMENI^Q:3-416,H:283-420^42.029%ID^E:1.7e-33^RecName: Full=Acyl-CoA ligase easD {ECO:0000303|PubMed:18559263};^Eukaryota; Fungi; Dikarya; Ascomycota; Pezizomycotina; Eurotiomycetes; Eurotiomycetidae; Eurotiales; Aspergillaceae; Aspergillus	.	TRINITY_DN100492_c0_g1_i1|m.128	2-334[+]	.	.	.	.	.	.	.	.	.	.
TRINITY_DN100475_c0_g1	TRINITY_DN100475_c0_g1_i1	.	.	.	.	.	.	.	.	.	.	.	.	.	.
TRINITY_DN100498_c0_g1	TRINITY_DN100498_c0_g1_i1	.	.	.	.	.	.	.	.	.	.	.	.	.	.
TRINITY_DN100472_c0_g1	TRINITY_DN100472_c0_g1_i1	.	.	.	.	.	.	.	.	.	.	.	.	.	.
TRINITY_DN100458_c0_g1	TRINITY_DN100458_c0_g1_i1	MYB08_ANTMA^MYB08_ANTMA^Q:2-337,H:81-187^41.667%ID^E:1.44e-18^RecName: Full=Myb-related protein 308;^Eukaryota; Viridiplantae; Streptophyta; Embryophyta; Tracheophyta; Spermatophyta; Magnoliophyta; eudicotyledons; Gunneridae; Pentapetalae; asterids; lamiids; Lamiales; Plantaginaceae; Antirrhineae; Antirrhinum	.	TRINITY_DN100458_c0_g1_i1|m.129	2-424[+]	MYB08_ANTMA^MYB08_ANTMA^Q:1-113,H:81-188^41.322%ID^E:1.73e-20^RecName: Full=Myb-related protein 308;^Eukaryota; Viridiplantae; Streptophyta; Embryophyta; Tracheophyta; Spermatophyta; Magnoliophyta; eudicotyledons; Gunneridae; Pentapetalae; asterids; lamiids; Lamiales; Plantaginaceae; Antirrhineae; Antirrhinum	PF00249.30^Myb_DNA-binding^Myb-like DNA-binding domain^1-32^E:9.6e-10	.	.	.	.	GO:0005634^cellular_component^nucleus`GO:0003677^molecular_function^DNA binding`GO:0006355^biological_process^regulation of transcription, DNA-templated`GO:0006351^biological_process^transcription, DNA-templated	.	.	.
TRINITY_DN100484_c0_g1	TRINITY_DN100484_c0_g1_i1	.	.	.	.	.	.	.	.	.	.	.	.	.	.
TRINITY_DN100417_c0_g1	TRINITY_DN100417_c0_g1_i1	.	.	.	.	.	.	.	.	.	.	.	.	.	.
TRINITY_DN100418_c0_g1	TRINITY_DN100418_c0_g1_i1	.	.	.	.	.	.	.	.	.	.	.	.	.	.
TRINITY_DN100462_c0_g1	TRINITY_DN100462_c0_g1_i1	.	.	TRINITY_DN100462_c0_g1_i1|m.130	1-399[+]	.	.	.	.	.	.	.	.	.	.
TRINITY_DN100437_c0_g1	TRINITY_DN100437_c0_g1_i1	.	.	.	.	.	.	.	.	.	.	.	.	.	.
TRINITY_DN100448_c0_g1	TRINITY_DN100448_c0_g1_i1	.	.	.	.	.	.	.	.	.	.	.	.	.	.
TRINITY_DN100480_c0_g1	TRINITY_DN100480_c0_g1_i1	.	.	.	.	.	.	.	.	.	.	.	.	.	.
TRINITY_DN100408_c0_g1	TRINITY_DN100408_c0_g1_i1	.	.	.	.	.	.	.	.	.	.	.	.	.	.
TRINITY_DN100425_c0_g1	TRINITY_DN100425_c0_g1_i1	.	.	.	.	.	.	.	.	.	.	.	.	.	.
TRINITY_DN100445_c0_g1	TRINITY_DN100445_c0_g1_i1	.	.	.	.	.	.	.	.	.	.	.	.	.	.
TRINITY_DN100467_c0_g1	TRINITY_DN100467_c0_g1_i1	.	.	TRINITY_DN100467_c0_g1_i1|m.131	3-329[+]	.	.	.	.	.	.	.	.	.	.
TRINITY_DN100468_c0_g1	TRINITY_DN100468_c0_g1_i1	.	.	.	.	.	.	.	.	.	.	.	.	.	.
TRINITY_DN100489_c0_g1	TRINITY_DN100489_c0_g1_i1	.	.	.	.	.	.	.	.	.	.	.	.	.	.
TRINITY_DN100471_c0_g1	TRINITY_DN100471_c0_g1_i1	.	.	.	.	.	.	.	.	.	.	.	.	.	.
TRINITY_DN100487_c0_g1	TRINITY_DN100487_c0_g1_i1	.	.	TRINITY_DN100487_c0_g1_i1|m.132	136-525[+]	.	.	.	.	.	.	.	.	.	.
TRINITY_DN100443_c0_g1	TRINITY_DN100443_c0_g1_i1	.	.	.	.	.	.	.	.	.	.	.	.	.	.
TRINITY_DN100449_c0_g1	TRINITY_DN100449_c0_g1_i1	.	.	.	.	.	.	.	.	.	.	.	.	.	.
TRINITY_DN100409_c0_g1	TRINITY_DN100409_c0_g1_i1	SYP22_ARATH^SYP22_ARATH^Q:247-552,H:1-106^66.981%ID^E:2.13e-40^RecName: Full=Syntaxin-22;^Eukaryota; Viridiplantae; Streptophyta; Embryophyta; Tracheophyta; Spermatophyta; Magnoliophyta; eudicotyledons; Gunneridae; Pentapetalae; rosids; malvids; Brassicales; Brassicaceae; Camelineae; Arabidopsis	.	TRINITY_DN100409_c0_g1_i1|m.133	247-552[+]	SYP22_ARATH^SYP22_ARATH^Q:1-102,H:1-106^66.981%ID^E:8.93e-42^RecName: Full=Syntaxin-22;^Eukaryota; Viridiplantae; Streptophyta; Embryophyta; Tracheophyta; Spermatophyta; Magnoliophyta; eudicotyledons; Gunneridae; Pentapetalae; rosids; malvids; Brassicales; Brassicaceae; Camelineae; Arabidopsis	PF14523.5^Syntaxin_2^Syntaxin-like protein^25-102^E:8.6e-19	.	.	COG5325^SYNtaxin	KEGG:ath:AT5G46860	GO:0016021^cellular_component^integral component of membrane`GO:0031902^cellular_component^late endosome membrane`GO:0000325^cellular_component^plant-type vacuole`GO:0009705^cellular_component^plant-type vacuole membrane`GO:0031201^cellular_component^SNARE complex`GO:0005773^cellular_component^vacuole`GO:0005484^molecular_function^SNAP receptor activity`GO:0000149^molecular_function^SNARE binding…	GO:0016020^cellular_component^membrane	.	.
TRINITY_DN100479_c0_g1	TRINITY_DN100479_c0_g1_i1	.	.	.	.	.	.	.	.	.	.	.	.	.	.
TRINITY_DN100410_c0_g1	TRINITY_DN100410_c0_g1_i1	.	.	.	.	.	.	.	.	.	.	.	.	.	.
TRINITY_DN100442_c0_g1	TRINITY_DN100442_c0_g1_i1	.	.	.	.	.	.	.	.	.	.	.	.	.	.
TRINITY_DN100486_c0_g1	TRINITY_DN100486_c0_g1_i1	.	.	.	.	.	.	.	.	.	.	.	.	.	.
TRINITY_DN100403_c0_g1	TRINITY_DN100403_c0_g1_i1	CYNS_PENRW^CYNS_PENRW^Q:1-129,H:118-160^88.372%ID^E:8.08e-20^RecName: Full=Cyanate hydratase {ECO:0000255|HAMAP-Rule:MF_03139};^Eukaryota; Fungi; Dikarya; Ascomycota; Pezizomycotina; Eurotiomycetes; Eurotiomycetidae; Eurotiales; Aspergillaceae; Penicillium; Penicillium chrysogenum species complex	.	.	.	.	.	.	.	COG1513^Catalyzes the reaction of cyanate with bicarbonate to produce ammonia and carbon dioxide (By similarity)	KEGG:pcs:Pc21g18920`KO:K01725	GO:0008824^molecular_function^cyanate hydratase activity`GO:0043565^molecular_function^sequence-specific DNA binding`GO:0009439^biological_process^cyanate metabolic process	.	.	.
TRINITY_DN100488_c0_g1	TRINITY_DN100488_c0_g1_i1	GET3_TALSN^GET3_TALSN^Q:3-161,H:289-340^75.472%ID^E:3.82e-18^RecName: Full=ATPase get3 {ECO:0000255|HAMAP-Rule:MF_03112};^Eukaryota; Fungi; Dikarya; Ascomycota; Pezizomycotina; Eurotiomycetes; Eurotiomycetidae; Eurotiales; Trichocomaceae; Talaromyces	.	.	.	.	.	.	.	COG0003^ATPase required for the post-translational delivery of tail-anchored (TA) proteins to the endoplasmic reticulum. Recognizes and selectively binds the transmembrane domain of TA proteins in the cytosol. This complex then targets to the endoplasmic reticulum by membrane-bound receptors, where the tail- anchored protein is released for insertion. This process is regulated by ATP binding and …	.	GO:0005783^cellular_component^endoplasmic reticulum`GO:0005524^molecular_function^ATP binding`GO:0016887^molecular_function^ATPase activity`GO:0046872^molecular_function^metal ion binding`GO:0006810^biological_process^transport	.	.	.
TRINITY_DN100406_c0_g1	TRINITY_DN100406_c0_g1_i1	.	.	.	.	.	.	.	.	.	.	.	.	.	.
TRINITY_DN100405_c0_g1	TRINITY_DN100405_c0_g1_i1	.	.	.	.	.	.	.	.	.	.	.	.	.	.
TRINITY_DN100427_c0_g1	TRINITY_DN100427_c0_g1_i1	.	.	TRINITY_DN100427_c0_g1_i1|m.134	691-26[-]	.	PF04434.16^SWIM^SWIM zinc finger^99-128^E:2.1e-09	.	.	.	.	.	GO:0008270^molecular_function^zinc ion binding	.	.
TRINITY_DN100415_c0_g1	TRINITY_DN100415_c0_g1_i1	.	.	.	.	.	.	.	.	.	.	.	.	.	.
TRINITY_DN100481_c0_g1	TRINITY_DN100481_c0_g1_i1	.	.	.	.	.	.	.	.	.	.	.	.	.	.
TRINITY_DN100431_c0_g1	TRINITY_DN100431_c0_g1_i1	.	.	.	.	.	.	.	.	.	.	.	.	.	.
TRINITY_DN100412_c0_g1	TRINITY_DN100412_c0_g1_i1	.	.	.	.	.	.	.	.	.	.	.	.	.	.
TRINITY_DN100434_c0_g1	TRINITY_DN100434_c0_g1_i1	PAL3_TOBAC^PAL3_TOBAC^Q:435-1,H:164-308^90.345%ID^E:2.35e-89^RecName: Full=Phenylalanine ammonia-lyase;^Eukaryota; Viridiplantae; Streptophyta; Embryophyta; Tracheophyta; Spermatophyta; Magnoliophyta; eudicotyledons; Gunneridae; Pentapetalae; asterids; lamiids; Solanales; Solanaceae; Nicotianoideae; Nicotianeae; Nicotiana	.	TRINITY_DN100434_c0_g1_i1|m.135	435-1[-]	PAL3_TOBAC^PAL3_TOBAC^Q:1-145,H:164-308^90.345%ID^E:2.11e-89^RecName: Full=Phenylalanine ammonia-lyase;^Eukaryota; Viridiplantae; Streptophyta; Embryophyta; Tracheophyta; Spermatophyta; Magnoliophyta; eudicotyledons; Gunneridae; Pentapetalae; asterids; lamiids; Solanales; Solanaceae; Nicotianoideae; Nicotianeae; Nicotiana	PF00221.18^Lyase_aromatic^Aromatic amino acid lyase^1-145^E:2.1e-44	.	.	.	KEGG:nta:107792668`KO:K10775	GO:0005737^cellular_component^cytoplasm`GO:0045548^molecular_function^phenylalanine ammonia-lyase activity`GO:0009800^biological_process^cinnamic acid biosynthetic process`GO:0006559^biological_process^L-phenylalanine catabolic process	.	.	.
TRINITY_DN100434_c0_g1	TRINITY_DN100434_c0_g1_i1	PAL3_TOBAC^PAL3_TOBAC^Q:435-1,H:164-308^90.345%ID^E:2.35e-89^RecName: Full=Phenylalanine ammonia-lyase;^Eukaryota; Viridiplantae; Streptophyta; Embryophyta; Tracheophyta; Spermatophyta; Magnoliophyta; eudicotyledons; Gunneridae; Pentapetalae; asterids; lamiids; Solanales; Solanaceae; Nicotianoideae; Nicotianeae; Nicotiana	.	TRINITY_DN100434_c0_g1_i1|m.136	2-307[+]	.	.	.	.	.	.	.	.	.	.
TRINITY_DN100463_c0_g1	TRINITY_DN100463_c0_g1_i1	.	.	.	.	.	.	.	.	.	.	.	.	.	.
TRINITY_DN100422_c0_g2	TRINITY_DN100422_c0_g2_i1	.	.	TRINITY_DN100422_c0_g2_i1|m.137	575-222[-]	.	.	.	.	.	.	.	.	.	.
TRINITY_DN100439_c0_g1	TRINITY_DN100439_c0_g1_i1	VSR4_ARATH^VSR4_ARATH^Q:3-101,H:75-107^75.758%ID^E:2.72e-10^RecName: Full=Vacuolar-sorting receptor 4;^Eukaryota; Viridiplantae; Streptophyta; Embryophyta; Tracheophyta; Spermatophyta; Magnoliophyta; eudicotyledons; Gunneridae; Pentapetalae; rosids; malvids; Brassicales; Brassicaceae; Camelineae; Arabidopsis	.	TRINITY_DN100439_c0_g1_i1|m.138	307-2[-]	.	.	.	.	.	.	.	.	.	.
TRINITY_DN100483_c0_g1	TRINITY_DN100483_c0_g1_i1	SUT31_ARATH^SUT31_ARATH^Q:2-94,H:273-303^77.419%ID^E:2.89e-08^RecName: Full=Sulfate transporter 3.1;^Eukaryota; Viridiplantae; Streptophyta; Embryophyta; Tracheophyta; Spermatophyta; Magnoliophyta; eudicotyledons; Gunneridae; Pentapetalae; rosids; malvids; Brassicales; Brassicaceae; Camelineae; Arabidopsis	.	.	.	.	.	.	.	COG0659^sulfate transporter	KEGG:ath:AT3G51895`KO:K17471	GO:0009507^cellular_component^chloroplast`GO:0005887^cellular_component^integral component of plasma membrane`GO:0008271^molecular_function^secondary active sulfate transmembrane transporter activity`GO:0015116^molecular_function^sulfate transmembrane transporter activity`GO:0015293^molecular_function^symporter activity`GO:0008272^biological_process^sulfate transport	.	.	.
TRINITY_DN100450_c0_g1	TRINITY_DN100450_c0_g1_i1	.	.	.	.	.	.	.	.	.	.	.	.	.	.
TRINITY_DN100469_c0_g1	TRINITY_DN100469_c0_g1_i1	.	.	.	.	.	.	.	.	.	.	.	.	.	.
TRINITY_DN100438_c0_g1	TRINITY_DN100438_c0_g1_i1	.	.	.	.	.	.	.	.	.	.	.	.	.	.
TRINITY_DN100497_c0_g1	TRINITY_DN100497_c0_g1_i1	.	.	.	.	.	.	.	.	.	.	.	.	.	.
TRINITY_DN108063_c0_g1	TRINITY_DN108063_c0_g1_i1	.	.	.	.	.	.	.	.	.	.	.	.	.	.
TRINITY_DN108013_c0_g1	TRINITY_DN108013_c0_g1_i1	.	.	.	.	.	.	.	.	.	.	.	.	.	.
TRINITY_DN108099_c0_g1	TRINITY_DN108099_c0_g1_i1	KNOS2_ORYSJ^KNOS2_ORYSJ^Q:986-1063,H:109-134^96.154%ID^E:2.07e-07^RecName: Full=Homeobox protein knotted-1-like 2;^Eukaryota; Viridiplantae; Streptophyta; Embryophyta; Tracheophyta; Spermatophyta; Magnoliophyta; Liliopsida; Poales; Poaceae; BOP clade; Oryzoideae; Oryzeae; Oryzinae; Oryza; Oryza sativa	.	.	.	.	.	.	.	ENOG410XPMQ^homeobox	KEGG:osa:4328520	GO:0005634^cellular_component^nucleus`GO:0003677^molecular_function^DNA binding`GO:0006355^biological_process^regulation of transcription, DNA-templated	.	.	.
TRINITY_DN108043_c0_g1	TRINITY_DN108043_c0_g1_i1	KPRS3_ARATH^KPRS3_ARATH^Q:610-242,H:13-133^41.085%ID^E:1.32e-11^RecName: Full=Ribose-phosphate pyrophosphokinase 3, chloroplastic;^Eukaryota; Viridiplantae; Streptophyta; Embryophyta; Tracheophyta; Spermatophyta; Magnoliophyta; eudicotyledons; Gunneridae; Pentapetalae; rosids; malvids; Brassicales; Brassicaceae; Camelineae; Arabidopsis	.	TRINITY_DN108043_c0_g1_i1|m.139	212-607[+]	.	.	.	.	.	.	.	.	.	.
TRINITY_DN108043_c0_g1	TRINITY_DN108043_c0_g1_i1	KPRS3_ARATH^KPRS3_ARATH^Q:610-242,H:13-133^41.085%ID^E:1.32e-11^RecName: Full=Ribose-phosphate pyrophosphokinase 3, chloroplastic;^Eukaryota; Viridiplantae; Streptophyta; Embryophyta; Tracheophyta; Spermatophyta; Magnoliophyta; eudicotyledons; Gunneridae; Pentapetalae; rosids; malvids; Brassicales; Brassicaceae; Camelineae; Arabidopsis	.	TRINITY_DN108043_c0_g1_i1|m.140	637-245[-]	KPRS3_ARATH^KPRS3_ARATH^Q:10-130,H:13-131^40.945%ID^E:4.24e-15^RecName: Full=Ribose-phosphate pyrophosphokinase 3, chloroplastic;^Eukaryota; Viridiplantae; Streptophyta; Embryophyta; Tracheophyta; Spermatophyta; Magnoliophyta; eudicotyledons; Gunneridae; Pentapetalae; rosids; malvids; Brassicales; Brassicaceae; Camelineae; Arabidopsis	.	.	.	COG0462^Phosphoribosyl pyrophosphate synthase	KEGG:ath:AT1G10700	GO:0009507^cellular_component^chloroplast`GO:0005524^molecular_function^ATP binding`GO:0016301^molecular_function^kinase activity`GO:0000287^molecular_function^magnesium ion binding`GO:0004749^molecular_function^ribose phosphate diphosphokinase activity`GO:0009116^biological_process^nucleoside metabolic process`GO:0009165^biological_process^nucleotide biosynthetic process	.	.	.
TRINITY_DN108043_c0_g1	TRINITY_DN108043_c0_g1_i1	KPRS3_ARATH^KPRS3_ARATH^Q:610-242,H:13-133^41.085%ID^E:1.32e-11^RecName: Full=Ribose-phosphate pyrophosphokinase 3, chloroplastic;^Eukaryota; Viridiplantae; Streptophyta; Embryophyta; Tracheophyta; Spermatophyta; Magnoliophyta; eudicotyledons; Gunneridae; Pentapetalae; rosids; malvids; Brassicales; Brassicaceae; Camelineae; Arabidopsis	.	TRINITY_DN108043_c0_g1_i1|m.141	366-731[+]	.	.	.	.	.	.	.	.	.	.
TRINITY_DN108070_c0_g1	TRINITY_DN108070_c0_g1_i1	.	.	TRINITY_DN108070_c0_g1_i1|m.142	512-1039[+]	.	PF04783.11^DUF630^Protein of unknown function (DUF630)^1-59^E:1.2e-26	.	.	.	.	.	.	.	.
TRINITY_DN108070_c0_g1	TRINITY_DN108070_c0_g1_i1	.	.	TRINITY_DN108070_c0_g1_i1|m.143	1040-645[-]	.	.	sigP:1^35^0.881^YES	ExpAA=19.08^PredHel=1^Topology=i12-29o	.	.	.	.	.	.
TRINITY_DN108005_c0_g1	TRINITY_DN108005_c0_g1_i1	.	.	.	.	.	.	.	.	.	.	.	.	.	.
TRINITY_DN108044_c0_g1	TRINITY_DN108044_c0_g1_i1	.	.	TRINITY_DN108044_c0_g1_i1|m.144	1-315[+]	.	.	.	.	.	.	.	.	.	.
TRINITY_DN108080_c0_g1	TRINITY_DN108080_c0_g1_i1	RTNLC_ARATH^RTNLC_ARATH^Q:1-93,H:142-172^74.194%ID^E:1.75e-06^RecName: Full=Reticulon-like protein B3;^Eukaryota; Viridiplantae; Streptophyta; Embryophyta; Tracheophyta; Spermatophyta; Magnoliophyta; eudicotyledons; Gunneridae; Pentapetalae; rosids; malvids; Brassicales; Brassicaceae; Camelineae; Arabidopsis	.	TRINITY_DN108080_c0_g1_i1|m.145	326-3[-]	.	.	.	.	.	.	.	.	.	.
TRINITY_DN108086_c0_g1	TRINITY_DN108086_c0_g1_i1	.	.	.	.	.	.	.	.	.	.	.	.	.	.
TRINITY_DN108056_c0_g1	TRINITY_DN108056_c0_g1_i1	.	.	.	.	.	.	.	.	.	.	.	.	.	.
TRINITY_DN108060_c0_g1	TRINITY_DN108060_c0_g1_i1	.	.	.	.	.	.	.	.	.	.	.	.	.	.
TRINITY_DN108071_c0_g1	TRINITY_DN108071_c0_g1_i1	.	.	.	.	.	.	.	.	.	.	.	.	.	.
TRINITY_DN108027_c0_g1	TRINITY_DN108027_c0_g1_i1	.	.	TRINITY_DN108027_c0_g1_i1|m.146	2-334[+]	.	.	.	ExpAA=52.22^PredHel=2^Topology=o20-42i69-91o	.	.	.	.	.	.
TRINITY_DN108046_c0_g1	TRINITY_DN108046_c0_g1_i1	.	.	.	.	.	.	.	.	.	.	.	.	.	.
TRINITY_DN108036_c0_g1	TRINITY_DN108036_c0_g1_i1	PMA6_ARATH^PMA6_ARATH^Q:2-403,H:349-482^77.612%ID^E:3.81e-65^RecName: Full=ATPase 6, plasma membrane-type;^Eukaryota; Viridiplantae; Streptophyta; Embryophyta; Tracheophyta; Spermatophyta; Magnoliophyta; eudicotyledons; Gunneridae; Pentapetalae; rosids; malvids; Brassicales; Brassicaceae; Camelineae; Arabidopsis	.	TRINITY_DN108036_c0_g1_i1|m.147	2-403[+]	PMA6_ARATH^PMA6_ARATH^Q:1-134,H:349-482^77.612%ID^E:4.32e-70^RecName: Full=ATPase 6, plasma membrane-type;^Eukaryota; Viridiplantae; Streptophyta; Embryophyta; Tracheophyta; Spermatophyta; Magnoliophyta; eudicotyledons; Gunneridae; Pentapetalae; rosids; malvids; Brassicales; Brassicaceae; Camelineae; Arabidopsis	PF13246.5^Cation_ATPase^Cation transport ATPase (P-type)^28-89^E:1.3e-05	.	.	COG0474^P-type atpase	KEGG:ath:AT2G07560`KO:K01535	GO:0016021^cellular_component^integral component of membrane`GO:0016020^cellular_component^membrane`GO:0005886^cellular_component^plasma membrane`GO:0005524^molecular_function^ATP binding`GO:0008553^molecular_function^hydrogen-exporting ATPase activity, phosphorylative mechanism`GO:0046872^molecular_function^metal ion binding`GO:0006754^biological_process^ATP biosynthetic process	.	.	.
TRINITY_DN108036_c0_g1	TRINITY_DN108036_c0_g1_i1	PMA6_ARATH^PMA6_ARATH^Q:2-403,H:349-482^77.612%ID^E:3.81e-65^RecName: Full=ATPase 6, plasma membrane-type;^Eukaryota; Viridiplantae; Streptophyta; Embryophyta; Tracheophyta; Spermatophyta; Magnoliophyta; eudicotyledons; Gunneridae; Pentapetalae; rosids; malvids; Brassicales; Brassicaceae; Camelineae; Arabidopsis	.	TRINITY_DN108036_c0_g1_i1|m.148	3-404[+]	.	.	.	.	.	.	.	.	.	.
TRINITY_DN108036_c0_g1	TRINITY_DN108036_c0_g1_i1	PMA6_ARATH^PMA6_ARATH^Q:2-403,H:349-482^77.612%ID^E:3.81e-65^RecName: Full=ATPase 6, plasma membrane-type;^Eukaryota; Viridiplantae; Streptophyta; Embryophyta; Tracheophyta; Spermatophyta; Magnoliophyta; eudicotyledons; Gunneridae; Pentapetalae; rosids; malvids; Brassicales; Brassicaceae; Camelineae; Arabidopsis	.	TRINITY_DN108036_c0_g1_i1|m.149	403-95[-]	.	.	.	.	.	.	.	.	.	.
TRINITY_DN108023_c0_g2	TRINITY_DN108023_c0_g2_i1	SCW1_SCHPO^SCW1_SCHPO^Q:356-556,H:422-488^40.299%ID^E:2.94e-10^RecName: Full=Cell wall integrity protein scw1;^Eukaryota; Fungi; Dikarya; Ascomycota; Taphrinomycotina; Schizosaccharomycetes; Schizosaccharomycetales; Schizosaccharomycetaceae; Schizosaccharomyces	.	.	.	.	.	.	.	.	KEGG:spo:SPCC16C4.07	GO:0005737^cellular_component^cytoplasm`GO:0003723^molecular_function^RNA binding`GO:0032995^biological_process^regulation of fungal-type cell wall biogenesis	.	.	.
TRINITY_DN108087_c0_g1	TRINITY_DN108087_c0_g1_i1	.	.	.	.	.	.	.	.	.	.	.	.	.	.
TRINITY_DN108019_c0_g1	TRINITY_DN108019_c0_g1_i1	.	.	TRINITY_DN108019_c0_g1_i1|m.150	1-315[+]	.	.	.	.	.	.	.	.	.	.
TRINITY_DN108083_c0_g1	TRINITY_DN108083_c0_g1_i1	.	.	.	.	.	.	.	.	.	.	.	.	.	.
TRINITY_DN108072_c0_g1	TRINITY_DN108072_c0_g1_i1	BIN4_ARATH^BIN4_ARATH^Q:359-463,H:277-311^65.714%ID^E:5.5e-07^RecName: Full=DNA-binding protein BIN4;^Eukaryota; Viridiplantae; Streptophyta; Embryophyta; Tracheophyta; Spermatophyta; Magnoliophyta; eudicotyledons; Gunneridae; Pentapetalae; rosids; malvids; Brassicales; Brassicaceae; Camelineae; Arabidopsis	.	TRINITY_DN108072_c0_g1_i1|m.151	465-130[-]	.	.	.	.	.	.	.	.	.	.
TRINITY_DN108065_c0_g1	TRINITY_DN108065_c0_g1_i1	.	.	.	.	.	.	.	.	.	.	.	.	.	.
TRINITY_DN108002_c0_g1	TRINITY_DN108002_c0_g1_i1	TRP4_ARATH^TRP4_ARATH^Q:436-561,H:370-411^61.905%ID^E:2.02e-10^RecName: Full=Telomere repeat-binding protein 4;^Eukaryota; Viridiplantae; Streptophyta; Embryophyta; Tracheophyta; Spermatophyta; Magnoliophyta; eudicotyledons; Gunneridae; Pentapetalae; rosids; malvids; Brassicales; Brassicaceae; Camelineae; Arabidopsis	.	.	.	.	.	.	.	ENOG4111C5T^Telomere repeat-binding protein	KEGG:ath:AT5G13820	GO:0000781^cellular_component^chromosome, telomeric region`GO:0000783^cellular_component^nuclear telomere cap complex`GO:0003677^molecular_function^DNA binding`GO:0003691^molecular_function^double-stranded telomeric DNA binding`GO:0042162^molecular_function^telomeric DNA binding`GO:0006355^biological_process^regulation of transcription, DNA-templated`GO:0000723^biological_process^telomere mainten…	.	.	.
TRINITY_DN108040_c0_g1	TRINITY_DN108040_c0_g1_i1	.	.	.	.	.	.	.	.	.	.	.	.	.	.
TRINITY_DN108015_c0_g1	TRINITY_DN108015_c0_g1_i1	CID10_ARATH^CID10_ARATH^Q:87-530,H:1-121^30.872%ID^E:6.78e-06^RecName: Full=Polyadenylate-binding protein-interacting protein 10;^Eukaryota; Viridiplantae; Streptophyta; Embryophyta; Tracheophyta; Spermatophyta; Magnoliophyta; eudicotyledons; Gunneridae; Pentapetalae; rosids; malvids; Brassicales; Brassicaceae; Camelineae; Arabidopsis	.	TRINITY_DN108015_c0_g1_i1|m.152	87-530[+]	CID10_ARATH^CID10_ARATH^Q:1-148,H:1-121^30.872%ID^E:3.32e-06^RecName: Full=Polyadenylate-binding protein-interacting protein 10;^Eukaryota; Viridiplantae; Streptophyta; Embryophyta; Tracheophyta; Spermatophyta; Magnoliophyta; eudicotyledons; Gunneridae; Pentapetalae; rosids; malvids; Brassicales; Brassicaceae; Camelineae; Arabidopsis	PF07145.14^PAM2^Ataxin-2 C-terminal region^123-136^E:1.5e-05	.	.	COG0724^Rna-binding protein	KEGG:ath:AT3G49390	GO:0005634^cellular_component^nucleus`GO:0003729^molecular_function^mRNA binding	.	.	.
TRINITY_DN108061_c0_g1	TRINITY_DN108061_c0_g1_i1	.	.	.	.	.	.	.	.	.	.	.	.	.	.
TRINITY_DN108020_c0_g1	TRINITY_DN108020_c0_g1_i1	.	.	.	.	.	.	.	.	.	.	.	.	.	.
TRINITY_DN108008_c0_g1	TRINITY_DN108008_c0_g1_i1	.	.	TRINITY_DN108008_c0_g1_i1|m.153	2-826[+]	.	.	.	.	.	.	.	.	.	.
TRINITY_DN108008_c0_g1	TRINITY_DN108008_c0_g1_i1	.	.	TRINITY_DN108008_c0_g1_i1|m.154	435-827[+]	.	.	.	ExpAA=55.91^PredHel=3^Topology=i9-31o46-68i100-122o	.	.	.	.	.	.
TRINITY_DN108075_c0_g1	TRINITY_DN108075_c0_g1_i1	.	.	TRINITY_DN108075_c0_g1_i1|m.155	2-364[+]	.	.	.	.	.	.	.	.	.	.
TRINITY_DN108075_c0_g1	TRINITY_DN108075_c0_g1_i1	.	.	TRINITY_DN108075_c0_g1_i1|m.156	3-365[+]	.	.	.	.	.	.	.	.	.	.
TRINITY_DN108075_c0_g1	TRINITY_DN108075_c0_g1_i1	.	.	TRINITY_DN108075_c0_g1_i1|m.157	364-47[-]	.	.	.	ExpAA=21.32^PredHel=1^Topology=i78-100o	.	.	.	.	.	.
TRINITY_DN108009_c0_g1	TRINITY_DN108009_c0_g1_i1	BCAT2_HUMLU^BCAT2_HUMLU^Q:3-68,H:207-228^100%ID^E:1.12e-06^RecName: Full=Branched-chain amino acid aminotransferase 2, chloroplastic {ECO:0000303|PubMed:23347725};^Eukaryota; Viridiplantae; Streptophyta; Embryophyta; Tracheophyta; Spermatophyta; Magnoliophyta; eudicotyledons; Gunneridae; Pentapetalae; rosids; fabids; Rosales; Cannabaceae; Humulus	.	.	.	.	.	.	.	.	.	GO:0009507^cellular_component^chloroplast`GO:0052656^molecular_function^L-isoleucine transaminase activity`GO:0052654^molecular_function^L-leucine transaminase activity`GO:0052655^molecular_function^L-valine transaminase activity`GO:0009097^biological_process^isoleucine biosynthetic process`GO:0009098^biological_process^leucine biosynthetic process`GO:0009099^biological_process^valine biosyntheti…	.	.	.
TRINITY_DN108051_c0_g1	TRINITY_DN108051_c0_g1_i1	MYB33_ARATH^MYB33_ARATH^Q:1-681,H:119-346^41.702%ID^E:2.23e-41^RecName: Full=Transcription factor MYB33 {ECO:0000303|PubMed:11597504};^Eukaryota; Viridiplantae; Streptophyta; Embryophyta; Tracheophyta; Spermatophyta; Magnoliophyta; eudicotyledons; Gunneridae; Pentapetalae; rosids; malvids; Brassicales; Brassicaceae; Camelineae; Arabidopsis	.	TRINITY_DN108051_c0_g1_i1|m.158	1-681[+]	MYB33_ARATH^MYB33_ARATH^Q:1-227,H:119-346^41.702%ID^E:2.01e-41^RecName: Full=Transcription factor MYB33 {ECO:0000303|PubMed:11597504};^Eukaryota; Viridiplantae; Streptophyta; Embryophyta; Tracheophyta; Spermatophyta; Magnoliophyta; eudicotyledons; Gunneridae; Pentapetalae; rosids; malvids; Brassicales; Brassicaceae; Camelineae; Arabidopsis	.	.	.	COG5147^Myblike DNAbinding domain containing protein	KEGG:ath:AT5G06100`KO:K09422	GO:0005634^cellular_component^nucleus`GO:0000981^molecular_function^RNA polymerase II transcription factor activity, sequence-specific DNA binding`GO:0043565^molecular_function^sequence-specific DNA binding`GO:0001135^molecular_function^transcription factor activity, RNA polymerase II transcription factor recruiting`GO:0003700^molecular_function^DNA binding transcription factor activity`GO:004421…	.	.	.
TRINITY_DN108088_c0_g1	TRINITY_DN108088_c0_g1_i1	BTGE_ASPFU^BTGE_ASPFU^Q:1-354,H:435-551^55.932%ID^E:8.54e-27^RecName: Full=Probable beta-glucosidase btgE;^Eukaryota; Fungi; Dikarya; Ascomycota; Pezizomycotina; Eurotiomycetes; Eurotiomycetidae; Eurotiales; Aspergillaceae; Aspergillus	.	TRINITY_DN108088_c0_g1_i1|m.159	1-354[+]	BTGE_ASPFU^BTGE_ASPFU^Q:1-118,H:435-551^55.932%ID^E:1.95e-37^RecName: Full=Probable beta-glucosidase btgE;^Eukaryota; Fungi; Dikarya; Ascomycota; Pezizomycotina; Eurotiomycetes; Eurotiomycetidae; Eurotiales; Aspergillaceae; Aspergillus	.	.	.	.	KEGG:afm:AFUA_8G05610	GO:0005618^cellular_component^cell wall`GO:0005576^cellular_component^extracellular region`GO:0008422^molecular_function^beta-glucosidase activity`GO:0102483^molecular_function^scopolin beta-glucosidase activity`GO:0030245^biological_process^cellulose catabolic process	.	.	.
TRINITY_DN108088_c0_g1	TRINITY_DN108088_c0_g1_i1	BTGE_ASPFU^BTGE_ASPFU^Q:1-354,H:435-551^55.932%ID^E:8.54e-27^RecName: Full=Probable beta-glucosidase btgE;^Eukaryota; Fungi; Dikarya; Ascomycota; Pezizomycotina; Eurotiomycetes; Eurotiomycetidae; Eurotiales; Aspergillaceae; Aspergillus	.	TRINITY_DN108088_c0_g1_i1|m.160	354-1[-]	.	.	.	.	.	.	.	.	.	.
TRINITY_DN108039_c0_g1	TRINITY_DN108039_c0_g1_i1	.	.	.	.	.	.	.	.	.	.	.	.	.	.
TRINITY_DN108052_c0_g1	TRINITY_DN108052_c0_g1_i1	SALAT_PAPSO^SALAT_PAPSO^Q:3-404,H:34-167^36.029%ID^E:1.01e-19^RecName: Full=Salutaridinol 7-O-acetyltransferase {ECO:0000303|PubMed:11404355};^Eukaryota; Viridiplantae; Streptophyta; Embryophyta; Tracheophyta; Spermatophyta; Magnoliophyta; eudicotyledons; Ranunculales; Papaveraceae; Papaveroideae; Papaver	.	TRINITY_DN108052_c0_g1_i1|m.161	3-404[+]	SALAT_PAPSO^SALAT_PAPSO^Q:1-134,H:34-167^36.029%ID^E:9.06e-20^RecName: Full=Salutaridinol 7-O-acetyltransferase {ECO:0000303|PubMed:11404355};^Eukaryota; Viridiplantae; Streptophyta; Embryophyta; Tracheophyta; Spermatophyta; Magnoliophyta; eudicotyledons; Ranunculales; Papaveraceae; Papaveroideae; Papaver	PF02458.14^Transferase^Transferase family^2-134^E:1.6e-27	.	.	.	KEGG:ag:AAK73661`KO:K13393	GO:0047180^molecular_function^salutaridinol 7-O-acetyltransferase activity`GO:0009820^biological_process^alkaloid metabolic process	GO:0016747^molecular_function^transferase activity, transferring acyl groups other than amino-acyl groups	.	.
TRINITY_DN108042_c0_g1	TRINITY_DN108042_c0_g1_i1	.	.	.	.	.	.	.	.	.	.	.	.	.	.
TRINITY_DN108041_c0_g1	TRINITY_DN108041_c0_g1_i1	.	.	.	.	.	.	.	.	.	.	.	.	.	.
TRINITY_DN108031_c0_g1	TRINITY_DN108031_c0_g1_i1	.	.	.	.	.	.	.	.	.	.	.	.	.	.
TRINITY_DN108073_c0_g1	TRINITY_DN108073_c0_g1_i1	.	.	.	.	.	.	.	.	.	.	.	.	.	.
TRINITY_DN108030_c0_g1	TRINITY_DN108030_c0_g1_i1	RPT3_ARATH^RPT3_ARATH^Q:1-405,H:533-687^43.226%ID^E:2.21e-28^RecName: Full=Root phototropism protein 3;^Eukaryota; Viridiplantae; Streptophyta; Embryophyta; Tracheophyta; Spermatophyta; Magnoliophyta; eudicotyledons; Gunneridae; Pentapetalae; rosids; malvids; Brassicales; Brassicaceae; Camelineae; Arabidopsis	.	TRINITY_DN108030_c0_g1_i1|m.162	1-627[+]	RPT3_ARATH^RPT3_ARATH^Q:1-135,H:533-687^43.226%ID^E:2.41e-29^RecName: Full=Root phototropism protein 3;^Eukaryota; Viridiplantae; Streptophyta; Embryophyta; Tracheophyta; Spermatophyta; Magnoliophyta; eudicotyledons; Gunneridae; Pentapetalae; rosids; malvids; Brassicales; Brassicaceae; Camelineae; Arabidopsis	PF03000.13^NPH3^NPH3 family^1-49^E:5.2e-21	.	.	ENOG41110QX^cellular response to blue light	KEGG:ath:AT5G64330	GO:0005886^cellular_component^plasma membrane`GO:0004871^molecular_function^signal transducer activity`GO:0009638^biological_process^phototropism`GO:0016567^biological_process^protein ubiquitination	.	.	.
TRINITY_DN108076_c0_g1	TRINITY_DN108076_c0_g1_i1	GCY1_YEAST^GCY1_YEAST^Q:1-354,H:101-234^44.776%ID^E:2.9e-34^RecName: Full=Glycerol 2-dehydrogenase (NADP(+));^Eukaryota; Fungi; Dikarya; Ascomycota; Saccharomycotina; Saccharomycetes; Saccharomycetales; Saccharomycetaceae; Saccharomyces	.	TRINITY_DN108076_c0_g1_i1|m.163	1-354[+]	GCY1_YEAST^GCY1_YEAST^Q:1-118,H:101-234^44.776%ID^E:2.61e-34^RecName: Full=Glycerol 2-dehydrogenase (NADP(+));^Eukaryota; Fungi; Dikarya; Ascomycota; Saccharomycotina; Saccharomycetes; Saccharomycetales; Saccharomycetaceae; Saccharomyces	PF00248.20^Aldo_ket_red^Aldo/keto reductase family^1-108^E:8.9e-20	.	.	.	KEGG:sce:YOR120W`KO:K18097	GO:0005737^cellular_component^cytoplasm`GO:0004032^molecular_function^alditol:NADP+ 1-oxidoreductase activity`GO:0004033^molecular_function^aldo-keto reductase (NADP) activity`GO:0047953^molecular_function^glycerol 2-dehydrogenase (NADP+) activity`GO:1990042^molecular_function^glycerol dehydrogenase [NAD(P)+] activity`GO:0003729^molecular_function^mRNA binding`GO:0016491^molecular_function^oxidor…	.	.	.
TRINITY_DN108076_c0_g1	TRINITY_DN108076_c0_g1_i1	GCY1_YEAST^GCY1_YEAST^Q:1-354,H:101-234^44.776%ID^E:2.9e-34^RecName: Full=Glycerol 2-dehydrogenase (NADP(+));^Eukaryota; Fungi; Dikarya; Ascomycota; Saccharomycotina; Saccharomycetes; Saccharomycetales; Saccharomycetaceae; Saccharomyces	.	TRINITY_DN108076_c0_g1_i1|m.164	3-356[+]	.	.	.	.	.	.	.	.	.	.
TRINITY_DN108076_c0_g1	TRINITY_DN108076_c0_g1_i1	GCY1_YEAST^GCY1_YEAST^Q:1-354,H:101-234^44.776%ID^E:2.9e-34^RecName: Full=Glycerol 2-dehydrogenase (NADP(+));^Eukaryota; Fungi; Dikarya; Ascomycota; Saccharomycotina; Saccharomycetes; Saccharomycetales; Saccharomycetaceae; Saccharomyces	.	TRINITY_DN108076_c0_g1_i1|m.165	354-1[-]	.	.	.	.	.	.	.	.	.	.
TRINITY_DN108064_c0_g1	TRINITY_DN108064_c0_g1_i1	.	.	TRINITY_DN108064_c0_g1_i1|m.166	439-110[-]	.	.	.	.	.	.	.	.	.	.
TRINITY_DN108048_c0_g1	TRINITY_DN108048_c0_g1_i1	.	.	.	.	.	.	.	.	.	.	.	.	.	.
TRINITY_DN108032_c0_g1	TRINITY_DN108032_c0_g1_i1	.	.	.	.	.	.	.	.	.	.	.	.	.	.
TRINITY_DN108001_c0_g1	TRINITY_DN108001_c0_g1_i1	.	.	TRINITY_DN108001_c0_g1_i1|m.167	329-3[-]	.	.	.	.	.	.	.	.	.	.
TRINITY_DN108078_c0_g1	TRINITY_DN108078_c0_g1_i1	DR111_ARATH^DR111_ARATH^Q:449-87,H:1-121^59.524%ID^E:1.1e-25^RecName: Full=DNA-damage-repair/toleration protein DRT111, chloroplastic {ECO:0000303|PubMed:8479917};^Eukaryota; Viridiplantae; Streptophyta; Embryophyta; Tracheophyta; Spermatophyta; Magnoliophyta; eudicotyledons; Gunneridae; Pentapetalae; rosids; malvids; Brassicales; Brassicaceae; Camelineae; Arabidopsis	.	TRINITY_DN108078_c0_g1_i1|m.168	506-3[-]	DR111_ARATH^DR111_ARATH^Q:20-154,H:1-135^59.286%ID^E:6.95e-34^RecName: Full=DNA-damage-repair/toleration protein DRT111, chloroplastic {ECO:0000303|PubMed:8479917};^Eukaryota; Viridiplantae; Streptophyta; Embryophyta; Tracheophyta; Spermatophyta; Magnoliophyta; eudicotyledons; Gunneridae; Pentapetalae; rosids; malvids; Brassicales; Brassicaceae; Camelineae; Arabidopsis	.	.	.	ENOG410XWJ5^RNA binding motif protein 17	KEGG:ath:AT1G30480`KO:K12840	GO:0009507^cellular_component^chloroplast`GO:0005737^cellular_component^cytoplasm`GO:0005634^cellular_component^nucleus`GO:0003723^molecular_function^RNA binding`GO:0006281^biological_process^DNA repair`GO:0006397^biological_process^mRNA processing`GO:0043484^biological_process^regulation of RNA splicing`GO:0008380^biological_process^RNA splicing	.	.	.
TRINITY_DN108089_c0_g1	TRINITY_DN108089_c0_g1_i1	.	.	.	.	.	.	.	.	.	.	.	.	.	.
TRINITY_DN108074_c0_g1	TRINITY_DN108074_c0_g1_i1	.	.	.	.	.	.	.	.	.	.	.	.	.	.
TRINITY_DN108029_c0_g1	TRINITY_DN108029_c0_g1_i1	.	.	TRINITY_DN108029_c0_g1_i1|m.169	355-53[-]	.	.	.	.	.	.	.	.	.	.
TRINITY_DN108014_c0_g1	TRINITY_DN108014_c0_g1_i1	.	.	TRINITY_DN108014_c0_g1_i1|m.170	413-24[-]	.	.	.	.	.	.	.	.	.	.
TRINITY_DN108007_c0_g1	TRINITY_DN108007_c0_g1_i1	.	.	.	.	.	.	.	.	.	.	.	.	.	.
TRINITY_DN108079_c0_g1	TRINITY_DN108079_c0_g1_i1	.	.	.	.	.	.	.	.	.	.	.	.	.	.
TRINITY_DN108085_c0_g1	TRINITY_DN108085_c0_g1_i1	.	.	.	.	.	.	.	.	.	.	.	.	.	.
TRINITY_DN108055_c0_g1	TRINITY_DN108055_c0_g1_i1	.	.	.	.	.	.	.	.	.	.	.	.	.	.
TRINITY_DN108098_c0_g1	TRINITY_DN108098_c0_g1_i1	.	.	.	.	.	.	.	.	.	.	.	.	.	.
TRINITY_DN130296_c0_g1	TRINITY_DN130296_c0_g1_i1	.	.	.	.	.	.	.	.	.	.	.	.	.	.
TRINITY_DN130264_c0_g1	TRINITY_DN130264_c0_g1_i1	.	.	.	.	.	.	.	.	.	.	.	.	.	.
TRINITY_DN130274_c0_g1	TRINITY_DN130274_c0_g1_i1	.	.	.	.	.	.	.	.	.	.	.	.	.	.
TRINITY_DN130229_c0_g1	TRINITY_DN130229_c0_g1_i1	.	.	.	.	.	.	.	.	.	.	.	.	.	.
TRINITY_DN130261_c0_g1	TRINITY_DN130261_c0_g1_i1	.	.	.	.	.	.	.	.	.	.	.	.	.	.
TRINITY_DN130235_c0_g1	TRINITY_DN130235_c0_g1_i1	PSB3B_ARATH^PSB3B_ARATH^Q:2-139,H:73-121^63.265%ID^E:2.8e-11^RecName: Full=Proteasome subunit beta type-3-B;^Eukaryota; Viridiplantae; Streptophyta; Embryophyta; Tracheophyta; Spermatophyta; Magnoliophyta; eudicotyledons; Gunneridae; Pentapetalae; rosids; malvids; Brassicales; Brassicaceae; Camelineae; Arabidopsis	.	.	.	.	.	.	.	ENOG410XSC8^The proteasome is a multicatalytic proteinase complex which is characterized by its ability to cleave peptides with Arg, Phe, Tyr, Leu, and Glu adjacent to the leaving group at neutral or slightly basic pH. The proteasome has an ATP-dependent proteolytic activity (By similarity)	KEGG:ath:AT1G77440`KO:K02735	GO:0005737^cellular_component^cytoplasm`GO:0005634^cellular_component^nucleus`GO:0000502^cellular_component^proteasome complex`GO:0019774^cellular_component^proteasome core complex, beta-subunit complex`GO:0004298^molecular_function^threonine-type endopeptidase activity`GO:0043161^biological_process^proteasome-mediated ubiquitin-dependent protein catabolic process	.	.	.
TRINITY_DN130210_c0_g1	TRINITY_DN130210_c0_g1_i1	.	.	.	.	.	.	.	.	.	.	.	.	.	.
TRINITY_DN130215_c0_g1	TRINITY_DN130215_c0_g1_i1	.	.	.	.	.	.	.	.	.	.	.	.	.	.
TRINITY_DN130243_c0_g1	TRINITY_DN130243_c0_g1_i1	.	.	.	.	.	.	.	.	.	.	.	.	.	.
TRINITY_DN130256_c0_g1	TRINITY_DN130256_c0_g1_i1	.	.	.	.	.	.	.	.	.	.	.	.	.	.
TRINITY_DN130237_c0_g1	TRINITY_DN130237_c0_g1_i1	.	.	.	.	.	.	.	.	.	.	.	.	.	.
TRINITY_DN130247_c0_g1	TRINITY_DN130247_c0_g1_i1	.	.	.	.	.	.	.	.	.	.	.	.	.	.
TRINITY_DN130239_c0_g1	TRINITY_DN130239_c0_g1_i1	ULP2A_ARATH^ULP2A_ARATH^Q:213-299,H:471-499^72.414%ID^E:2.8e-08^RecName: Full=Probable ubiquitin-like-specific protease 2A;^Eukaryota; Viridiplantae; Streptophyta; Embryophyta; Tracheophyta; Spermatophyta; Magnoliophyta; eudicotyledons; Gunneridae; Pentapetalae; rosids; malvids; Brassicales; Brassicaceae; Camelineae; Arabidopsis	.	.	.	.	.	.	.	COG5160^SUMO1 sentrin specific peptidase	KEGG:ath:AT4G33620`KO:K08596	GO:0016929^molecular_function^SUMO-specific protease activity`GO:0016926^biological_process^protein desumoylation	.	.	.
TRINITY_DN130241_c0_g1	TRINITY_DN130241_c0_g1_i1	.	.	.	.	.	.	.	.	.	.	.	.	.	.
TRINITY_DN130223_c0_g1	TRINITY_DN130223_c0_g1_i1	MED23_ARATH^MED23_ARATH^Q:190-303,H:774-812^76.923%ID^E:6.99e-11^RecName: Full=Mediator of RNA polymerase II transcription subunit 23;^Eukaryota; Viridiplantae; Streptophyta; Embryophyta; Tracheophyta; Spermatophyta; Magnoliophyta; eudicotyledons; Gunneridae; Pentapetalae; rosids; malvids; Brassicales; Brassicaceae; Camelineae; Arabidopsis	.	.	.	.	.	.	.	ENOG410ZH5R^Mediator complex subunit 23	KEGG:ath:AT1G23230`KO:K15166	GO:0016592^cellular_component^mediator complex`GO:0006355^biological_process^regulation of transcription, DNA-templated`GO:0006351^biological_process^transcription, DNA-templated	.	.	.
TRINITY_DN130213_c0_g1	TRINITY_DN130213_c0_g1_i1	.	.	.	.	.	.	.	.	.	.	.	.	.	.
TRINITY_DN130282_c0_g1	TRINITY_DN130282_c0_g1_i1	.	.	.	.	.	.	.	.	.	.	.	.	.	.
TRINITY_DN130230_c0_g1	TRINITY_DN130230_c0_g1_i1	.	.	.	.	.	.	.	.	.	.	.	.	.	.
TRINITY_DN130233_c0_g1	TRINITY_DN130233_c0_g1_i1	.	.	.	.	.	.	.	.	.	.	.	.	.	.
TRINITY_DN130259_c0_g1	TRINITY_DN130259_c0_g1_i1	BRXL3_ARATH^BRXL3_ARATH^Q:1-93,H:142-172^93.548%ID^E:1.18e-12^RecName: Full=Protein Brevis radix-like 3;^Eukaryota; Viridiplantae; Streptophyta; Embryophyta; Tracheophyta; Spermatophyta; Magnoliophyta; eudicotyledons; Gunneridae; Pentapetalae; rosids; malvids; Brassicales; Brassicaceae; Camelineae; Arabidopsis	.	.	.	.	.	.	.	ENOG4112D19^protein Brevis radix-like	KEGG:ath:AT1G54180	GO:0005634^cellular_component^nucleus	.	.	.
TRINITY_DN130225_c0_g1	TRINITY_DN130225_c0_g1_i1	.	.	.	.	.	.	.	.	.	.	.	.	.	.
TRINITY_DN130218_c0_g1	TRINITY_DN130218_c0_g1_i1	.	.	.	.	.	.	.	.	.	.	.	.	.	.
TRINITY_DN130234_c0_g1	TRINITY_DN130234_c0_g1_i1	.	.	.	.	.	.	.	.	.	.	.	.	.	.
TRINITY_DN130285_c0_g1	TRINITY_DN130285_c0_g1_i1	.	.	.	.	.	.	.	.	.	.	.	.	.	.
TRINITY_DN130219_c0_g1	TRINITY_DN130219_c0_g1_i1	.	.	TRINITY_DN130219_c0_g1_i1|m.171	450-37[-]	.	.	.	.	.	.	.	.	.	.
TRINITY_DN130221_c0_g1	TRINITY_DN130221_c0_g1_i1	SOQ1_ARATH^SOQ1_ARATH^Q:219-329,H:814-850^64.865%ID^E:2.6e-07^RecName: Full=Protein SUPPRESSOR OF QUENCHING 1, chloroplastic {ECO:0000303|PubMed:23818601};^Eukaryota; Viridiplantae; Streptophyta; Embryophyta; Tracheophyta; Spermatophyta; Magnoliophyta; eudicotyledons; Gunneridae; Pentapetalae; rosids; malvids; Brassicales; Brassicaceae; Camelineae; Arabidopsis	.	.	.	.	.	.	.	COG0637^HAD-superfamily hydrolase subfamily IA variant 3	KEGG:ath:AT1G56500	GO:0009507^cellular_component^chloroplast`GO:0009570^cellular_component^chloroplast stroma`GO:0009534^cellular_component^chloroplast thylakoid`GO:0009535^cellular_component^chloroplast thylakoid membrane`GO:0016021^cellular_component^integral component of membrane`GO:0042651^cellular_component^thylakoid membrane`GO:0016787^molecular_function^hydrolase activity`GO:0046872^molecular_function^metal …	.	.	.
TRINITY_DN130269_c0_g1	TRINITY_DN130269_c0_g1_i1	OS9_ARATH^OS9_ARATH^Q:3-98,H:218-249^68.75%ID^E:6.71e-06^RecName: Full=Protein OS-9 homolog {ECO:0000305};^Eukaryota; Viridiplantae; Streptophyta; Embryophyta; Tracheophyta; Spermatophyta; Magnoliophyta; eudicotyledons; Gunneridae; Pentapetalae; rosids; malvids; Brassicales; Brassicaceae; Camelineae; Arabidopsis	.	.	.	.	.	.	.	ENOG410XR8A^glycoprotein binding	KEGG:ath:AT5G35080`KO:K10088	GO:0005783^cellular_component^endoplasmic reticulum`GO:0005788^cellular_component^endoplasmic reticulum lumen`GO:0030246^molecular_function^carbohydrate binding`GO:0009651^biological_process^response to salt stress`GO:0030970^biological_process^retrograde protein transport, ER to cytosol`GO:0030433^biological_process^ubiquitin-dependent ERAD pathway	.	.	.
TRINITY_DN130278_c0_g1	TRINITY_DN130278_c0_g1_i1	.	.	.	.	.	.	.	.	.	.	.	.	.	.
TRINITY_DN130275_c0_g1	TRINITY_DN130275_c0_g1_i1	FH1_ARATH^FH1_ARATH^Q:294-563,H:545-637^65.591%ID^E:2.13e-30^RecName: Full=Formin-like protein 1;^Eukaryota; Viridiplantae; Streptophyta; Embryophyta; Tracheophyta; Spermatophyta; Magnoliophyta; eudicotyledons; Gunneridae; Pentapetalae; rosids; malvids; Brassicales; Brassicaceae; Camelineae; Arabidopsis	.	TRINITY_DN130275_c0_g1_i1|m.172	3-575[+]	FH1_ARATH^FH1_ARATH^Q:98-186,H:545-636^66.304%ID^E:8.89e-30^RecName: Full=Formin-like protein 1;^Eukaryota; Viridiplantae; Streptophyta; Embryophyta; Tracheophyta; Spermatophyta; Magnoliophyta; eudicotyledons; Gunneridae; Pentapetalae; rosids; malvids; Brassicales; Brassicaceae; Camelineae; Arabidopsis	PF02181.22^FH2^Formin Homology 2 Domain^141-188^E:2e-11	.	.	ENOG410XQWC^Formin 2	KEGG:ath:AT3G25500	GO:0005618^cellular_component^cell wall`GO:0016021^cellular_component^integral component of membrane`GO:0016020^cellular_component^membrane`GO:0005886^cellular_component^plasma membrane`GO:0003779^molecular_function^actin binding`GO:0051015^molecular_function^actin filament binding`GO:0030036^biological_process^actin cytoskeleton organization`GO:0045010^biological_process^actin nucleation`GO:0051…	.	.	.
TRINITY_DN130266_c0_g1	TRINITY_DN130266_c0_g1_i1	.	.	.	.	.	.	.	.	.	.	.	.	.	.
TRINITY_DN130284_c0_g1	TRINITY_DN130284_c0_g1_i1	ADH7_YEAST^ADH7_YEAST^Q:1-201,H:294-359^43.284%ID^E:3.02e-11^RecName: Full=NADP-dependent alcohol dehydrogenase 7;^Eukaryota; Fungi; Dikarya; Ascomycota; Saccharomycotina; Saccharomycetes; Saccharomycetales; Saccharomycetaceae; Saccharomyces	.	TRINITY_DN130284_c0_g1_i1|m.173	324-1[-]	.	.	.	.	.	.	.	.	.	.
TRINITY_DN130236_c0_g1	TRINITY_DN130236_c0_g1_i1	.	.	.	.	.	.	.	.	.	.	.	.	.	.
TRINITY_DN130201_c0_g1	TRINITY_DN130201_c0_g1_i1	.	.	.	.	.	.	.	.	.	.	.	.	.	.
TRINITY_DN130298_c0_g1	TRINITY_DN130298_c0_g1_i1	.	.	.	.	.	.	.	.	.	.	.	.	.	.
TRINITY_DN130202_c0_g1	TRINITY_DN130202_c0_g1_i1	.	.	.	.	.	.	.	.	.	.	.	.	.	.
TRINITY_DN101697_c0_g1	TRINITY_DN101697_c0_g1_i1	.	.	.	.	.	.	.	.	.	.	.	.	.	.
TRINITY_DN101651_c0_g1	TRINITY_DN101651_c0_g1_i1	FRL3_ARATH^FRL3_ARATH^Q:1-225,H:470-549^39.759%ID^E:3.74e-06^RecName: Full=FRIGIDA-like protein 3;^Eukaryota; Viridiplantae; Streptophyta; Embryophyta; Tracheophyta; Spermatophyta; Magnoliophyta; eudicotyledons; Gunneridae; Pentapetalae; rosids; malvids; Brassicales; Brassicaceae; Camelineae; Arabidopsis	.	.	.	.	.	.	.	ENOG4110RQD^Frigida-like	KEGG:ath:AT5G48385	GO:0030154^biological_process^cell differentiation`GO:0009908^biological_process^flower development	.	.	.
TRINITY_DN101615_c0_g1	TRINITY_DN101615_c0_g1_i1	.	.	.	.	.	.	.	.	.	.	.	.	.	.
TRINITY_DN101672_c0_g1	TRINITY_DN101672_c0_g1_i1	COPT5_ARATH^COPT5_ARATH^Q:381-166,H:74-146^63.014%ID^E:2.59e-20^RecName: Full=Copper transporter 5;^Eukaryota; Viridiplantae; Streptophyta; Embryophyta; Tracheophyta; Spermatophyta; Magnoliophyta; eudicotyledons; Gunneridae; Pentapetalae; rosids; malvids; Brassicales; Brassicaceae; Camelineae; Arabidopsis	.	.	.	.	.	.	.	ENOG4111I8D^Solute carrier family 31 copper transporters member	KEGG:ath:AT5G20650`KO:K14686	GO:0005794^cellular_component^Golgi apparatus`GO:0016021^cellular_component^integral component of membrane`GO:0005770^cellular_component^late endosome`GO:0009506^cellular_component^plasmodesma`GO:0005774^cellular_component^vacuolar membrane`GO:0005773^cellular_component^vacuole`GO:0005375^molecular_function^copper ion transmembrane transporter activity`GO:0015680^biological_process^intracellular …	.	.	.
TRINITY_DN101672_c0_g2	TRINITY_DN101672_c0_g2_i1	COPT5_ARATH^COPT5_ARATH^Q:324-166,H:93-146^66.667%ID^E:7.54e-15^RecName: Full=Copper transporter 5;^Eukaryota; Viridiplantae; Streptophyta; Embryophyta; Tracheophyta; Spermatophyta; Magnoliophyta; eudicotyledons; Gunneridae; Pentapetalae; rosids; malvids; Brassicales; Brassicaceae; Camelineae; Arabidopsis	.	.	.	.	.	.	.	ENOG4111I8D^Solute carrier family 31 copper transporters member	KEGG:ath:AT5G20650`KO:K14686	GO:0005794^cellular_component^Golgi apparatus`GO:0016021^cellular_component^integral component of membrane`GO:0005770^cellular_component^late endosome`GO:0009506^cellular_component^plasmodesma`GO:0005774^cellular_component^vacuolar membrane`GO:0005773^cellular_component^vacuole`GO:0005375^molecular_function^copper ion transmembrane transporter activity`GO:0015680^biological_process^intracellular …	.	.	.
TRINITY_DN101644_c0_g1	TRINITY_DN101644_c0_g1_i1	.	.	.	.	.	.	.	.	.	.	.	.	.	.
TRINITY_DN101648_c0_g1	TRINITY_DN101648_c0_g1_i1	.	.	.	.	.	.	.	.	.	.	.	.	.	.
TRINITY_DN101696_c0_g1	TRINITY_DN101696_c0_g1_i1	.	.	.	.	.	.	.	.	.	.	.	.	.	.
TRINITY_DN101602_c0_g1	TRINITY_DN101602_c0_g1_i1	.	.	.	.	.	.	.	.	.	.	.	.	.	.
TRINITY_DN101606_c0_g1	TRINITY_DN101606_c0_g1_i1	.	.	.	.	.	.	.	.	.	.	.	.	.	.
TRINITY_DN101692_c0_g1	TRINITY_DN101692_c0_g1_i1	.	.	TRINITY_DN101692_c0_g1_i1|m.174	393-1[-]	.	.	.	.	.	.	.	.	.	.
TRINITY_DN101655_c0_g1	TRINITY_DN101655_c0_g1_i1	.	.	.	.	.	.	.	.	.	.	.	.	.	.
TRINITY_DN101653_c0_g1	TRINITY_DN101653_c0_g1_i1	.	.	.	.	.	.	.	.	.	.	.	.	.	.
TRINITY_DN101614_c0_g1	TRINITY_DN101614_c0_g1_i1	.	.	.	.	.	.	.	.	.	.	.	.	.	.
TRINITY_DN101691_c0_g1	TRINITY_DN101691_c0_g1_i1	.	.	.	.	.	.	.	.	.	.	.	.	.	.
TRINITY_DN101605_c0_g1	TRINITY_DN101605_c0_g1_i1	.	.	.	.	.	.	.	.	.	.	.	.	.	.
TRINITY_DN101658_c0_g1	TRINITY_DN101658_c0_g1_i1	DEGP1_ARATH^DEGP1_ARATH^Q:3-68,H:161-182^95.455%ID^E:1.91e-06^RecName: Full=Protease Do-like 1, chloroplastic;^Eukaryota; Viridiplantae; Streptophyta; Embryophyta; Tracheophyta; Spermatophyta; Magnoliophyta; eudicotyledons; Gunneridae; Pentapetalae; rosids; malvids; Brassicales; Brassicaceae; Camelineae; Arabidopsis`DEGP1_ARATH^DEGP1_ARATH^Q:477-548,H:182-205^91.667%ID^E:2.42e-06^RecName: Full=Pr…	.	.	.	.	.	.	.	COG0265^Serine protease	KEGG:ath:AT3G27925	GO:0009507^cellular_component^chloroplast`GO:0009534^cellular_component^chloroplast thylakoid`GO:0009535^cellular_component^chloroplast thylakoid membrane`GO:0005634^cellular_component^nucleus`GO:0009579^cellular_component^thylakoid`GO:0031977^cellular_component^thylakoid lumen`GO:0042802^molecular_function^identical protein binding`GO:0004252^molecular_function^serine-type endopeptidase activity…	.	.	.
TRINITY_DN101686_c0_g1	TRINITY_DN101686_c0_g1_i1	.	.	.	.	.	.	.	.	.	.	.	.	.	.
TRINITY_DN101666_c0_g1	TRINITY_DN101666_c0_g1_i1	.	.	.	.	.	.	.	.	.	.	.	.	.	.
TRINITY_DN101662_c0_g1	TRINITY_DN101662_c0_g1_i1	.	.	.	.	.	.	.	.	.	.	.	.	.	.
TRINITY_DN101695_c0_g1	TRINITY_DN101695_c0_g1_i1	TIC32_ARATH^TIC32_ARATH^Q:286-390,H:107-141^68.571%ID^E:3.53e-09^RecName: Full=Short-chain dehydrogenase TIC 32, chloroplastic;^Eukaryota; Viridiplantae; Streptophyta; Embryophyta; Tracheophyta; Spermatophyta; Magnoliophyta; eudicotyledons; Gunneridae; Pentapetalae; rosids; malvids; Brassicales; Brassicaceae; Camelineae; Arabidopsis`TIC32_ARATH^TIC32_ARATH^Q:2-172,H:87-143^45.614%ID^E:4.99e-06^Re…	.	.	.	.	.	.	.	COG1028^Dehydrogenase reductase	KEGG:ath:AT4G23430	GO:0009507^cellular_component^chloroplast`GO:0009941^cellular_component^chloroplast envelope`GO:0009706^cellular_component^chloroplast inner membrane`GO:0005886^cellular_component^plasma membrane`GO:0016491^molecular_function^oxidoreductase activity`GO:0015031^biological_process^protein transport	.	.	.
TRINITY_DN101685_c0_g1	TRINITY_DN101685_c0_g1_i1	CHIN_RAT^CHIN_RAT^Q:2-346,H:187-303^45.299%ID^E:8.22e-27^RecName: Full=N-chimaerin;^Eukaryota; Metazoa; Chordata; Craniata; Vertebrata; Euteleostomi; Mammalia; Eutheria; Euarchontoglires; Glires; Rodentia; Myomorpha; Muroidea; Muridae; Murinae; Rattus	.	TRINITY_DN101685_c0_g1_i1|m.175	2-370[+]	CHIN_RAT^CHIN_RAT^Q:1-115,H:187-303^45.299%ID^E:7.4e-27^RecName: Full=N-chimaerin;^Eukaryota; Metazoa; Chordata; Craniata; Vertebrata; Euteleostomi; Mammalia; Eutheria; Euarchontoglires; Glires; Rodentia; Myomorpha; Muroidea; Muridae; Murinae; Rattus	PF00620.26^RhoGAP^RhoGAP domain^1-117^E:2.9e-35	.	.	ENOG410YM3I^rho GTPase activating protein	KEGG:rno:84030`KO:K20630	GO:0005737^cellular_component^cytoplasm`GO:0005096^molecular_function^GTPase activator activity`GO:0046872^molecular_function^metal ion binding`GO:0001565^molecular_function^phorbol ester receptor activity`GO:0048013^biological_process^ephrin receptor signaling pathway`GO:0035556^biological_process^intracellular signal transduction`GO:0008045^biological_process^motor neuron axon guidance`GO:00507…	GO:0007165^biological_process^signal transduction	.	.
TRINITY_DN101685_c0_g1	TRINITY_DN101685_c0_g1_i1	CHIN_RAT^CHIN_RAT^Q:2-346,H:187-303^45.299%ID^E:8.22e-27^RecName: Full=N-chimaerin;^Eukaryota; Metazoa; Chordata; Craniata; Vertebrata; Euteleostomi; Mammalia; Eutheria; Euarchontoglires; Glires; Rodentia; Myomorpha; Muroidea; Muridae; Murinae; Rattus	.	TRINITY_DN101685_c0_g1_i1|m.176	370-2[-]	.	.	.	.	.	.	.	.	.	.
TRINITY_DN101641_c0_g1	TRINITY_DN101641_c0_g1_i1	.	.	TRINITY_DN101641_c0_g1_i1|m.177	3-401[+]	.	.	.	.	.	.	.	.	.	.
TRINITY_DN101608_c0_g1	TRINITY_DN101608_c0_g1_i1	RNHX1_ARATH^RNHX1_ARATH^Q:407-60,H:449-564^38.793%ID^E:7.51e-16^RecName: Full=Putative ribonuclease H protein At1g65750;^Eukaryota; Viridiplantae; Streptophyta; Embryophyta; Tracheophyta; Spermatophyta; Magnoliophyta; eudicotyledons; Gunneridae; Pentapetalae; rosids; malvids; Brassicales; Brassicaceae; Camelineae; Arabidopsis	.	.	.	.	.	.	.	.	.	GO:0046872^molecular_function^metal ion binding`GO:0003676^molecular_function^nucleic acid binding`GO:0004523^molecular_function^RNA-DNA hybrid ribonuclease activity	.	.	.
TRINITY_DN101694_c0_g1	TRINITY_DN101694_c0_g1_i1	.	.	.	.	.	.	.	.	.	.	.	.	.	.
TRINITY_DN101700_c0_g1	TRINITY_DN101700_c0_g1_i1	.	.	.	.	.	.	.	.	.	.	.	.	.	.
TRINITY_DN101635_c0_g1	TRINITY_DN101635_c0_g1_i1	.	.	.	.	.	.	.	.	.	.	.	.	.	.
TRINITY_DN101634_c0_g1	TRINITY_DN101634_c0_g1_i1	.	.	.	.	.	.	.	.	.	.	.	.	.	.
TRINITY_DN101645_c0_g1	TRINITY_DN101645_c0_g1_i1	FPP6_ARATH^FPP6_ARATH^Q:9-389,H:230-356^76.378%ID^E:1.03e-58^RecName: Full=Filament-like plant protein 6;^Eukaryota; Viridiplantae; Streptophyta; Embryophyta; Tracheophyta; Spermatophyta; Magnoliophyta; eudicotyledons; Gunneridae; Pentapetalae; rosids; malvids; Brassicales; Brassicaceae; Camelineae; Arabidopsis	.	TRINITY_DN101645_c0_g1_i1|m.178	388-2[-]	.	.	.	.	.	.	.	.	.	.
TRINITY_DN101645_c0_g1	TRINITY_DN101645_c0_g1_i1	FPP6_ARATH^FPP6_ARATH^Q:9-389,H:230-356^76.378%ID^E:1.03e-58^RecName: Full=Filament-like plant protein 6;^Eukaryota; Viridiplantae; Streptophyta; Embryophyta; Tracheophyta; Spermatophyta; Magnoliophyta; eudicotyledons; Gunneridae; Pentapetalae; rosids; malvids; Brassicales; Brassicaceae; Camelineae; Arabidopsis	.	TRINITY_DN101645_c0_g1_i1|m.179	3-389[+]	FPP6_ARATH^FPP6_ARATH^Q:3-129,H:230-356^76.378%ID^E:9.26e-59^RecName: Full=Filament-like plant protein 6;^Eukaryota; Viridiplantae; Streptophyta; Embryophyta; Tracheophyta; Spermatophyta; Magnoliophyta; eudicotyledons; Gunneridae; Pentapetalae; rosids; malvids; Brassicales; Brassicaceae; Camelineae; Arabidopsis	PF05911.10^FPP^Filament-like plant protein, long coiled-coil^2-129^E:5.9e-70	.	.	ENOG41105E6^Plant protein of unknown function (DUF869)	KEGG:ath:AT1G47900	GO:0005886^cellular_component^plasma membrane	.	.	.
TRINITY_DN101659_c0_g1	TRINITY_DN101659_c0_g1_i1	FAFL_ARATH^FAFL_ARATH^Q:329-634,H:19-119^40.196%ID^E:3.55e-09^RecName: Full=Protein FAF-like, chloroplastic;^Eukaryota; Viridiplantae; Streptophyta; Embryophyta; Tracheophyta; Spermatophyta; Magnoliophyta; eudicotyledons; Gunneridae; Pentapetalae; rosids; malvids; Brassicales; Brassicaceae; Camelineae; Arabidopsis	.	TRINITY_DN101659_c0_g1_i1|m.180	260-646[+]	FAFL_ARATH^FAFL_ARATH^Q:24-125,H:19-119^43.269%ID^E:6.46e-13^RecName: Full=Protein FAF-like, chloroplastic;^Eukaryota; Viridiplantae; Streptophyta; Embryophyta; Tracheophyta; Spermatophyta; Magnoliophyta; eudicotyledons; Gunneridae; Pentapetalae; rosids; malvids; Brassicales; Brassicaceae; Camelineae; Arabidopsis	.	.	.	ENOG410YQ65^expressed protein	KEGG:ath:AT5G22090	GO:0009507^cellular_component^chloroplast	.	.	.
TRINITY_DN101680_c0_g1	TRINITY_DN101680_c0_g1_i1	.	.	.	.	.	.	.	.	.	.	.	.	.	.
TRINITY_DN101618_c0_g1	TRINITY_DN101618_c0_g1_i1	TLP10_ARATH^TLP10_ARATH^Q:485-366,H:406-445^100%ID^E:2.25e-19^RecName: Full=Tubby-like F-box protein 10;^Eukaryota; Viridiplantae; Streptophyta; Embryophyta; Tracheophyta; Spermatophyta; Magnoliophyta; eudicotyledons; Gunneridae; Pentapetalae; rosids; malvids; Brassicales; Brassicaceae; Camelineae; Arabidopsis	.	.	.	.	.	.	.	ENOG410XQFT^tubby like protein	KEGG:ath:AT1G25280	GO:0005829^cellular_component^cytosol`GO:0005634^cellular_component^nucleus`GO:0005886^cellular_component^plasma membrane`GO:0009536^cellular_component^plastid`GO:0035091^molecular_function^phosphatidylinositol binding`GO:0003700^molecular_function^DNA binding transcription factor activity`GO:0016567^biological_process^protein ubiquitination`GO:0006355^biological_process^regulation of transcripti…	.	.	.
TRINITY_DN101679_c0_g1	TRINITY_DN101679_c0_g1_i1	.	.	.	.	.	.	.	.	.	.	.	.	.	.
TRINITY_DN101699_c0_g1	TRINITY_DN101699_c0_g1_i1	.	.	.	.	.	.	.	.	.	.	.	.	.	.
TRINITY_DN101650_c0_g1	TRINITY_DN101650_c0_g1_i1	GACP3_ARATH^GACP3_ARATH^Q:1-453,H:679-818^66.887%ID^E:2.38e-59^RecName: Full=Gamma-tubulin complex component 3;^Eukaryota; Viridiplantae; Streptophyta; Embryophyta; Tracheophyta; Spermatophyta; Magnoliophyta; eudicotyledons; Gunneridae; Pentapetalae; rosids; malvids; Brassicales; Brassicaceae; Camelineae; Arabidopsis	.	TRINITY_DN101650_c0_g1_i1|m.181	1-453[+]	GACP3_ARATH^GACP3_ARATH^Q:1-151,H:679-818^66.887%ID^E:2.14e-59^RecName: Full=Gamma-tubulin complex component 3;^Eukaryota; Viridiplantae; Streptophyta; Embryophyta; Tracheophyta; Spermatophyta; Magnoliophyta; eudicotyledons; Gunneridae; Pentapetalae; rosids; malvids; Brassicales; Brassicaceae; Camelineae; Arabidopsis	.	.	.	ENOG410XQ5B^Tubulin, gamma complex associated protein	KEGG:ath:AT5G06680`KO:K16570	GO:0005938^cellular_component^cell cortex`GO:0055028^cellular_component^cortical microtubule`GO:0005737^cellular_component^cytoplasm`GO:0009898^cellular_component^cytoplasmic side of plasma membrane`GO:0000923^cellular_component^equatorial microtubule organizing center`GO:0000930^cellular_component^gamma-tubulin complex`GO:0008275^cellular_component^gamma-tubulin small complex`GO:0005874^cellular…	.	.	.
TRINITY_DN101639_c0_g1	TRINITY_DN101639_c0_g1_i1	.	.	.	.	.	.	.	.	.	.	.	.	.	.
TRINITY_DN101652_c0_g1	TRINITY_DN101652_c0_g1_i1	.	.	.	.	.	.	.	.	.	.	.	.	.	.
TRINITY_DN101637_c0_g1	TRINITY_DN101637_c0_g1_i1	.	.	.	.	.	.	.	.	.	.	.	.	.	.
TRINITY_DN101609_c0_g1	TRINITY_DN101609_c0_g1_i1	.	.	TRINITY_DN101609_c0_g1_i1|m.182	2-346[+]	.	.	.	ExpAA=33.66^PredHel=1^Topology=o5-27i	.	.	.	.	.	.
TRINITY_DN101619_c0_g1	TRINITY_DN101619_c0_g1_i1	.	.	.	.	.	.	.	.	.	.	.	.	.	.
TRINITY_DN101677_c0_g1	TRINITY_DN101677_c0_g1_i1	.	.	.	.	.	.	.	.	.	.	.	.	.	.
TRINITY_DN101627_c0_g1	TRINITY_DN101627_c0_g1_i1	RDS1_SCHPO^RDS1_SCHPO^Q:3-359,H:76-194^58.824%ID^E:1.15e-40^RecName: Full=Protein rds1;^Eukaryota; Fungi; Dikarya; Ascomycota; Taphrinomycotina; Schizosaccharomycetes; Schizosaccharomycetales; Schizosaccharomycetaceae; Schizosaccharomyces	.	TRINITY_DN101627_c0_g1_i1|m.183	1-363[+]	.	.	.	.	.	.	.	.	.	.
TRINITY_DN101627_c0_g1	TRINITY_DN101627_c0_g1_i1	RDS1_SCHPO^RDS1_SCHPO^Q:3-359,H:76-194^58.824%ID^E:1.15e-40^RecName: Full=Protein rds1;^Eukaryota; Fungi; Dikarya; Ascomycota; Taphrinomycotina; Schizosaccharomycetes; Schizosaccharomycetales; Schizosaccharomycetaceae; Schizosaccharomyces	.	TRINITY_DN101627_c0_g1_i1|m.184	362-3[-]	.	.	.	.	.	.	.	.	.	.
TRINITY_DN101627_c0_g1	TRINITY_DN101627_c0_g1_i1	RDS1_SCHPO^RDS1_SCHPO^Q:3-359,H:76-194^58.824%ID^E:1.15e-40^RecName: Full=Protein rds1;^Eukaryota; Fungi; Dikarya; Ascomycota; Taphrinomycotina; Schizosaccharomycetes; Schizosaccharomycetales; Schizosaccharomycetaceae; Schizosaccharomyces	.	TRINITY_DN101627_c0_g1_i1|m.185	3-362[+]	RDS1_SCHPO^RDS1_SCHPO^Q:1-119,H:76-194^58.824%ID^E:1.04e-40^RecName: Full=Protein rds1;^Eukaryota; Fungi; Dikarya; Ascomycota; Taphrinomycotina; Schizosaccharomycetes; Schizosaccharomycetales; Schizosaccharomycetaceae; Schizosaccharomyces	PF13668.5^Ferritin_2^Ferritin-like domain^7-114^E:6e-15	.	.	.	KEGG:spo:SPAC343.12	GO:0005783^cellular_component^endoplasmic reticulum	.	.	.
TRINITY_DN101623_c0_g1	TRINITY_DN101623_c0_g1_i1	Y1178_ARATH^Y1178_ARATH^Q:4-84,H:99-125^77.778%ID^E:8.98e-07^RecName: Full=BTB/POZ domain-containing protein At1g21780;^Eukaryota; Viridiplantae; Streptophyta; Embryophyta; Tracheophyta; Spermatophyta; Magnoliophyta; eudicotyledons; Gunneridae; Pentapetalae; rosids; malvids; Brassicales; Brassicaceae; Camelineae; Arabidopsis	.	.	.	.	.	.	.	ENOG410XQV8^meprin and TRAF homology domain-containing protein MATH domain-containing protein	KEGG:ath:AT1G21780`KO:K10523	GO:0031463^cellular_component^Cul3-RING ubiquitin ligase complex`GO:0005737^cellular_component^cytoplasm`GO:0019005^cellular_component^SCF ubiquitin ligase complex`GO:0031625^molecular_function^ubiquitin protein ligase binding`GO:0043161^biological_process^proteasome-mediated ubiquitin-dependent protein catabolic process`GO:0042787^biological_process^protein ubiquitination involved in ubiquitin-d…	.	.	.
TRINITY_DN101643_c0_g1	TRINITY_DN101643_c0_g1_i1	.	.	.	.	.	.	.	.	.	.	.	.	.	.
TRINITY_DN101673_c0_g3	TRINITY_DN101673_c0_g3_i1	CD48B_ARATH^CD48B_ARATH^Q:2-67,H:48-69^95.455%ID^E:2.73e-07^RecName: Full=Cell division control protein 48 homolog B;^Eukaryota; Viridiplantae; Streptophyta; Embryophyta; Tracheophyta; Spermatophyta; Magnoliophyta; eudicotyledons; Gunneridae; Pentapetalae; rosids; malvids; Brassicales; Brassicaceae; Camelineae; Arabidopsis	.	.	.	.	.	.	.	COG0464^Aaa atpase	KEGG:ath:AT2G03670	GO:0005856^cellular_component^cytoskeleton`GO:0005634^cellular_component^nucleus`GO:0009524^cellular_component^phragmoplast`GO:0005524^molecular_function^ATP binding`GO:0007049^biological_process^cell cycle`GO:0051301^biological_process^cell division`GO:0015031^biological_process^protein transport	.	.	.
TRINITY_DN101617_c1_g1	TRINITY_DN101617_c1_g1_i1	G6PI_OENSH^G6PI_OENSH^Q:1-87,H:157-185^79.31%ID^E:5e-08^RecName: Full=Glucose-6-phosphate isomerase, cytosolic;^Eukaryota; Viridiplantae; Streptophyta; Embryophyta; Tracheophyta; Spermatophyta; Magnoliophyta; eudicotyledons; Gunneridae; Pentapetalae; rosids; malvids; Myrtales; Onagraceae; Onagroideae; Onagreae; Oenothera	.	.	.	.	.	.	.	.	.	GO:0005737^cellular_component^cytoplasm`GO:0004347^molecular_function^glucose-6-phosphate isomerase activity`GO:0006094^biological_process^gluconeogenesis`GO:0006096^biological_process^glycolytic process	.	.	.
TRINITY_DN101617_c1_g2	TRINITY_DN101617_c1_g2_i1	.	.	.	.	.	.	.	.	.	.	.	.	.	.
TRINITY_DN101628_c0_g1	TRINITY_DN101628_c0_g1_i1	.	.	.	.	.	.	.	.	.	.	.	.	.	.
TRINITY_DN101675_c0_g1	TRINITY_DN101675_c0_g1_i1	.	.	.	.	.	.	.	.	.	.	.	.	.	.
TRINITY_DN101616_c0_g1	TRINITY_DN101616_c0_g1_i1	.	.	.	.	.	.	.	.	.	.	.	.	.	.
TRINITY_DN101698_c0_g1	TRINITY_DN101698_c0_g1_i1	.	.	.	.	.	.	.	.	.	.	.	.	.	.
TRINITY_DN101657_c0_g1	TRINITY_DN101657_c0_g1_i1	.	.	.	.	.	.	.	.	.	.	.	.	.	.
TRINITY_DN101665_c0_g1	TRINITY_DN101665_c0_g1_i1	.	.	.	.	.	.	.	.	.	.	.	.	.	.
TRINITY_DN101633_c0_g1	TRINITY_DN101633_c0_g1_i1	.	.	TRINITY_DN101633_c0_g1_i1|m.186	3-302[+]	.	.	.	.	.	.	.	.	.	.
TRINITY_DN101610_c0_g1	TRINITY_DN101610_c0_g1_i1	.	.	.	.	.	.	.	.	.	.	.	.	.	.
TRINITY_DN101688_c0_g1	TRINITY_DN101688_c0_g1_i1	FLU_ARATH^FLU_ARATH^Q:1-99,H:284-316^87.879%ID^E:9.88e-12^RecName: Full=Protein FLUORESCENT IN BLUE LIGHT, chloroplastic;^Eukaryota; Viridiplantae; Streptophyta; Embryophyta; Tracheophyta; Spermatophyta; Magnoliophyta; eudicotyledons; Gunneridae; Pentapetalae; rosids; malvids; Brassicales; Brassicaceae; Camelineae; Arabidopsis	.	.	.	.	.	.	.	ENOG4111KCW^protein FLUORESCENT IN BLUE LIGHT	KEGG:ath:AT3G14110	GO:0031969^cellular_component^chloroplast membrane`GO:0009535^cellular_component^chloroplast thylakoid membrane`GO:0016021^cellular_component^integral component of membrane	.	.	.
TRINITY_DN101638_c0_g1	TRINITY_DN101638_c0_g1_i1	.	.	TRINITY_DN101638_c0_g1_i1|m.187	804-496[-]	.	.	.	.	.	.	.	.	.	.
TRINITY_DN101613_c0_g1	TRINITY_DN101613_c0_g1_i1	P2C32_ARATH^P2C32_ARATH^Q:138-353,H:504-577^67.568%ID^E:5.27e-23^RecName: Full=Protein phosphatase 2C 32;^Eukaryota; Viridiplantae; Streptophyta; Embryophyta; Tracheophyta; Spermatophyta; Magnoliophyta; eudicotyledons; Gunneridae; Pentapetalae; rosids; malvids; Brassicales; Brassicaceae; Camelineae; Arabidopsis	.	.	.	.	.	.	.	COG0631^Phosphatase	KEGG:ath:AT2G46920	GO:0005634^cellular_component^nucleus`GO:0005886^cellular_component^plasma membrane`GO:0046872^molecular_function^metal ion binding`GO:0005543^molecular_function^phospholipid binding`GO:0004722^molecular_function^protein serine/threonine phosphatase activity`GO:0010074^biological_process^maintenance of meristem identity`GO:0007275^biological_process^multicellular organism development`GO:0006355^b…	.	.	.
TRINITY_DN101601_c0_g1	TRINITY_DN101601_c0_g1_i1	.	.	.	.	.	.	.	.	.	.	.	.	.	.
TRINITY_DN101632_c0_g1	TRINITY_DN101632_c0_g1_i1	.	.	.	.	.	.	.	.	.	.	.	.	.	.
TRINITY_DN101664_c0_g1	TRINITY_DN101664_c0_g1_i1	.	.	.	.	.	.	.	.	.	.	.	.	.	.
TRINITY_DN101683_c0_g1	TRINITY_DN101683_c0_g1_i1	.	.	.	.	.	.	.	.	.	.	.	.	.	.
TRINITY_DN101621_c0_g1	TRINITY_DN101621_c0_g1_i1	.	.	.	.	.	.	.	.	.	.	.	.	.	.
TRINITY_DN101667_c0_g1	TRINITY_DN101667_c0_g1_i1	.	.	.	.	.	.	.	.	.	.	.	.	.	.
TRINITY_DN101682_c0_g1	TRINITY_DN101682_c0_g1_i1	SRS2L_ARATH^SRS2L_ARATH^Q:337-411,H:746-770^84%ID^E:8.61e-06^RecName: Full=ATP-dependent DNA helicase SRS2-like protein At4g25120;^Eukaryota; Viridiplantae; Streptophyta; Embryophyta; Tracheophyta; Spermatophyta; Magnoliophyta; eudicotyledons; Gunneridae; Pentapetalae; rosids; malvids; Brassicales; Brassicaceae; Camelineae; Arabidopsis	.	.	.	.	.	.	.	COG0210^helicase	KEGG:ath:AT4G25120	GO:0005634^cellular_component^nucleus`GO:0043138^molecular_function^3'-5' DNA helicase activity`GO:0005524^molecular_function^ATP binding`GO:0004003^molecular_function^ATP-dependent DNA helicase activity`GO:0003677^molecular_function^DNA binding`GO:0003678^molecular_function^DNA helicase activity`GO:0006310^biological_process^DNA recombination`GO:0036292^biological_process^DNA rewinding	.	.	.
TRINITY_DN101671_c0_g1	TRINITY_DN101671_c0_g1_i1	.	.	.	.	.	.	.	.	.	.	.	.	.	.
TRINITY_DN113062_c0_g1	TRINITY_DN113062_c0_g1_i1	RR6_ARATH^RR6_ARATH^Q:1-90,H:100-129^90%ID^E:8.54e-11^RecName: Full=30S ribosomal protein S6 alpha, chloroplastic;^Eukaryota; Viridiplantae; Streptophyta; Embryophyta; Tracheophyta; Spermatophyta; Magnoliophyta; eudicotyledons; Gunneridae; Pentapetalae; rosids; malvids; Brassicales; Brassicaceae; Camelineae; Arabidopsis`RR6_ARATH^RR6_ARATH^Q:532-618,H:127-155^93.103%ID^E:6.33e-10^RecName: Full=30…	.	.	.	.	.	.	.	ENOG4111S82^ribosomal protein S6	KEGG:ath:AT1G64510`KO:K02990	GO:0009507^cellular_component^chloroplast`GO:0009535^cellular_component^chloroplast thylakoid membrane`GO:0005840^cellular_component^ribosome`GO:0009579^cellular_component^thylakoid`GO:0070181^molecular_function^small ribosomal subunit rRNA binding`GO:0003735^molecular_function^structural constituent of ribosome`GO:0006412^biological_process^translation	.	.	.
TRINITY_DN113071_c0_g1	TRINITY_DN113071_c0_g1_i1	AROA1_TOBAC^AROA1_TOBAC^Q:184-1563,H:60-518^84.199%ID^E:0^RecName: Full=3-phosphoshikimate 1-carboxyvinyltransferase 1, chloroplastic;^Eukaryota; Viridiplantae; Streptophyta; Embryophyta; Tracheophyta; Spermatophyta; Magnoliophyta; eudicotyledons; Gunneridae; Pentapetalae; asterids; lamiids; Solanales; Solanaceae; Nicotianoideae; Nicotianeae; Nicotiana	.	TRINITY_DN113071_c0_g1_i1|m.188	1-1566[+]	AROA_ARATH^AROA_ARATH^Q:1-521,H:7-520^74.573%ID^E:0^RecName: Full=3-phosphoshikimate 1-carboxyvinyltransferase, chloroplastic;^Eukaryota; Viridiplantae; Streptophyta; Embryophyta; Tracheophyta; Spermatophyta; Magnoliophyta; eudicotyledons; Gunneridae; Pentapetalae; rosids; malvids; Brassicales; Brassicaceae; Camelineae; Arabidopsis	PF00275.19^EPSP_synthase^EPSP synthase (3-phosphoshikimate 1-carboxyvinyltransferase)^87-515^E:4.7e-145	.	.	COG0128^5-enolpyruvylshikimate-3-phosphate synthase	KEGG:ath:AT2G45300`KO:K00800	GO:0009507^cellular_component^chloroplast`GO:0009570^cellular_component^chloroplast stroma`GO:0003866^molecular_function^3-phosphoshikimate 1-carboxyvinyltransferase activity`GO:0009073^biological_process^aromatic amino acid family biosynthetic process`GO:0009423^biological_process^chorismate biosynthetic process	GO:0016765^molecular_function^transferase activity, transferring alkyl or aryl (other than methyl) groups	.	.
TRINITY_DN113095_c0_g1	TRINITY_DN113095_c0_g1_i1	PMT7_ARATH^PMT7_ARATH^Q:1-1140,H:222-599^72.368%ID^E:0^RecName: Full=Probable methyltransferase PMT7;^Eukaryota; Viridiplantae; Streptophyta; Embryophyta; Tracheophyta; Spermatophyta; Magnoliophyta; eudicotyledons; Gunneridae; Pentapetalae; rosids; malvids; Brassicales; Brassicaceae; Camelineae; Arabidopsis	.	TRINITY_DN113095_c0_g1_i1|m.189	1-1152[+]	PMT7_ARATH^PMT7_ARATH^Q:1-381,H:222-600^72.178%ID^E:0^RecName: Full=Probable methyltransferase PMT7;^Eukaryota; Viridiplantae; Streptophyta; Embryophyta; Tracheophyta; Spermatophyta; Magnoliophyta; eudicotyledons; Gunneridae; Pentapetalae; rosids; malvids; Brassicales; Brassicaceae; Camelineae; Arabidopsis	PF03141.15^Methyltransf_29^Putative S-adenosyl-L-methionine-dependent methyltransferase^1-375^E:7.9e-156	.	.	ENOG410YC2G^methyltransferase	KEGG:ath:AT5G04060	GO:0005737^cellular_component^cytoplasm`GO:0005768^cellular_component^endosome`GO:0005794^cellular_component^Golgi apparatus`GO:0000139^cellular_component^Golgi membrane`GO:0016021^cellular_component^integral component of membrane`GO:0005802^cellular_component^trans-Golgi network`GO:0008757^molecular_function^S-adenosylmethionine-dependent methyltransferase activity`GO:0032259^biological_process^…	GO:0008168^molecular_function^methyltransferase activity	.	.
TRINITY_DN113098_c0_g1	TRINITY_DN113098_c0_g1_i1	NB5R1_ARATH^NB5R1_ARATH^Q:271-1110,H:1-281^81.495%ID^E:1.91e-157^RecName: Full=NADH--cytochrome b5 reductase 1;^Eukaryota; Viridiplantae; Streptophyta; Embryophyta; Tracheophyta; Spermatophyta; Magnoliophyta; eudicotyledons; Gunneridae; Pentapetalae; rosids; malvids; Brassicales; Brassicaceae; Camelineae; Arabidopsis	.	TRINITY_DN113098_c0_g1_i1|m.190	271-1113[+]	NB5R1_ARATH^NB5R1_ARATH^Q:1-280,H:1-281^81.495%ID^E:1.41e-161^RecName: Full=NADH--cytochrome b5 reductase 1;^Eukaryota; Viridiplantae; Streptophyta; Embryophyta; Tracheophyta; Spermatophyta; Magnoliophyta; eudicotyledons; Gunneridae; Pentapetalae; rosids; malvids; Brassicales; Brassicaceae; Camelineae; Arabidopsis	PF00970.23^FAD_binding_6^Oxidoreductase FAD-binding domain^49-147^E:1e-31`PF00175.20^NAD_binding_1^Oxidoreductase NAD-binding domain^157-263^E:8.7e-31	.	ExpAA=30.34^PredHel=1^Topology=i13-32o	COG0543^cytochrome-b5 reductase activity, acting on NAD(P)H	KEGG:ath:AT5G17770`KO:K00326	GO:0005783^cellular_component^endoplasmic reticulum`GO:0016021^cellular_component^integral component of membrane`GO:0005741^cellular_component^mitochondrial outer membrane`GO:0009505^cellular_component^plant-type cell wall`GO:0005886^cellular_component^plasma membrane`GO:0004128^molecular_function^cytochrome-b5 reductase activity, acting on NAD(P)H`GO:0022900^biological_process^electron transport…	GO:0016491^molecular_function^oxidoreductase activity`GO:0055114^biological_process^oxidation-reduction process	.	.
TRINITY_DN113098_c0_g1	TRINITY_DN113098_c0_g1_i1	NB5R1_ARATH^NB5R1_ARATH^Q:271-1110,H:1-281^81.495%ID^E:1.91e-157^RecName: Full=NADH--cytochrome b5 reductase 1;^Eukaryota; Viridiplantae; Streptophyta; Embryophyta; Tracheophyta; Spermatophyta; Magnoliophyta; eudicotyledons; Gunneridae; Pentapetalae; rosids; malvids; Brassicales; Brassicaceae; Camelineae; Arabidopsis	.	TRINITY_DN113098_c0_g1_i1|m.191	825-487[-]	.	.	.	.	.	.	.	.	.	.
TRINITY_DN113061_c0_g1	TRINITY_DN113061_c0_g1_i1	SODF2_ARATH^SODF2_ARATH^Q:3-221,H:198-270^73.973%ID^E:4.01e-33^RecName: Full=Superoxide dismutase [Fe] 2, chloroplastic;^Eukaryota; Viridiplantae; Streptophyta; Embryophyta; Tracheophyta; Spermatophyta; Magnoliophyta; eudicotyledons; Gunneridae; Pentapetalae; rosids; malvids; Brassicales; Brassicaceae; Camelineae; Arabidopsis	.	TRINITY_DN113061_c0_g1_i1|m.192	3-341[+]	SODF2_ARATH^SODF2_ARATH^Q:1-87,H:198-284^67.816%ID^E:2.27e-37^RecName: Full=Superoxide dismutase [Fe] 2, chloroplastic;^Eukaryota; Viridiplantae; Streptophyta; Embryophyta; Tracheophyta; Spermatophyta; Magnoliophyta; eudicotyledons; Gunneridae; Pentapetalae; rosids; malvids; Brassicales; Brassicaceae; Camelineae; Arabidopsis	PF02777.17^Sod_Fe_C^Iron/manganese superoxide dismutases, C-terminal domain^4-65^E:1e-20	.	.	COG0605^Destroys radicals which are normally produced within the cells and which are toxic to biological systems (By similarity)	KEGG:ath:AT5G51100`KO:K04564	GO:0009507^cellular_component^chloroplast`GO:0042644^cellular_component^chloroplast nucleoid`GO:0009534^cellular_component^chloroplast thylakoid`GO:0009295^cellular_component^nucleoid`GO:0009579^cellular_component^thylakoid`GO:0046872^molecular_function^metal ion binding`GO:0004784^molecular_function^superoxide dismutase activity`GO:0055114^biological_process^oxidation-reduction process`GO:000941…	GO:0004784^molecular_function^superoxide dismutase activity`GO:0046872^molecular_function^metal ion binding`GO:0006801^biological_process^superoxide metabolic process`GO:0055114^biological_process^oxidation-reduction process	.	.
TRINITY_DN113068_c0_g1	TRINITY_DN113068_c0_g1_i1	KCS4_ARATH^KCS4_ARATH^Q:1-258,H:257-342^73.256%ID^E:1.41e-38^RecName: Full=3-ketoacyl-CoA synthase 4 {ECO:0000303|PubMed:18465198};^Eukaryota; Viridiplantae; Streptophyta; Embryophyta; Tracheophyta; Spermatophyta; Magnoliophyta; eudicotyledons; Gunneridae; Pentapetalae; rosids; malvids; Brassicales; Brassicaceae; Camelineae; Arabidopsis`KCS4_ARATH^KCS4_ARATH^Q:242-334,H:338-368^67.742%ID^E:1.41e-…	.	.	.	.	.	.	.	ENOG410Y5VH^3-ketoacyl-coa synthase	KEGG:ath:AT1G19440`KO:K15397	GO:0016021^cellular_component^integral component of membrane`GO:0102336^molecular_function^3-oxo-arachidoyl-CoA synthase activity`GO:0102337^molecular_function^3-oxo-cerotoyl-CoA synthase activity`GO:0102338^molecular_function^3-oxo-lignoceronyl-CoA synthase activity`GO:0102756^molecular_function^very-long-chain 3-ketoacyl-CoA synthase activity`GO:0006633^biological_process^fatty acid biosyntheti…	.	.	.
TRINITY_DN113058_c0_g1	TRINITY_DN113058_c0_g1_i1	.	.	.	.	.	.	.	.	.	.	.	.	.	.
TRINITY_DN113048_c0_g1	TRINITY_DN113048_c0_g1_i1	BZP44_ARATH^BZP44_ARATH^Q:741-1136,H:25-152^49.254%ID^E:2.55e-19^RecName: Full=bZIP transcription factor 44 {ECO:0000305};^Eukaryota; Viridiplantae; Streptophyta; Embryophyta; Tracheophyta; Spermatophyta; Magnoliophyta; eudicotyledons; Gunneridae; Pentapetalae; rosids; malvids; Brassicales; Brassicaceae; Camelineae; Arabidopsis	.	TRINITY_DN113048_c0_g1_i1|m.193	693-1172[+]	BZP44_ARATH^BZP44_ARATH^Q:2-148,H:9-152^48%ID^E:3.96e-34^RecName: Full=bZIP transcription factor 44 {ECO:0000305};^Eukaryota; Viridiplantae; Streptophyta; Embryophyta; Tracheophyta; Spermatophyta; Magnoliophyta; eudicotyledons; Gunneridae; Pentapetalae; rosids; malvids; Brassicales; Brassicaceae; Camelineae; Arabidopsis	PF00170.20^bZIP_1^bZIP transcription factor^30-89^E:2e-10`PF07716.14^bZIP_2^Basic region leucine zipper^30-71^E:1.2e-05	.	.	ENOG410ZM7Q^Ocs element-binding factor	KEGG:ath:AT1G75390	GO:0005634^cellular_component^nucleus`GO:0046982^molecular_function^protein heterodimerization activity`GO:0043565^molecular_function^sequence-specific DNA binding`GO:0003700^molecular_function^DNA binding transcription factor activity`GO:0044212^molecular_function^transcription regulatory region DNA binding`GO:0009845^biological_process^seed germination`GO:0006351^biological_process^transcriptio…	GO:0003700^molecular_function^DNA binding transcription factor activity`GO:0006355^biological_process^regulation of transcription, DNA-templated	.	.
TRINITY_DN113013_c0_g1	TRINITY_DN113013_c0_g1_i1	.	.	.	.	.	.	.	.	.	.	.	.	.	.
TRINITY_DN113007_c2_g1	TRINITY_DN113007_c2_g1_i1	SUT13_ARATH^SUT13_ARATH^Q:308-2281,H:1-655^77.273%ID^E:0^RecName: Full=Sulfate transporter 1.3;^Eukaryota; Viridiplantae; Streptophyta; Embryophyta; Tracheophyta; Spermatophyta; Magnoliophyta; eudicotyledons; Gunneridae; Pentapetalae; rosids; malvids; Brassicales; Brassicaceae; Camelineae; Arabidopsis	.	TRINITY_DN113007_c2_g1_i1|m.194	308-2293[+]	SUT13_ARATH^SUT13_ARATH^Q:1-658,H:1-655^77.273%ID^E:0^RecName: Full=Sulfate transporter 1.3;^Eukaryota; Viridiplantae; Streptophyta; Embryophyta; Tracheophyta; Spermatophyta; Magnoliophyta; eudicotyledons; Gunneridae; Pentapetalae; rosids; malvids; Brassicales; Brassicaceae; Camelineae; Arabidopsis	PF00916.19^Sulfate_transp^Sulfate permease family^96-476^E:1.8e-135`PF01740.20^STAS^STAS domain^529-647^E:1.1e-32	.	ExpAA=210.82^PredHel=10^Topology=i148-165o180-202i209-228o257-279i286-308o344-366i379-401o414-436i443-465o478-500i	COG0659^sulfate transporter	KEGG:ath:AT1G22150`KO:K17470	GO:0005887^cellular_component^integral component of plasma membrane`GO:0008271^molecular_function^secondary active sulfate transmembrane transporter activity`GO:0015116^molecular_function^sulfate transmembrane transporter activity`GO:0015293^molecular_function^symporter activity	GO:0015116^molecular_function^sulfate transmembrane transporter activity`GO:0008272^biological_process^sulfate transport`GO:0016021^cellular_component^integral component of membrane	.	.
TRINITY_DN113007_c2_g1	TRINITY_DN113007_c2_g1_i1	SUT13_ARATH^SUT13_ARATH^Q:308-2281,H:1-655^77.273%ID^E:0^RecName: Full=Sulfate transporter 1.3;^Eukaryota; Viridiplantae; Streptophyta; Embryophyta; Tracheophyta; Spermatophyta; Magnoliophyta; eudicotyledons; Gunneridae; Pentapetalae; rosids; malvids; Brassicales; Brassicaceae; Camelineae; Arabidopsis	.	TRINITY_DN113007_c2_g1_i1|m.195	1884-1528[-]	.	.	sigP:1^27^0.472^YES	.	.	.	.	.	.	.
TRINITY_DN113023_c0_g1	TRINITY_DN113023_c0_g1_i1	BAME1_ARATH^BAME1_ARATH^Q:37-447,H:651-787^93.431%ID^E:1.8e-83^RecName: Full=Leucine-rich repeat receptor-like serine/threonine-protein kinase BAM1;^Eukaryota; Viridiplantae; Streptophyta; Embryophyta; Tracheophyta; Spermatophyta; Magnoliophyta; eudicotyledons; Gunneridae; Pentapetalae; rosids; malvids; Brassicales; Brassicaceae; Camelineae; Arabidopsis	.	TRINITY_DN113023_c0_g1_i1|m.196	1-459[+]	BAME1_ARATH^BAME1_ARATH^Q:1-149,H:639-787^92.617%ID^E:1.13e-83^RecName: Full=Leucine-rich repeat receptor-like serine/threonine-protein kinase BAM1;^Eukaryota; Viridiplantae; Streptophyta; Embryophyta; Tracheophyta; Spermatophyta; Magnoliophyta; eudicotyledons; Gunneridae; Pentapetalae; rosids; malvids; Brassicales; Brassicaceae; Camelineae; Arabidopsis	PF07714.16^Pkinase_Tyr^Protein tyrosine kinase^57-146^E:8e-15`PF00069.24^Pkinase^Protein kinase domain^58-145^E:1e-16	sigP:1^20^0.574^YES	ExpAA=20.16^PredHel=1^Topology=o4-23i	COG0515^Serine Threonine protein kinase`COG4886^leucine Rich Repeat	KEGG:ath:AT5G65700	GO:0016021^cellular_component^integral component of membrane`GO:0005886^cellular_component^plasma membrane`GO:0005524^molecular_function^ATP binding`GO:0043621^molecular_function^protein self-association`GO:0004674^molecular_function^protein serine/threonine kinase activity`GO:0033612^molecular_function^receptor serine/threonine kinase binding`GO:0030154^biological_process^cell differentiation`GO…	GO:0004672^molecular_function^protein kinase activity`GO:0006468^biological_process^protein phosphorylation`GO:0005524^molecular_function^ATP binding	.	.
TRINITY_DN113015_c0_g1	TRINITY_DN113015_c0_g1_i1	HFB2B_ARATH^HFB2B_ARATH^Q:3-371,H:251-364^36.719%ID^E:3.05e-11^RecName: Full=Heat stress transcription factor B-2b;^Eukaryota; Viridiplantae; Streptophyta; Embryophyta; Tracheophyta; Spermatophyta; Magnoliophyta; eudicotyledons; Gunneridae; Pentapetalae; rosids; malvids; Brassicales; Brassicaceae; Camelineae; Arabidopsis	.	TRINITY_DN113015_c0_g1_i1|m.197	3-395[+]	HFB2B_ARATH^HFB2B_ARATH^Q:1-122,H:251-363^37.008%ID^E:5.51e-13^RecName: Full=Heat stress transcription factor B-2b;^Eukaryota; Viridiplantae; Streptophyta; Embryophyta; Tracheophyta; Spermatophyta; Magnoliophyta; eudicotyledons; Gunneridae; Pentapetalae; rosids; malvids; Brassicales; Brassicaceae; Camelineae; Arabidopsis	.	.	.	COG5169^Transcription factor	KEGG:ath:AT4G11660`KO:K09419	GO:0005634^cellular_component^nucleus`GO:0043565^molecular_function^sequence-specific DNA binding`GO:0003700^molecular_function^DNA binding transcription factor activity`GO:0045892^biological_process^negative regulation of transcription, DNA-templated`GO:0010200^biological_process^response to chitin`GO:0006351^biological_process^transcription, DNA-templated	.	.	.
TRINITY_DN113015_c1_g1	TRINITY_DN113015_c1_g1_i1	.	.	TRINITY_DN113015_c1_g1_i1|m.198	2-325[+]	.	PF07816.10^DUF1645^Protein of unknown function (DUF1645)^4-102^E:1.8e-15	.	.	.	.	.	.	.	.
TRINITY_DN113049_c0_g1	TRINITY_DN113049_c0_g1_i1	UVB31_ARATH^UVB31_ARATH^Q:132-311,H:91-151^75.41%ID^E:5.47e-24^RecName: Full=UV-B-induced protein At3g17800, chloroplastic {ECO:0000305};^Eukaryota; Viridiplantae; Streptophyta; Embryophyta; Tracheophyta; Spermatophyta; Magnoliophyta; eudicotyledons; Gunneridae; Pentapetalae; rosids; malvids; Brassicales; Brassicaceae; Camelineae; Arabidopsis	.	TRINITY_DN113049_c0_g1_i1|m.199	3-311[+]	UVB31_ARATH^UVB31_ARATH^Q:44-103,H:91-151^75.41%ID^E:1.29e-24^RecName: Full=UV-B-induced protein At3g17800, chloroplastic {ECO:0000305};^Eukaryota; Viridiplantae; Streptophyta; Embryophyta; Tracheophyta; Spermatophyta; Magnoliophyta; eudicotyledons; Gunneridae; Pentapetalae; rosids; malvids; Brassicales; Brassicaceae; Camelineae; Arabidopsis	.	.	.	ENOG410YDXB^Protein of unknown function (DUF760)	KEGG:ath:AT3G17800	GO:0009507^cellular_component^chloroplast`GO:0010193^biological_process^response to ozone`GO:0010224^biological_process^response to UV-B`GO:0009611^biological_process^response to wounding	.	.	.
TRINITY_DN113049_c0_g2	TRINITY_DN113049_c0_g2_i1	.	.	TRINITY_DN113049_c0_g2_i1|m.200	82-384[+]	.	.	.	.	.	.	.	.	.	.
TRINITY_DN113049_c0_g3	TRINITY_DN113049_c0_g3_i1	UVB31_ARATH^UVB31_ARATH^Q:343-522,H:91-151^75.41%ID^E:1.99e-22^RecName: Full=UV-B-induced protein At3g17800, chloroplastic {ECO:0000305};^Eukaryota; Viridiplantae; Streptophyta; Embryophyta; Tracheophyta; Spermatophyta; Magnoliophyta; eudicotyledons; Gunneridae; Pentapetalae; rosids; malvids; Brassicales; Brassicaceae; Camelineae; Arabidopsis	.	TRINITY_DN113049_c0_g3_i1|m.201	82-522[+]	UVB31_ARATH^UVB31_ARATH^Q:88-147,H:91-151^75.41%ID^E:2.47e-23^RecName: Full=UV-B-induced protein At3g17800, chloroplastic {ECO:0000305};^Eukaryota; Viridiplantae; Streptophyta; Embryophyta; Tracheophyta; Spermatophyta; Magnoliophyta; eudicotyledons; Gunneridae; Pentapetalae; rosids; malvids; Brassicales; Brassicaceae; Camelineae; Arabidopsis	.	.	.	ENOG410YDXB^Protein of unknown function (DUF760)	KEGG:ath:AT3G17800	GO:0009507^cellular_component^chloroplast`GO:0010193^biological_process^response to ozone`GO:0010224^biological_process^response to UV-B`GO:0009611^biological_process^response to wounding	.	.	.
TRINITY_DN113031_c0_g1	TRINITY_DN113031_c0_g1_i1	SAMC1_ARATH^SAMC1_ARATH^Q:1593-1703,H:232-268^67.568%ID^E:1.01e-07^RecName: Full=S-adenosylmethionine carrier 1, chloroplastic/mitochondrial;^Eukaryota; Viridiplantae; Streptophyta; Embryophyta; Tracheophyta; Spermatophyta; Magnoliophyta; eudicotyledons; Gunneridae; Pentapetalae; rosids; malvids; Brassicales; Brassicaceae; Camelineae; Arabidopsis	.	.	.	.	.	.	.	ENOG4110BII^mitochondrial carrier protein	KEGG:ath:AT4G39460`KO:K15111	GO:0009507^cellular_component^chloroplast`GO:0009941^cellular_component^chloroplast envelope`GO:0031969^cellular_component^chloroplast membrane`GO:0016021^cellular_component^integral component of membrane`GO:0005743^cellular_component^mitochondrial inner membrane`GO:0005739^cellular_component^mitochondrion`GO:0009536^cellular_component^plastid`GO:0000095^molecular_function^S-adenosyl-L-methionine…	.	.	.
TRINITY_DN113099_c0_g1	TRINITY_DN113099_c0_g1_i1	CUL4_ARATH^CUL4_ARATH^Q:179-2560,H:24-792^81.486%ID^E:0^RecName: Full=Cullin-4;^Eukaryota; Viridiplantae; Streptophyta; Embryophyta; Tracheophyta; Spermatophyta; Magnoliophyta; eudicotyledons; Gunneridae; Pentapetalae; rosids; malvids; Brassicales; Brassicaceae; Camelineae; Arabidopsis	.	TRINITY_DN113099_c0_g1_i1|m.202	83-2563[+]	CUL4_ARATH^CUL4_ARATH^Q:1-826,H:1-792^79.782%ID^E:0^RecName: Full=Cullin-4;^Eukaryota; Viridiplantae; Streptophyta; Embryophyta; Tracheophyta; Spermatophyta; Magnoliophyta; eudicotyledons; Gunneridae; Pentapetalae; rosids; malvids; Brassicales; Brassicaceae; Camelineae; Arabidopsis	PF00888.21^Cullin^Cullin family^130-727^E:1.9e-209`PF10557.8^Cullin_Nedd8^Cullin protein neddylation domain^758-818^E:3.4e-23	.	.	COG5647^cullin 1	KEGG:ath:AT5G46210`KO:K10609	GO:0080008^cellular_component^Cul4-RING E3 ubiquitin ligase complex`GO:0005829^cellular_component^cytosol`GO:0005634^cellular_component^nucleus`GO:0000151^cellular_component^ubiquitin ligase complex`GO:0031625^molecular_function^ubiquitin protein ligase binding`GO:0009738^biological_process^abscisic acid-activated signaling pathway`GO:0048825^biological_process^cotyledon development`GO:0006281^bi…	GO:0031625^molecular_function^ubiquitin protein ligase binding`GO:0006511^biological_process^ubiquitin-dependent protein catabolic process	.	.
TRINITY_DN113099_c0_g1	TRINITY_DN113099_c0_g1_i1	CUL4_ARATH^CUL4_ARATH^Q:179-2560,H:24-792^81.486%ID^E:0^RecName: Full=Cullin-4;^Eukaryota; Viridiplantae; Streptophyta; Embryophyta; Tracheophyta; Spermatophyta; Magnoliophyta; eudicotyledons; Gunneridae; Pentapetalae; rosids; malvids; Brassicales; Brassicaceae; Camelineae; Arabidopsis	.	TRINITY_DN113099_c0_g1_i1|m.203	1449-1111[-]	.	.	.	.	.	.	.	.	.	.
TRINITY_DN113001_c0_g1	TRINITY_DN113001_c0_g1_i1	RD21A_ARATH^RD21A_ARATH^Q:398-1705,H:23-450^67.273%ID^E:0^RecName: Full=Cysteine proteinase RD21A {ECO:0000305};^Eukaryota; Viridiplantae; Streptophyta; Embryophyta; Tracheophyta; Spermatophyta; Magnoliophyta; eudicotyledons; Gunneridae; Pentapetalae; rosids; malvids; Brassicales; Brassicaceae; Camelineae; Arabidopsis	.	TRINITY_DN113001_c0_g1_i1|m.204	329-1756[+]	RD21A_ARATH^RD21A_ARATH^Q:1-459,H:1-450^66.307%ID^E:0^RecName: Full=Cysteine proteinase RD21A {ECO:0000305};^Eukaryota; Viridiplantae; Streptophyta; Embryophyta; Tracheophyta; Spermatophyta; Magnoliophyta; eudicotyledons; Gunneridae; Pentapetalae; rosids; malvids; Brassicales; Brassicaceae; Camelineae; Arabidopsis	PF08246.11^Inhibitor_I29^Cathepsin propeptide inhibitor domain (I29)^50-106^E:3e-19`PF00112.22^Peptidase_C1^Papain family cysteine protease^139-355^E:1.3e-85`PF00396.17^Granulin^Granulin^395-441^E:4.4e-11	sigP:1^22^0.854^YES	ExpAA=18.20^PredHel=1^Topology=i7-28o	COG4870^cathepsin	KEGG:ath:AT1G47128	GO:0048046^cellular_component^apoplast`GO:0009507^cellular_component^chloroplast`GO:0010494^cellular_component^cytoplasmic stress granule`GO:0005615^cellular_component^extracellular space`GO:0005794^cellular_component^Golgi apparatus`GO:0005764^cellular_component^lysosome`GO:0000932^cellular_component^P-body`GO:0009506^cellular_component^plasmodesma`GO:0005773^cellular_component^vacuole`GO:000419…	GO:0008234^molecular_function^cysteine-type peptidase activity`GO:0006508^biological_process^proteolysis	.	.
TRINITY_DN113001_c0_g1	TRINITY_DN113001_c0_g1_i1	RD21A_ARATH^RD21A_ARATH^Q:398-1705,H:23-450^67.273%ID^E:0^RecName: Full=Cysteine proteinase RD21A {ECO:0000305};^Eukaryota; Viridiplantae; Streptophyta; Embryophyta; Tracheophyta; Spermatophyta; Magnoliophyta; eudicotyledons; Gunneridae; Pentapetalae; rosids; malvids; Brassicales; Brassicaceae; Camelineae; Arabidopsis	.	TRINITY_DN113001_c0_g1_i1|m.205	733-434[-]	.	.	.	.	.	.	.	.	.	.
TRINITY_DN113002_c0_g1	TRINITY_DN113002_c0_g1_i1	.	.	.	.	.	.	.	.	.	.	.	.	.	.
TRINITY_DN113030_c0_g1	TRINITY_DN113030_c0_g1_i1	PP438_ARATH^PP438_ARATH^Q:259-1605,H:62-510^66.075%ID^E:0^RecName: Full=Pentatricopeptide repeat-containing protein PNM1, mitochondrial;^Eukaryota; Viridiplantae; Streptophyta; Embryophyta; Tracheophyta; Spermatophyta; Magnoliophyta; eudicotyledons; Gunneridae; Pentapetalae; rosids; malvids; Brassicales; Brassicaceae; Camelineae; Arabidopsis	.	TRINITY_DN113030_c0_g1_i1|m.206	1-1638[+]	PP438_ARATH^PP438_ARATH^Q:72-544,H:40-519^65.768%ID^E:0^RecName: Full=Pentatricopeptide repeat-containing protein PNM1, mitochondrial;^Eukaryota; Viridiplantae; Streptophyta; Embryophyta; Tracheophyta; Spermatophyta; Magnoliophyta; eudicotyledons; Gunneridae; Pentapetalae; rosids; malvids; Brassicales; Brassicaceae; Camelineae; Arabidopsis	PF01535.19^PPR^PPR repeat^207-231^E:0.12`PF01535.19^PPR^PPR repeat^276-302^E:0.007`PF13812.5^PPR_3^Pentatricopeptide repeat domain^336-391^E:0.00054`PF12854.6^PPR_1^PPR repeat^343-375^E:2.5e-05`PF13041.5^PPR_2^PPR repeat family^348-394^E:3.3e-12`PF01535.19^PPR^PPR repeat^351-380^E:0.00011`PF01535.19^PPR^PPR repeat^386-414^E:0.34`PF01535.19^PPR^PPR repeat^429-452^E:1.2`PF13812.5^PPR_3^Pentatricope…	.	.	ENOG410Z7Z7^Pentatricopeptide repeat-containing protein	KEGG:ath:AT5G60960	GO:0005759^cellular_component^mitochondrial matrix`GO:0005739^cellular_component^mitochondrion`GO:0005634^cellular_component^nucleus`GO:0004519^molecular_function^endonuclease activity`GO:0003729^molecular_function^mRNA binding`GO:0003723^molecular_function^RNA binding`GO:0006355^biological_process^regulation of transcription, DNA-templated`GO:0006417^biological_process^regulation of translation`…	.	.	.
TRINITY_DN113030_c0_g1	TRINITY_DN113030_c0_g1_i1	PP438_ARATH^PP438_ARATH^Q:259-1605,H:62-510^66.075%ID^E:0^RecName: Full=Pentatricopeptide repeat-containing protein PNM1, mitochondrial;^Eukaryota; Viridiplantae; Streptophyta; Embryophyta; Tracheophyta; Spermatophyta; Magnoliophyta; eudicotyledons; Gunneridae; Pentapetalae; rosids; malvids; Brassicales; Brassicaceae; Camelineae; Arabidopsis	.	TRINITY_DN113030_c0_g1_i1|m.207	518-21[-]	.	.	.	ExpAA=14.47^PredHel=1^Topology=i139-156o	.	.	.	.	.	.
TRINITY_DN113030_c0_g1	TRINITY_DN113030_c0_g1_i1	PP438_ARATH^PP438_ARATH^Q:259-1605,H:62-510^66.075%ID^E:0^RecName: Full=Pentatricopeptide repeat-containing protein PNM1, mitochondrial;^Eukaryota; Viridiplantae; Streptophyta; Embryophyta; Tracheophyta; Spermatophyta; Magnoliophyta; eudicotyledons; Gunneridae; Pentapetalae; rosids; malvids; Brassicales; Brassicaceae; Camelineae; Arabidopsis	.	TRINITY_DN113030_c0_g1_i1|m.208	1317-829[-]	.	PF13516.5^LRR_6^Leucine Rich repeat^83-95^E:0.13	.	.	.	.	.	GO:0005515^molecular_function^protein binding	.	.
TRINITY_DN113053_c0_g1	TRINITY_DN113053_c0_g1_i1	LOFG2_ARATH^LOFG2_ARATH^Q:319-1086,H:109-370^60.076%ID^E:7.26e-101^RecName: Full=Probable E3 ubiquitin-protein ligase LOG2;^Eukaryota; Viridiplantae; Streptophyta; Embryophyta; Tracheophyta; Spermatophyta; Magnoliophyta; eudicotyledons; Gunneridae; Pentapetalae; rosids; malvids; Brassicales; Brassicaceae; Camelineae; Arabidopsis	.	TRINITY_DN113053_c0_g1_i1|m.209	121-1104[+]	LOFG2_ARATH^LOFG2_ARATH^Q:62-322,H:104-370^59.328%ID^E:8.45e-105^RecName: Full=Probable E3 ubiquitin-protein ligase LOG2;^Eukaryota; Viridiplantae; Streptophyta; Embryophyta; Tracheophyta; Spermatophyta; Magnoliophyta; eudicotyledons; Gunneridae; Pentapetalae; rosids; malvids; Brassicales; Brassicaceae; Camelineae; Arabidopsis	PF13920.5^zf-C3HC4_3^Zinc finger, C3HC4 type (RING finger)^269-315^E:3.3e-16`PF14447.5^Prok-RING_4^Prokaryotic RING finger family 4^271-313^E:1.8e-07	.	.	ENOG410XRAE^RING finger	KEGG:ath:AT3G09770	GO:0005886^cellular_component^plasma membrane`GO:0046872^molecular_function^metal ion binding`GO:0004842^molecular_function^ubiquitin-protein transferase activity`GO:1901527^biological_process^abscisic acid-activated signaling pathway involved in stomatal movement`GO:0080144^biological_process^amino acid homeostasis`GO:0009737^biological_process^response to abscisic acid	.	.	.
TRINITY_DN113050_c0_g1	TRINITY_DN113050_c0_g1_i1	PATL1_DANRE^PATL1_DANRE^Q:1091-2044,H:411-710^27.16%ID^E:1.01e-09^RecName: Full=Protein PAT1 homolog 1;^Eukaryota; Metazoa; Chordata; Craniata; Vertebrata; Euteleostomi; Actinopterygii; Neopterygii; Teleostei; Ostariophysi; Cypriniformes; Cyprinidae; Danio	.	TRINITY_DN113050_c0_g1_i1|m.210	2-2320[+]	PATL1_DANRE^PATL1_DANRE^Q:364-681,H:411-710^27.16%ID^E:1.06e-09^RecName: Full=Protein PAT1 homolog 1;^Eukaryota; Metazoa; Chordata; Craniata; Vertebrata; Euteleostomi; Actinopterygii; Neopterygii; Teleostei; Ostariophysi; Cypriniformes; Cyprinidae; Danio	.	.	.	ENOG4110Q9I^protein associated with topoisomerase II homolog 1 (yeast)	KEGG:dre:100009659`KO:K12617	GO:0016607^cellular_component^nuclear speck`GO:0000932^cellular_component^P-body`GO:0016605^cellular_component^PML body`GO:0003723^molecular_function^RNA binding`GO:0033962^biological_process^cytoplasmic mRNA processing body assembly`GO:0000290^biological_process^deadenylation-dependent decapping of nuclear-transcribed mRNA	.	.	.
TRINITY_DN113050_c0_g1	TRINITY_DN113050_c0_g1_i1	PATL1_DANRE^PATL1_DANRE^Q:1091-2044,H:411-710^27.16%ID^E:1.01e-09^RecName: Full=Protein PAT1 homolog 1;^Eukaryota; Metazoa; Chordata; Craniata; Vertebrata; Euteleostomi; Actinopterygii; Neopterygii; Teleostei; Ostariophysi; Cypriniformes; Cyprinidae; Danio	.	TRINITY_DN113050_c0_g1_i1|m.211	303-806[+]	.	.	.	ExpAA=42.12^PredHel=2^Topology=i99-121o125-147i	.	.	.	.	.	.
TRINITY_DN113047_c0_g1	TRINITY_DN113047_c0_g1_i3	CW15A_XENLA^CW15A_XENLA^Q:141-830,H:1-228^43.096%ID^E:3.43e-26^RecName: Full=Protein CWC15 homolog A;^Eukaryota; Metazoa; Chordata; Craniata; Vertebrata; Euteleostomi; Amphibia; Batrachia; Anura; Pipoidea; Pipidae; Xenopodinae; Xenopus; Xenopus	.	TRINITY_DN113047_c0_g1_i3|m.212	141-833[+]	CW15A_XENLA^CW15A_XENLA^Q:1-230,H:1-228^46.444%ID^E:9.16e-47^RecName: Full=Protein CWC15 homolog A;^Eukaryota; Metazoa; Chordata; Craniata; Vertebrata; Euteleostomi; Amphibia; Batrachia; Anura; Pipoidea; Pipidae; Xenopodinae; Xenopus; Xenopus	PF04889.11^Cwf_Cwc_15^Cwf15/Cwc15 cell cycle control protein^1-230^E:3.7e-76	.	.	.	KEGG:xla:414727`KO:K12863	GO:0005634^cellular_component^nucleus`GO:0005681^cellular_component^spliceosomal complex`GO:0003723^molecular_function^RNA binding`GO:0000398^biological_process^mRNA splicing, via spliceosome	GO:0000398^biological_process^mRNA splicing, via spliceosome`GO:0005681^cellular_component^spliceosomal complex	.	.
TRINITY_DN113047_c0_g1	TRINITY_DN113047_c0_g1_i3	CW15A_XENLA^CW15A_XENLA^Q:141-830,H:1-228^43.096%ID^E:3.43e-26^RecName: Full=Protein CWC15 homolog A;^Eukaryota; Metazoa; Chordata; Craniata; Vertebrata; Euteleostomi; Amphibia; Batrachia; Anura; Pipoidea; Pipidae; Xenopodinae; Xenopus; Xenopus	.	TRINITY_DN113047_c0_g1_i3|m.213	818-414[-]	.	.	.	ExpAA=45.77^PredHel=2^Topology=i56-78o93-115i	.	.	.	.	.	.
TRINITY_DN113047_c0_g1	TRINITY_DN113047_c0_g1_i3	CW15A_XENLA^CW15A_XENLA^Q:141-830,H:1-228^43.096%ID^E:3.43e-26^RecName: Full=Protein CWC15 homolog A;^Eukaryota; Metazoa; Chordata; Craniata; Vertebrata; Euteleostomi; Amphibia; Batrachia; Anura; Pipoidea; Pipidae; Xenopodinae; Xenopus; Xenopus	.	TRINITY_DN113047_c0_g1_i3|m.214	826-497[-]	.	.	.	.	.	.	.	.	.	.
TRINITY_DN113047_c1_g1	TRINITY_DN113047_c1_g1_i1	.	.	.	.	.	.	.	.	.	.	.	.	.	.
TRINITY_DN113042_c0_g2	TRINITY_DN113042_c0_g2_i1	.	.	.	.	.	.	.	.	.	.	.	.	.	.
TRINITY_DN113035_c0_g1	TRINITY_DN113035_c0_g1_i1	.	.	TRINITY_DN113035_c0_g1_i1|m.215	419-87[-]	.	.	.	.	.	.	.	.	.	.
TRINITY_DN113093_c0_g1	TRINITY_DN113093_c0_g1_i1	LPAT2_ARATH^LPAT2_ARATH^Q:39-407,H:2-124^78.862%ID^E:2.84e-50^RecName: Full=1-acyl-sn-glycerol-3-phosphate acyltransferase 2;^Eukaryota; Viridiplantae; Streptophyta; Embryophyta; Tracheophyta; Spermatophyta; Magnoliophyta; eudicotyledons; Gunneridae; Pentapetalae; rosids; malvids; Brassicales; Brassicaceae; Camelineae; Arabidopsis	.	TRINITY_DN113093_c0_g1_i1|m.216	3-407[+]	LPAT2_ARATH^LPAT2_ARATH^Q:13-135,H:2-124^78.862%ID^E:3.39e-64^RecName: Full=1-acyl-sn-glycerol-3-phosphate acyltransferase 2;^Eukaryota; Viridiplantae; Streptophyta; Embryophyta; Tracheophyta; Spermatophyta; Magnoliophyta; eudicotyledons; Gunneridae; Pentapetalae; rosids; malvids; Brassicales; Brassicaceae; Camelineae; Arabidopsis	PF01553.20^Acyltransferase^Acyltransferase^93-119^E:5e-05	.	ExpAA=39.84^PredHel=1^Topology=i13-35o	COG0204^Acyltransferase	KEGG:ath:AT3G57650`KO:K13523	GO:0005783^cellular_component^endoplasmic reticulum`GO:0005789^cellular_component^endoplasmic reticulum membrane`GO:0016021^cellular_component^integral component of membrane`GO:0003841^molecular_function^1-acylglycerol-3-phosphate O-acyltransferase activity`GO:0016024^biological_process^CDP-diacylglycerol biosynthetic process`GO:0007275^biological_process^multicellular organism development	GO:0016746^molecular_function^transferase activity, transferring acyl groups`GO:0008152^biological_process^metabolic process	.	.
TRINITY_DN113090_c0_g1	TRINITY_DN113090_c0_g1_i1	RD522_ARATH^RD522_ARATH^Q:632-1084,H:55-199^75.658%ID^E:2.07e-74^RecName: Full=DNA repair RAD52-like protein 2, chloroplastic {ECO:0000305};^Eukaryota; Viridiplantae; Streptophyta; Embryophyta; Tracheophyta; Spermatophyta; Magnoliophyta; eudicotyledons; Gunneridae; Pentapetalae; rosids; malvids; Brassicales; Brassicaceae; Camelineae; Arabidopsis	.	TRINITY_DN113090_c0_g1_i1|m.217	320-1090[+]	RD522_ARATH^RD522_ARATH^Q:105-255,H:55-199^78.289%ID^E:9.51e-81^RecName: Full=DNA repair RAD52-like protein 2, chloroplastic {ECO:0000305};^Eukaryota; Viridiplantae; Streptophyta; Embryophyta; Tracheophyta; Spermatophyta; Magnoliophyta; eudicotyledons; Gunneridae; Pentapetalae; rosids; malvids; Brassicales; Brassicaceae; Camelineae; Arabidopsis	.	.	.	ENOG410YI2T^NA	KEGG:ath:AT5G47870	GO:0009507^cellular_component^chloroplast`GO:0003677^molecular_function^DNA binding`GO:0000724^biological_process^double-strand break repair via homologous recombination	.	.	.
TRINITY_DN113090_c0_g1	TRINITY_DN113090_c0_g1_i1	RD522_ARATH^RD522_ARATH^Q:632-1084,H:55-199^75.658%ID^E:2.07e-74^RecName: Full=DNA repair RAD52-like protein 2, chloroplastic {ECO:0000305};^Eukaryota; Viridiplantae; Streptophyta; Embryophyta; Tracheophyta; Spermatophyta; Magnoliophyta; eudicotyledons; Gunneridae; Pentapetalae; rosids; malvids; Brassicales; Brassicaceae; Camelineae; Arabidopsis	.	TRINITY_DN113090_c0_g1_i1|m.218	3-308[+]	.	.	.	.	.	.	.	.	.	.
TRINITY_DN113034_c0_g1	TRINITY_DN113034_c0_g1_i1	INT1_ARATH^INT1_ARATH^Q:590-2062,H:2-495^81.01%ID^E:0^RecName: Full=Inositol transporter 1;^Eukaryota; Viridiplantae; Streptophyta; Embryophyta; Tracheophyta; Spermatophyta; Magnoliophyta; eudicotyledons; Gunneridae; Pentapetalae; rosids; malvids; Brassicales; Brassicaceae; Camelineae; Arabidopsis	.	TRINITY_DN113034_c0_g1_i1|m.219	557-2083[+]	INT1_ARATH^INT1_ARATH^Q:12-502,H:2-495^81.01%ID^E:0^RecName: Full=Inositol transporter 1;^Eukaryota; Viridiplantae; Streptophyta; Embryophyta; Tracheophyta; Spermatophyta; Magnoliophyta; eudicotyledons; Gunneridae; Pentapetalae; rosids; malvids; Brassicales; Brassicaceae; Camelineae; Arabidopsis	PF00083.23^Sugar_tr^Sugar (and other) transporter^45-488^E:5.1e-124`PF07690.15^MFS_1^Major Facilitator Superfamily^50-432^E:8.3e-31	.	ExpAA=258.58^PredHel=12^Topology=i40-62o82-104i113-132o137-159i171-193o198-220i286-308o323-345i352-374o384-406i419-441o451-473i	ENOG410XNQK^Transporter	KEGG:ath:AT2G43330`KO:K08150	GO:0005887^cellular_component^integral component of plasma membrane`GO:0009705^cellular_component^plant-type vacuole membrane`GO:0005773^cellular_component^vacuole`GO:0005366^molecular_function^myo-inositol:proton symporter activity`GO:0015798^biological_process^myo-inositol transport	GO:0022857^molecular_function^transmembrane transporter activity`GO:0055085^biological_process^transmembrane transport`GO:0016021^cellular_component^integral component of membrane	.	.
TRINITY_DN113074_c0_g1	TRINITY_DN113074_c0_g1_i1	TPRL3_ERYCB^TPRL3_ERYCB^Q:156-923,H:2-258^80.934%ID^E:5.75e-131^RecName: Full=Tropinone reductase-like 3;^Eukaryota; Viridiplantae; Streptophyta; Embryophyta; Tracheophyta; Spermatophyta; Magnoliophyta; eudicotyledons; Gunneridae; Pentapetalae; rosids; fabids; Malpighiales; Erythroxylaceae; Erythroxylum	.	TRINITY_DN113074_c0_g1_i1|m.220	171-926[+]	TPRL3_ERYCB^TPRL3_ERYCB^Q:1-251,H:8-258^80.876%ID^E:6.81e-153^RecName: Full=Tropinone reductase-like 3;^Eukaryota; Viridiplantae; Streptophyta; Embryophyta; Tracheophyta; Spermatophyta; Magnoliophyta; eudicotyledons; Gunneridae; Pentapetalae; rosids; fabids; Malpighiales; Erythroxylaceae; Erythroxylum	PF00106.24^adh_short^short chain dehydrogenase^9-199^E:2.6e-43`PF08659.9^KR^KR domain^12-178^E:1.3e-10`PF13561.5^adh_short_C2^Enoyl-(Acyl carrier protein) reductase^18-247^E:9.9e-61	.	.	.	.	GO:0016491^molecular_function^oxidoreductase activity	.	.	.
TRINITY_DN113094_c0_g1	TRINITY_DN113094_c0_g1_i1	Y3330_ARATH^Y3330_ARATH^Q:319-2340,H:56-724^63.609%ID^E:0^RecName: Full=Putative metallophosphoesterase At3g03305;^Eukaryota; Viridiplantae; Streptophyta; Embryophyta; Tracheophyta; Spermatophyta; Magnoliophyta; eudicotyledons; Gunneridae; Pentapetalae; rosids; malvids; Brassicales; Brassicaceae; Camelineae; Arabidopsis	.	TRINITY_DN113094_c0_g1_i1|m.221	1-2400[+]	Y3330_ARATH^Y3330_ARATH^Q:107-780,H:56-724^63.609%ID^E:0^RecName: Full=Putative metallophosphoesterase At3g03305;^Eukaryota; Viridiplantae; Streptophyta; Embryophyta; Tracheophyta; Spermatophyta; Magnoliophyta; eudicotyledons; Gunneridae; Pentapetalae; rosids; malvids; Brassicales; Brassicaceae; Camelineae; Arabidopsis	PF00149.27^Metallophos^Calcineurin-like phosphoesterase^111-328^E:7.5e-16	.	ExpAA=145.66^PredHel=7^Topology=o4-26i28-50o556-578i614-636o674-696i742-760o775-794i	ENOG410XNV4^transmembrane protein 62	KEGG:ath:AT3G03305	GO:0016021^cellular_component^integral component of membrane`GO:0016787^molecular_function^hydrolase activity`GO:0046872^molecular_function^metal ion binding	GO:0016787^molecular_function^hydrolase activity	.	.
TRINITY_DN113094_c0_g1	TRINITY_DN113094_c0_g1_i1	Y3330_ARATH^Y3330_ARATH^Q:319-2340,H:56-724^63.609%ID^E:0^RecName: Full=Putative metallophosphoesterase At3g03305;^Eukaryota; Viridiplantae; Streptophyta; Embryophyta; Tracheophyta; Spermatophyta; Magnoliophyta; eudicotyledons; Gunneridae; Pentapetalae; rosids; malvids; Brassicales; Brassicaceae; Camelineae; Arabidopsis	.	TRINITY_DN113094_c0_g1_i1|m.222	572-3[-]	.	.	.	.	.	.	.	.	.	.
TRINITY_DN113094_c0_g1	TRINITY_DN113094_c0_g1_i1	Y3330_ARATH^Y3330_ARATH^Q:319-2340,H:56-724^63.609%ID^E:0^RecName: Full=Putative metallophosphoesterase At3g03305;^Eukaryota; Viridiplantae; Streptophyta; Embryophyta; Tracheophyta; Spermatophyta; Magnoliophyta; eudicotyledons; Gunneridae; Pentapetalae; rosids; malvids; Brassicales; Brassicaceae; Camelineae; Arabidopsis	.	TRINITY_DN113094_c0_g1_i1|m.223	1121-1447[+]	.	.	sigP:1^35^0.518^YES	.	.	.	.	.	.	.
TRINITY_DN113018_c0_g1	TRINITY_DN113018_c0_g1_i1	MSBP1_ORYSJ^MSBP1_ORYSJ^Q:3-149,H:130-178^83.673%ID^E:1.49e-20^RecName: Full=Membrane steroid-binding protein 1 {ECO:0000303|PubMed:25711711};^Eukaryota; Viridiplantae; Streptophyta; Embryophyta; Tracheophyta; Spermatophyta; Magnoliophyta; Liliopsida; Poales; Poaceae; BOP clade; Oryzoideae; Oryzeae; Oryzinae; Oryza; Oryza sativa	.	TRINITY_DN113018_c0_g1_i1|m.224	3-350[+]	MSBP1_ORYSJ^MSBP1_ORYSJ^Q:1-49,H:130-178^83.673%ID^E:2.63e-22^RecName: Full=Membrane steroid-binding protein 1 {ECO:0000303|PubMed:25711711};^Eukaryota; Viridiplantae; Streptophyta; Embryophyta; Tracheophyta; Spermatophyta; Magnoliophyta; Liliopsida; Poales; Poaceae; BOP clade; Oryzoideae; Oryzeae; Oryzinae; Oryza; Oryza sativa	.	.	.	ENOG4111UG0^progesterone receptor membrane component	KEGG:osa:4349046`KO:K17278	GO:0012505^cellular_component^endomembrane system`GO:0016021^cellular_component^integral component of membrane`GO:0016020^cellular_component^membrane`GO:0005886^cellular_component^plasma membrane`GO:0020037^molecular_function^heme binding`GO:0005496^molecular_function^steroid binding	.	.	.
TRINITY_DN113025_c0_g1	TRINITY_DN113025_c0_g1_i1	RR10_MESCR^RR10_MESCR^Q:109-732,H:4-197^60.577%ID^E:4.31e-70^RecName: Full=30S ribosomal protein S10, chloroplastic;^Eukaryota; Viridiplantae; Streptophyta; Embryophyta; Tracheophyta; Spermatophyta; Magnoliophyta; eudicotyledons; Gunneridae; Pentapetalae; Caryophyllales; Aizoaceae; Mesembryanthemum; Cryophytum	.	TRINITY_DN113025_c0_g1_i1|m.225	97-735[+]	RR10_MESCR^RR10_MESCR^Q:5-212,H:4-197^62.5%ID^E:4.56e-79^RecName: Full=30S ribosomal protein S10, chloroplastic;^Eukaryota; Viridiplantae; Streptophyta; Embryophyta; Tracheophyta; Spermatophyta; Magnoliophyta; eudicotyledons; Gunneridae; Pentapetalae; Caryophyllales; Aizoaceae; Mesembryanthemum; Cryophytum	PF00338.21^Ribosomal_S10^Ribosomal protein S10p/S20e^117-211^E:2e-33`PF14228.5^MOR2-PAG1_mid^Cell morphogenesis central region^118-192^E:0.054	.	.	.	.	GO:0009507^cellular_component^chloroplast`GO:0005840^cellular_component^ribosome`GO:0003723^molecular_function^RNA binding`GO:0003735^molecular_function^structural constituent of ribosome`GO:0006412^biological_process^translation	.	.	.
TRINITY_DN113025_c0_g1	TRINITY_DN113025_c0_g1_i1	RR10_MESCR^RR10_MESCR^Q:109-732,H:4-197^60.577%ID^E:4.31e-70^RecName: Full=30S ribosomal protein S10, chloroplastic;^Eukaryota; Viridiplantae; Streptophyta; Embryophyta; Tracheophyta; Spermatophyta; Magnoliophyta; eudicotyledons; Gunneridae; Pentapetalae; Caryophyllales; Aizoaceae; Mesembryanthemum; Cryophytum	.	TRINITY_DN113025_c0_g1_i1|m.226	536-3[-]	.	.	.	ExpAA=25.37^PredHel=1^Topology=i27-46o	.	.	.	.	.	.
TRINITY_DN113064_c0_g1	TRINITY_DN113064_c0_g1_i1	YZ37_SYNY3^YZ37_SYNY3^Q:181-489,H:4-98^34.951%ID^E:9.68e-09^RecName: Full=Uncharacterized sugar kinase slr0537;^Bacteria; Cyanobacteria; Synechococcales; Merismopediaceae; Synechocystis	.	TRINITY_DN113064_c0_g1_i1|m.227	1-498[+]	YZ37_SYNY3^YZ37_SYNY3^Q:60-163,H:3-98^34.615%ID^E:3.8e-08^RecName: Full=Uncharacterized sugar kinase slr0537;^Bacteria; Cyanobacteria; Synechococcales; Merismopediaceae; Synechocystis	PF00294.23^PfkB^pfkB family carbohydrate kinase^113-165^E:4.9e-05	.	.	.	KEGG:syn:slr0537	GO:0016301^molecular_function^kinase activity`GO:0016773^molecular_function^phosphotransferase activity, alcohol group as acceptor	.	.	.
TRINITY_DN113064_c0_g1	TRINITY_DN113064_c0_g1_i1	YZ37_SYNY3^YZ37_SYNY3^Q:181-489,H:4-98^34.951%ID^E:9.68e-09^RecName: Full=Uncharacterized sugar kinase slr0537;^Bacteria; Cyanobacteria; Synechococcales; Merismopediaceae; Synechocystis	.	TRINITY_DN113064_c0_g1_i1|m.228	499-47[-]	.	.	sigP:1^16^0.523^YES	ExpAA=21.20^PredHel=1^Topology=i115-137o	.	.	.	.	.	.
TRINITY_DN113059_c0_g1	TRINITY_DN113059_c0_g1_i1	.	.	.	.	.	.	.	.	.	.	.	.	.	.
TRINITY_DN113017_c0_g1	TRINITY_DN113017_c0_g1_i1	UXS5_ARATH^UXS5_ARATH^Q:568-1587,H:1-340^92.353%ID^E:0^RecName: Full=UDP-glucuronic acid decarboxylase 5;^Eukaryota; Viridiplantae; Streptophyta; Embryophyta; Tracheophyta; Spermatophyta; Magnoliophyta; eudicotyledons; Gunneridae; Pentapetalae; rosids; malvids; Brassicales; Brassicaceae; Camelineae; Arabidopsis	.	TRINITY_DN113017_c0_g1_i1|m.229	556-1596[+]	UXS5_ARATH^UXS5_ARATH^Q:5-344,H:1-340^92.353%ID^E:0^RecName: Full=UDP-glucuronic acid decarboxylase 5;^Eukaryota; Viridiplantae; Streptophyta; Embryophyta; Tracheophyta; Spermatophyta; Magnoliophyta; eudicotyledons; Gunneridae; Pentapetalae; rosids; malvids; Brassicales; Brassicaceae; Camelineae; Arabidopsis	PF04321.16^RmlD_sub_bind^RmlD substrate binding domain^33-294^E:2e-07`PF01370.20^Epimerase^NAD dependent epimerase/dehydratase family^35-269^E:5e-47`PF02719.14^Polysacc_synt_2^Polysaccharide biosynthesis protein^35-147^E:5e-08`PF16363.4^GDP_Man_Dehyd^GDP-mannose 4,6 dehydratase^36-329^E:3.9e-54`PF01073.18^3Beta_HSD^3-beta hydroxysteroid dehydrogenase/isomerase family^36-187^E:3.4e-12`PF07993.11^N…	.	.	COG0451^Nad-dependent epimerase dehydratase	KEGG:ath:AT3G46440`KO:K08678	GO:0005829^cellular_component^cytosol`GO:0070403^molecular_function^NAD+ binding`GO:0048040^molecular_function^UDP-glucuronate decarboxylase activity`GO:0042732^biological_process^D-xylose metabolic process`GO:0033320^biological_process^UDP-D-xylose biosynthetic process	GO:0003824^molecular_function^catalytic activity`GO:0050662^molecular_function^coenzyme binding`GO:0003854^molecular_function^3-beta-hydroxy-delta5-steroid dehydrogenase activity`GO:0016616^molecular_function^oxidoreductase activity, acting on the CH-OH group of donors, NAD or NADP as acceptor`GO:0006694^biological_process^steroid biosynthetic process`GO:0055114^biological_process^oxidation-reduc…	.	.
TRINITY_DN113017_c0_g1	TRINITY_DN113017_c0_g1_i1	UXS5_ARATH^UXS5_ARATH^Q:568-1587,H:1-340^92.353%ID^E:0^RecName: Full=UDP-glucuronic acid decarboxylase 5;^Eukaryota; Viridiplantae; Streptophyta; Embryophyta; Tracheophyta; Spermatophyta; Magnoliophyta; eudicotyledons; Gunneridae; Pentapetalae; rosids; malvids; Brassicales; Brassicaceae; Camelineae; Arabidopsis	.	TRINITY_DN113017_c0_g1_i1|m.230	1724-1290[-]	.	.	.	.	.	.	.	.	.	.
TRINITY_DN113017_c0_g1	TRINITY_DN113017_c0_g1_i1	UXS5_ARATH^UXS5_ARATH^Q:568-1587,H:1-340^92.353%ID^E:0^RecName: Full=UDP-glucuronic acid decarboxylase 5;^Eukaryota; Viridiplantae; Streptophyta; Embryophyta; Tracheophyta; Spermatophyta; Magnoliophyta; eudicotyledons; Gunneridae; Pentapetalae; rosids; malvids; Brassicales; Brassicaceae; Camelineae; Arabidopsis	.	TRINITY_DN113017_c0_g1_i1|m.231	696-391[-]	.	.	.	.	.	.	.	.	.	.
TRINITY_DN113091_c0_g1	TRINITY_DN113091_c0_g1_i1	SIP11_MAIZE^SIP11_MAIZE^Q:386-994,H:19-223^51.456%ID^E:4.3e-54^RecName: Full=Aquaporin SIP1-1;^Eukaryota; Viridiplantae; Streptophyta; Embryophyta; Tracheophyta; Spermatophyta; Magnoliophyta; Liliopsida; Poales; Poaceae; PACMAD clade; Panicoideae; Andropogonodae; Andropogoneae; Tripsacinae; Zea	.	TRINITY_DN113091_c0_g1_i1|m.232	341-1054[+]	SIP11_MAIZE^SIP11_MAIZE^Q:16-229,H:19-234^50.691%ID^E:1.65e-62^RecName: Full=Aquaporin SIP1-1;^Eukaryota; Viridiplantae; Streptophyta; Embryophyta; Tracheophyta; Spermatophyta; Magnoliophyta; Liliopsida; Poales; Poaceae; PACMAD clade; Panicoideae; Andropogonodae; Andropogoneae; Tripsacinae; Zea	PF00230.19^MIP^Major intrinsic protein^4-223^E:9.1e-15	.	ExpAA=109.33^PredHel=5^Topology=o15-37i44-66o134-153i160-177o206-228i	COG0580^Channel that permits osmotically driven movement of water in both directions. It is involved in the osmoregulation and in the maintenance of cell turgor during volume expansion in rapidly growing cells. It mediates rapid entry or exit of water in response to abrupt changes in osmolarity (By similarity)	KEGG:zma:542494`KO:K09875	GO:0016021^cellular_component^integral component of membrane`GO:0005215^molecular_function^transporter activity	GO:0005215^molecular_function^transporter activity`GO:0006810^biological_process^transport`GO:0016020^cellular_component^membrane	.	.
TRINITY_DN113066_c0_g1	TRINITY_DN113066_c0_g1_i1	.	.	TRINITY_DN113066_c0_g1_i1|m.233	164-1630[+]	.	PF04339.11^FemAB_like^Peptidogalycan biosysnthesis/recognition^108-484^E:1.1e-150`PF13480.6^Acetyltransf_6^Acetyltransferase (GNAT) domain^296-431^E:6e-11	.	.	.	.	.	.	.	.
TRINITY_DN113087_c0_g1	TRINITY_DN113087_c0_g1_i1	GPT2_ARATH^GPT2_ARATH^Q:894-1916,H:53-388^83.09%ID^E:0^RecName: Full=Glucose-6-phosphate/phosphate translocator 2, chloroplastic;^Eukaryota; Viridiplantae; Streptophyta; Embryophyta; Tracheophyta; Spermatophyta; Magnoliophyta; eudicotyledons; Gunneridae; Pentapetalae; rosids; malvids; Brassicales; Brassicaceae; Camelineae; Arabidopsis	.	TRINITY_DN113087_c0_g1_i1|m.234	735-1919[+]	GPT2_ARATH^GPT2_ARATH^Q:54-394,H:53-388^83.09%ID^E:0^RecName: Full=Glucose-6-phosphate/phosphate translocator 2, chloroplastic;^Eukaryota; Viridiplantae; Streptophyta; Embryophyta; Tracheophyta; Spermatophyta; Magnoliophyta; eudicotyledons; Gunneridae; Pentapetalae; rosids; malvids; Brassicales; Brassicaceae; Camelineae; Arabidopsis	PF03151.15^TPT^Triose-phosphate Transporter family^102-390^E:1.2e-115`PF00892.19^EamA^EamA-like transporter family^105-235^E:2.8e-10	.	ExpAA=147.85^PredHel=6^Topology=i103-120o130-152i207-229o244-263i275-297o364-386i	ENOG410XP1S^solute carrier family 35 member	KEGG:ath:AT1G61800`KO:K15283	GO:0031969^cellular_component^chloroplast membrane`GO:0016021^cellular_component^integral component of membrane`GO:0005774^cellular_component^vacuolar membrane`GO:0015152^molecular_function^glucose-6-phosphate transmembrane transporter activity`GO:0005315^molecular_function^inorganic phosphate transmembrane transporter activity`GO:0015120^molecular_function^phosphoglycerate transmembrane transpor…	GO:0016020^cellular_component^membrane`GO:0016021^cellular_component^integral component of membrane	.	.
TRINITY_DN113087_c0_g1	TRINITY_DN113087_c0_g1_i1	GPT2_ARATH^GPT2_ARATH^Q:894-1916,H:53-388^83.09%ID^E:0^RecName: Full=Glucose-6-phosphate/phosphate translocator 2, chloroplastic;^Eukaryota; Viridiplantae; Streptophyta; Embryophyta; Tracheophyta; Spermatophyta; Magnoliophyta; eudicotyledons; Gunneridae; Pentapetalae; rosids; malvids; Brassicales; Brassicaceae; Camelineae; Arabidopsis	.	TRINITY_DN113087_c0_g1_i1|m.235	1271-930[-]	.	.	.	.	.	.	.	.	.	.
TRINITY_DN113088_c0_g6	TRINITY_DN113088_c0_g6_i1	PER4_VITVI^PER4_VITVI^Q:145-1098,H:5-321^74.214%ID^E:3.87e-175^RecName: Full=Peroxidase 4 {ECO:0000250|UniProtKB:Q42578};^Eukaryota; Viridiplantae; Streptophyta; Embryophyta; Tracheophyta; Spermatophyta; Magnoliophyta; eudicotyledons; Gunneridae; Pentapetalae; rosids; Vitales; Vitaceae; Vitis	.	TRINITY_DN113088_c0_g6_i1|m.236	121-1101[+]	PER4_VITVI^PER4_VITVI^Q:9-326,H:5-321^74.214%ID^E:5.62e-177^RecName: Full=Peroxidase 4 {ECO:0000250|UniProtKB:Q42578};^Eukaryota; Viridiplantae; Streptophyta; Embryophyta; Tracheophyta; Spermatophyta; Magnoliophyta; eudicotyledons; Gunneridae; Pentapetalae; rosids; Vitales; Vitaceae; Vitis	PF00141.22^peroxidase^Peroxidase^47-290^E:4.1e-81	sigP:1^29^0.872^YES	ExpAA=21.90^PredHel=1^Topology=i7-29o	ENOG410YETZ^peroxidase	KEGG:vvi:100257005`KO:K00430	GO:0005576^cellular_component^extracellular region`GO:0020037^molecular_function^heme binding`GO:0046872^molecular_function^metal ion binding`GO:0004601^molecular_function^peroxidase activity`GO:0042744^biological_process^hydrogen peroxide catabolic process`GO:0006979^biological_process^response to oxidative stress	GO:0004601^molecular_function^peroxidase activity`GO:0020037^molecular_function^heme binding`GO:0006979^biological_process^response to oxidative stress`GO:0055114^biological_process^oxidation-reduction process	.	.
TRINITY_DN113088_c0_g6	TRINITY_DN113088_c0_g6_i1	PER4_VITVI^PER4_VITVI^Q:145-1098,H:5-321^74.214%ID^E:3.87e-175^RecName: Full=Peroxidase 4 {ECO:0000250|UniProtKB:Q42578};^Eukaryota; Viridiplantae; Streptophyta; Embryophyta; Tracheophyta; Spermatophyta; Magnoliophyta; eudicotyledons; Gunneridae; Pentapetalae; rosids; Vitales; Vitaceae; Vitis	.	TRINITY_DN113088_c0_g6_i1|m.237	656-330[-]	.	.	.	.	.	.	.	.	.	.
TRINITY_DN113008_c0_g1	TRINITY_DN113008_c0_g1_i1	SURF6_DICDI^SURF6_DICDI^Q:972-1250,H:280-390^34.234%ID^E:5.91e-06^RecName: Full=Surfeit locus protein 6 homolog;^Eukaryota; Amoebozoa; Mycetozoa; Dictyosteliida; Dictyostelium	.	TRINITY_DN113008_c0_g1_i1|m.238	3-1265[+]	SURF6_DICDI^SURF6_DICDI^Q:324-416,H:280-390^34.234%ID^E:3.13e-06^RecName: Full=Surfeit locus protein 6 homolog;^Eukaryota; Amoebozoa; Mycetozoa; Dictyosteliida; Dictyostelium	PF15459.5^RRP14^60S ribosome biogenesis protein Rrp14^93-153^E:2.9e-20`PF04935.11^SURF6^Surfeit locus protein 6^213-394^E:7.3e-20	sigP:1^25^0.583^YES	.	.	KEGG:ddi:DDB_G0290425	GO:0022625^cellular_component^cytosolic large ribosomal subunit`GO:0005730^cellular_component^nucleolus`GO:0003677^molecular_function^DNA binding`GO:0003723^molecular_function^RNA binding`GO:0042273^biological_process^ribosomal large subunit biogenesis`GO:0042274^biological_process^ribosomal small subunit biogenesis	.	.	.
TRINITY_DN113014_c0_g1	TRINITY_DN113014_c0_g1_i1	SCL6_ARATH^SCL6_ARATH^Q:1267-2352,H:204-555^62.363%ID^E:2.82e-135^RecName: Full=Scarecrow-like protein 6;^Eukaryota; Viridiplantae; Streptophyta; Embryophyta; Tracheophyta; Spermatophyta; Magnoliophyta; eudicotyledons; Gunneridae; Pentapetalae; rosids; malvids; Brassicales; Brassicaceae; Camelineae; Arabidopsis	.	TRINITY_DN113014_c0_g1_i1|m.239	157-2355[+]	SCL6_ARATH^SCL6_ARATH^Q:371-732,H:204-555^62.363%ID^E:4.16e-147^RecName: Full=Scarecrow-like protein 6;^Eukaryota; Viridiplantae; Streptophyta; Embryophyta; Tracheophyta; Spermatophyta; Magnoliophyta; eudicotyledons; Gunneridae; Pentapetalae; rosids; malvids; Brassicales; Brassicaceae; Camelineae; Arabidopsis	PF03514.13^GRAS^GRAS domain family^375-730^E:3.3e-92	.	.	ENOG410YANM^Scarecrow-like protein	KEGG:ath:AT4G00150	GO:0005634^cellular_component^nucleus`GO:0043565^molecular_function^sequence-specific DNA binding`GO:0003700^molecular_function^DNA binding transcription factor activity`GO:0030154^biological_process^cell differentiation`GO:0051301^biological_process^cell division`GO:0007623^biological_process^circadian rhythm`GO:0006355^biological_process^regulation of transcription, DNA-templated`GO:0048768^bio…	.	.	.
TRINITY_DN113065_c0_g1	TRINITY_DN113065_c0_g1_i1	7SB1_SOYBN^7SB1_SOYBN^Q:38-373,H:256-362^39.474%ID^E:6.74e-12^RecName: Full=Basic 7S globulin;^Eukaryota; Viridiplantae; Streptophyta; Embryophyta; Tracheophyta; Spermatophyta; Magnoliophyta; eudicotyledons; Gunneridae; Pentapetalae; rosids; fabids; Fabales; Fabaceae; Papilionoideae; Phaseoleae; Glycine; Soja	.	TRINITY_DN113065_c0_g1_i1|m.240	63-407[+]	.	.	.	.	.	.	.	.	.	.
TRINITY_DN113065_c0_g1	TRINITY_DN113065_c0_g1_i1	7SB1_SOYBN^7SB1_SOYBN^Q:38-373,H:256-362^39.474%ID^E:6.74e-12^RecName: Full=Basic 7S globulin;^Eukaryota; Viridiplantae; Streptophyta; Embryophyta; Tracheophyta; Spermatophyta; Magnoliophyta; eudicotyledons; Gunneridae; Pentapetalae; rosids; fabids; Fabales; Fabaceae; Papilionoideae; Phaseoleae; Glycine; Soja	.	TRINITY_DN113065_c0_g1_i1|m.241	2-340[+]	7SB1_SOYBN^7SB1_SOYBN^Q:13-111,H:256-348^38%ID^E:2.2e-09^RecName: Full=Basic 7S globulin;^Eukaryota; Viridiplantae; Streptophyta; Embryophyta; Tracheophyta; Spermatophyta; Magnoliophyta; eudicotyledons; Gunneridae; Pentapetalae; rosids; fabids; Fabales; Fabaceae; Papilionoideae; Phaseoleae; Glycine; Soja	PF14541.5^TAXi_C^Xylanase inhibitor C-terminal^12-110^E:2.1e-23	.	.	ENOG410XNV7^aspartic	KEGG:gmx:547908	GO:0004190^molecular_function^aspartic-type endopeptidase activity`GO:0042802^molecular_function^identical protein binding`GO:0045735^molecular_function^nutrient reservoir activity`GO:0030163^biological_process^protein catabolic process`GO:0006508^biological_process^proteolysis	.	.	.
TRINITY_DN113077_c0_g1	TRINITY_DN113077_c0_g1_i1	FER_CAPAN^FER_CAPAN^Q:296-736,H:1-144^61.905%ID^E:3.57e-45^RecName: Full=Ferredoxin, chloroplastic;^Eukaryota; Viridiplantae; Streptophyta; Embryophyta; Tracheophyta; Spermatophyta; Magnoliophyta; eudicotyledons; Gunneridae; Pentapetalae; asterids; lamiids; Solanales; Solanaceae; Solanoideae; Capsiceae; Capsicum	.	TRINITY_DN113077_c0_g1_i1|m.242	296-739[+]	FER_CAPAN^FER_CAPAN^Q:1-147,H:1-144^67.347%ID^E:1.16e-68^RecName: Full=Ferredoxin, chloroplastic;^Eukaryota; Viridiplantae; Streptophyta; Embryophyta; Tracheophyta; Spermatophyta; Magnoliophyta; eudicotyledons; Gunneridae; Pentapetalae; asterids; lamiids; Solanales; Solanaceae; Solanoideae; Capsiceae; Capsicum	PF00111.26^Fer2^2Fe-2S iron-sulfur cluster binding domain^61-131^E:3.6e-19	.	.	.	.	GO:0009507^cellular_component^chloroplast`GO:0051537^molecular_function^2 iron, 2 sulfur cluster binding`GO:0009055^molecular_function^electron transfer activity`GO:0046872^molecular_function^metal ion binding`GO:0022900^biological_process^electron transport chain	GO:0009055^molecular_function^electron transfer activity`GO:0051536^molecular_function^iron-sulfur cluster binding	.	.
TRINITY_DN113084_c0_g1	TRINITY_DN113084_c0_g1_i1	.	.	TRINITY_DN113084_c0_g1_i1|m.243	235-2070[+]	.	.	.	.	.	.	.	.	.	.
TRINITY_DN113084_c0_g1	TRINITY_DN113084_c0_g1_i1	.	.	TRINITY_DN113084_c0_g1_i1|m.244	1872-1420[-]	.	.	.	.	.	.	.	.	.	.
TRINITY_DN113084_c0_g1	TRINITY_DN113084_c0_g1_i1	.	.	TRINITY_DN113084_c0_g1_i1|m.245	1865-1452[-]	.	.	.	.	.	.	.	.	.	.
TRINITY_DN113041_c0_g1	TRINITY_DN113041_c0_g1_i1	TRPB1_ARATH^TRPB1_ARATH^Q:291-1604,H:30-470^83.447%ID^E:0^RecName: Full=Tryptophan synthase beta chain 1, chloroplastic;^Eukaryota; Viridiplantae; Streptophyta; Embryophyta; Tracheophyta; Spermatophyta; Magnoliophyta; eudicotyledons; Gunneridae; Pentapetalae; rosids; malvids; Brassicales; Brassicaceae; Camelineae; Arabidopsis	.	TRINITY_DN113041_c0_g1_i1|m.246	189-1607[+]	TRPB1_ARATH^TRPB1_ARATH^Q:35-472,H:30-470^83.447%ID^E:0^RecName: Full=Tryptophan synthase beta chain 1, chloroplastic;^Eukaryota; Viridiplantae; Streptophyta; Embryophyta; Tracheophyta; Spermatophyta; Magnoliophyta; eudicotyledons; Gunneridae; Pentapetalae; rosids; malvids; Brassicales; Brassicaceae; Camelineae; Arabidopsis	PF00291.24^PALP^Pyridoxal-phosphate dependent enzyme^127-457^E:2.7e-47	.	.	COG0133^The beta subunit is responsible for the synthesis of L- tryptophan from indole and L-serine (By similarity)	KEGG:ath:AT5G54810`KO:K01696	GO:0009507^cellular_component^chloroplast`GO:0009570^cellular_component^chloroplast stroma`GO:0005886^cellular_component^plasma membrane`GO:0019904^molecular_function^protein domain specific binding`GO:0004834^molecular_function^tryptophan synthase activity`GO:0009684^biological_process^indoleacetic acid biosynthetic process`GO:0006979^biological_process^response to oxidative stress`GO:0009651^bi…	.	.	.
TRINITY_DN113060_c0_g2	TRINITY_DN113060_c0_g2_i1	.	.	.	.	.	.	.	.	.	.	.	.	.	.
TRINITY_DN113009_c0_g1	TRINITY_DN113009_c0_g1_i1	CDC48_SOYBN^CDC48_SOYBN^Q:111-857,H:1-248^91.566%ID^E:1.36e-164^RecName: Full=Cell division cycle protein 48 homolog;^Eukaryota; Viridiplantae; Streptophyta; Embryophyta; Tracheophyta; Spermatophyta; Magnoliophyta; eudicotyledons; Gunneridae; Pentapetalae; rosids; fabids; Fabales; Fabaceae; Papilionoideae; Phaseoleae; Glycine; Soja	.	TRINITY_DN113009_c0_g1_i1|m.247	3-857[+]	CDC48_SOYBN^CDC48_SOYBN^Q:37-285,H:1-248^91.566%ID^E:1.22e-164^RecName: Full=Cell division cycle protein 48 homolog;^Eukaryota; Viridiplantae; Streptophyta; Embryophyta; Tracheophyta; Spermatophyta; Magnoliophyta; eudicotyledons; Gunneridae; Pentapetalae; rosids; fabids; Fabales; Fabaceae; Papilionoideae; Phaseoleae; Glycine; Soja	PF02359.17^CDC48_N^Cell division protein 48 (CDC48), N-terminal domain^67-148^E:1.6e-22`PF02933.16^CDC48_2^Cell division protein 48 (CDC48), domain 2^170-232^E:2.5e-12	.	.	COG0464^Aaa atpase	KEGG:gmx:547850`KO:K13525	GO:0005886^cellular_component^plasma membrane`GO:0005524^molecular_function^ATP binding`GO:0016787^molecular_function^hydrolase activity`GO:0007049^biological_process^cell cycle	.	.	.
TRINITY_DN113009_c0_g1	TRINITY_DN113009_c0_g1_i1	CDC48_SOYBN^CDC48_SOYBN^Q:111-857,H:1-248^91.566%ID^E:1.36e-164^RecName: Full=Cell division cycle protein 48 homolog;^Eukaryota; Viridiplantae; Streptophyta; Embryophyta; Tracheophyta; Spermatophyta; Magnoliophyta; eudicotyledons; Gunneridae; Pentapetalae; rosids; fabids; Fabales; Fabaceae; Papilionoideae; Phaseoleae; Glycine; Soja	.	TRINITY_DN113009_c0_g1_i1|m.248	337-8[-]	.	.	.	.	.	.	.	.	.	.
TRINITY_DN113052_c0_g1	TRINITY_DN113052_c0_g1_i1	.	.	TRINITY_DN113052_c0_g1_i1|m.249	2-349[+]	.	.	.	.	.	.	.	.	.	.
TRINITY_DN113052_c0_g1	TRINITY_DN113052_c0_g1_i1	.	.	TRINITY_DN113052_c0_g1_i1|m.250	3-347[+]	.	.	.	.	.	.	.	.	.	.
TRINITY_DN113075_c0_g1	TRINITY_DN113075_c0_g1_i1	UMP2_ARATH^UMP2_ARATH^Q:313-615,H:19-113^54.455%ID^E:1.73e-19^RecName: Full=Uncharacterized protein At2g27730, mitochondrial;^Eukaryota; Viridiplantae; Streptophyta; Embryophyta; Tracheophyta; Spermatophyta; Magnoliophyta; eudicotyledons; Gunneridae; Pentapetalae; rosids; malvids; Brassicales; Brassicaceae; Camelineae; Arabidopsis	.	TRINITY_DN113075_c0_g1_i1|m.251	1-618[+]	UMP2_ARATH^UMP2_ARATH^Q:86-205,H:1-113^55.833%ID^E:4.08e-28^RecName: Full=Uncharacterized protein At2g27730, mitochondrial;^Eukaryota; Viridiplantae; Streptophyta; Embryophyta; Tracheophyta; Spermatophyta; Magnoliophyta; eudicotyledons; Gunneridae; Pentapetalae; rosids; malvids; Brassicales; Brassicaceae; Camelineae; Arabidopsis	.	.	ExpAA=17.96^PredHel=1^Topology=i176-193o	ENOG410Y847^NA	KEGG:ath:AT2G27730	GO:0031966^cellular_component^mitochondrial membrane`GO:0005747^cellular_component^mitochondrial respiratory chain complex I`GO:0005739^cellular_component^mitochondrion`GO:0005730^cellular_component^nucleolus`GO:0045271^cellular_component^respiratory chain complex I`GO:0005773^cellular_component^vacuole`GO:0005507^molecular_function^copper ion binding`GO:0009853^biological_process^photorespiration	.	.	.
TRINITY_DN113075_c0_g1	TRINITY_DN113075_c0_g1_i1	UMP2_ARATH^UMP2_ARATH^Q:313-615,H:19-113^54.455%ID^E:1.73e-19^RecName: Full=Uncharacterized protein At2g27730, mitochondrial;^Eukaryota; Viridiplantae; Streptophyta; Embryophyta; Tracheophyta; Spermatophyta; Magnoliophyta; eudicotyledons; Gunneridae; Pentapetalae; rosids; malvids; Brassicales; Brassicaceae; Camelineae; Arabidopsis	.	TRINITY_DN113075_c0_g1_i1|m.252	3-320[+]	.	.	.	.	.	.	.	.	.	.
TRINITY_DN113006_c0_g1	TRINITY_DN113006_c0_g1_i1	VATG1_TOBAC^VATG1_TOBAC^Q:29-214,H:49-110^79.032%ID^E:1.84e-25^RecName: Full=V-type proton ATPase subunit G 1;^Eukaryota; Viridiplantae; Streptophyta; Embryophyta; Tracheophyta; Spermatophyta; Magnoliophyta; eudicotyledons; Gunneridae; Pentapetalae; asterids; lamiids; Solanales; Solanaceae; Nicotianoideae; Nicotianeae; Nicotiana	.	.	.	.	.	.	.	.	.	GO:0016471^cellular_component^vacuolar proton-transporting V-type ATPase complex`GO:0016820^molecular_function^hydrolase activity, acting on acid anhydrides, catalyzing transmembrane movement of substances`GO:0015992^biological_process^proton transport	.	.	.
TRINITY_DN113081_c0_g1	TRINITY_DN113081_c0_g1_i1	.	.	.	.	.	.	.	.	.	.	.	.	.	.
TRINITY_DN113026_c0_g1	TRINITY_DN113026_c0_g1_i1	Y5258_ARATH^Y5258_ARATH^Q:181-510,H:1-110^56.364%ID^E:1.01e-39^RecName: Full=Stress-response A/B barrel domain-containing protein At5g22580 {ECO:0000305};^Eukaryota; Viridiplantae; Streptophyta; Embryophyta; Tracheophyta; Spermatophyta; Magnoliophyta; eudicotyledons; Gunneridae; Pentapetalae; rosids; malvids; Brassicales; Brassicaceae; Camelineae; Arabidopsis	.	TRINITY_DN113026_c0_g1_i1|m.253	417-43[-]	.	.	.	.	.	.	.	.	.	.
TRINITY_DN113026_c0_g1	TRINITY_DN113026_c0_g1_i1	Y5258_ARATH^Y5258_ARATH^Q:181-510,H:1-110^56.364%ID^E:1.01e-39^RecName: Full=Stress-response A/B barrel domain-containing protein At5g22580 {ECO:0000305};^Eukaryota; Viridiplantae; Streptophyta; Embryophyta; Tracheophyta; Spermatophyta; Magnoliophyta; eudicotyledons; Gunneridae; Pentapetalae; rosids; malvids; Brassicales; Brassicaceae; Camelineae; Arabidopsis	.	TRINITY_DN113026_c0_g1_i1|m.254	187-507[+]	Y5258_ARATH^Y5258_ARATH^Q:4-106,H:6-108^58.252%ID^E:7.01e-41^RecName: Full=Stress-response A/B barrel domain-containing protein At5g22580 {ECO:0000305};^Eukaryota; Viridiplantae; Streptophyta; Embryophyta; Tracheophyta; Spermatophyta; Magnoliophyta; eudicotyledons; Gunneridae; Pentapetalae; rosids; malvids; Brassicales; Brassicaceae; Camelineae; Arabidopsis	PF07876.11^Dabb^Stress responsive A/B Barrel Domain^5-96^E:9.7e-21	.	.	ENOG410YNSU^Dabb	KEGG:ath:AT5G22580	GO:0009507^cellular_component^chloroplast`GO:0046872^molecular_function^metal ion binding	.	.	.
TRINITY_DN113086_c0_g1	TRINITY_DN113086_c0_g1_i1	TL19_ARATH^TL19_ARATH^Q:538-990,H:79-229^80.795%ID^E:8.54e-86^RecName: Full=Thylakoid lumenal 19 kDa protein, chloroplastic;^Eukaryota; Viridiplantae; Streptophyta; Embryophyta; Tracheophyta; Spermatophyta; Magnoliophyta; eudicotyledons; Gunneridae; Pentapetalae; rosids; malvids; Brassicales; Brassicaceae; Camelineae; Arabidopsis	.	TRINITY_DN113086_c0_g1_i1|m.255	232-993[+]	TL19_ARATH^TL19_ARATH^Q:79-253,H:55-229^81.143%ID^E:5.21e-108^RecName: Full=Thylakoid lumenal 19 kDa protein, chloroplastic;^Eukaryota; Viridiplantae; Streptophyta; Embryophyta; Tracheophyta; Spermatophyta; Magnoliophyta; eudicotyledons; Gunneridae; Pentapetalae; rosids; malvids; Brassicales; Brassicaceae; Camelineae; Arabidopsis	PF01789.15^PsbP^PsbP^107-248^E:5.7e-07	sigP:1^17^0.508^YES	.	ENOG4111I6X^Thylakoid lumenal 19 kDa protein	KEGG:ath:AT3G63540	GO:0009543^cellular_component^chloroplast thylakoid lumen`GO:0019898^cellular_component^extrinsic component of membrane`GO:0009654^cellular_component^photosystem II oxygen evolving complex`GO:0005509^molecular_function^calcium ion binding`GO:0015979^biological_process^photosynthesis	GO:0005509^molecular_function^calcium ion binding`GO:0015979^biological_process^photosynthesis`GO:0009523^cellular_component^photosystem II`GO:0009654^cellular_component^photosystem II oxygen evolving complex`GO:0019898^cellular_component^extrinsic component of membrane	.	.
TRINITY_DN113005_c0_g1	TRINITY_DN113005_c0_g1_i1	.	.	.	.	.	.	.	.	.	.	.	.	.	.
TRINITY_DN113037_c0_g1	TRINITY_DN113037_c0_g1_i1	.	.	TRINITY_DN113037_c0_g1_i1|m.256	1-843[+]	.	.	.	.	.	.	.	.	.	.
TRINITY_DN113072_c0_g1	TRINITY_DN113072_c0_g1_i1	CIPK1_ARATH^CIPK1_ARATH^Q:193-1476,H:14-444^73.086%ID^E:0^RecName: Full=CBL-interacting serine/threonine-protein kinase 1;^Eukaryota; Viridiplantae; Streptophyta; Embryophyta; Tracheophyta; Spermatophyta; Magnoliophyta; eudicotyledons; Gunneridae; Pentapetalae; rosids; malvids; Brassicales; Brassicaceae; Camelineae; Arabidopsis	.	TRINITY_DN113072_c0_g1_i1|m.257	1-1488[+]	CIPK1_ARATH^CIPK1_ARATH^Q:56-492,H:5-444^72.5%ID^E:0^RecName: Full=CBL-interacting serine/threonine-protein kinase 1;^Eukaryota; Viridiplantae; Streptophyta; Embryophyta; Tracheophyta; Spermatophyta; Magnoliophyta; eudicotyledons; Gunneridae; Pentapetalae; rosids; malvids; Brassicales; Brassicaceae; Camelineae; Arabidopsis	PF00069.24^Pkinase^Protein kinase domain^71-326^E:3.8e-73`PF07714.16^Pkinase_Tyr^Protein tyrosine kinase^72-320^E:3.1e-40`PF03822.13^NAF^NAF domain^364-423^E:3.2e-17	.	.	COG0515^Serine Threonine protein kinase	KEGG:ath:AT3G17510	GO:0005737^cellular_component^cytoplasm`GO:0005634^cellular_component^nucleus`GO:0005886^cellular_component^plasma membrane`GO:0005524^molecular_function^ATP binding`GO:0004674^molecular_function^protein serine/threonine kinase activity`GO:0035556^biological_process^intracellular signal transduction`GO:0006468^biological_process^protein phosphorylation`GO:0009737^biological_process^response to ab…	GO:0004672^molecular_function^protein kinase activity`GO:0005524^molecular_function^ATP binding`GO:0006468^biological_process^protein phosphorylation`GO:0007165^biological_process^signal transduction	.	.
TRINITY_DN113003_c0_g1	TRINITY_DN113003_c0_g1_i1	.	.	.	.	.	.	.	.	.	.	.	.	.	.
TRINITY_DN113078_c0_g1	TRINITY_DN113078_c0_g1_i1	.	.	TRINITY_DN113078_c0_g1_i1|m.258	1196-1789[+]	.	.	.	.	.	.	.	.	.	.
TRINITY_DN113078_c0_g1	TRINITY_DN113078_c0_g1_i1	.	.	TRINITY_DN113078_c0_g1_i1|m.259	2013-2339[+]	.	.	.	.	.	.	.	.	.	.
TRINITY_DN113078_c0_g1	TRINITY_DN113078_c0_g1_i1	.	.	TRINITY_DN113078_c0_g1_i1|m.260	1501-1809[+]	.	.	.	.	.	.	.	.	.	.
TRINITY_DN113029_c0_g1	TRINITY_DN113029_c0_g1_i1	PMIR1_ARATH^PMIR1_ARATH^Q:1292-3421,H:454-1144^52.697%ID^E:5.51e-168^RecName: Full=Protein PLASTID MOVEMENT IMPAIRED 1-RELATED 1 {ECO:0000303|PubMed:26324877};^Eukaryota; Viridiplantae; Streptophyta; Embryophyta; Tracheophyta; Spermatophyta; Magnoliophyta; eudicotyledons; Gunneridae; Pentapetalae; rosids; malvids; Brassicales; Brassicaceae; Camelineae; Arabidopsis`PMIR1_ARATH^PMIR1_ARATH^Q:173-11…	.	TRINITY_DN113029_c0_g1_i1|m.261	134-3424[+]	PMIR1_ARATH^PMIR1_ARATH^Q:387-1096,H:454-1144^53.527%ID^E:0^RecName: Full=Protein PLASTID MOVEMENT IMPAIRED 1-RELATED 1 {ECO:0000303|PubMed:26324877};^Eukaryota; Viridiplantae; Streptophyta; Embryophyta; Tracheophyta; Spermatophyta; Magnoliophyta; eudicotyledons; Gunneridae; Pentapetalae; rosids; malvids; Brassicales; Brassicaceae; Camelineae; Arabidopsis`PMIR1_ARATH^PMIR1_ARATH^Q:14-355,H:8-338^…	PF10358.8^NT-C2^N-terminal C2 in EEIG1 and EHBP1 proteins^94-240^E:3.3e-15	.	.	ENOG410Y9MA^NA	KEGG:ath:AT5G20610	GO:0005737^cellular_component^cytoplasm`GO:0030048^biological_process^actin filament-based movement`GO:0009903^biological_process^chloroplast avoidance movement`GO:0009902^biological_process^chloroplast relocation`GO:0031022^biological_process^nuclear migration along microfilament`GO:0009637^biological_process^response to blue light	.	.	.
TRINITY_DN113029_c0_g1	TRINITY_DN113029_c0_g1_i1	PMIR1_ARATH^PMIR1_ARATH^Q:1292-3421,H:454-1144^52.697%ID^E:5.51e-168^RecName: Full=Protein PLASTID MOVEMENT IMPAIRED 1-RELATED 1 {ECO:0000303|PubMed:26324877};^Eukaryota; Viridiplantae; Streptophyta; Embryophyta; Tracheophyta; Spermatophyta; Magnoliophyta; eudicotyledons; Gunneridae; Pentapetalae; rosids; malvids; Brassicales; Brassicaceae; Camelineae; Arabidopsis`PMIR1_ARATH^PMIR1_ARATH^Q:173-11…	.	TRINITY_DN113029_c0_g1_i1|m.262	703-332[-]	.	.	.	.	.	.	.	.	.	.
TRINITY_DN113029_c0_g1	TRINITY_DN113029_c0_g1_i1	PMIR1_ARATH^PMIR1_ARATH^Q:1292-3421,H:454-1144^52.697%ID^E:5.51e-168^RecName: Full=Protein PLASTID MOVEMENT IMPAIRED 1-RELATED 1 {ECO:0000303|PubMed:26324877};^Eukaryota; Viridiplantae; Streptophyta; Embryophyta; Tracheophyta; Spermatophyta; Magnoliophyta; eudicotyledons; Gunneridae; Pentapetalae; rosids; malvids; Brassicales; Brassicaceae; Camelineae; Arabidopsis`PMIR1_ARATH^PMIR1_ARATH^Q:173-11…	.	TRINITY_DN113029_c0_g1_i1|m.263	378-76[-]	.	.	.	ExpAA=22.57^PredHel=1^Topology=o63-85i	.	.	.	.	.	.
TRINITY_DN113063_c0_g1	TRINITY_DN113063_c0_g1_i1	HRD3A_ARATH^HRD3A_ARATH^Q:232-2127,H:24-649^76.741%ID^E:0^RecName: Full=ERAD-associated E3 ubiquitin-protein ligase component HRD3A {ECO:0000305};^Eukaryota; Viridiplantae; Streptophyta; Embryophyta; Tracheophyta; Spermatophyta; Magnoliophyta; eudicotyledons; Gunneridae; Pentapetalae; rosids; malvids; Brassicales; Brassicaceae; Camelineae; Arabidopsis	.	TRINITY_DN113063_c0_g1_i1|m.264	166-2199[+]	HRD3A_ARATH^HRD3A_ARATH^Q:1-654,H:1-649^74.809%ID^E:0^RecName: Full=ERAD-associated E3 ubiquitin-protein ligase component HRD3A {ECO:0000305};^Eukaryota; Viridiplantae; Streptophyta; Embryophyta; Tracheophyta; Spermatophyta; Magnoliophyta; eudicotyledons; Gunneridae; Pentapetalae; rosids; malvids; Brassicales; Brassicaceae; Camelineae; Arabidopsis	PF08238.11^Sel1^Sel1 repeat^129-151^E:2200`PF13176.5^TPR_7^Tetratricopeptide repeat^170-192^E:0.034`PF08238.11^Sel1^Sel1 repeat^247-282^E:1.5e-08`PF08238.11^Sel1^Sel1 repeat^285-317^E:1.2e-05`PF08238.11^Sel1^Sel1 repeat^321-354^E:1.2e-05`PF08238.11^Sel1^Sel1 repeat^360-389^E:0.0018`PF08238.11^Sel1^Sel1 repeat^397-427^E:11`PF08238.11^Sel1^Sel1 repeat^442-460^E:22`PF08238.11^Sel1^Sel1 repeat^489-50…	sigP:1^24^0.9^YES	ExpAA=31.95^PredHel=1^Topology=i7-29o	COG0790^Sel1 domain protein repeat-containing protein	KEGG:ath:AT1G18260`KO:K14026	GO:0005783^cellular_component^endoplasmic reticulum`GO:0005789^cellular_component^endoplasmic reticulum membrane`GO:0016021^cellular_component^integral component of membrane`GO:0016020^cellular_component^membrane`GO:0042538^biological_process^hyperosmotic salinity response`GO:0030433^biological_process^ubiquitin-dependent ERAD pathway	GO:0005515^molecular_function^protein binding	.	.
TRINITY_DN113063_c0_g1	TRINITY_DN113063_c0_g1_i1	HRD3A_ARATH^HRD3A_ARATH^Q:232-2127,H:24-649^76.741%ID^E:0^RecName: Full=ERAD-associated E3 ubiquitin-protein ligase component HRD3A {ECO:0000305};^Eukaryota; Viridiplantae; Streptophyta; Embryophyta; Tracheophyta; Spermatophyta; Magnoliophyta; eudicotyledons; Gunneridae; Pentapetalae; rosids; malvids; Brassicales; Brassicaceae; Camelineae; Arabidopsis	.	TRINITY_DN113063_c0_g1_i1|m.265	1863-1522[-]	.	.	.	.	.	.	.	.	.	.
TRINITY_DN113027_c0_g1	TRINITY_DN113027_c0_g1_i1	C81E8_MEDTR^C81E8_MEDTR^Q:264-1739,H:7-490^47.904%ID^E:9.99e-135^RecName: Full=Cytochrome P450 81E8 {ECO:0000303|PubMed:14617078};^Eukaryota; Viridiplantae; Streptophyta; Embryophyta; Tracheophyta; Spermatophyta; Magnoliophyta; eudicotyledons; Gunneridae; Pentapetalae; rosids; fabids; Fabales; Fabaceae; Papilionoideae; Trifolieae; Medicago	.	TRINITY_DN113027_c0_g1_i1|m.266	267-1772[+]	C81E8_MEDTR^C81E8_MEDTR^Q:1-491,H:8-490^48%ID^E:6.58e-156^RecName: Full=Cytochrome P450 81E8 {ECO:0000303|PubMed:14617078};^Eukaryota; Viridiplantae; Streptophyta; Embryophyta; Tracheophyta; Spermatophyta; Magnoliophyta; eudicotyledons; Gunneridae; Pentapetalae; rosids; fabids; Fabales; Fabaceae; Papilionoideae; Trifolieae; Medicago	PF00067.21^p450^Cytochrome P450^28-480^E:9.5e-90	sigP:1^16^0.827^YES	.	.	.	GO:0016021^cellular_component^integral component of membrane`GO:0020037^molecular_function^heme binding`GO:0005506^molecular_function^iron ion binding`GO:0004497^molecular_function^monooxygenase activity`GO:0016705^molecular_function^oxidoreductase activity, acting on paired donors, with incorporation or reduction of molecular oxygen	GO:0005506^molecular_function^iron ion binding`GO:0016705^molecular_function^oxidoreductase activity, acting on paired donors, with incorporation or reduction of molecular oxygen`GO:0020037^molecular_function^heme binding`GO:0055114^biological_process^oxidation-reduction process	.	.
TRINITY_DN113022_c0_g1	TRINITY_DN113022_c0_g1_i1	.	.	TRINITY_DN113022_c0_g1_i1|m.267	304-2[-]	.	.	.	.	.	.	.	.	.	.
TRINITY_DN113022_c0_g1	TRINITY_DN113022_c0_g1_i1	.	.	TRINITY_DN113022_c0_g1_i1|m.268	2-304[+]	.	PF03022.15^MRJP^Major royal jelly protein^35-94^E:0.0003	.	.	.	.	.	.	.	.
TRINITY_DN113040_c0_g1	TRINITY_DN113040_c0_g1_i1	ZDH17_ARATH^ZDH17_ARATH^Q:16-216,H:650-715^71.642%ID^E:2.28e-22^RecName: Full=Probable protein S-acyltransferase 19;^Eukaryota; Viridiplantae; Streptophyta; Embryophyta; Tracheophyta; Spermatophyta; Magnoliophyta; eudicotyledons; Gunneridae; Pentapetalae; rosids; malvids; Brassicales; Brassicaceae; Camelineae; Arabidopsis	.	.	.	.	.	.	.	COG5273^Zinc finger, DHHC-type containing	KEGG:ath:AT4G15080`KO:K20027	GO:0016021^cellular_component^integral component of membrane`GO:0005886^cellular_component^plasma membrane`GO:0019706^molecular_function^protein-cysteine S-palmitoyltransferase activity	.	.	.
TRINITY_DN113028_c0_g2	TRINITY_DN113028_c0_g2_i1	.	.	.	.	.	.	.	.	.	.	.	.	.	.
TRINITY_DN113069_c0_g1	TRINITY_DN113069_c0_g1_i1	CP19C_ARATH^CP19C_ARATH^Q:157-669,H:1-171^83.041%ID^E:3.78e-91^RecName: Full=Peptidyl-prolyl cis-trans isomerase CYP19-3;^Eukaryota; Viridiplantae; Streptophyta; Embryophyta; Tracheophyta; Spermatophyta; Magnoliophyta; eudicotyledons; Gunneridae; Pentapetalae; rosids; malvids; Brassicales; Brassicaceae; Camelineae; Arabidopsis	.	TRINITY_DN113069_c0_g1_i1|m.269	157-681[+]	CP19C_ARATH^CP19C_ARATH^Q:1-171,H:1-171^83.041%ID^E:8.07e-106^RecName: Full=Peptidyl-prolyl cis-trans isomerase CYP19-3;^Eukaryota; Viridiplantae; Streptophyta; Embryophyta; Tracheophyta; Spermatophyta; Magnoliophyta; eudicotyledons; Gunneridae; Pentapetalae; rosids; malvids; Brassicales; Brassicaceae; Camelineae; Arabidopsis	PF00160.20^Pro_isomerase^Cyclophilin type peptidyl-prolyl cis-trans isomerase/CLD^11-169^E:3.1e-48	.	.	COG0652^peptidyl-prolyl cis-trans isomerase activity	KEGG:ath:AT3G56070`KO:K01802	GO:0005829^cellular_component^cytosol`GO:0005794^cellular_component^Golgi apparatus`GO:0005739^cellular_component^mitochondrion`GO:0016018^molecular_function^cyclosporin A binding`GO:0003755^molecular_function^peptidyl-prolyl cis-trans isomerase activity`GO:0006457^biological_process^protein folding`GO:0046686^biological_process^response to cadmium ion`GO:0007165^biological_process^signal transdu…	GO:0003755^molecular_function^peptidyl-prolyl cis-trans isomerase activity`GO:0000413^biological_process^protein peptidyl-prolyl isomerization	.	.
TRINITY_DN113033_c0_g1	TRINITY_DN113033_c0_g1_i1	CIPKE_ARATH^CIPKE_ARATH^Q:355-1581,H:15-431^64.748%ID^E:1.24e-159^RecName: Full=CBL-interacting serine/threonine-protein kinase 14;^Eukaryota; Viridiplantae; Streptophyta; Embryophyta; Tracheophyta; Spermatophyta; Magnoliophyta; eudicotyledons; Gunneridae; Pentapetalae; rosids; malvids; Brassicales; Brassicaceae; Camelineae; Arabidopsis	.	TRINITY_DN113033_c0_g1_i1|m.270	298-1596[+]	CIPKE_ARATH^CIPKE_ARATH^Q:20-428,H:15-431^64.988%ID^E:0^RecName: Full=CBL-interacting serine/threonine-protein kinase 14;^Eukaryota; Viridiplantae; Streptophyta; Embryophyta; Tracheophyta; Spermatophyta; Magnoliophyta; eudicotyledons; Gunneridae; Pentapetalae; rosids; malvids; Brassicales; Brassicaceae; Camelineae; Arabidopsis	PF00069.24^Pkinase^Protein kinase domain^27-281^E:1.5e-72`PF07714.16^Pkinase_Tyr^Protein tyrosine kinase^28-277^E:5.4e-37`PF14531.5^Kinase-like^Kinase-like^122-265^E:1.5e-07`PF03822.13^NAF^NAF domain^305-363^E:8.2e-20	.	.	COG0515^Serine Threonine protein kinase	KEGG:ath:AT5G01820	GO:0005634^cellular_component^nucleus`GO:0009506^cellular_component^plasmodesma`GO:0005773^cellular_component^vacuole`GO:0005524^molecular_function^ATP binding`GO:0004674^molecular_function^protein serine/threonine kinase activity`GO:0035556^biological_process^intracellular signal transduction`GO:0018105^biological_process^peptidyl-serine phosphorylation`GO:0018107^biological_process^peptidyl-thr…	GO:0004672^molecular_function^protein kinase activity`GO:0005524^molecular_function^ATP binding`GO:0006468^biological_process^protein phosphorylation`GO:0007165^biological_process^signal transduction	.	.
TRINITY_DN113033_c0_g1	TRINITY_DN113033_c0_g1_i1	CIPKE_ARATH^CIPKE_ARATH^Q:355-1581,H:15-431^64.748%ID^E:1.24e-159^RecName: Full=CBL-interacting serine/threonine-protein kinase 14;^Eukaryota; Viridiplantae; Streptophyta; Embryophyta; Tracheophyta; Spermatophyta; Magnoliophyta; eudicotyledons; Gunneridae; Pentapetalae; rosids; malvids; Brassicales; Brassicaceae; Camelineae; Arabidopsis	.	TRINITY_DN113033_c0_g1_i1|m.271	1436-1014[-]	.	.	.	.	.	.	.	.	.	.
TRINITY_DN113033_c0_g1	TRINITY_DN113033_c0_g1_i1	CIPKE_ARATH^CIPKE_ARATH^Q:355-1581,H:15-431^64.748%ID^E:1.24e-159^RecName: Full=CBL-interacting serine/threonine-protein kinase 14;^Eukaryota; Viridiplantae; Streptophyta; Embryophyta; Tracheophyta; Spermatophyta; Magnoliophyta; eudicotyledons; Gunneridae; Pentapetalae; rosids; malvids; Brassicales; Brassicaceae; Camelineae; Arabidopsis	.	TRINITY_DN113033_c0_g1_i1|m.272	738-322[-]	.	.	.	.	.	.	.	.	.	.
TRINITY_DN113054_c0_g1	TRINITY_DN113054_c0_g1_i1	.	.	TRINITY_DN113054_c0_g1_i1|m.273	390-1[-]	.	.	.	.	.	.	.	.	.	.
TRINITY_DN113054_c0_g1	TRINITY_DN113054_c0_g1_i1	.	.	TRINITY_DN113054_c0_g1_i1|m.274	2-349[+]	.	.	.	.	.	.	.	.	.	.
TRINITY_DN113079_c0_g1	TRINITY_DN113079_c0_g1_i1	.	.	TRINITY_DN113079_c0_g1_i1|m.275	510-43[-]	.	.	.	.	.	.	.	.	.	.
TRINITY_DN113079_c0_g1	TRINITY_DN113079_c0_g1_i1	.	.	TRINITY_DN113079_c0_g1_i1|m.276	56-439[+]	.	.	.	ExpAA=22.23^PredHel=1^Topology=o41-63i	.	.	.	.	.	.
TRINITY_DN113021_c1_g1	TRINITY_DN113021_c1_g1_i1	EMC10_XENLA^EMC10_XENLA^Q:412-972,H:59-243^24.87%ID^E:1.18e-06^RecName: Full=ER membrane protein complex subunit 10;^Eukaryota; Metazoa; Chordata; Craniata; Vertebrata; Euteleostomi; Amphibia; Batrachia; Anura; Pipoidea; Pipidae; Xenopodinae; Xenopus; Xenopus	.	TRINITY_DN113021_c1_g1_i1|m.277	133-1074[+]	EMC10_XENLA^EMC10_XENLA^Q:94-280,H:59-243^24.87%ID^E:2.81e-07^RecName: Full=ER membrane protein complex subunit 10;^Eukaryota; Metazoa; Chordata; Craniata; Vertebrata; Euteleostomi; Amphibia; Batrachia; Anura; Pipoidea; Pipidae; Xenopodinae; Xenopus; Xenopus	.	sigP:1^32^0.835^YES	ExpAA=27.69^PredHel=1^Topology=i7-29o	.	KEGG:xla:100049769	GO:0072546^cellular_component^ER membrane protein complex`GO:0016021^cellular_component^integral component of membrane	.	.	.
TRINITY_DN113021_c1_g1	TRINITY_DN113021_c1_g1_i1	EMC10_XENLA^EMC10_XENLA^Q:412-972,H:59-243^24.87%ID^E:1.18e-06^RecName: Full=ER membrane protein complex subunit 10;^Eukaryota; Metazoa; Chordata; Craniata; Vertebrata; Euteleostomi; Amphibia; Batrachia; Anura; Pipoidea; Pipidae; Xenopodinae; Xenopus; Xenopus	.	TRINITY_DN113021_c1_g1_i1|m.278	642-199[-]	.	.	.	.	.	.	.	.	.	.
TRINITY_DN113055_c0_g1	TRINITY_DN113055_c0_g1_i1	BGAL_VIBC3^BGAL_VIBC3^Q:429-3425,H:48-1016^41.977%ID^E:0^RecName: Full=Beta-galactosidase {ECO:0000255|HAMAP-Rule:MF_01687};^Bacteria; Proteobacteria; Gammaproteobacteria; Vibrionales; Vibrionaceae; Vibrio	.	TRINITY_DN113055_c0_g1_i1|m.279	168-3485[+]	BGAL_VIBC3^BGAL_VIBC3^Q:88-1086,H:48-1016^41.977%ID^E:0^RecName: Full=Beta-galactosidase {ECO:0000255|HAMAP-Rule:MF_01687};^Bacteria; Proteobacteria; Gammaproteobacteria; Vibrionales; Vibrionaceae; Vibrio	PF02837.17^Glyco_hydro_2_N^Glycosyl hydrolases family 2, sugar binding domain^88-259^E:1.4e-44`PF00703.20^Glyco_hydro_2^Glycosyl hydrolases family 2^261-390^E:1.4e-13`PF02836.16^Glyco_hydro_2_C^Glycosyl hydrolases family 2, TIM barrel domain^397-677^E:4.2e-96`PF16353.4^DUF4981^Domain of unknown function(DUF4981)^685-778^E:2.7e-14`PF02929.16^Bgal_small_N^Beta galactosidase small chain^812-1086^E:7…	.	.	COG3250^hydrolase family 2	KEGG:vco:VC0395_A1917`KEGG:vcr:VC395_2453`KO:K01190	GO:0009341^cellular_component^beta-galactosidase complex`GO:0004565^molecular_function^beta-galactosidase activity`GO:0030246^molecular_function^carbohydrate binding`GO:0046872^molecular_function^metal ion binding`GO:0005975^biological_process^carbohydrate metabolic process	GO:0004553^molecular_function^hydrolase activity, hydrolyzing O-glycosyl compounds`GO:0005975^biological_process^carbohydrate metabolic process`GO:0004565^molecular_function^beta-galactosidase activity`GO:0009341^cellular_component^beta-galactosidase complex	.	.
TRINITY_DN113055_c0_g1	TRINITY_DN113055_c0_g1_i1	BGAL_VIBC3^BGAL_VIBC3^Q:429-3425,H:48-1016^41.977%ID^E:0^RecName: Full=Beta-galactosidase {ECO:0000255|HAMAP-Rule:MF_01687};^Bacteria; Proteobacteria; Gammaproteobacteria; Vibrionales; Vibrionaceae; Vibrio	.	TRINITY_DN113055_c0_g1_i1|m.280	4909-5352[+]	.	.	.	ExpAA=22.12^PredHel=1^Topology=o83-105i	.	.	.	.	.	.
TRINITY_DN113055_c0_g1	TRINITY_DN113055_c0_g1_i1	BGAL_VIBC3^BGAL_VIBC3^Q:429-3425,H:48-1016^41.977%ID^E:0^RecName: Full=Beta-galactosidase {ECO:0000255|HAMAP-Rule:MF_01687};^Bacteria; Proteobacteria; Gammaproteobacteria; Vibrionales; Vibrionaceae; Vibrio	.	TRINITY_DN113055_c0_g1_i1|m.281	364-741[+]	.	.	.	ExpAA=58.09^PredHel=2^Topology=i40-62o66-88i	.	.	.	.	.	.
TRINITY_DN113055_c0_g1	TRINITY_DN113055_c0_g1_i1	BGAL_VIBC3^BGAL_VIBC3^Q:429-3425,H:48-1016^41.977%ID^E:0^RecName: Full=Beta-galactosidase {ECO:0000255|HAMAP-Rule:MF_01687};^Bacteria; Proteobacteria; Gammaproteobacteria; Vibrionales; Vibrionaceae; Vibrio	.	TRINITY_DN113055_c0_g1_i1|m.282	2825-2478[-]	.	.	.	.	.	.	.	.	.	.
TRINITY_DN113055_c0_g1	TRINITY_DN113055_c0_g1_i1	BGAL_VIBC3^BGAL_VIBC3^Q:429-3425,H:48-1016^41.977%ID^E:0^RecName: Full=Beta-galactosidase {ECO:0000255|HAMAP-Rule:MF_01687};^Bacteria; Proteobacteria; Gammaproteobacteria; Vibrionales; Vibrionaceae; Vibrio	.	TRINITY_DN113055_c0_g1_i1|m.283	3897-4211[+]	.	.	.	.	.	.	.	.	.	.
TRINITY_DN113044_c0_g1	TRINITY_DN113044_c0_g1_i1	NIC1_ARATH^NIC1_ARATH^Q:255-983,H:1-244^65.164%ID^E:1.54e-101^RecName: Full=Nicotinamidase 1 {ECO:0000305};^Eukaryota; Viridiplantae; Streptophyta; Embryophyta; Tracheophyta; Spermatophyta; Magnoliophyta; eudicotyledons; Gunneridae; Pentapetalae; rosids; malvids; Brassicales; Brassicaceae; Camelineae; Arabidopsis	.	TRINITY_DN113044_c0_g1_i1|m.284	255-998[+]	NIC1_ARATH^NIC1_ARATH^Q:1-243,H:1-244^65.164%ID^E:8.11e-123^RecName: Full=Nicotinamidase 1 {ECO:0000305};^Eukaryota; Viridiplantae; Streptophyta; Embryophyta; Tracheophyta; Spermatophyta; Magnoliophyta; eudicotyledons; Gunneridae; Pentapetalae; rosids; malvids; Brassicales; Brassicaceae; Camelineae; Arabidopsis	PF00857.19^Isochorismatase^Isochorismatase family^30-202^E:4.3e-29	.	.	ENOG4111HN4^Isochorismatase family	KEGG:ath:AT2G22570	GO:0005737^cellular_component^cytoplasm`GO:0008936^molecular_function^nicotinamidase activity`GO:0006769^biological_process^nicotinamide metabolic process`GO:0019365^biological_process^pyridine nucleotide salvage`GO:0009737^biological_process^response to abscisic acid	GO:0003824^molecular_function^catalytic activity`GO:0008152^biological_process^metabolic process	.	.
TRINITY_DN113012_c0_g1	TRINITY_DN113012_c0_g1_i1	CSPL9_RICCO^CSPL9_RICCO^Q:316-888,H:1-192^60.622%ID^E:2.33e-52^RecName: Full=CASP-like protein 1E1;^Eukaryota; Viridiplantae; Streptophyta; Embryophyta; Tracheophyta; Spermatophyta; Magnoliophyta; eudicotyledons; Gunneridae; Pentapetalae; rosids; fabids; Malpighiales; Euphorbiaceae; Acalyphoideae; Acalypheae; Ricinus	.	TRINITY_DN113012_c0_g1_i1|m.285	316-891[+]	CSPL9_RICCO^CSPL9_RICCO^Q:1-191,H:1-192^66.667%ID^E:1.39e-86^RecName: Full=CASP-like protein 1E1;^Eukaryota; Viridiplantae; Streptophyta; Embryophyta; Tracheophyta; Spermatophyta; Magnoliophyta; eudicotyledons; Gunneridae; Pentapetalae; rosids; fabids; Malpighiales; Euphorbiaceae; Acalyphoideae; Acalypheae; Ricinus	PF04535.11^DUF588^Domain of unknown function (DUF588)^23-173^E:6.8e-39	.	ExpAA=88.03^PredHel=4^Topology=i30-49o81-103i112-134o162-184i	.	.	GO:0016021^cellular_component^integral component of membrane`GO:0005886^cellular_component^plasma membrane	.	.	.
TRINITY_DN113082_c0_g1	TRINITY_DN113082_c0_g1_i1	MMTA2_MOUSE^MMTA2_MOUSE^Q:682-1074,H:1-122^47.727%ID^E:3.3e-22^RecName: Full=Multiple myeloma tumor-associated protein 2 homolog;^Eukaryota; Metazoa; Chordata; Craniata; Vertebrata; Euteleostomi; Mammalia; Eutheria; Euarchontoglires; Glires; Rodentia; Myomorpha; Muroidea; Muridae; Murinae; Mus; Mus	.	TRINITY_DN113082_c0_g1_i1|m.286	682-1380[+]	MMTA2_MOUSE^MMTA2_MOUSE^Q:1-131,H:1-122^47.727%ID^E:5.28e-30^RecName: Full=Multiple myeloma tumor-associated protein 2 homolog;^Eukaryota; Metazoa; Chordata; Craniata; Vertebrata; Euteleostomi; Mammalia; Eutheria; Euarchontoglires; Glires; Rodentia; Myomorpha; Muroidea; Muridae; Murinae; Mus; Mus	PF10159.8^MMtag^Kinase phosphorylation protein^8-85^E:2.1e-35	.	.	ENOG41123ER^Chromosome 1 open reading frame 35	KEGG:mmu:67862	GO:0003723^molecular_function^RNA binding	.	.	.
TRINITY_DN113038_c0_g3	TRINITY_DN113038_c0_g3_i1	P4KG7_ARATH^P4KG7_ARATH^Q:531-2426,H:1-650^61.069%ID^E:0^RecName: Full=Phosphatidylinositol 4-kinase gamma 7;^Eukaryota; Viridiplantae; Streptophyta; Embryophyta; Tracheophyta; Spermatophyta; Magnoliophyta; eudicotyledons; Gunneridae; Pentapetalae; rosids; malvids; Brassicales; Brassicaceae; Camelineae; Arabidopsis	.	TRINITY_DN113038_c0_g3_i1|m.287	531-2429[+]	P4KG7_ARATH^P4KG7_ARATH^Q:1-632,H:1-650^61.069%ID^E:0^RecName: Full=Phosphatidylinositol 4-kinase gamma 7;^Eukaryota; Viridiplantae; Streptophyta; Embryophyta; Tracheophyta; Spermatophyta; Magnoliophyta; eudicotyledons; Gunneridae; Pentapetalae; rosids; malvids; Brassicales; Brassicaceae; Camelineae; Arabidopsis	PF00454.26^PI3_PI4_kinase^Phosphatidylinositol 3- and 4-kinase^170-420^E:4.5e-47	.	.	ENOG410XP06^Phosphatidylinositol 4-kinase type	KEGG:ath:AT2G03890	GO:0004430^molecular_function^1-phosphatidylinositol 4-kinase activity`GO:0005524^molecular_function^ATP binding`GO:0046854^biological_process^phosphatidylinositol phosphorylation`GO:0046777^biological_process^protein autophosphorylation	GO:0016301^molecular_function^kinase activity	.	.
TRINITY_DN113056_c0_g1	TRINITY_DN113056_c0_g1_i1	EGC_CITJA^EGC_CITJA^Q:143-520,H:5-130^42.969%ID^E:1.15e-28^RecName: Full=EG45-like domain containing protein;^Eukaryota; Viridiplantae; Streptophyta; Embryophyta; Tracheophyta; Spermatophyta; Magnoliophyta; eudicotyledons; Gunneridae; Pentapetalae; rosids; malvids; Sapindales; Rutaceae; Aurantioideae; Citrus	.	TRINITY_DN113056_c0_g1_i1|m.288	137-526[+]	EGC_CITJA^EGC_CITJA^Q:3-128,H:5-130^42.969%ID^E:1e-30^RecName: Full=EG45-like domain containing protein;^Eukaryota; Viridiplantae; Streptophyta; Embryophyta; Tracheophyta; Spermatophyta; Magnoliophyta; eudicotyledons; Gunneridae; Pentapetalae; rosids; malvids; Sapindales; Rutaceae; Aurantioideae; Citrus	PF03330.17^DPBB_1^Lytic transglycolase^52-126^E:2.5e-16	sigP:1^21^0.842^YES	.	.	.	GO:0005576^cellular_component^extracellular region	.	.	.
TRINITY_DN113010_c0_g1	TRINITY_DN113010_c0_g1_i1	OSGEP_BOVIN^OSGEP_BOVIN^Q:567-1562,H:5-335^70.482%ID^E:8.21e-175^RecName: Full=Probable tRNA N6-adenosine threonylcarbamoyltransferase {ECO:0000255|HAMAP-Rule:MF_03180};^Eukaryota; Metazoa; Chordata; Craniata; Vertebrata; Euteleostomi; Mammalia; Eutheria; Laurasiatheria; Cetartiodactyla; Ruminantia; Pecora; Bovidae; Bovinae; Bos	.	TRINITY_DN113010_c0_g1_i1|m.289	549-1580[+]	OSGEP_BOVIN^OSGEP_BOVIN^Q:7-338,H:5-335^70.482%ID^E:9.68e-180^RecName: Full=Probable tRNA N6-adenosine threonylcarbamoyltransferase {ECO:0000255|HAMAP-Rule:MF_03180};^Eukaryota; Metazoa; Chordata; Craniata; Vertebrata; Euteleostomi; Mammalia; Eutheria; Laurasiatheria; Cetartiodactyla; Ruminantia; Pecora; Bovidae; Bovinae; Bos	PF00814.24^Peptidase_M22^Glycoprotease family^28-304^E:8.9e-91	.	.	COG0533^Required for the formation of a threonylcarbamoyl group on adenosine at position 37 (t(6)A37) in tRNAs that read codons beginning with adenine (By similarity)	KEGG:bta:507512`KO:K01409	GO:0005737^cellular_component^cytoplasm`GO:0000408^cellular_component^EKC/KEOPS complex`GO:0016607^cellular_component^nuclear speck`GO:0005634^cellular_component^nucleus`GO:0005886^cellular_component^plasma membrane`GO:0046872^molecular_function^metal ion binding`GO:0061711^molecular_function^N(6)-L-threonylcarbamoyladenine synthase`GO:0002949^biological_process^tRNA threonylcarbamoyladenosine mo…	.	.	.
TRINITY_DN113010_c0_g1	TRINITY_DN113010_c0_g1_i1	OSGEP_BOVIN^OSGEP_BOVIN^Q:567-1562,H:5-335^70.482%ID^E:8.21e-175^RecName: Full=Probable tRNA N6-adenosine threonylcarbamoyltransferase {ECO:0000255|HAMAP-Rule:MF_03180};^Eukaryota; Metazoa; Chordata; Craniata; Vertebrata; Euteleostomi; Mammalia; Eutheria; Laurasiatheria; Cetartiodactyla; Ruminantia; Pecora; Bovidae; Bovinae; Bos	.	TRINITY_DN113010_c0_g1_i1|m.290	1484-1059[-]	.	.	.	.	.	.	.	.	.	.
TRINITY_DN113010_c0_g1	TRINITY_DN113010_c0_g1_i1	OSGEP_BOVIN^OSGEP_BOVIN^Q:567-1562,H:5-335^70.482%ID^E:8.21e-175^RecName: Full=Probable tRNA N6-adenosine threonylcarbamoyltransferase {ECO:0000255|HAMAP-Rule:MF_03180};^Eukaryota; Metazoa; Chordata; Craniata; Vertebrata; Euteleostomi; Mammalia; Eutheria; Laurasiatheria; Cetartiodactyla; Ruminantia; Pecora; Bovidae; Bovinae; Bos	.	TRINITY_DN113010_c0_g1_i1|m.291	281-688[+]	.	.	.	.	.	.	.	.	.	.
TRINITY_DN113092_c0_g1	TRINITY_DN113092_c0_g1_i1	PP386_ARATH^PP386_ARATH^Q:2-1279,H:200-623^61.894%ID^E:0^RecName: Full=Pentatricopeptide repeat-containing protein At5g15340, mitochondrial;^Eukaryota; Viridiplantae; Streptophyta; Embryophyta; Tracheophyta; Spermatophyta; Magnoliophyta; eudicotyledons; Gunneridae; Pentapetalae; rosids; malvids; Brassicales; Brassicaceae; Camelineae; Arabidopsis`PP386_ARATH^PP386_ARATH^Q:2-766,H:66-359^23.906%ID^…	.	TRINITY_DN113092_c0_g1_i1|m.292	2-1282[+]	PP386_ARATH^PP386_ARATH^Q:1-426,H:200-623^61.894%ID^E:0^RecName: Full=Pentatricopeptide repeat-containing protein At5g15340, mitochondrial;^Eukaryota; Viridiplantae; Streptophyta; Embryophyta; Tracheophyta; Spermatophyta; Magnoliophyta; eudicotyledons; Gunneridae; Pentapetalae; rosids; malvids; Brassicales; Brassicaceae; Camelineae; Arabidopsis`PP386_ARATH^PP386_ARATH^Q:1-255,H:66-359^23.906%ID^E…	PF01535.19^PPR^PPR repeat^12-36^E:0.024`PF01535.19^PPR^PPR repeat^85-111^E:0.093`PF01535.19^PPR^PPR repeat^113-140^E:0.0095`PF01535.19^PPR^PPR repeat^185-208^E:0.0041`PF14432.5^DYW_deaminase^DYW family of nucleic acid deaminases^283-416^E:3.8e-36	.	ExpAA=41.60^PredHel=2^Topology=o10-32i45-67o	ENOG410Z7Z7^Pentatricopeptide repeat-containing protein	KEGG:ath:AT5G15340	GO:0043231^cellular_component^intracellular membrane-bounded organelle`GO:0005739^cellular_component^mitochondrion`GO:0004519^molecular_function^endonuclease activity`GO:0003723^molecular_function^RNA binding`GO:0008270^molecular_function^zinc ion binding`GO:0009451^biological_process^RNA modification	GO:0008270^molecular_function^zinc ion binding	.	.
TRINITY_DN113092_c0_g1	TRINITY_DN113092_c0_g1_i1	PP386_ARATH^PP386_ARATH^Q:2-1279,H:200-623^61.894%ID^E:0^RecName: Full=Pentatricopeptide repeat-containing protein At5g15340, mitochondrial;^Eukaryota; Viridiplantae; Streptophyta; Embryophyta; Tracheophyta; Spermatophyta; Magnoliophyta; eudicotyledons; Gunneridae; Pentapetalae; rosids; malvids; Brassicales; Brassicaceae; Camelineae; Arabidopsis`PP386_ARATH^PP386_ARATH^Q:2-766,H:66-359^23.906%ID^…	.	TRINITY_DN113092_c0_g1_i1|m.293	1119-1472[+]	.	.	.	ExpAA=23.41^PredHel=1^Topology=o32-54i	.	.	.	.	.	.
TRINITY_DN113032_c0_g1	TRINITY_DN113032_c0_g1_i1	C7A22_PANGI^C7A22_PANGI^Q:14-1156,H:143-524^59.948%ID^E:2.92e-164^RecName: Full=Cytochrome P450 CYP749A22;^Eukaryota; Viridiplantae; Streptophyta; Embryophyta; Tracheophyta; Spermatophyta; Magnoliophyta; eudicotyledons; Gunneridae; Pentapetalae; asterids; campanulids; Apiales; Araliaceae; Panax	.	TRINITY_DN113032_c0_g1_i1|m.294	2-1159[+]	C7A22_PANGI^C7A22_PANGI^Q:5-385,H:143-524^59.948%ID^E:1.74e-165^RecName: Full=Cytochrome P450 CYP749A22;^Eukaryota; Viridiplantae; Streptophyta; Embryophyta; Tracheophyta; Spermatophyta; Magnoliophyta; eudicotyledons; Gunneridae; Pentapetalae; asterids; campanulids; Apiales; Araliaceae; Panax	PF00067.21^p450^Cytochrome P450^10-360^E:2.2e-67	.	.	.	.	GO:0016021^cellular_component^integral component of membrane`GO:0020037^molecular_function^heme binding`GO:0005506^molecular_function^iron ion binding`GO:0004497^molecular_function^monooxygenase activity`GO:0016705^molecular_function^oxidoreductase activity, acting on paired donors, with incorporation or reduction of molecular oxygen	GO:0005506^molecular_function^iron ion binding`GO:0016705^molecular_function^oxidoreductase activity, acting on paired donors, with incorporation or reduction of molecular oxygen`GO:0020037^molecular_function^heme binding`GO:0055114^biological_process^oxidation-reduction process	.	.
TRINITY_DN113080_c0_g1	TRINITY_DN113080_c0_g1_i1	.	.	.	.	.	.	.	.	.	.	.	.	.	.
TRINITY_DN113020_c0_g1	TRINITY_DN113020_c0_g1_i1	CYSKP_SPIOL^CYSKP_SPIOL^Q:9-110,H:252-285^70.588%ID^E:4.66e-08^RecName: Full=Cysteine synthase, chloroplastic/chromoplastic;^Eukaryota; Viridiplantae; Streptophyta; Embryophyta; Tracheophyta; Spermatophyta; Magnoliophyta; eudicotyledons; Gunneridae; Pentapetalae; Caryophyllales; Chenopodiaceae; Chenopodioideae; Anserineae; Spinacia`CYSKP_SPIOL^CYSKP_SPIOL^Q:392-475,H:281-308^71.429%ID^E:4.6e-06^R…	.	.	.	.	.	.	.	.	.	GO:0009570^cellular_component^chloroplast stroma`GO:0009509^cellular_component^chromoplast`GO:0004124^molecular_function^cysteine synthase activity`GO:0016740^molecular_function^transferase activity`GO:0006535^biological_process^cysteine biosynthetic process from serine	.	.	.
TRINITY_DN113016_c0_g2	TRINITY_DN113016_c0_g2_i1	NIC2_ARATH^NIC2_ARATH^Q:80-661,H:1-195^69.231%ID^E:1.51e-98^RecName: Full=Nicotinamidase 2 {ECO:0000305};^Eukaryota; Viridiplantae; Streptophyta; Embryophyta; Tracheophyta; Spermatophyta; Magnoliophyta; eudicotyledons; Gunneridae; Pentapetalae; rosids; malvids; Brassicales; Brassicaceae; Camelineae; Arabidopsis	.	TRINITY_DN113016_c0_g2_i1|m.295	68-679[+]	NIC2_ARATH^NIC2_ARATH^Q:5-198,H:1-195^69.231%ID^E:1.95e-100^RecName: Full=Nicotinamidase 2 {ECO:0000305};^Eukaryota; Viridiplantae; Streptophyta; Embryophyta; Tracheophyta; Spermatophyta; Magnoliophyta; eudicotyledons; Gunneridae; Pentapetalae; rosids; malvids; Brassicales; Brassicaceae; Camelineae; Arabidopsis	PF00857.19^Isochorismatase^Isochorismatase family^25-190^E:9.3e-45	.	.	COG1535^isochorismatase	KEGG:ath:AT5G23230	GO:0008936^molecular_function^nicotinamidase activity`GO:0019674^biological_process^NAD metabolic process`GO:0019363^biological_process^pyridine nucleotide biosynthetic process	GO:0003824^molecular_function^catalytic activity`GO:0008152^biological_process^metabolic process	.	.
TRINITY_DN113051_c0_g1	TRINITY_DN113051_c0_g1_i1	MTND1_VITVI^MTND1_VITVI^Q:312-872,H:1-188^79.255%ID^E:1.21e-108^RecName: Full=1,2-dihydroxy-3-keto-5-methylthiopentene dioxygenase 1 {ECO:0000255|HAMAP-Rule:MF_03154};^Eukaryota; Viridiplantae; Streptophyta; Embryophyta; Tracheophyta; Spermatophyta; Magnoliophyta; eudicotyledons; Gunneridae; Pentapetalae; rosids; Vitales; Vitaceae; Vitis	.	TRINITY_DN113051_c0_g1_i1|m.296	312-875[+]	MTND1_VITVI^MTND1_VITVI^Q:1-187,H:1-188^79.255%ID^E:1.77e-112^RecName: Full=1,2-dihydroxy-3-keto-5-methylthiopentene dioxygenase 1 {ECO:0000255|HAMAP-Rule:MF_03154};^Eukaryota; Viridiplantae; Streptophyta; Embryophyta; Tracheophyta; Spermatophyta; Magnoliophyta; eudicotyledons; Gunneridae; Pentapetalae; rosids; Vitales; Vitaceae; Vitis	PF03079.13^ARD^ARD/ARD' family^5-158^E:1.6e-60`PF02311.18^AraC_binding^AraC-like ligand binding domain^85-156^E:1.8e-06`PF07883.10^Cupin_2^Cupin domain^88-146^E:1.8e-09	.	.	COG1791^Catalyzes 2 different reactions between oxygene and the acireductone 1,2-dihydroxy-3-keto-5-methylthiopentene (DHK-MTPene) depending upon the metal bound in the active site. Fe-containing acireductone dioxygenase (Fe-ARD) produces formate and 2-keto-4- methylthiobutyrate (KMTB), the alpha-ketoacid precursor of methionine in the methionine recycle pathway. Ni-containing acireductone dioxyg…	.	GO:0005737^cellular_component^cytoplasm`GO:0005634^cellular_component^nucleus`GO:0010309^molecular_function^acireductone dioxygenase [iron(II)-requiring] activity`GO:0046872^molecular_function^metal ion binding`GO:0019509^biological_process^L-methionine salvage from methylthioadenosine`GO:0006555^biological_process^methionine metabolic process	GO:0010309^molecular_function^acireductone dioxygenase [iron(II)-requiring] activity`GO:0055114^biological_process^oxidation-reduction process`GO:0006355^biological_process^regulation of transcription, DNA-templated	.	.
TRINITY_DN113051_c0_g1	TRINITY_DN113051_c0_g1_i1	MTND1_VITVI^MTND1_VITVI^Q:312-872,H:1-188^79.255%ID^E:1.21e-108^RecName: Full=1,2-dihydroxy-3-keto-5-methylthiopentene dioxygenase 1 {ECO:0000255|HAMAP-Rule:MF_03154};^Eukaryota; Viridiplantae; Streptophyta; Embryophyta; Tracheophyta; Spermatophyta; Magnoliophyta; eudicotyledons; Gunneridae; Pentapetalae; rosids; Vitales; Vitaceae; Vitis	.	TRINITY_DN113051_c0_g1_i1|m.297	584-285[-]	.	.	.	.	.	.	.	.	.	.
TRINITY_DN113051_c1_g1	TRINITY_DN113051_c1_g1_i1	.	.	.	.	.	.	.	.	.	.	.	.	.	.
TRINITY_DN113057_c0_g1	TRINITY_DN113057_c0_g1_i1	RIN4_ARATH^RIN4_ARATH^Q:240-449,H:143-206^37.838%ID^E:3e-06^RecName: Full=RPM1-interacting protein 4;^Eukaryota; Viridiplantae; Streptophyta; Embryophyta; Tracheophyta; Spermatophyta; Magnoliophyta; eudicotyledons; Gunneridae; Pentapetalae; rosids; malvids; Brassicales; Brassicaceae; Camelineae; Arabidopsis	.	.	.	.	.	.	.	ENOG410YR29^RPM1-interacting protein	KEGG:ath:AT3G25070`KO:K13456	GO:0012505^cellular_component^endomembrane system`GO:0019897^cellular_component^extrinsic component of plasma membrane`GO:0016020^cellular_component^membrane`GO:0005886^cellular_component^plasma membrane`GO:0010204^biological_process^defense response signaling pathway, resistance gene-independent`GO:0009816^biological_process^defense response to bacterium, incompatible interaction`GO:0034051^biol…	.	.	.
TRINITY_DN113085_c1_g3	TRINITY_DN113085_c1_g3_i1	ISPG_ARATH^ISPG_ARATH^Q:104-424,H:1-112^65.179%ID^E:2.96e-44^RecName: Full=4-hydroxy-3-methylbut-2-en-1-yl diphosphate synthase (ferredoxin), chloroplastic;^Eukaryota; Viridiplantae; Streptophyta; Embryophyta; Tracheophyta; Spermatophyta; Magnoliophyta; eudicotyledons; Gunneridae; Pentapetalae; rosids; malvids; Brassicales; Brassicaceae; Camelineae; Arabidopsis	.	TRINITY_DN113085_c1_g3_i1|m.298	104-424[+]	ISPG_ARATH^ISPG_ARATH^Q:1-107,H:1-112^65.179%ID^E:6.97e-45^RecName: Full=4-hydroxy-3-methylbut-2-en-1-yl diphosphate synthase (ferredoxin), chloroplastic;^Eukaryota; Viridiplantae; Streptophyta; Embryophyta; Tracheophyta; Spermatophyta; Magnoliophyta; eudicotyledons; Gunneridae; Pentapetalae; rosids; malvids; Brassicales; Brassicaceae; Camelineae; Arabidopsis	.	.	.	COG0821^4-hydroxy-3-methylbut-2-en-1-yl diphosphate synthase activity	KEGG:ath:AT5G60600`KO:K03526	GO:0009507^cellular_component^chloroplast`GO:0009941^cellular_component^chloroplast envelope`GO:0009570^cellular_component^chloroplast stroma`GO:0051539^molecular_function^4 iron, 4 sulfur cluster binding`GO:0046429^molecular_function^4-hydroxy-3-methylbut-2-en-1-yl diphosphate synthase activity`GO:0005506^molecular_function^iron ion binding`GO:0019288^biological_process^isopentenyl diphosphate b…	.	.	.
TRINITY_DN113085_c2_g1	TRINITY_DN113085_c2_g1_i1	.	.	.	.	.	.	.	.	.	.	.	.	.	.
TRINITY_DN121613_c0_g1	TRINITY_DN121613_c0_g1_i1	.	.	.	.	.	.	.	.	.	.	.	.	.	.
TRINITY_DN121682_c0_g2	TRINITY_DN121682_c0_g2_i1	.	.	.	.	.	.	.	.	.	.	.	.	.	.
TRINITY_DN121620_c0_g1	TRINITY_DN121620_c0_g1_i1	.	.	.	.	.	.	.	.	.	.	.	.	.	.
TRINITY_DN121680_c0_g1	TRINITY_DN121680_c0_g1_i1	.	.	.	.	.	.	.	.	.	.	.	.	.	.
TRINITY_DN121695_c0_g1	TRINITY_DN121695_c0_g1_i1	FLA20_ARATH^FLA20_ARATH^Q:81-371,H:72-169^44.898%ID^E:6.34e-10^RecName: Full=Putative fasciclin-like arabinogalactan protein 20;^Eukaryota; Viridiplantae; Streptophyta; Embryophyta; Tracheophyta; Spermatophyta; Magnoliophyta; eudicotyledons; Gunneridae; Pentapetalae; rosids; malvids; Brassicales; Brassicaceae; Camelineae; Arabidopsis	.	TRINITY_DN121695_c0_g1_i1|m.299	3-371[+]	FLA20_ARATH^FLA20_ARATH^Q:27-123,H:72-169^44.898%ID^E:7.46e-17^RecName: Full=Putative fasciclin-like arabinogalactan protein 20;^Eukaryota; Viridiplantae; Streptophyta; Embryophyta; Tracheophyta; Spermatophyta; Magnoliophyta; eudicotyledons; Gunneridae; Pentapetalae; rosids; malvids; Brassicales; Brassicaceae; Camelineae; Arabidopsis	.	sigP:1^18^0.902^YES	.	ENOG4111A65^fasciclin-like arabinogalactan protein	KEGG:ath:AT5G40940	GO:0016021^cellular_component^integral component of membrane	.	.	.
TRINITY_DN121642_c0_g1	TRINITY_DN121642_c0_g1_i1	XG113_ARATH^XG113_ARATH^Q:2-85,H:423-450^89.286%ID^E:5.18e-08^RecName: Full=Arabinosyltransferase XEG113 {ECO:0000305};^Eukaryota; Viridiplantae; Streptophyta; Embryophyta; Tracheophyta; Spermatophyta; Magnoliophyta; eudicotyledons; Gunneridae; Pentapetalae; rosids; malvids; Brassicales; Brassicaceae; Camelineae; Arabidopsis	.	.	.	.	.	.	.	ENOG410ZPDM^Nucleotide-diphospho-sugar transferase	KEGG:ath:AT2G35610`KO:K20784	GO:0005768^cellular_component^endosome`GO:0005794^cellular_component^Golgi apparatus`GO:0000139^cellular_component^Golgi membrane`GO:0016021^cellular_component^integral component of membrane`GO:0005802^cellular_component^trans-Golgi network`GO:0052636^molecular_function^arabinosyltransferase activity`GO:0052325^biological_process^cell wall pectin biosynthetic process`GO:0006486^biological_process…	.	.	.
TRINITY_DN121643_c0_g1	TRINITY_DN121643_c0_g1_i1	.	.	.	.	.	.	.	.	.	.	.	.	.	.
TRINITY_DN121623_c0_g1	TRINITY_DN121623_c0_g1_i1	.	.	.	.	.	.	.	.	.	.	.	.	.	.
TRINITY_DN121697_c0_g1	TRINITY_DN121697_c0_g1_i1	.	.	.	.	.	.	.	.	.	.	.	.	.	.
TRINITY_DN121663_c0_g1	TRINITY_DN121663_c0_g1_i1	.	.	TRINITY_DN121663_c0_g1_i1|m.300	1-363[+]	.	.	.	.	.	.	.	.	.	.
TRINITY_DN121609_c0_g1	TRINITY_DN121609_c0_g1_i1	.	.	.	.	.	.	.	.	.	.	.	.	.	.
TRINITY_DN121603_c0_g1	TRINITY_DN121603_c0_g1_i1	TR130_ORYSJ^TR130_ORYSJ^Q:3-80,H:134-159^76.923%ID^E:6.56e-06^RecName: Full=Trafficking protein particle complex II-specific subunit 130 homolog {ECO:0000305};^Eukaryota; Viridiplantae; Streptophyta; Embryophyta; Tracheophyta; Spermatophyta; Magnoliophyta; Liliopsida; Poales; Poaceae; BOP clade; Oryzoideae; Oryzeae; Oryzinae; Oryza; Oryza sativa	.	.	.	.	.	.	.	ENOG410XNVF^trafficking protein particle complex	KEGG:osa:4352484`KO:K20307	GO:0005829^cellular_component^cytosol`GO:0005769^cellular_component^early endosome`GO:0005802^cellular_component^trans-Golgi network`GO:1990071^cellular_component^TRAPPII protein complex`GO:0000919^biological_process^cell plate assembly`GO:0034498^biological_process^early endosome to Golgi transport`GO:0006891^biological_process^intra-Golgi vesicle-mediated transport	.	.	.
TRINITY_DN121672_c0_g2	TRINITY_DN121672_c0_g2_i1	.	.	.	.	.	.	.	.	.	.	.	.	.	.
TRINITY_DN121635_c0_g1	TRINITY_DN121635_c0_g1_i1	.	.	.	.	.	.	.	.	.	.	.	.	.	.
TRINITY_DN121691_c0_g1	TRINITY_DN121691_c0_g1_i1	HRD3_ORYSJ^HRD3_ORYSJ^Q:3-95,H:343-373^74.194%ID^E:3.14e-07^RecName: Full=ERAD-associated E3 ubiquitin-protein ligase component HRD3 {ECO:0000305};^Eukaryota; Viridiplantae; Streptophyta; Embryophyta; Tracheophyta; Spermatophyta; Magnoliophyta; Liliopsida; Poales; Poaceae; BOP clade; Oryzoideae; Oryzeae; Oryzinae; Oryza; Oryza sativa	.	.	.	.	.	.	.	COG0790^Sel1 domain protein repeat-containing protein	KEGG:osa:4332310`KO:K14026	GO:0005789^cellular_component^endoplasmic reticulum membrane`GO:0016021^cellular_component^integral component of membrane	.	.	.
TRINITY_DN121653_c0_g1	TRINITY_DN121653_c0_g1_i1	.	.	.	.	.	.	.	.	.	.	.	.	.	.
TRINITY_DN121604_c0_g1	TRINITY_DN121604_c0_g1_i1	.	.	.	.	.	.	.	.	.	.	.	.	.	.
TRINITY_DN121679_c0_g1	TRINITY_DN121679_c0_g1_i1	.	.	.	.	.	.	.	.	.	.	.	.	.	.
TRINITY_DN121671_c0_g1	TRINITY_DN121671_c0_g1_i1	.	.	.	.	.	.	.	.	.	.	.	.	.	.
TRINITY_DN121621_c0_g1	TRINITY_DN121621_c0_g1_i1	.	.	.	.	.	.	.	.	.	.	.	.	.	.
TRINITY_DN121634_c0_g6	TRINITY_DN121634_c0_g6_i1	.	.	TRINITY_DN121634_c0_g6_i1|m.301	1-309[+]	.	.	.	.	.	.	.	.	.	.
TRINITY_DN121675_c0_g1	TRINITY_DN121675_c0_g1_i1	.	.	.	.	.	.	.	.	.	.	.	.	.	.
TRINITY_DN121637_c0_g1	TRINITY_DN121637_c0_g1_i1	.	.	.	.	.	.	.	.	.	.	.	.	.	.
TRINITY_DN121636_c0_g1	TRINITY_DN121636_c0_g1_i1	IDHP_PIG^IDHP_PIG^Q:274-378,H:286-320^88.571%ID^E:4.07e-13^RecName: Full=Isocitrate dehydrogenase [NADP], mitochondrial;^Eukaryota; Metazoa; Chordata; Craniata; Vertebrata; Euteleostomi; Mammalia; Eutheria; Laurasiatheria; Cetartiodactyla; Suina; Suidae; Sus`IDHP_PIG^IDHP_PIG^Q:9-86,H:267-292^88.462%ID^E:9.96e-09^RecName: Full=Isocitrate dehydrogenase [NADP], mitochondrial;^Eukaryota; Metazoa; Ch…	.	.	.	.	.	.	.	COG0538^isocitrate dehydrogenase (NADp)	.	GO:0005739^cellular_component^mitochondrion`GO:0004450^molecular_function^isocitrate dehydrogenase (NADP+) activity`GO:0000287^molecular_function^magnesium ion binding`GO:0051287^molecular_function^NAD binding`GO:0006103^biological_process^2-oxoglutarate metabolic process`GO:0006097^biological_process^glyoxylate cycle`GO:0006102^biological_process^isocitrate metabolic process`GO:0006099^biologica…	.	.	.
TRINITY_DN121688_c0_g1	TRINITY_DN121688_c0_g1_i1	.	.	.	.	.	.	.	.	.	.	.	.	.	.
TRINITY_DN121657_c0_g1	TRINITY_DN121657_c0_g1_i1	.	.	.	.	.	.	.	.	.	.	.	.	.	.
TRINITY_DN121692_c0_g1	TRINITY_DN121692_c0_g1_i1	.	.	.	.	.	.	.	.	.	.	.	.	.	.
TRINITY_DN121656_c0_g1	TRINITY_DN121656_c0_g1_i1	B3GTH_ARATH^B3GTH_ARATH^Q:217-306,H:368-397^70%ID^E:7.91e-08^RecName: Full=Hydroxyproline O-galactosyltransferase GALT4 {ECO:0000303|PubMed:26690932};^Eukaryota; Viridiplantae; Streptophyta; Embryophyta; Tracheophyta; Spermatophyta; Magnoliophyta; eudicotyledons; Gunneridae; Pentapetalae; rosids; malvids; Brassicales; Brassicaceae; Camelineae; Arabidopsis	.	.	.	.	.	.	.	ENOG410ZZ1B^UDP-GlcNAc beta-Gal beta-1,3-N-acetylglucosaminyltransferase	KEGG:ath:AT1G27120`KO:K20843	GO:0005794^cellular_component^Golgi apparatus`GO:0000139^cellular_component^Golgi membrane`GO:0016021^cellular_component^integral component of membrane`GO:0030246^molecular_function^carbohydrate binding`GO:1990714^molecular_function^hydroxyproline O-galactosyltransferase activity`GO:0010405^biological_process^arabinogalactan protein metabolic process`GO:0018258^biological_process^protein O-linked…	.	.	.
TRINITY_DN121665_c0_g1	TRINITY_DN121665_c0_g1_i1	TAL1_FUSO4^TAL1_FUSO4^Q:3-497,H:35-199^84.848%ID^E:2.36e-89^RecName: Full=Transaldolase;^Eukaryota; Fungi; Dikarya; Ascomycota; Pezizomycotina; Sordariomycetes; Hypocreomycetidae; Hypocreales; Nectriaceae; Fusarium; Fusarium oxysporum species complex	.	TRINITY_DN121665_c0_g1_i1|m.302	3-497[+]	TAL1_FUSO4^TAL1_FUSO4^Q:1-165,H:35-199^84.848%ID^E:2.13e-96^RecName: Full=Transaldolase;^Eukaryota; Fungi; Dikarya; Ascomycota; Pezizomycotina; Sordariomycetes; Hypocreomycetidae; Hypocreales; Nectriaceae; Fusarium; Fusarium oxysporum species complex	PF00923.18^TAL_FSA^Transaldolase/Fructose-6-phosphate aldolase^1-164^E:2e-54	.	.	.	KEGG:fox:FOXG_03074`KO:K00616	GO:0005737^cellular_component^cytoplasm`GO:0004801^molecular_function^sedoheptulose-7-phosphate:D-glyceraldehyde-3-phosphate glyceronetransferase activity`GO:0005975^biological_process^carbohydrate metabolic process`GO:0006098^biological_process^pentose-phosphate shunt	GO:0005975^biological_process^carbohydrate metabolic process	.	.
TRINITY_DN121665_c0_g1	TRINITY_DN121665_c0_g1_i1	TAL1_FUSO4^TAL1_FUSO4^Q:3-497,H:35-199^84.848%ID^E:2.36e-89^RecName: Full=Transaldolase;^Eukaryota; Fungi; Dikarya; Ascomycota; Pezizomycotina; Sordariomycetes; Hypocreomycetidae; Hypocreales; Nectriaceae; Fusarium; Fusarium oxysporum species complex	.	TRINITY_DN121665_c0_g1_i1|m.303	497-15[-]	.	.	sigP:1^17^0.548^YES	.	.	.	.	.	.	.
TRINITY_DN121608_c0_g1	TRINITY_DN121608_c0_g1_i1	.	.	.	.	.	.	.	.	.	.	.	.	.	.
TRINITY_DN121650_c0_g1	TRINITY_DN121650_c0_g1_i1	.	.	TRINITY_DN121650_c0_g1_i1|m.304	1-321[+]	.	.	.	ExpAA=22.01^PredHel=1^Topology=o34-56i	.	.	.	.	.	.
TRINITY_DN121647_c0_g1	TRINITY_DN121647_c0_g1_i1	AP4E_ARATH^AP4E_ARATH^Q:1-102,H:582-615^70.588%ID^E:6.74e-08^RecName: Full=AP-4 complex subunit epsilon;^Eukaryota; Viridiplantae; Streptophyta; Embryophyta; Tracheophyta; Spermatophyta; Magnoliophyta; eudicotyledons; Gunneridae; Pentapetalae; rosids; malvids; Brassicales; Brassicaceae; Camelineae; Arabidopsis	.	.	.	.	.	.	.	ENOG410XPKK^Adaptor-related protein complex	KEGG:ath:AT1G31730`KO:K12400	GO:0030124^cellular_component^AP-4 adaptor complex`GO:0005905^cellular_component^clathrin-coated pit`GO:0005829^cellular_component^cytosol`GO:0005794^cellular_component^Golgi apparatus`GO:0009506^cellular_component^plasmodesma`GO:0006886^biological_process^intracellular protein transport`GO:0016192^biological_process^vesicle-mediated transport	.	.	.
TRINITY_DN106659_c0_g1	TRINITY_DN106659_c0_g1_i1	.	.	.	.	.	.	.	.	.	.	.	.	.	.
TRINITY_DN106676_c0_g1	TRINITY_DN106676_c0_g1_i1	METK1_ACTCH^METK1_ACTCH^Q:2-223,H:317-390^95.946%ID^E:1.21e-41^RecName: Full=S-adenosylmethionine synthase 1;^Eukaryota; Viridiplantae; Streptophyta; Embryophyta; Tracheophyta; Spermatophyta; Magnoliophyta; eudicotyledons; Gunneridae; Pentapetalae; asterids; Ericales; Actinidiaceae; Actinidia	.	.	.	.	.	.	.	.	.	GO:0005737^cellular_component^cytoplasm`GO:0005524^molecular_function^ATP binding`GO:0046872^molecular_function^metal ion binding`GO:0004478^molecular_function^methionine adenosyltransferase activity`GO:0006730^biological_process^one-carbon metabolic process`GO:0006556^biological_process^S-adenosylmethionine biosynthetic process	.	.	.
TRINITY_DN106688_c0_g1	TRINITY_DN106688_c0_g1_i1	F3ST_FLABI^F3ST_FLABI^Q:268-1179,H:2-311^44.516%ID^E:7.09e-92^RecName: Full=Flavonol 3-sulfotransferase;^Eukaryota; Viridiplantae; Streptophyta; Embryophyta; Tracheophyta; Spermatophyta; Magnoliophyta; eudicotyledons; Gunneridae; Pentapetalae; asterids; campanulids; Asterales; Asteraceae; Asteroideae; Heliantheae alliance; Tageteae; Flaveria	.	TRINITY_DN106688_c0_g1_i1|m.305	184-1200[+]	F3ST_FLABI^F3ST_FLABI^Q:29-332,H:2-311^44.516%ID^E:1.22e-95^RecName: Full=Flavonol 3-sulfotransferase;^Eukaryota; Viridiplantae; Streptophyta; Embryophyta; Tracheophyta; Spermatophyta; Magnoliophyta; eudicotyledons; Gunneridae; Pentapetalae; asterids; campanulids; Asterales; Asteraceae; Asteroideae; Heliantheae alliance; Tageteae; Flaveria	PF00685.26^Sulfotransfer_1^Sulfotransferase domain^72-329^E:1.5e-66	.	.	.	KEGG:ag:AAA61638`KO:K13270	GO:0005737^cellular_component^cytoplasm`GO:0008146^molecular_function^sulfotransferase activity	GO:0008146^molecular_function^sulfotransferase activity	.	.
TRINITY_DN106615_c0_g1	TRINITY_DN106615_c0_g1_i1	.	.	TRINITY_DN106615_c0_g1_i1|m.306	242-616[+]	.	.	.	.	.	.	.	.	.	.
TRINITY_DN106693_c0_g2	TRINITY_DN106693_c0_g2_i1	TAF8_ARATH^TAF8_ARATH^Q:561-1607,H:14-353^47.5%ID^E:2.71e-82^RecName: Full=Transcription initiation factor TFIID subunit 8;^Eukaryota; Viridiplantae; Streptophyta; Embryophyta; Tracheophyta; Spermatophyta; Magnoliophyta; eudicotyledons; Gunneridae; Pentapetalae; rosids; malvids; Brassicales; Brassicaceae; Camelineae; Arabidopsis	.	TRINITY_DN106693_c0_g2_i1|m.307	546-1610[+]	TAF8_ARATH^TAF8_ARATH^Q:6-354,H:14-353^47.5%ID^E:2.32e-96^RecName: Full=Transcription initiation factor TFIID subunit 8;^Eukaryota; Viridiplantae; Streptophyta; Embryophyta; Tracheophyta; Spermatophyta; Magnoliophyta; eudicotyledons; Gunneridae; Pentapetalae; rosids; malvids; Brassicales; Brassicaceae; Camelineae; Arabidopsis	PF07524.12^Bromo_TP^Bromodomain associated^21-89^E:6.4e-23`PF10406.8^TAF8_C^Transcription factor TFIID complex subunit 8 C-term^153-201^E:2e-20	.	.	ENOG410ZS4D^TAF3 RNA polymerase II, TATA box binding protein (TBP)-associated factor	KEGG:ath:AT4G34340`KO:K14649	GO:0005634^cellular_component^nucleus`GO:0046982^molecular_function^protein heterodimerization activity`GO:0006355^biological_process^regulation of transcription, DNA-templated`GO:0006351^biological_process^transcription, DNA-templated	.	.	.
TRINITY_DN106693_c0_g2	TRINITY_DN106693_c0_g2_i1	TAF8_ARATH^TAF8_ARATH^Q:561-1607,H:14-353^47.5%ID^E:2.71e-82^RecName: Full=Transcription initiation factor TFIID subunit 8;^Eukaryota; Viridiplantae; Streptophyta; Embryophyta; Tracheophyta; Spermatophyta; Magnoliophyta; eudicotyledons; Gunneridae; Pentapetalae; rosids; malvids; Brassicales; Brassicaceae; Camelineae; Arabidopsis	.	TRINITY_DN106693_c0_g2_i1|m.308	1579-1037[-]	.	.	sigP:1^18^0.482^YES	.	.	.	.	.	.	.
TRINITY_DN106678_c0_g1	TRINITY_DN106678_c0_g1_i1	.	.	.	.	.	.	.	.	.	.	.	.	.	.
TRINITY_DN106696_c0_g1	TRINITY_DN106696_c0_g1_i1	PAP_CITUN^PAP_CITUN^Q:231-1202,H:3-321^78.086%ID^E:2.63e-149^RecName: Full=Plastid-lipid-associated protein, chloroplastic;^Eukaryota; Viridiplantae; Streptophyta; Embryophyta; Tracheophyta; Spermatophyta; Magnoliophyta; eudicotyledons; Gunneridae; Pentapetalae; rosids; malvids; Sapindales; Rutaceae; Aurantioideae; Citrus	.	TRINITY_DN106696_c0_g1_i1|m.309	3-1211[+]	PAP_CITUN^PAP_CITUN^Q:77-400,H:3-321^78.086%ID^E:3.6e-173^RecName: Full=Plastid-lipid-associated protein, chloroplastic;^Eukaryota; Viridiplantae; Streptophyta; Embryophyta; Tracheophyta; Spermatophyta; Magnoliophyta; eudicotyledons; Gunneridae; Pentapetalae; rosids; malvids; Sapindales; Rutaceae; Aurantioideae; Citrus	PF04755.11^PAP_fibrillin^PAP_fibrillin^177-392^E:5.2e-80	.	.	.	.	GO:0009507^cellular_component^chloroplast	.	.	.
TRINITY_DN106692_c0_g1	TRINITY_DN106692_c0_g1_i1	P2C36_ARATH^P2C36_ARATH^Q:2-421,H:511-650^85%ID^E:3.27e-84^RecName: Full=Probable protein phosphatase 2C 36;^Eukaryota; Viridiplantae; Streptophyta; Embryophyta; Tracheophyta; Spermatophyta; Magnoliophyta; eudicotyledons; Gunneridae; Pentapetalae; rosids; malvids; Brassicales; Brassicaceae; Camelineae; Arabidopsis	.	TRINITY_DN106692_c0_g1_i1|m.310	2-424[+]	P2C36_ARATH^P2C36_ARATH^Q:1-140,H:511-650^85%ID^E:1.16e-84^RecName: Full=Probable protein phosphatase 2C 36;^Eukaryota; Viridiplantae; Streptophyta; Embryophyta; Tracheophyta; Spermatophyta; Magnoliophyta; eudicotyledons; Gunneridae; Pentapetalae; rosids; malvids; Brassicales; Brassicaceae; Camelineae; Arabidopsis	PF00481.20^PP2C^Protein phosphatase 2C^1-95^E:1.5e-12`PF07228.11^SpoIIE^Stage II sporulation protein E (SpoIIE)^51-130^E:0.00036	.	.	COG0631^Phosphatase	KEGG:ath:AT3G09400	GO:0005634^cellular_component^nucleus`GO:0046872^molecular_function^metal ion binding`GO:0004722^molecular_function^protein serine/threonine phosphatase activity	GO:0003824^molecular_function^catalytic activity	.	.
TRINITY_DN106607_c0_g1	TRINITY_DN106607_c0_g1_i1	BRO1_ARATH^BRO1_ARATH^Q:449-523,H:656-680^92%ID^E:5.98e-06^RecName: Full=Vacuolar-sorting protein BRO1 {ECO:0000305};^Eukaryota; Viridiplantae; Streptophyta; Embryophyta; Tracheophyta; Spermatophyta; Magnoliophyta; eudicotyledons; Gunneridae; Pentapetalae; rosids; malvids; Brassicales; Brassicaceae; Camelineae; Arabidopsis	.	.	.	.	.	.	.	ENOG410XQX6^Rhophilin, Rho GTPase binding protein	KEGG:ath:AT1G15130`KO:K12200	GO:0005737^cellular_component^cytoplasm`GO:0005829^cellular_component^cytosol`GO:0005770^cellular_component^late endosome`GO:0005771^cellular_component^multivesicular body`GO:0009506^cellular_component^plasmodesma`GO:0043621^molecular_function^protein self-association`GO:0043130^molecular_function^ubiquitin binding`GO:0036257^biological_process^multivesicular body organization`GO:0015031^biologic…	.	.	.
TRINITY_DN106699_c0_g3	TRINITY_DN106699_c0_g3_i1	.	.	.	.	.	.	.	.	.	.	.	.	.	.
TRINITY_DN106663_c0_g1	TRINITY_DN106663_c0_g1_i1	.	.	.	.	.	.	.	.	.	.	.	.	.	.
TRINITY_DN106618_c0_g1	TRINITY_DN106618_c0_g1_i1	RBSK_BACSU^RBSK_BACSU^Q:612-1508,H:8-292^36.12%ID^E:3.89e-34^RecName: Full=Ribokinase {ECO:0000255|HAMAP-Rule:MF_01987};^Bacteria; Firmicutes; Bacilli; Bacillales; Bacillaceae; Bacillus	.	TRINITY_DN106618_c0_g1_i1|m.311	387-1520[+]	RBSK_BACSU^RBSK_BACSU^Q:72-374,H:4-292^35.974%ID^E:7.85e-47^RecName: Full=Ribokinase {ECO:0000255|HAMAP-Rule:MF_01987};^Bacteria; Firmicutes; Bacilli; Bacillales; Bacillaceae; Bacillus	PF00294.23^PfkB^pfkB family carbohydrate kinase^72-366^E:1.4e-62`PF08543.11^Phos_pyr_kin^Phosphomethylpyrimidine kinase^243-349^E:1.8e-08	.	.	COG0524^pfkb domain protein	KEGG:bsu:BSU35920`KO:K00852	GO:0005829^cellular_component^cytosol`GO:0005524^molecular_function^ATP binding`GO:0019200^molecular_function^carbohydrate kinase activity`GO:0046872^molecular_function^metal ion binding`GO:0004747^molecular_function^ribokinase activity`GO:0046835^biological_process^carbohydrate phosphorylation`GO:0019303^biological_process^D-ribose catabolic process	.	.	.
TRINITY_DN106618_c0_g1	TRINITY_DN106618_c0_g1_i1	RBSK_BACSU^RBSK_BACSU^Q:612-1508,H:8-292^36.12%ID^E:3.89e-34^RecName: Full=Ribokinase {ECO:0000255|HAMAP-Rule:MF_01987};^Bacteria; Firmicutes; Bacilli; Bacillales; Bacillaceae; Bacillus	.	TRINITY_DN106618_c0_g1_i1|m.312	388-68[-]	.	.	sigP:1^15^0.56^YES	.	.	.	.	.	.	.
TRINITY_DN106618_c0_g1	TRINITY_DN106618_c0_g1_i1	RBSK_BACSU^RBSK_BACSU^Q:612-1508,H:8-292^36.12%ID^E:3.89e-34^RecName: Full=Ribokinase {ECO:0000255|HAMAP-Rule:MF_01987};^Bacteria; Firmicutes; Bacilli; Bacillales; Bacillaceae; Bacillus	.	TRINITY_DN106618_c0_g1_i1|m.313	968-651[-]	.	.	.	.	.	.	.	.	.	.
TRINITY_DN106679_c0_g1	TRINITY_DN106679_c0_g1_i1	SCYL2_MOUSE^SCYL2_MOUSE^Q:381-2123,H:30-603^32.492%ID^E:6.03e-78^RecName: Full=SCY1-like protein 2;^Eukaryota; Metazoa; Chordata; Craniata; Vertebrata; Euteleostomi; Mammalia; Eutheria; Euarchontoglires; Glires; Rodentia; Myomorpha; Muroidea; Muridae; Murinae; Mus; Mus	.	TRINITY_DN106679_c0_g1_i1|m.314	273-3047[+]	SCYL2_MOUSE^SCYL2_MOUSE^Q:12-617,H:5-603^31.987%ID^E:5.28e-91^RecName: Full=SCY1-like protein 2;^Eukaryota; Metazoa; Chordata; Craniata; Vertebrata; Euteleostomi; Mammalia; Eutheria; Euarchontoglires; Glires; Rodentia; Myomorpha; Muroidea; Muridae; Murinae; Mus; Mus	PF00069.24^Pkinase^Protein kinase domain^104-344^E:1.1e-22`PF07714.16^Pkinase_Tyr^Protein tyrosine kinase^105-334^E:7.8e-12	.	.	ENOG410XQ9T^SCY1-like 2 (S. cerevisiae)	KEGG:mmu:213326`KO:K17541	GO:0030136^cellular_component^clathrin-coated vesicle`GO:0010008^cellular_component^endosome membrane`GO:0005794^cellular_component^Golgi apparatus`GO:0048471^cellular_component^perinuclear region of cytoplasm`GO:0005524^molecular_function^ATP binding`GO:0004672^molecular_function^protein kinase activity`GO:0005102^molecular_function^receptor binding`GO:0008333^biological_process^endosome to lyso…	GO:0004672^molecular_function^protein kinase activity`GO:0005524^molecular_function^ATP binding`GO:0006468^biological_process^protein phosphorylation	.	.
TRINITY_DN106679_c0_g1	TRINITY_DN106679_c0_g1_i1	SCYL2_MOUSE^SCYL2_MOUSE^Q:381-2123,H:30-603^32.492%ID^E:6.03e-78^RecName: Full=SCY1-like protein 2;^Eukaryota; Metazoa; Chordata; Craniata; Vertebrata; Euteleostomi; Mammalia; Eutheria; Euarchontoglires; Glires; Rodentia; Myomorpha; Muroidea; Muridae; Murinae; Mus; Mus	.	TRINITY_DN106679_c0_g1_i1|m.315	845-294[-]	.	.	.	.	.	.	.	.	.	.
TRINITY_DN106679_c0_g1	TRINITY_DN106679_c0_g1_i1	SCYL2_MOUSE^SCYL2_MOUSE^Q:381-2123,H:30-603^32.492%ID^E:6.03e-78^RecName: Full=SCY1-like protein 2;^Eukaryota; Metazoa; Chordata; Craniata; Vertebrata; Euteleostomi; Mammalia; Eutheria; Euarchontoglires; Glires; Rodentia; Myomorpha; Muroidea; Muridae; Murinae; Mus; Mus	.	TRINITY_DN106679_c0_g1_i1|m.316	1513-1181[-]	.	.	.	.	.	.	.	.	.	.
TRINITY_DN106667_c0_g1	TRINITY_DN106667_c0_g1_i1	.	.	TRINITY_DN106667_c0_g1_i1|m.317	150-587[+]	.	.	.	.	.	.	.	.	.	.
TRINITY_DN106700_c0_g1	TRINITY_DN106700_c0_g1_i1	.	.	TRINITY_DN106700_c0_g1_i1|m.318	3-302[+]	.	PF07814.12^WAPL^Wings apart-like protein regulation of heterochromatin^4-100^E:5.2e-16	.	.	.	.	.	.	.	.
TRINITY_DN106697_c0_g1	TRINITY_DN106697_c0_g1_i1	RL23_ARATH^RL23_ARATH^Q:44-454,H:1-137^97.08%ID^E:1.39e-94^RecName: Full=60S ribosomal protein L23;^Eukaryota; Viridiplantae; Streptophyta; Embryophyta; Tracheophyta; Spermatophyta; Magnoliophyta; eudicotyledons; Gunneridae; Pentapetalae; rosids; malvids; Brassicales; Brassicaceae; Camelineae; Arabidopsis	.	TRINITY_DN106697_c0_g1_i1|m.319	454-2[-]	.	.	.	.	.	.	.	.	.	.
TRINITY_DN106697_c0_g1	TRINITY_DN106697_c0_g1_i1	RL23_ARATH^RL23_ARATH^Q:44-454,H:1-137^97.08%ID^E:1.39e-94^RecName: Full=60S ribosomal protein L23;^Eukaryota; Viridiplantae; Streptophyta; Embryophyta; Tracheophyta; Spermatophyta; Magnoliophyta; eudicotyledons; Gunneridae; Pentapetalae; rosids; malvids; Brassicales; Brassicaceae; Camelineae; Arabidopsis	.	TRINITY_DN106697_c0_g1_i1|m.320	44-454[+]	RL23_ARATH^RL23_ARATH^Q:1-137,H:1-137^97.08%ID^E:7.06e-95^RecName: Full=60S ribosomal protein L23;^Eukaryota; Viridiplantae; Streptophyta; Embryophyta; Tracheophyta; Spermatophyta; Magnoliophyta; eudicotyledons; Gunneridae; Pentapetalae; rosids; malvids; Brassicales; Brassicaceae; Camelineae; Arabidopsis	PF00238.18^Ribosomal_L14^Ribosomal protein L14p/L23e^22-137^E:2.6e-35	.	.	COG0093^Binds to 23S rRNA. Forms part of two intersubunit bridges in the 70S ribosome (By similarity)	KEGG:ath:AT1G04480`KEGG:ath:AT2G33370`KEGG:ath:AT3G04400`KO:K02894	GO:0022625^cellular_component^cytosolic large ribosomal subunit`GO:0005730^cellular_component^nucleolus`GO:0070180^molecular_function^large ribosomal subunit rRNA binding`GO:0003735^molecular_function^structural constituent of ribosome`GO:0042256^biological_process^mature ribosome assembly`GO:0006412^biological_process^translation	GO:0003735^molecular_function^structural constituent of ribosome`GO:0006412^biological_process^translation`GO:0005840^cellular_component^ribosome	.	.
TRINITY_DN106697_c0_g1	TRINITY_DN106697_c0_g1_i1	RL23_ARATH^RL23_ARATH^Q:44-454,H:1-137^97.08%ID^E:1.39e-94^RecName: Full=60S ribosomal protein L23;^Eukaryota; Viridiplantae; Streptophyta; Embryophyta; Tracheophyta; Spermatophyta; Magnoliophyta; eudicotyledons; Gunneridae; Pentapetalae; rosids; malvids; Brassicales; Brassicaceae; Camelineae; Arabidopsis	.	TRINITY_DN106697_c0_g1_i1|m.321	453-154[-]	.	.	.	ExpAA=42.01^PredHel=2^Topology=o15-37i57-79o	.	.	.	.	.	.
TRINITY_DN106639_c0_g1	TRINITY_DN106639_c0_g1_i1	ACCO_ACTDE^ACCO_ACTDE^Q:109-1065,H:1-318^83.75%ID^E:0^RecName: Full=1-aminocyclopropane-1-carboxylate oxidase;^Eukaryota; Viridiplantae; Streptophyta; Embryophyta; Tracheophyta; Spermatophyta; Magnoliophyta; eudicotyledons; Gunneridae; Pentapetalae; asterids; Ericales; Actinidiaceae; Actinidia	.	TRINITY_DN106639_c0_g1_i1|m.322	109-1071[+]	ACCO_ACTDE^ACCO_ACTDE^Q:1-319,H:1-318^83.75%ID^E:0^RecName: Full=1-aminocyclopropane-1-carboxylate oxidase;^Eukaryota; Viridiplantae; Streptophyta; Embryophyta; Tracheophyta; Spermatophyta; Magnoliophyta; eudicotyledons; Gunneridae; Pentapetalae; asterids; Ericales; Actinidiaceae; Actinidia	PF14226.5^DIOX_N^non-haem dioxygenase in morphine synthesis N-terminal^5-92^E:2e-14`PF03171.19^2OG-FeII_Oxy^2OG-Fe(II) oxygenase superfamily^159-253^E:1.6e-26	.	.	.	.	GO:0009815^molecular_function^1-aminocyclopropane-1-carboxylate oxidase activity`GO:0031418^molecular_function^L-ascorbic acid binding`GO:0046872^molecular_function^metal ion binding`GO:0009693^biological_process^ethylene biosynthetic process`GO:0009835^biological_process^fruit ripening	GO:0016491^molecular_function^oxidoreductase activity`GO:0055114^biological_process^oxidation-reduction process	.	.
TRINITY_DN106635_c0_g1	TRINITY_DN106635_c0_g1_i1	PHF5B_ARATH^PHF5B_ARATH^Q:281-610,H:1-110^98.182%ID^E:1.18e-71^RecName: Full=PHD finger-like domain-containing protein 5B;^Eukaryota; Viridiplantae; Streptophyta; Embryophyta; Tracheophyta; Spermatophyta; Magnoliophyta; eudicotyledons; Gunneridae; Pentapetalae; rosids; malvids; Brassicales; Brassicaceae; Camelineae; Arabidopsis	.	TRINITY_DN106635_c0_g1_i1|m.323	281-613[+]	PHF5B_ARATH^PHF5B_ARATH^Q:1-110,H:1-110^98.182%ID^E:9.1e-75^RecName: Full=PHD finger-like domain-containing protein 5B;^Eukaryota; Viridiplantae; Streptophyta; Embryophyta; Tracheophyta; Spermatophyta; Magnoliophyta; eudicotyledons; Gunneridae; Pentapetalae; rosids; malvids; Brassicales; Brassicaceae; Camelineae; Arabidopsis	PF03660.13^PHF5^PHF5-like protein^1-104^E:1.2e-49	.	.	ENOG4111JIM^PHD finger protein 5A	KEGG:ath:AT1G07170`KEGG:ath:AT2G30000`KO:K12834	GO:0071013^cellular_component^catalytic step 2 spliceosome`GO:0071011^cellular_component^precatalytic spliceosome`GO:0005689^cellular_component^U12-type spliceosomal complex`GO:0005686^cellular_component^U2 snRNP`GO:0000398^biological_process^mRNA splicing, via spliceosome	.	.	.
TRINITY_DN106648_c0_g1	TRINITY_DN106648_c0_g1_i1	.	.	.	.	.	.	.	.	.	.	.	.	.	.
TRINITY_DN106619_c0_g1	TRINITY_DN106619_c0_g1_i1	OFT30_ARATH^OFT30_ARATH^Q:314-1672,H:49-505^62.69%ID^E:0^RecName: Full=O-fucosyltransferase 30 {ECO:0000305};^Eukaryota; Viridiplantae; Streptophyta; Embryophyta; Tracheophyta; Spermatophyta; Magnoliophyta; eudicotyledons; Gunneridae; Pentapetalae; rosids; malvids; Brassicales; Brassicaceae; Camelineae; Arabidopsis	.	TRINITY_DN106619_c0_g1_i1|m.324	47-1681[+]	OFT30_ARATH^OFT30_ARATH^Q:38-542,H:1-505^58.285%ID^E:0^RecName: Full=O-fucosyltransferase 30 {ECO:0000305};^Eukaryota; Viridiplantae; Streptophyta; Embryophyta; Tracheophyta; Spermatophyta; Magnoliophyta; eudicotyledons; Gunneridae; Pentapetalae; rosids; malvids; Brassicales; Brassicaceae; Camelineae; Arabidopsis	.	.	ExpAA=22.51^PredHel=1^Topology=i66-88o	ENOG4111F21^NA	KEGG:ath:AT4G17430	GO:0005768^cellular_component^endosome`GO:0005794^cellular_component^Golgi apparatus`GO:0016021^cellular_component^integral component of membrane`GO:0005802^cellular_component^trans-Golgi network`GO:0016757^molecular_function^transferase activity, transferring glycosyl groups	.	.	.
TRINITY_DN106610_c0_g1	TRINITY_DN106610_c0_g1_i1	.	.	.	.	.	.	.	.	.	.	.	.	.	.
TRINITY_DN106666_c0_g1	TRINITY_DN106666_c0_g1_i1	.	.	TRINITY_DN106666_c0_g1_i1|m.325	3-716[+]	.	.	.	.	.	.	.	.	.	.
TRINITY_DN106690_c0_g1	TRINITY_DN106690_c0_g1_i1	OST1B_ARATH^OST1B_ARATH^Q:164-1480,H:25-463^71.754%ID^E:0^RecName: Full=Dolichyl-diphosphooligosaccharide--protein glycosyltransferase subunit 1B;^Eukaryota; Viridiplantae; Streptophyta; Embryophyta; Tracheophyta; Spermatophyta; Magnoliophyta; eudicotyledons; Gunneridae; Pentapetalae; rosids; malvids; Brassicales; Brassicaceae; Camelineae; Arabidopsis	.	TRINITY_DN106690_c0_g1_i1|m.326	74-1483[+]	OST1B_ARATH^OST1B_ARATH^Q:14-467,H:8-461^70.264%ID^E:0^RecName: Full=Dolichyl-diphosphooligosaccharide--protein glycosyltransferase subunit 1B;^Eukaryota; Viridiplantae; Streptophyta; Embryophyta; Tracheophyta; Spermatophyta; Magnoliophyta; eudicotyledons; Gunneridae; Pentapetalae; rosids; malvids; Brassicales; Brassicaceae; Camelineae; Arabidopsis	PF04597.13^Ribophorin_I^Ribophorin I^34-460^E:2.8e-145	sigP:1^29^0.774^YES	ExpAA=41.78^PredHel=2^Topology=i13-35o444-463i	ENOG410XQVZ^ribophorin I	KEGG:ath:AT2G01720`KO:K12666	GO:0005783^cellular_component^endoplasmic reticulum`GO:0016021^cellular_component^integral component of membrane`GO:0008250^cellular_component^oligosaccharyltransferase complex`GO:0009505^cellular_component^plant-type cell wall`GO:0005886^cellular_component^plasma membrane`GO:0005774^cellular_component^vacuolar membrane`GO:0004579^molecular_function^dolichyl-diphosphooligosaccharide-protein glyco…	GO:0004579^molecular_function^dolichyl-diphosphooligosaccharide-protein glycotransferase activity`GO:0006486^biological_process^protein glycosylation`GO:0005783^cellular_component^endoplasmic reticulum`GO:0016021^cellular_component^integral component of membrane	.	.
TRINITY_DN106690_c0_g1	TRINITY_DN106690_c0_g1_i1	OST1B_ARATH^OST1B_ARATH^Q:164-1480,H:25-463^71.754%ID^E:0^RecName: Full=Dolichyl-diphosphooligosaccharide--protein glycosyltransferase subunit 1B;^Eukaryota; Viridiplantae; Streptophyta; Embryophyta; Tracheophyta; Spermatophyta; Magnoliophyta; eudicotyledons; Gunneridae; Pentapetalae; rosids; malvids; Brassicales; Brassicaceae; Camelineae; Arabidopsis	.	TRINITY_DN106690_c0_g1_i1|m.327	1967-1650[-]	.	.	sigP:1^22^0.69^YES	.	.	.	.	.	.	.
TRINITY_DN106682_c0_g1	TRINITY_DN106682_c0_g1_i1	.	.	.	.	.	.	.	.	.	.	.	.	.	.
TRINITY_DN106614_c0_g1	TRINITY_DN106614_c0_g1_i1	.	.	.	.	.	.	.	.	.	.	.	.	.	.
TRINITY_DN106622_c0_g1	TRINITY_DN106622_c0_g1_i1	DTX14_ARATH^DTX14_ARATH^Q:60-377,H:9-112^67.925%ID^E:2.15e-38^RecName: Full=Protein DETOXIFICATION 14 {ECO:0000303|PubMed:11739388};^Eukaryota; Viridiplantae; Streptophyta; Embryophyta; Tracheophyta; Spermatophyta; Magnoliophyta; eudicotyledons; Gunneridae; Pentapetalae; rosids; malvids; Brassicales; Brassicaceae; Camelineae; Arabidopsis	.	TRINITY_DN106622_c0_g1_i1|m.328	48-380[+]	DTX14_ARATH^DTX14_ARATH^Q:5-110,H:9-112^67.925%ID^E:1.06e-38^RecName: Full=Protein DETOXIFICATION 14 {ECO:0000303|PubMed:11739388};^Eukaryota; Viridiplantae; Streptophyta; Embryophyta; Tracheophyta; Spermatophyta; Magnoliophyta; eudicotyledons; Gunneridae; Pentapetalae; rosids; malvids; Brassicales; Brassicaceae; Camelineae; Arabidopsis	PF01554.17^MatE^MatE^34-110^E:6.9e-16	.	ExpAA=43.48^PredHel=2^Topology=i28-50o60-82i	COG0534^Mate efflux family protein	KEGG:ath:AT1G71140`KO:K03327	GO:0016021^cellular_component^integral component of membrane`GO:0005774^cellular_component^vacuolar membrane`GO:0015297^molecular_function^antiporter activity`GO:0015238^molecular_function^drug transmembrane transporter activity`GO:0006855^biological_process^drug transmembrane transport	GO:0015238^molecular_function^drug transmembrane transporter activity`GO:0015297^molecular_function^antiporter activity`GO:0006855^biological_process^drug transmembrane transport`GO:0055085^biological_process^transmembrane transport`GO:0016020^cellular_component^membrane	.	.
TRINITY_DN106686_c0_g1	TRINITY_DN106686_c0_g1_i1	NFD4_ARATH^NFD4_ARATH^Q:16-396,H:432-568^37.956%ID^E:1.49e-22^RecName: Full=Protein NUCLEAR FUSION DEFECTIVE 4 {ECO:0000303|PubMed:16698901};^Eukaryota; Viridiplantae; Streptophyta; Embryophyta; Tracheophyta; Spermatophyta; Magnoliophyta; eudicotyledons; Gunneridae; Pentapetalae; rosids; malvids; Brassicales; Brassicaceae; Camelineae; Arabidopsis	.	TRINITY_DN106686_c0_g1_i1|m.329	1-432[+]	NFD4_ARATH^NFD4_ARATH^Q:1-132,H:427-568^37.324%ID^E:1.7e-23^RecName: Full=Protein NUCLEAR FUSION DEFECTIVE 4 {ECO:0000303|PubMed:16698901};^Eukaryota; Viridiplantae; Streptophyta; Embryophyta; Tracheophyta; Spermatophyta; Magnoliophyta; eudicotyledons; Gunneridae; Pentapetalae; rosids; malvids; Brassicales; Brassicaceae; Camelineae; Arabidopsis	.	.	ExpAA=66.20^PredHel=3^Topology=o22-44i61-80o100-122i	ENOG41105RT^Nodulin-like	KEGG:ath:AT1G31470	GO:0016021^cellular_component^integral component of membrane`GO:0000741^biological_process^karyogamy`GO:0010197^biological_process^polar nucleus fusion`GO:0009651^biological_process^response to salt stress`GO:0006810^biological_process^transport	.	.	.
TRINITY_DN106686_c0_g1	TRINITY_DN106686_c0_g1_i1	NFD4_ARATH^NFD4_ARATH^Q:16-396,H:432-568^37.956%ID^E:1.49e-22^RecName: Full=Protein NUCLEAR FUSION DEFECTIVE 4 {ECO:0000303|PubMed:16698901};^Eukaryota; Viridiplantae; Streptophyta; Embryophyta; Tracheophyta; Spermatophyta; Magnoliophyta; eudicotyledons; Gunneridae; Pentapetalae; rosids; malvids; Brassicales; Brassicaceae; Camelineae; Arabidopsis	.	TRINITY_DN106686_c0_g1_i1|m.330	3-422[+]	.	.	.	.	.	.	.	.	.	.
TRINITY_DN106695_c0_g1	TRINITY_DN106695_c0_g1_i1	.	.	.	.	.	.	.	.	.	.	.	.	.	.
TRINITY_DN106628_c1_g1	TRINITY_DN106628_c1_g1_i1	.	.	TRINITY_DN106628_c1_g1_i1|m.331	2-469[+]	.	.	.	.	.	.	.	.	.	.
TRINITY_DN106625_c0_g6	TRINITY_DN106625_c0_g6_i1	TM245_RAT^TM245_RAT^Q:1466-2062,H:645-846^29.756%ID^E:7.91e-13^RecName: Full=Transmembrane protein 245;^Eukaryota; Metazoa; Chordata; Craniata; Vertebrata; Euteleostomi; Mammalia; Eutheria; Euarchontoglires; Glires; Rodentia; Myomorpha; Muroidea; Muridae; Murinae; Rattus	.	TRINITY_DN106625_c0_g6_i1|m.332	2-2074[+]	TM245_RAT^TM245_RAT^Q:489-687,H:645-846^29.756%ID^E:3.49e-13^RecName: Full=Transmembrane protein 245;^Eukaryota; Metazoa; Chordata; Craniata; Vertebrata; Euteleostomi; Mammalia; Eutheria; Euarchontoglires; Glires; Rodentia; Myomorpha; Muroidea; Muridae; Murinae; Rattus	PF01594.15^AI-2E_transport^AI-2E family transporter^482-624^E:8.1e-10	sigP:1^34^0.715^YES	ExpAA=236.09^PredHel=10^Topology=o15-37i108-130o169-191i223-245o292-314i487-509o545-567i574-596o611-628i641-663o	ENOG410XRXR^transmembrane protein 245	KEGG:rno:298020	GO:0016021^cellular_component^integral component of membrane	.	.	.
TRINITY_DN106625_c0_g6	TRINITY_DN106625_c0_g6_i1	TM245_RAT^TM245_RAT^Q:1466-2062,H:645-846^29.756%ID^E:7.91e-13^RecName: Full=Transmembrane protein 245;^Eukaryota; Metazoa; Chordata; Craniata; Vertebrata; Euteleostomi; Mammalia; Eutheria; Euarchontoglires; Glires; Rodentia; Myomorpha; Muroidea; Muridae; Murinae; Rattus	.	TRINITY_DN106625_c0_g6_i1|m.333	1-315[+]	.	.	sigP:1^37^0.534^YES	ExpAA=20.20^PredHel=1^Topology=o10-32i	.	.	.	.	.	.
TRINITY_DN106601_c0_g1	TRINITY_DN106601_c0_g1_i1	.	.	.	.	.	.	.	.	.	.	.	.	.	.
TRINITY_DN106668_c0_g4	TRINITY_DN106668_c0_g4_i1	.	.	.	.	.	.	.	.	.	.	.	.	.	.
TRINITY_DN106685_c0_g1	TRINITY_DN106685_c0_g1_i1	.	.	TRINITY_DN106685_c0_g1_i1|m.334	591-890[+]	.	.	.	.	.	.	.	.	.	.
TRINITY_DN106613_c0_g1	TRINITY_DN106613_c0_g1_i1	.	.	.	.	.	.	.	.	.	.	.	.	.	.
TRINITY_DN106603_c0_g1	TRINITY_DN106603_c0_g1_i1	FABH_ARATH^FABH_ARATH^Q:1-132,H:360-403^88.636%ID^E:5.74e-18^RecName: Full=3-oxoacyl-[acyl-carrier-protein] synthase III, chloroplastic;^Eukaryota; Viridiplantae; Streptophyta; Embryophyta; Tracheophyta; Spermatophyta; Magnoliophyta; eudicotyledons; Gunneridae; Pentapetalae; rosids; malvids; Brassicales; Brassicaceae; Camelineae; Arabidopsis	.	.	.	.	.	.	.	COG0332^Catalyzes the condensation reaction of fatty acid synthesis by the addition to an acyl acceptor of two carbons from malonyl-ACP. Catalyzes the first condensation reaction which initiates fatty acid synthesis and may therefore play a role in governing the total rate of fatty acid production. Possesses both acetoacetyl-ACP synthase and acetyl transacylase activities. Its substrate specifici…	KEGG:ath:AT1G62640`KO:K00648	GO:0009507^cellular_component^chloroplast`GO:0009570^cellular_component^chloroplast stroma`GO:0004315^molecular_function^3-oxoacyl-[acyl-carrier-protein] synthase activity`GO:0033818^molecular_function^beta-ketoacyl-acyl-carrier-protein synthase III activity`GO:0006633^biological_process^fatty acid biosynthetic process	.	.	.
TRINITY_DN106621_c0_g1	TRINITY_DN106621_c0_g1_i1	VINSY_RAUSE^VINSY_RAUSE^Q:1308-145,H:26-405^39.447%ID^E:6.96e-73^RecName: Full=Vinorine synthase;^Eukaryota; Viridiplantae; Streptophyta; Embryophyta; Tracheophyta; Spermatophyta; Magnoliophyta; eudicotyledons; Gunneridae; Pentapetalae; asterids; lamiids; Gentianales; Apocynaceae; Rauvolfioideae; Vinceae; Rauvolfiinae; Rauvolfia	.	TRINITY_DN106621_c0_g1_i1|m.335	1401-100[-]	VINSY_RAUSE^VINSY_RAUSE^Q:9-421,H:1-407^40.047%ID^E:1.34e-86^RecName: Full=Vinorine synthase;^Eukaryota; Viridiplantae; Streptophyta; Embryophyta; Tracheophyta; Spermatophyta; Magnoliophyta; eudicotyledons; Gunneridae; Pentapetalae; asterids; lamiids; Gentianales; Apocynaceae; Rauvolfioideae; Vinceae; Rauvolfiinae; Rauvolfia	PF02458.14^Transferase^Transferase family^12-427^E:1e-76	.	.	.	KEGG:ag:CAD89104`KO:K12694	GO:0050636^molecular_function^vinorine synthase activity`GO:0009820^biological_process^alkaloid metabolic process	GO:0016747^molecular_function^transferase activity, transferring acyl groups other than amino-acyl groups	.	.
TRINITY_DN106630_c0_g1	TRINITY_DN106630_c0_g1_i1	C7D47_PANGI^C7D47_PANGI^Q:300-7,H:198-295^65.306%ID^E:1.21e-38^RecName: Full=Cytochrome P450 CYP82D47;^Eukaryota; Viridiplantae; Streptophyta; Embryophyta; Tracheophyta; Spermatophyta; Magnoliophyta; eudicotyledons; Gunneridae; Pentapetalae; asterids; campanulids; Apiales; Araliaceae; Panax	.	TRINITY_DN106630_c0_g1_i1|m.336	300-1[-]	C7D47_PANGI^C7D47_PANGI^Q:1-98,H:198-295^65.306%ID^E:1.44e-39^RecName: Full=Cytochrome P450 CYP82D47;^Eukaryota; Viridiplantae; Streptophyta; Embryophyta; Tracheophyta; Spermatophyta; Magnoliophyta; eudicotyledons; Gunneridae; Pentapetalae; asterids; campanulids; Apiales; Araliaceae; Panax	PF00067.21^p450^Cytochrome P450^1-98^E:4.5e-29	.	.	.	.	GO:0020037^molecular_function^heme binding`GO:0005506^molecular_function^iron ion binding`GO:0004497^molecular_function^monooxygenase activity`GO:0016705^molecular_function^oxidoreductase activity, acting on paired donors, with incorporation or reduction of molecular oxygen	GO:0005506^molecular_function^iron ion binding`GO:0016705^molecular_function^oxidoreductase activity, acting on paired donors, with incorporation or reduction of molecular oxygen`GO:0020037^molecular_function^heme binding`GO:0055114^biological_process^oxidation-reduction process	.	.
TRINITY_DN106627_c0_g1	TRINITY_DN106627_c0_g1_i1	.	.	.	.	.	.	.	.	.	.	.	.	.	.
TRINITY_DN106644_c0_g1	TRINITY_DN106644_c0_g1_i1	ALDO4_ARATH^ALDO4_ARATH^Q:629-745,H:2-40^71.795%ID^E:1.2e-09^RecName: Full=Benzaldehyde dehydrogenase (NAD(+));^Eukaryota; Viridiplantae; Streptophyta; Embryophyta; Tracheophyta; Spermatophyta; Magnoliophyta; eudicotyledons; Gunneridae; Pentapetalae; rosids; malvids; Brassicales; Brassicaceae; Camelineae; Arabidopsis	.	.	.	.	.	.	.	COG4630^xanthine dehydrogenase`COG4631^xanthine dehydrogenase	KEGG:ath:AT1G04580	GO:0005829^cellular_component^cytosol`GO:0051537^molecular_function^2 iron, 2 sulfur cluster binding`GO:0018488^molecular_function^aryl-aldehyde oxidase activity`GO:0018479^molecular_function^benzaldehyde dehydrogenase (NAD+) activity`GO:0009055^molecular_function^electron transfer activity`GO:0050660^molecular_function^flavin adenine dinucleotide binding`GO:0050302^molecular_function^indole-3-ac…	.	.	.
TRINITY_DN106640_c0_g1	TRINITY_DN106640_c0_g1_i1	C96AF_ARATH^C96AF_ARATH^Q:156-1607,H:33-497^41.77%ID^E:1.03e-147^RecName: Full=Alkane hydroxylase MAH1 {ECO:0000303|PubMed:17905869};^Eukaryota; Viridiplantae; Streptophyta; Embryophyta; Tracheophyta; Spermatophyta; Magnoliophyta; eudicotyledons; Gunneridae; Pentapetalae; rosids; malvids; Brassicales; Brassicaceae; Camelineae; Arabidopsis	.	TRINITY_DN106640_c0_g1_i1|m.337	69-1613[+]	C96AF_ARATH^C96AF_ARATH^Q:30-513,H:33-497^41.77%ID^E:2.66e-150^RecName: Full=Alkane hydroxylase MAH1 {ECO:0000303|PubMed:17905869};^Eukaryota; Viridiplantae; Streptophyta; Embryophyta; Tracheophyta; Spermatophyta; Magnoliophyta; eudicotyledons; Gunneridae; Pentapetalae; rosids; malvids; Brassicales; Brassicaceae; Camelineae; Arabidopsis	PF00067.21^p450^Cytochrome P450^29-497^E:1.2e-62	.	.	COG2124^Cytochrome p450	KEGG:ath:AT1G57750`KO:K15405	GO:0005783^cellular_component^endoplasmic reticulum`GO:0005789^cellular_component^endoplasmic reticulum membrane`GO:0016021^cellular_component^integral component of membrane`GO:0020037^molecular_function^heme binding`GO:0005506^molecular_function^iron ion binding`GO:0080133^molecular_function^midchain alkane hydroxylase activity`GO:0010025^biological_process^wax biosynthetic process	GO:0005506^molecular_function^iron ion binding`GO:0016705^molecular_function^oxidoreductase activity, acting on paired donors, with incorporation or reduction of molecular oxygen`GO:0020037^molecular_function^heme binding`GO:0055114^biological_process^oxidation-reduction process	.	.
TRINITY_DN106671_c0_g1	TRINITY_DN106671_c0_g1_i1	SUT31_ARATH^SUT31_ARATH^Q:2-409,H:342-477^87.5%ID^E:2.2e-78^RecName: Full=Sulfate transporter 3.1;^Eukaryota; Viridiplantae; Streptophyta; Embryophyta; Tracheophyta; Spermatophyta; Magnoliophyta; eudicotyledons; Gunneridae; Pentapetalae; rosids; malvids; Brassicales; Brassicaceae; Camelineae; Arabidopsis	.	TRINITY_DN106671_c0_g1_i1|m.338	2-409[+]	SUT31_ARATH^SUT31_ARATH^Q:1-136,H:342-477^87.5%ID^E:1.98e-78^RecName: Full=Sulfate transporter 3.1;^Eukaryota; Viridiplantae; Streptophyta; Embryophyta; Tracheophyta; Spermatophyta; Magnoliophyta; eudicotyledons; Gunneridae; Pentapetalae; rosids; malvids; Brassicales; Brassicaceae; Camelineae; Arabidopsis	PF00916.19^Sulfate_transp^Sulfate permease family^1-120^E:4.2e-46	.	ExpAA=81.49^PredHel=3^Topology=i60-82o87-109i116-135o	COG0659^sulfate transporter	KEGG:ath:AT3G51895`KO:K17471	GO:0009507^cellular_component^chloroplast`GO:0005887^cellular_component^integral component of plasma membrane`GO:0008271^molecular_function^secondary active sulfate transmembrane transporter activity`GO:0015116^molecular_function^sulfate transmembrane transporter activity`GO:0015293^molecular_function^symporter activity`GO:0008272^biological_process^sulfate transport	GO:0015116^molecular_function^sulfate transmembrane transporter activity`GO:0008272^biological_process^sulfate transport`GO:0016021^cellular_component^integral component of membrane	.	.
TRINITY_DN106605_c0_g1	TRINITY_DN106605_c0_g1_i1	.	.	TRINITY_DN106605_c0_g1_i1|m.339	53-379[+]	.	PF14368.5^LTP_2^Probable lipid transfer^14-102^E:5.9e-12	sigP:1^25^0.898^YES	ExpAA=16.26^PredHel=1^Topology=i7-29o	.	.	.	.	.	.
TRINITY_DN106605_c0_g1	TRINITY_DN106605_c0_g1_i1	.	.	TRINITY_DN106605_c0_g1_i1|m.340	421-98[-]	.	.	.	.	.	.	.	.	.	.
TRINITY_DN106661_c0_g1	TRINITY_DN106661_c0_g1_i1	PEX4_ARATH^PEX4_ARATH^Q:835-921,H:85-113^96.552%ID^E:1.04e-10^RecName: Full=Protein PEROXIN-4;^Eukaryota; Viridiplantae; Streptophyta; Embryophyta; Tracheophyta; Spermatophyta; Magnoliophyta; eudicotyledons; Gunneridae; Pentapetalae; rosids; malvids; Brassicales; Brassicaceae; Camelineae; Arabidopsis	.	.	.	.	.	.	.	COG5078^ubiquitin-conjugating enzyme	KEGG:ath:AT5G25760`KO:K10689	GO:0005737^cellular_component^cytoplasm`GO:0005778^cellular_component^peroxisomal membrane`GO:0005524^molecular_function^ATP binding`GO:0061630^molecular_function^ubiquitin protein ligase activity`GO:0031625^molecular_function^ubiquitin protein ligase binding`GO:0004842^molecular_function^ubiquitin-protein transferase activity`GO:0006635^biological_process^fatty acid beta-oxidation`GO:0007031^bio…	.	.	.
TRINITY_DN106662_c0_g1	TRINITY_DN106662_c0_g1_i1	.	.	TRINITY_DN106662_c0_g1_i1|m.341	205-1284[+]	.	.	.	ExpAA=53.33^PredHel=3^Topology=o223-240i247-264o274-291i	.	.	.	.	.	.
TRINITY_DN106662_c0_g1	TRINITY_DN106662_c0_g1_i1	.	.	TRINITY_DN106662_c0_g1_i1|m.342	1187-852[-]	.	.	.	ExpAA=23.80^PredHel=1^Topology=o5-27i	.	.	.	.	.	.
TRINITY_DN106669_c0_g1	TRINITY_DN106669_c0_g1_i1	RS52_ARATH^RS52_ARATH^Q:689-766,H:32-57^80.769%ID^E:2.21e-06^RecName: Full=40S ribosomal protein S5-2;^Eukaryota; Viridiplantae; Streptophyta; Embryophyta; Tracheophyta; Spermatophyta; Magnoliophyta; eudicotyledons; Gunneridae; Pentapetalae; rosids; malvids; Brassicales; Brassicaceae; Camelineae; Arabidopsis	.	.	.	.	.	.	.	COG0049^One of the primary rRNA binding proteins, it binds directly to 16S rRNA where it nucleates assembly of the head domain of the 30S subunit. Is located at the subunit interface close to the decoding center, probably blocks exit of the E-site tRNA (By similarity)	KEGG:ath:AT3G11940`KO:K02989	GO:0005618^cellular_component^cell wall`GO:0009507^cellular_component^chloroplast`GO:0022626^cellular_component^cytosolic ribosome`GO:0022627^cellular_component^cytosolic small ribosomal subunit`GO:0005886^cellular_component^plasma membrane`GO:0009506^cellular_component^plasmodesma`GO:0005773^cellular_component^vacuole`GO:0003729^molecular_function^mRNA binding`GO:0019843^molecular_function^rRNA …	.	.	.
TRINITY_DN106626_c0_g1	TRINITY_DN106626_c0_g1_i1	EPHA_MYCTU^EPHA_MYCTU^Q:78-1001,H:9-319^34.483%ID^E:5.53e-56^RecName: Full=Epoxide hydrolase A {ECO:0000303|PubMed:16511284};^Bacteria; Actinobacteria; Corynebacteriales; Mycobacteriaceae; Mycobacterium; Mycobacterium tuberculosis complex	.	TRINITY_DN106626_c0_g1_i1|m.343	54-1004[+]	EPHA_MYCTU^EPHA_MYCTU^Q:9-313,H:9-316^34.81%ID^E:6.78e-66^RecName: Full=Epoxide hydrolase A {ECO:0000303|PubMed:16511284};^Bacteria; Actinobacteria; Corynebacteriales; Mycobacteriaceae; Mycobacterium; Mycobacterium tuberculosis complex	PF00561.19^Abhydrolase_1^alpha/beta hydrolase fold^25-140^E:8.4e-22`PF12146.7^Hydrolase_4^Serine aminopeptidase, S33^26-133^E:5.8e-09`PF12697.6^Abhydrolase_6^Alpha/beta hydrolase family^27-307^E:3.6e-22	.	.	ENOG410XVV6^Hydrolase	KEGG:mtu:Rv3617`KEGG:mtv:RVBD_3617	GO:0018742^molecular_function^epoxide hydrolase B activity`GO:0042803^molecular_function^protein homodimerization activity`GO:0009636^biological_process^response to toxic substance	.	.	.
TRINITY_DN106655_c0_g2	TRINITY_DN106655_c0_g2_i1	AT13B_ARATH^AT13B_ARATH^Q:326-2152,H:14-613^55.047%ID^E:4.66e-152^RecName: Full=Autophagy-related protein 13b {ECO:0000303|PubMed:12114572};^Eukaryota; Viridiplantae; Streptophyta; Embryophyta; Tracheophyta; Spermatophyta; Magnoliophyta; eudicotyledons; Gunneridae; Pentapetalae; rosids; malvids; Brassicales; Brassicaceae; Camelineae; Arabidopsis	.	TRINITY_DN106655_c0_g2_i1|m.344	296-2215[+]	AT13B_ARATH^AT13B_ARATH^Q:11-619,H:14-613^55.118%ID^E:3.14e-161^RecName: Full=Autophagy-related protein 13b {ECO:0000303|PubMed:12114572};^Eukaryota; Viridiplantae; Streptophyta; Embryophyta; Tracheophyta; Spermatophyta; Magnoliophyta; eudicotyledons; Gunneridae; Pentapetalae; rosids; malvids; Brassicales; Brassicaceae; Camelineae; Arabidopsis	PF10033.8^ATG13^Autophagy-related protein 13^19-259^E:9.5e-45	.	.	ENOG410Y4BP^Activates the ATG1 kinase in a nutritional condition dependent manner through the TOR pathway, leading to autophagy. Also invoved in cytoplasm to vacuole transport (Cvt) and more specifically in Cvt vesicle formation. Seems to play a role in the switching machinery regulating the conversion between the Cvt pathway and autophagy. Finally, ATG13 is also required for glycogen storage dur…	KEGG:ath:AT3G18770`KO:K08331	GO:1990316^cellular_component^ATG1/ULK1 kinase complex`GO:0005776^cellular_component^autophagosome`GO:0031410^cellular_component^cytoplasmic vesicle`GO:0006914^biological_process^autophagy`GO:0015031^biological_process^protein transport	GO:0006914^biological_process^autophagy`GO:1990316^cellular_component^ATG1/ULK1 kinase complex	.	.
TRINITY_DN106658_c0_g1	TRINITY_DN106658_c0_g1_i1	.	.	.	.	.	.	.	.	.	.	.	.	.	.
TRINITY_DN106641_c0_g1	TRINITY_DN106641_c0_g1_i1	GME1_ORYSI^GME1_ORYSI^Q:2-250,H:296-378^89.157%ID^E:2.62e-45^RecName: Full=GDP-mannose 3,5-epimerase 1;^Eukaryota; Viridiplantae; Streptophyta; Embryophyta; Tracheophyta; Spermatophyta; Magnoliophyta; Liliopsida; Poales; Poaceae; BOP clade; Oryzoideae; Oryzeae; Oryzinae; Oryza; Oryza sativa	.	.	.	.	.	.	.	COG0451^Nad-dependent epimerase dehydratase	.	GO:0047918^molecular_function^GDP-mannose 3,5-epimerase activity`GO:0051287^molecular_function^NAD binding`GO:0019853^biological_process^L-ascorbic acid biosynthetic process	.	.	.
TRINITY_DN106612_c0_g1	TRINITY_DN106612_c0_g1_i1	.	.	.	.	.	.	.	.	.	.	.	.	.	.
TRINITY_DN106689_c0_g1	TRINITY_DN106689_c0_g1_i1	PP385_ARATH^PP385_ARATH^Q:142-1569,H:20-522^38.867%ID^E:1.43e-115^RecName: Full=Pentatricopeptide repeat-containing protein At5g15300;^Eukaryota; Viridiplantae; Streptophyta; Embryophyta; Tracheophyta; Spermatophyta; Magnoliophyta; eudicotyledons; Gunneridae; Pentapetalae; rosids; malvids; Brassicales; Brassicaceae; Camelineae; Arabidopsis	.	TRINITY_DN106689_c0_g1_i1|m.345	67-1578[+]	PP385_ARATH^PP385_ARATH^Q:26-501,H:20-522^38.867%ID^E:8.7e-120^RecName: Full=Pentatricopeptide repeat-containing protein At5g15300;^Eukaryota; Viridiplantae; Streptophyta; Embryophyta; Tracheophyta; Spermatophyta; Magnoliophyta; eudicotyledons; Gunneridae; Pentapetalae; rosids; malvids; Brassicales; Brassicaceae; Camelineae; Arabidopsis	PF13041.5^PPR_2^PPR repeat family^81-127^E:3.2e-07`PF01535.19^PPR^PPR repeat^86-112^E:0.057`PF01535.19^PPR^PPR repeat^193-222^E:0.00011`PF13041.5^PPR_2^PPR repeat family^221-268^E:4.1e-13`PF13812.5^PPR_3^Pentatricopeptide repeat domain^222-270^E:2.2e-05`PF01535.19^PPR^PPR repeat^224-254^E:9.8e-09`PF01535.19^PPR^PPR repeat^296-322^E:3e-05`PF13041.5^PPR_2^PPR repeat family^323-366^E:1.1e-07`PF13812…	.	.	ENOG410Z7Z7^Pentatricopeptide repeat-containing protein	KEGG:ath:AT5G15300	GO:0043231^cellular_component^intracellular membrane-bounded organelle`GO:0004519^molecular_function^endonuclease activity`GO:0003723^molecular_function^RNA binding`GO:0009451^biological_process^RNA modification	.	.	.
TRINITY_DN106643_c0_g1	TRINITY_DN106643_c0_g1_i1	WTF1_ARATH^WTF1_ARATH^Q:214-1254,H:60-407^35.854%ID^E:2.64e-47^RecName: Full=Protein WHAT'S THIS FACTOR 1 homolog {ECO:0000305};^Eukaryota; Viridiplantae; Streptophyta; Embryophyta; Tracheophyta; Spermatophyta; Magnoliophyta; eudicotyledons; Gunneridae; Pentapetalae; rosids; malvids; Brassicales; Brassicaceae; Camelineae; Arabidopsis	.	TRINITY_DN106643_c0_g1_i1|m.346	157-1512[+]	WTF1_ARATH^WTF1_ARATH^Q:20-366,H:60-407^35.854%ID^E:3.89e-52^RecName: Full=Protein WHAT'S THIS FACTOR 1 homolog {ECO:0000305};^Eukaryota; Viridiplantae; Streptophyta; Embryophyta; Tracheophyta; Spermatophyta; Magnoliophyta; eudicotyledons; Gunneridae; Pentapetalae; rosids; malvids; Brassicales; Brassicaceae; Camelineae; Arabidopsis	PF11955.7^PORR^Plant organelle RNA recognition domain^41-370^E:3.9e-104	.	.	ENOG4111S5T^Plant organelle RNA recognition domain	KEGG:ath:AT4G01037	GO:0016787^molecular_function^hydrolase activity	.	.	.
TRINITY_DN106675_c0_g1	TRINITY_DN106675_c0_g1_i1	.	.	.	.	.	.	.	.	.	.	.	.	.	.
TRINITY_DN106608_c0_g1	TRINITY_DN106608_c0_g1_i1	CTL2_ARATH^CTL2_ARATH^Q:153-1025,H:24-319^83.108%ID^E:0^RecName: Full=Chitinase-like protein 2;^Eukaryota; Viridiplantae; Streptophyta; Embryophyta; Tracheophyta; Spermatophyta; Magnoliophyta; eudicotyledons; Gunneridae; Pentapetalae; rosids; malvids; Brassicales; Brassicaceae; Camelineae; Arabidopsis	.	TRINITY_DN106608_c0_g1_i1|m.347	99-1058[+]	CTL2_ARATH^CTL2_ARATH^Q:19-309,H:24-319^83.108%ID^E:0^RecName: Full=Chitinase-like protein 2;^Eukaryota; Viridiplantae; Streptophyta; Embryophyta; Tracheophyta; Spermatophyta; Magnoliophyta; eudicotyledons; Gunneridae; Pentapetalae; rosids; malvids; Brassicales; Brassicaceae; Camelineae; Arabidopsis	PF00182.18^Glyco_hydro_19^Chitinase class I^66-293^E:4e-62	sigP:1^22^0.885^YES	.	COG3979^chitinase	KEGG:ath:AT3G16920	GO:0005576^cellular_component^extracellular region`GO:0005975^biological_process^carbohydrate metabolic process`GO:0016998^biological_process^cell wall macromolecule catabolic process`GO:0006032^biological_process^chitin catabolic process	GO:0004568^molecular_function^chitinase activity`GO:0006032^biological_process^chitin catabolic process`GO:0016998^biological_process^cell wall macromolecule catabolic process	.	.
TRINITY_DN106646_c0_g3	TRINITY_DN106646_c0_g3_i1	.	.	.	.	.	.	.	.	.	.	.	.	.	.
TRINITY_DN106694_c0_g1	TRINITY_DN106694_c0_g1_i1	PPR56_ARATH^PPR56_ARATH^Q:102-2240,H:5-718^46.814%ID^E:0^RecName: Full=Pentatricopeptide repeat-containing protein At1g22960, mitochondrial;^Eukaryota; Viridiplantae; Streptophyta; Embryophyta; Tracheophyta; Spermatophyta; Magnoliophyta; eudicotyledons; Gunneridae; Pentapetalae; rosids; malvids; Brassicales; Brassicaceae; Camelineae; Arabidopsis	.	TRINITY_DN106694_c0_g1_i1|m.348	102-2264[+]	PPR56_ARATH^PPR56_ARATH^Q:1-713,H:5-718^46.814%ID^E:0^RecName: Full=Pentatricopeptide repeat-containing protein At1g22960, mitochondrial;^Eukaryota; Viridiplantae; Streptophyta; Embryophyta; Tracheophyta; Spermatophyta; Magnoliophyta; eudicotyledons; Gunneridae; Pentapetalae; rosids; malvids; Brassicales; Brassicaceae; Camelineae; Arabidopsis	PF13812.5^PPR_3^Pentatricopeptide repeat domain^183-240^E:1.8e-08`PF13812.5^PPR_3^Pentatricopeptide repeat domain^220-276^E:9.4e-12`PF12854.6^PPR_1^PPR repeat^225-257^E:1.1e-08`PF13041.5^PPR_2^PPR repeat family^228-277^E:3.4e-17`PF01535.19^PPR^PPR repeat^231-261^E:3.3e-07`PF12854.6^PPR_1^PPR repeat^260-291^E:2.7e-08`PF13041.5^PPR_2^PPR repeat family^263-310^E:1.7e-12`PF01535.19^PPR^PPR repeat^266…	.	.	ENOG410Z7Z7^Pentatricopeptide repeat-containing protein	KEGG:ath:AT1G22960	GO:0043231^cellular_component^intracellular membrane-bounded organelle`GO:0005739^cellular_component^mitochondrion`GO:0004519^molecular_function^endonuclease activity`GO:0003723^molecular_function^RNA binding`GO:0009451^biological_process^RNA modification	.	.	.
TRINITY_DN106694_c0_g1	TRINITY_DN106694_c0_g1_i1	PPR56_ARATH^PPR56_ARATH^Q:102-2240,H:5-718^46.814%ID^E:0^RecName: Full=Pentatricopeptide repeat-containing protein At1g22960, mitochondrial;^Eukaryota; Viridiplantae; Streptophyta; Embryophyta; Tracheophyta; Spermatophyta; Magnoliophyta; eudicotyledons; Gunneridae; Pentapetalae; rosids; malvids; Brassicales; Brassicaceae; Camelineae; Arabidopsis	.	TRINITY_DN106694_c0_g1_i1|m.349	530-150[-]	.	.	.	.	.	.	.	.	.	.
TRINITY_DN106694_c0_g1	TRINITY_DN106694_c0_g1_i1	PPR56_ARATH^PPR56_ARATH^Q:102-2240,H:5-718^46.814%ID^E:0^RecName: Full=Pentatricopeptide repeat-containing protein At1g22960, mitochondrial;^Eukaryota; Viridiplantae; Streptophyta; Embryophyta; Tracheophyta; Spermatophyta; Magnoliophyta; eudicotyledons; Gunneridae; Pentapetalae; rosids; malvids; Brassicales; Brassicaceae; Camelineae; Arabidopsis	.	TRINITY_DN106694_c0_g1_i1|m.350	2413-2748[+]	.	.	.	ExpAA=17.95^PredHel=1^Topology=o10-27i	.	.	.	.	.	.
TRINITY_DN106624_c0_g1	TRINITY_DN106624_c0_g1_i1	PP372_ARATH^PP372_ARATH^Q:338-1528,H:1-401^56.373%ID^E:2.12e-158^RecName: Full=Pentatricopeptide repeat-containing protein At5g09450, mitochondrial;^Eukaryota; Viridiplantae; Streptophyta; Embryophyta; Tracheophyta; Spermatophyta; Magnoliophyta; eudicotyledons; Gunneridae; Pentapetalae; rosids; malvids; Brassicales; Brassicaceae; Camelineae; Arabidopsis	.	TRINITY_DN106624_c0_g1_i1|m.351	338-1546[+]	PP372_ARATH^PP372_ARATH^Q:1-397,H:1-401^56.404%ID^E:7.06e-165^RecName: Full=Pentatricopeptide repeat-containing protein At5g09450, mitochondrial;^Eukaryota; Viridiplantae; Streptophyta; Embryophyta; Tracheophyta; Spermatophyta; Magnoliophyta; eudicotyledons; Gunneridae; Pentapetalae; rosids; malvids; Brassicales; Brassicaceae; Camelineae; Arabidopsis	PF01535.19^PPR^PPR repeat^155-183^E:3.2e-07`PF13812.5^PPR_3^Pentatricopeptide repeat domain^155-198^E:2.1e-05`PF13812.5^PPR_3^Pentatricopeptide repeat domain^184-233^E:1.4e-06`PF01535.19^PPR^PPR repeat^190-215^E:0.51`PF01535.19^PPR^PPR repeat^224-251^E:0.049	.	.	ENOG410Z7Z7^Pentatricopeptide repeat-containing protein	KEGG:ath:AT5G09450	GO:0043231^cellular_component^intracellular membrane-bounded organelle`GO:0005739^cellular_component^mitochondrion`GO:0004519^molecular_function^endonuclease activity`GO:0003723^molecular_function^RNA binding`GO:0009451^biological_process^RNA modification	.	.	.
TRINITY_DN106609_c0_g1	TRINITY_DN106609_c0_g1_i1	AB40G_ARATH^AB40G_ARATH^Q:53-937,H:687-948^65.085%ID^E:1.47e-124^RecName: Full=ABC transporter G family member 40 {ECO:0000303|PubMed:18299247};^Eukaryota; Viridiplantae; Streptophyta; Embryophyta; Tracheophyta; Spermatophyta; Magnoliophyta; eudicotyledons; Gunneridae; Pentapetalae; rosids; malvids; Brassicales; Brassicaceae; Camelineae; Arabidopsis`AB40G_ARATH^AB40G_ARATH^Q:638-898,H:166-253^34.…	.	TRINITY_DN106609_c0_g1_i1|m.352	2-937[+]	AB40G_ARATH^AB40G_ARATH^Q:1-312,H:670-948^65.064%ID^E:2.3e-134^RecName: Full=ABC transporter G family member 40 {ECO:0000303|PubMed:18299247};^Eukaryota; Viridiplantae; Streptophyta; Embryophyta; Tracheophyta; Spermatophyta; Magnoliophyta; eudicotyledons; Gunneridae; Pentapetalae; rosids; malvids; Brassicales; Brassicaceae; Camelineae; Arabidopsis`AB40G_ARATH^AB40G_ARATH^Q:213-299,H:166-253^34.09…	PF01061.23^ABC2_membrane^ABC-2 type transporter^2-49^E:1.1e-09`PF08370.10^PDR_assoc^Plant PDR ABC transporter associated^54-117^E:8.1e-27`PF00005.26^ABC_tran^ABC transporter^217-294^E:1.4e-09	sigP:1^20^0.871^YES	ExpAA=44.47^PredHel=2^Topology=o4-21i80-102o	COG0842^(ABC) transporter	KEGG:ath:AT1G15520	GO:0016021^cellular_component^integral component of membrane`GO:0005886^cellular_component^plasma membrane`GO:0005524^molecular_function^ATP binding`GO:0042626^molecular_function^ATPase activity, coupled to transmembrane movement of substances`GO:0080168^biological_process^abscisic acid transport`GO:0002229^biological_process^defense response to oomycetes`GO:0006855^biological_process^drug transm…	GO:0016020^cellular_component^membrane`GO:0005524^molecular_function^ATP binding`GO:0016887^molecular_function^ATPase activity	.	.
TRINITY_DN106664_c0_g1	TRINITY_DN106664_c0_g1_i1	.	.	.	.	.	.	.	.	.	.	.	.	.	.
TRINITY_DN106677_c0_g1	TRINITY_DN106677_c0_g1_i1	Y1754_ARATH^Y1754_ARATH^Q:269-583,H:10-114^68.571%ID^E:3.96e-38^RecName: Full=Acetyltransferase At1g77540;^Eukaryota; Viridiplantae; Streptophyta; Embryophyta; Tracheophyta; Spermatophyta; Magnoliophyta; eudicotyledons; Gunneridae; Pentapetalae; rosids; malvids; Brassicales; Brassicaceae; Camelineae; Arabidopsis	.	TRINITY_DN106677_c0_g1_i1|m.353	634-131[-]	.	.	.	.	.	.	.	.	.	.
TRINITY_DN106677_c0_g1	TRINITY_DN106677_c0_g1_i1	Y1754_ARATH^Y1754_ARATH^Q:269-583,H:10-114^68.571%ID^E:3.96e-38^RecName: Full=Acetyltransferase At1g77540;^Eukaryota; Viridiplantae; Streptophyta; Embryophyta; Tracheophyta; Spermatophyta; Magnoliophyta; eudicotyledons; Gunneridae; Pentapetalae; rosids; malvids; Brassicales; Brassicaceae; Camelineae; Arabidopsis	.	TRINITY_DN106677_c0_g1_i1|m.354	3-383[+]	.	.	.	.	.	.	.	.	.	.
TRINITY_DN106677_c0_g1	TRINITY_DN106677_c0_g1_i1	Y1754_ARATH^Y1754_ARATH^Q:269-583,H:10-114^68.571%ID^E:3.96e-38^RecName: Full=Acetyltransferase At1g77540;^Eukaryota; Viridiplantae; Streptophyta; Embryophyta; Tracheophyta; Spermatophyta; Magnoliophyta; eudicotyledons; Gunneridae; Pentapetalae; rosids; malvids; Brassicales; Brassicaceae; Camelineae; Arabidopsis	.	TRINITY_DN106677_c0_g1_i1|m.355	266-601[+]	Y1754_ARATH^Y1754_ARATH^Q:2-106,H:10-114^68.571%ID^E:2.04e-41^RecName: Full=Acetyltransferase At1g77540;^Eukaryota; Viridiplantae; Streptophyta; Embryophyta; Tracheophyta; Spermatophyta; Magnoliophyta; eudicotyledons; Gunneridae; Pentapetalae; rosids; malvids; Brassicales; Brassicaceae; Camelineae; Arabidopsis	PF14542.5^Acetyltransf_CG^GCN5-related N-acetyl-transferase^19-95^E:1.5e-20	.	.	ENOG41124TU^NA	KEGG:ath:AT1G77540	GO:0005777^cellular_component^peroxisome`GO:0004402^molecular_function^histone acetyltransferase activity	.	.	.
TRINITY_DN106677_c0_g1	TRINITY_DN106677_c0_g1_i1	Y1754_ARATH^Y1754_ARATH^Q:269-583,H:10-114^68.571%ID^E:3.96e-38^RecName: Full=Acetyltransferase At1g77540;^Eukaryota; Viridiplantae; Streptophyta; Embryophyta; Tracheophyta; Spermatophyta; Magnoliophyta; eudicotyledons; Gunneridae; Pentapetalae; rosids; malvids; Brassicales; Brassicaceae; Camelineae; Arabidopsis	.	TRINITY_DN106677_c0_g1_i1|m.356	899-588[-]	.	.	sigP:1^18^0.653^YES	.	.	.	.	.	.	.
TRINITY_DN106670_c0_g1	TRINITY_DN106670_c0_g1_i1	.	.	.	.	.	.	.	.	.	.	.	.	.	.
TRINITY_DN106633_c0_g1	TRINITY_DN106633_c0_g1_i1	.	.	.	.	.	.	.	.	.	.	.	.	.	.
TRINITY_DN106651_c0_g1	TRINITY_DN106651_c0_g1_i1	CRWN4_ARATH^CRWN4_ARATH^Q:349-555,H:573-641^63.768%ID^E:3.44e-35^RecName: Full=Protein CROWDED NUCLEI 4 {ECO:0000303|PubMed:24308514};^Eukaryota; Viridiplantae; Streptophyta; Embryophyta; Tracheophyta; Spermatophyta; Magnoliophyta; eudicotyledons; Gunneridae; Pentapetalae; rosids; malvids; Brassicales; Brassicaceae; Camelineae; Arabidopsis`CRWN4_ARATH^CRWN4_ARATH^Q:5-352,H:454-574^49.587%ID^E:3.4…	.	.	.	.	.	.	.	ENOG410YA8H^nuclear matrix constituent protein 1-like	KEGG:ath:AT5G65770`KO:K00826	GO:0009507^cellular_component^chloroplast`GO:0010369^cellular_component^chromocenter`GO:0005737^cellular_component^cytoplasm`GO:0005652^cellular_component^nuclear lamina`GO:0031965^cellular_component^nuclear membrane`GO:0034399^cellular_component^nuclear periphery`GO:0005654^cellular_component^nucleoplasm`GO:0006997^biological_process^nucleus organization`GO:0097298^biological_process^regulation …	.	.	.
TRINITY_DN106665_c0_g2	TRINITY_DN106665_c0_g2_i1	PP151_ARATH^PP151_ARATH^Q:395-2215,H:18-668^34.198%ID^E:4.46e-129^RecName: Full=Pentatricopeptide repeat-containing protein At2g13600;^Eukaryota; Viridiplantae; Streptophyta; Embryophyta; Tracheophyta; Spermatophyta; Magnoliophyta; eudicotyledons; Gunneridae; Pentapetalae; rosids; malvids; Brassicales; Brassicaceae; Camelineae; Arabidopsis`PP151_ARATH^PP151_ARATH^Q:230-1309,H:197-570^27.056%ID^E:…	.	TRINITY_DN106665_c0_g2_i1|m.357	101-2293[+]	PP151_ARATH^PP151_ARATH^Q:99-705,H:18-668^34.198%ID^E:2.45e-130^RecName: Full=Pentatricopeptide repeat-containing protein At2g13600;^Eukaryota; Viridiplantae; Streptophyta; Embryophyta; Tracheophyta; Spermatophyta; Magnoliophyta; eudicotyledons; Gunneridae; Pentapetalae; rosids; malvids; Brassicales; Brassicaceae; Camelineae; Arabidopsis`PP151_ARATH^PP151_ARATH^Q:44-403,H:197-570^27.056%ID^E:2.08…	PF01535.19^PPR^PPR repeat^37-63^E:0.048`PF13041.5^PPR_2^PPR repeat family^64-111^E:9.3e-09`PF01535.19^PPR^PPR repeat^66-94^E:2.5e-07`PF01535.19^PPR^PPR repeat^169-197^E:0.00017`PF01535.19^PPR^PPR repeat^333-357^E:0.00088`PF01535.19^PPR^PPR repeat^363-391^E:3.6e-06`PF13041.5^PPR_2^PPR repeat family^393-438^E:3.6e-10`PF01535.19^PPR^PPR repeat^395-423^E:4.7e-08`PF13041.5^PPR_2^PPR repeat family^493-…	.	.	ENOG410Z7Z7^Pentatricopeptide repeat-containing protein	KEGG:ath:AT2G13600	GO:0005739^cellular_component^mitochondrion`GO:0004519^molecular_function^endonuclease activity`GO:0003723^molecular_function^RNA binding`GO:0080156^biological_process^mitochondrial mRNA modification`GO:0010182^biological_process^sugar mediated signaling pathway	.	.	.
TRINITY_DN106616_c0_g1	TRINITY_DN106616_c0_g1_i1	BGAL3_ARATH^BGAL3_ARATH^Q:190-393,H:13-87^69.333%ID^E:1.13e-31^RecName: Full=Beta-galactosidase 3;^Eukaryota; Viridiplantae; Streptophyta; Embryophyta; Tracheophyta; Spermatophyta; Magnoliophyta; eudicotyledons; Gunneridae; Pentapetalae; rosids; malvids; Brassicales; Brassicaceae; Camelineae; Arabidopsis	.	.	.	.	.	.	.	COG1874^beta-galactosidase	KEGG:ath:AT4G36360	GO:0048046^cellular_component^apoplast`GO:0009505^cellular_component^plant-type cell wall`GO:0005773^cellular_component^vacuole`GO:0004565^molecular_function^beta-galactosidase activity`GO:0030246^molecular_function^carbohydrate binding`GO:0005975^biological_process^carbohydrate metabolic process	.	.	.
TRINITY_DN106649_c0_g1	TRINITY_DN106649_c0_g1_i1	.	.	TRINITY_DN106649_c0_g1_i1|m.358	284-610[+]	.	.	.	.	.	.	.	.	.	.
TRINITY_DN106649_c0_g1	TRINITY_DN106649_c0_g1_i1	.	.	TRINITY_DN106649_c0_g1_i1|m.359	1044-745[-]	.	.	.	.	.	.	.	.	.	.
TRINITY_DN106645_c0_g1	TRINITY_DN106645_c0_g1_i1	RL362_ARATH^RL362_ARATH^Q:91-420,H:1-112^78.571%ID^E:3.2e-52^RecName: Full=60S ribosomal protein L36-2;^Eukaryota; Viridiplantae; Streptophyta; Embryophyta; Tracheophyta; Spermatophyta; Magnoliophyta; eudicotyledons; Gunneridae; Pentapetalae; rosids; malvids; Brassicales; Brassicaceae; Camelineae; Arabidopsis	.	TRINITY_DN106645_c0_g1_i1|m.360	428-3[-]	.	.	.	.	.	.	.	.	.	.
TRINITY_DN106645_c0_g1	TRINITY_DN106645_c0_g1_i1	RL362_ARATH^RL362_ARATH^Q:91-420,H:1-112^78.571%ID^E:3.2e-52^RecName: Full=60S ribosomal protein L36-2;^Eukaryota; Viridiplantae; Streptophyta; Embryophyta; Tracheophyta; Spermatophyta; Magnoliophyta; eudicotyledons; Gunneridae; Pentapetalae; rosids; malvids; Brassicales; Brassicaceae; Camelineae; Arabidopsis	.	TRINITY_DN106645_c0_g1_i1|m.361	91-423[+]	RL362_ARATH^RL362_ARATH^Q:1-110,H:1-112^78.571%ID^E:4.28e-55^RecName: Full=60S ribosomal protein L36-2;^Eukaryota; Viridiplantae; Streptophyta; Embryophyta; Tracheophyta; Spermatophyta; Magnoliophyta; eudicotyledons; Gunneridae; Pentapetalae; rosids; malvids; Brassicales; Brassicaceae; Camelineae; Arabidopsis	PF01158.17^Ribosomal_L36e^Ribosomal protein L36e^8-101^E:1.2e-42	.	.	COG5051^60S ribosomal protein l36	KEGG:ath:AT3G53740`KO:K02920	GO:0005829^cellular_component^cytosol`GO:0022625^cellular_component^cytosolic large ribosomal subunit`GO:0022626^cellular_component^cytosolic ribosome`GO:0016020^cellular_component^membrane`GO:0005774^cellular_component^vacuolar membrane`GO:0003723^molecular_function^RNA binding`GO:0003735^molecular_function^structural constituent of ribosome`GO:0002181^biological_process^cytoplasmic translation`…	GO:0003735^molecular_function^structural constituent of ribosome`GO:0006412^biological_process^translation`GO:0005622^cellular_component^intracellular`GO:0005840^cellular_component^ribosome	.	.
TRINITY_DN106650_c0_g1	TRINITY_DN106650_c0_g1_i1	CCD11_ARATH^CCD11_ARATH^Q:175-477,H:13-111^69.307%ID^E:8.56e-35^RecName: Full=Cyclin-D1-1;^Eukaryota; Viridiplantae; Streptophyta; Embryophyta; Tracheophyta; Spermatophyta; Magnoliophyta; eudicotyledons; Gunneridae; Pentapetalae; rosids; malvids; Brassicales; Brassicaceae; Camelineae; Arabidopsis	.	TRINITY_DN106650_c0_g1_i1|m.362	145-477[+]	CCD11_ARATH^CCD11_ARATH^Q:11-111,H:13-111^69.307%ID^E:1.28e-35^RecName: Full=Cyclin-D1-1;^Eukaryota; Viridiplantae; Streptophyta; Embryophyta; Tracheophyta; Spermatophyta; Magnoliophyta; eudicotyledons; Gunneridae; Pentapetalae; rosids; malvids; Brassicales; Brassicaceae; Camelineae; Arabidopsis	PF00134.22^Cyclin_N^Cyclin, N-terminal domain^53-111^E:9e-07	.	.	ENOG410XRKC^(DC) complex that phosphorylates and inhibits members of the retinoblastoma (RB) protein family including RB1 and regulates the cell-cycle during G(1) S transition. Phosphorylation of RB1 allows dissociation of the transcription factor E2F from the RB E2F complex and the subsequent transcription of E2F target genes which are responsible for the progression through the G(1) phase. Hypo…	KEGG:ath:AT1G70210`KO:K18810	GO:0005634^cellular_component^nucleus`GO:0007049^biological_process^cell cycle`GO:0051301^biological_process^cell division	.	.	.
TRINITY_DN106650_c0_g1	TRINITY_DN106650_c0_g1_i1	CCD11_ARATH^CCD11_ARATH^Q:175-477,H:13-111^69.307%ID^E:8.56e-35^RecName: Full=Cyclin-D1-1;^Eukaryota; Viridiplantae; Streptophyta; Embryophyta; Tracheophyta; Spermatophyta; Magnoliophyta; eudicotyledons; Gunneridae; Pentapetalae; rosids; malvids; Brassicales; Brassicaceae; Camelineae; Arabidopsis	.	TRINITY_DN106650_c0_g1_i1|m.363	477-175[-]	.	.	.	.	.	.	.	.	.	.
TRINITY_DN106683_c0_g1	TRINITY_DN106683_c0_g1_i1	.	.	.	.	.	.	.	.	.	.	.	.	.	.
TRINITY_DN106638_c0_g1	TRINITY_DN106638_c0_g1_i1	.	.	.	.	.	.	.	.	.	.	.	.	.	.
TRINITY_DN106638_c1_g1	TRINITY_DN106638_c1_g1_i1	EL5_ORYSJ^EL5_ORYSJ^Q:26-184,H:134-176^50.943%ID^E:2.46e-10^RecName: Full=E3 ubiquitin-protein ligase EL5;^Eukaryota; Viridiplantae; Streptophyta; Embryophyta; Tracheophyta; Spermatophyta; Magnoliophyta; Liliopsida; Poales; Poaceae; BOP clade; Oryzoideae; Oryzeae; Oryzinae; Oryza; Oryza sativa	.	.	.	.	.	.	.	ENOG41121N2^zinc ion binding	KEGG:osa:107276747`KEGG:osa:107276748`KEGG:osa:107276749`KEGG:osa:107276750`KEGG:osa:107276751`KEGG:osa:4329685`KO:K16286	GO:0016021^cellular_component^integral component of membrane`GO:0005886^cellular_component^plasma membrane`GO:0046872^molecular_function^metal ion binding`GO:0061630^molecular_function^ubiquitin protein ligase activity`GO:0004842^molecular_function^ubiquitin-protein transferase activity`GO:0051301^biological_process^cell division`GO:0043161^biological_process^proteasome-mediated ubiquitin-depende…	.	.	.
TRINITY_DN106606_c0_g1	TRINITY_DN106606_c0_g1_i1	TBB7_ORYSJ^TBB7_ORYSJ^Q:17-397,H:1-127^89.764%ID^E:7.14e-82^RecName: Full=Tubulin beta-7 chain;^Eukaryota; Viridiplantae; Streptophyta; Embryophyta; Tracheophyta; Spermatophyta; Magnoliophyta; Liliopsida; Poales; Poaceae; BOP clade; Oryzoideae; Oryzeae; Oryzinae; Oryza; Oryza sativa	.	TRINITY_DN106606_c0_g1_i1|m.364	2-397[+]	TBB7_ORYSJ^TBB7_ORYSJ^Q:6-132,H:1-127^89.764%ID^E:6.42e-82^RecName: Full=Tubulin beta-7 chain;^Eukaryota; Viridiplantae; Streptophyta; Embryophyta; Tracheophyta; Spermatophyta; Magnoliophyta; Liliopsida; Poales; Poaceae; BOP clade; Oryzoideae; Oryzeae; Oryzinae; Oryza; Oryza sativa	PF00091.24^Tubulin^Tubulin/FtsZ family, GTPase domain^8-132^E:1.8e-33	.	.	COG5023^protein polymerization	KEGG:osa:4334309`KO:K07375	GO:0005737^cellular_component^cytoplasm`GO:0005874^cellular_component^microtubule`GO:0005525^molecular_function^GTP binding`GO:0003924^molecular_function^GTPase activity`GO:0005200^molecular_function^structural constituent of cytoskeleton`GO:0007017^biological_process^microtubule-based process	GO:0003924^molecular_function^GTPase activity	.	.
TRINITY_DN106674_c0_g1	TRINITY_DN106674_c0_g1_i1	WDR4_DANRE^WDR4_DANRE^Q:269-1009,H:52-280^32.016%ID^E:5.31e-21^RecName: Full=tRNA (guanine-N(7)-)-methyltransferase non-catalytic subunit wdr4 {ECO:0000255|HAMAP-Rule:MF_03056};^Eukaryota; Metazoa; Chordata; Craniata; Vertebrata; Euteleostomi; Actinopterygii; Neopterygii; Teleostei; Ostariophysi; Cypriniformes; Cyprinidae; Danio	.	TRINITY_DN106674_c0_g1_i1|m.365	113-1411[+]	WDR4_DANRE^WDR4_DANRE^Q:53-299,H:52-280^32.016%ID^E:1.11e-21^RecName: Full=tRNA (guanine-N(7)-)-methyltransferase non-catalytic subunit wdr4 {ECO:0000255|HAMAP-Rule:MF_03056};^Eukaryota; Metazoa; Chordata; Craniata; Vertebrata; Euteleostomi; Actinopterygii; Neopterygii; Teleostei; Ostariophysi; Cypriniformes; Cyprinidae; Danio	PF00400.31^WD40^WD domain, G-beta repeat^61-90^E:0.00019`PF00400.31^WD40^WD domain, G-beta repeat^151-180^E:0.00089`PF00400.31^WD40^WD domain, G-beta repeat^198-234^E:0.00089	.	.	ENOG4111WRP^Required for the formation of N(7)-methylguanine at position 46 (m7G46) in tRNA. In the complex, it is required to stabilize and induce conformational change of the catalytic subunit	.	GO:0005829^cellular_component^cytosol`GO:0005634^cellular_component^nucleus`GO:0043527^cellular_component^tRNA methyltransferase complex`GO:0106004^biological_process^tRNA (guanine-N7)-methylation`GO:0006400^biological_process^tRNA modification	GO:0005515^molecular_function^protein binding	.	.
TRINITY_DN119546_c0_g1	TRINITY_DN119546_c0_g1_i1	.	.	.	.	.	.	.	.	.	.	.	.	.	.
TRINITY_DN119592_c0_g1	TRINITY_DN119592_c0_g1_i1	PECT1_ARATH^PECT1_ARATH^Q:276-365,H:46-77^81.25%ID^E:3.26e-13^RecName: Full=Ethanolamine-phosphate cytidylyltransferase;^Eukaryota; Viridiplantae; Streptophyta; Embryophyta; Tracheophyta; Spermatophyta; Magnoliophyta; eudicotyledons; Gunneridae; Pentapetalae; rosids; malvids; Brassicales; Brassicaceae; Camelineae; Arabidopsis	.	.	.	.	.	.	.	COG0615^cytidylyltransferase	KEGG:ath:AT2G38670`KO:K00967	GO:0031307^cellular_component^integral component of mitochondrial outer membrane`GO:0005739^cellular_component^mitochondrion`GO:0004306^molecular_function^ethanolamine-phosphate cytidylyltransferase activity`GO:0006646^biological_process^phosphatidylethanolamine biosynthetic process	.	.	.
TRINITY_DN119506_c0_g1	TRINITY_DN119506_c0_g1_i1	.	.	.	.	.	.	.	.	.	.	.	.	.	.
TRINITY_DN119532_c0_g1	TRINITY_DN119532_c0_g1_i1	.	.	.	.	.	.	.	.	.	.	.	.	.	.
TRINITY_DN119521_c0_g1	TRINITY_DN119521_c0_g1_i1	.	.	.	.	.	.	.	.	.	.	.	.	.	.
TRINITY_DN119550_c0_g1	TRINITY_DN119550_c0_g1_i1	.	.	.	.	.	.	.	.	.	.	.	.	.	.
TRINITY_DN119578_c0_g1	TRINITY_DN119578_c0_g1_i1	.	.	.	.	.	.	.	.	.	.	.	.	.	.
TRINITY_DN119538_c0_g1	TRINITY_DN119538_c0_g1_i1	.	.	TRINITY_DN119538_c0_g1_i1|m.366	2-301[+]	.	.	.	.	.	.	.	.	.	.
TRINITY_DN119522_c0_g1	TRINITY_DN119522_c0_g1_i1	.	.	.	.	.	.	.	.	.	.	.	.	.	.
TRINITY_DN119507_c0_g1	TRINITY_DN119507_c0_g1_i1	.	.	.	.	.	.	.	.	.	.	.	.	.	.
TRINITY_DN119549_c0_g1	TRINITY_DN119549_c0_g1_i1	.	.	.	.	.	.	.	.	.	.	.	.	.	.
TRINITY_DN119560_c0_g1	TRINITY_DN119560_c0_g1_i1	.	.	.	.	.	.	.	.	.	.	.	.	.	.
TRINITY_DN119579_c0_g1	TRINITY_DN119579_c0_g1_i1	.	.	TRINITY_DN119579_c0_g1_i1|m.367	78-395[+]	.	.	sigP:1^21^0.763^YES	ExpAA=35.45^PredHel=1^Topology=o4-26i	.	.	.	.	.	.
TRINITY_DN119536_c0_g1	TRINITY_DN119536_c0_g1_i1	.	.	.	.	.	.	.	.	.	.	.	.	.	.
TRINITY_DN119545_c0_g2	TRINITY_DN119545_c0_g2_i1	.	.	.	.	.	.	.	.	.	.	.	.	.	.
TRINITY_DN119594_c0_g1	TRINITY_DN119594_c0_g1_i1	.	.	.	.	.	.	.	.	.	.	.	.	.	.
TRINITY_DN119552_c0_g1	TRINITY_DN119552_c0_g1_i1	YA7D_SCHPO^YA7D_SCHPO^Q:3-176,H:601-657^43.103%ID^E:7.39e-07^RecName: Full=Uncharacterized membrane protein C24H6.13;^Eukaryota; Fungi; Dikarya; Ascomycota; Taphrinomycotina; Schizosaccharomycetes; Schizosaccharomycetales; Schizosaccharomycetaceae; Schizosaccharomyces	.	TRINITY_DN119552_c0_g1_i1|m.368	3-353[+]	PHM7_YEAST^PHM7_YEAST^Q:1-94,H:610-696^34.043%ID^E:5.97e-09^RecName: Full=Phosphate metabolism protein 7;^Eukaryota; Fungi; Dikarya; Ascomycota; Saccharomycotina; Saccharomycetes; Saccharomycetales; Saccharomycetaceae; Saccharomyces	PF02714.14^RSN1_7TM^Calcium-dependent channel, 7TM region, putative phosphate^1-47^E:6.1e-12	.	ExpAA=44.93^PredHel=2^Topology=i21-43o58-80i	.	KEGG:sce:YOL084W`KO:K21989	GO:0016021^cellular_component^integral component of membrane`GO:0005886^cellular_component^plasma membrane`GO:0006811^biological_process^ion transport	GO:0016020^cellular_component^membrane	.	.
TRINITY_DN119551_c0_g1	TRINITY_DN119551_c0_g1_i1	.	.	.	.	.	.	.	.	.	.	.	.	.	.
TRINITY_DN119537_c0_g1	TRINITY_DN119537_c0_g1_i1	RSS3_ORYSJ^RSS3_ORYSJ^Q:34-324,H:323-412^43.564%ID^E:1.18e-15^RecName: Full=Protein RICE SALT SENSITIVE 3 {ECO:0000303|PubMed:23715469};^Eukaryota; Viridiplantae; Streptophyta; Embryophyta; Tracheophyta; Spermatophyta; Magnoliophyta; Liliopsida; Poales; Poaceae; BOP clade; Oryzoideae; Oryzeae; Oryzinae; Oryza; Oryza sativa	.	TRINITY_DN119537_c0_g1_i1|m.369	1-399[+]	RSS3_ORYSJ^RSS3_ORYSJ^Q:12-108,H:323-412^43.564%ID^E:1.06e-15^RecName: Full=Protein RICE SALT SENSITIVE 3 {ECO:0000303|PubMed:23715469};^Eukaryota; Viridiplantae; Streptophyta; Embryophyta; Tracheophyta; Spermatophyta; Magnoliophyta; Liliopsida; Poales; Poaceae; BOP clade; Oryzoideae; Oryzeae; Oryzinae; Oryza; Oryza sativa	.	.	.	ENOG410YAU9^NA	KEGG:osa:4350435	GO:0005737^cellular_component^cytoplasm`GO:0005634^cellular_component^nucleus`GO:0006355^biological_process^regulation of transcription, DNA-templated`GO:0006351^biological_process^transcription, DNA-templated	.	.	.
TRINITY_DN119518_c0_g1	TRINITY_DN119518_c0_g1_i1	.	.	.	.	.	.	.	.	.	.	.	.	.	.
TRINITY_DN119556_c0_g9	TRINITY_DN119556_c0_g9_i1	.	.	TRINITY_DN119556_c0_g9_i1|m.370	598-254[-]	.	.	.	ExpAA=41.62^PredHel=2^Topology=o20-42i63-80o	.	.	.	.	.	.
TRINITY_DN119535_c0_g1	TRINITY_DN119535_c0_g1_i1	.	.	.	.	.	.	.	.	.	.	.	.	.	.
TRINITY_DN119508_c0_g1	TRINITY_DN119508_c0_g1_i1	.	.	.	.	.	.	.	.	.	.	.	.	.	.
TRINITY_DN119516_c0_g1	TRINITY_DN119516_c0_g1_i1	.	.	.	.	.	.	.	.	.	.	.	.	.	.
TRINITY_DN119528_c0_g1	TRINITY_DN119528_c0_g1_i1	PYC_ASPTE^PYC_ASPTE^Q:14-334,H:363-469^89.72%ID^E:1.77e-51^RecName: Full=Pyruvate carboxylase;^Eukaryota; Fungi; Dikarya; Ascomycota; Pezizomycotina; Eurotiomycetes; Eurotiomycetidae; Eurotiales; Aspergillaceae; Aspergillus	.	TRINITY_DN119528_c0_g1_i1|m.371	2-334[+]	PYC_ASPNG^PYC_ASPNG^Q:5-111,H:362-468^89.72%ID^E:2.04e-62^RecName: Full=Pyruvate carboxylase;^Eukaryota; Fungi; Dikarya; Ascomycota; Pezizomycotina; Eurotiomycetes; Eurotiomycetidae; Eurotiales; Aspergillaceae; Aspergillus	PF02785.18^Biotin_carb_C^Biotin carboxylase C-terminal domain^24-111^E:6.2e-26	.	.	COG1038^Catalyzes a 2-step reaction, involving the ATP-dependent carboxylation of the covalently attached biotin in the first step and the transfer of the carboxyl group to pyruvate in the second (By similarity)	.	GO:0005737^cellular_component^cytoplasm`GO:0005524^molecular_function^ATP binding`GO:0009374^molecular_function^biotin binding`GO:0004075^molecular_function^biotin carboxylase activity`GO:0046872^molecular_function^metal ion binding`GO:0004736^molecular_function^pyruvate carboxylase activity`GO:0006094^biological_process^gluconeogenesis`GO:0006090^biological_process^pyruvate metabolic process	.	.	.
TRINITY_DN119528_c0_g1	TRINITY_DN119528_c0_g1_i1	PYC_ASPTE^PYC_ASPTE^Q:14-334,H:363-469^89.72%ID^E:1.77e-51^RecName: Full=Pyruvate carboxylase;^Eukaryota; Fungi; Dikarya; Ascomycota; Pezizomycotina; Eurotiomycetes; Eurotiomycetidae; Eurotiales; Aspergillaceae; Aspergillus	.	TRINITY_DN119528_c0_g1_i1|m.372	3-314[+]	.	.	.	.	.	.	.	.	.	.
TRINITY_DN119575_c0_g1	TRINITY_DN119575_c0_g1_i1	RH7_ARATH^RH7_ARATH^Q:2-133,H:571-614^54.545%ID^E:1.68e-06^RecName: Full=DEAD-box ATP-dependent RNA helicase 7;^Eukaryota; Viridiplantae; Streptophyta; Embryophyta; Tracheophyta; Spermatophyta; Magnoliophyta; eudicotyledons; Gunneridae; Pentapetalae; rosids; malvids; Brassicales; Brassicaceae; Camelineae; Arabidopsis	.	.	.	.	.	.	.	COG0513^purine NTP-dependent helicase activity	KEGG:ath:AT5G62190`KO:K16911	GO:0005737^cellular_component^cytoplasm`GO:0005730^cellular_component^nucleolus`GO:0005634^cellular_component^nucleus`GO:0005524^molecular_function^ATP binding`GO:0004004^molecular_function^ATP-dependent RNA helicase activity`GO:0017151^molecular_function^DEAD/H-box RNA helicase binding`GO:0003723^molecular_function^RNA binding`GO:0016070^biological_process^RNA metabolic process`GO:0010501^biolog…	.	.	.
TRINITY_DN119527_c0_g1	TRINITY_DN119527_c0_g1_i1	.	.	.	.	.	.	.	.	.	.	.	.	.	.
TRINITY_DN119583_c0_g1	TRINITY_DN119583_c0_g1_i1	.	.	.	.	.	.	.	.	.	.	.	.	.	.
TRINITY_DN119581_c0_g1	TRINITY_DN119581_c0_g1_i1	.	.	.	.	.	.	.	.	.	.	.	.	.	.
TRINITY_DN119590_c0_g1	TRINITY_DN119590_c0_g1_i1	.	.	.	.	.	.	.	.	.	.	.	.	.	.
TRINITY_DN119511_c0_g1	TRINITY_DN119511_c0_g1_i1	.	.	.	.	.	.	.	.	.	.	.	.	.	.
TRINITY_DN119514_c0_g1	TRINITY_DN119514_c0_g1_i1	.	.	.	.	.	.	.	.	.	.	.	.	.	.
TRINITY_DN119571_c0_g1	TRINITY_DN119571_c0_g1_i1	NOP56_YEAST^NOP56_YEAST^Q:13-315,H:1-102^60.784%ID^E:6.62e-34^RecName: Full=Nucleolar protein 56;^Eukaryota; Fungi; Dikarya; Ascomycota; Saccharomycotina; Saccharomycetes; Saccharomycetales; Saccharomycetaceae; Saccharomyces	.	TRINITY_DN119571_c0_g1_i1|m.373	1-315[+]	NOP56_YEAST^NOP56_YEAST^Q:5-105,H:1-102^60.784%ID^E:5.96e-34^RecName: Full=Nucleolar protein 56;^Eukaryota; Fungi; Dikarya; Ascomycota; Saccharomycotina; Saccharomycetes; Saccharomycetales; Saccharomycetaceae; Saccharomyces	PF08156.12^NOP5NT^NOP5NT (NUC127) domain^10-76^E:4.1e-21	.	.	.	KEGG:sce:YLR197W`KO:K14564	GO:0031428^cellular_component^box C/D snoRNP complex`GO:0005730^cellular_component^nucleolus`GO:0005654^cellular_component^nucleoplasm`GO:0032040^cellular_component^small-subunit processome`GO:0030515^molecular_function^snoRNA binding`GO:0000451^biological_process^rRNA 2'-O-methylation`GO:0031167^biological_process^rRNA methylation`GO:0000154^biological_process^rRNA modification`GO:0006364^biolog…	.	.	.
TRINITY_DN119571_c0_g1	TRINITY_DN119571_c0_g1_i1	NOP56_YEAST^NOP56_YEAST^Q:13-315,H:1-102^60.784%ID^E:6.62e-34^RecName: Full=Nucleolar protein 56;^Eukaryota; Fungi; Dikarya; Ascomycota; Saccharomycotina; Saccharomycetes; Saccharomycetales; Saccharomycetaceae; Saccharomyces	.	TRINITY_DN119571_c0_g1_i1|m.374	315-1[-]	.	.	sigP:1^20^0.633^YES	.	.	.	.	.	.	.
TRINITY_DN119571_c0_g1	TRINITY_DN119571_c0_g1_i1	NOP56_YEAST^NOP56_YEAST^Q:13-315,H:1-102^60.784%ID^E:6.62e-34^RecName: Full=Nucleolar protein 56;^Eukaryota; Fungi; Dikarya; Ascomycota; Saccharomycotina; Saccharomycetes; Saccharomycetales; Saccharomycetaceae; Saccharomyces	.	TRINITY_DN119571_c0_g1_i1|m.375	3-314[+]	.	.	.	.	.	.	.	.	.	.
TRINITY_DN119580_c0_g1	TRINITY_DN119580_c0_g1_i1	CCMFC_ARATH^CCMFC_ARATH^Q:348-1,H:254-369^88.793%ID^E:5.38e-70^RecName: Full=Cytochrome c biogenesis CcmF C-terminal-like mitochondrial protein {ECO:0000305};^Eukaryota; Viridiplantae; Streptophyta; Embryophyta; Tracheophyta; Spermatophyta; Magnoliophyta; eudicotyledons; Gunneridae; Pentapetalae; rosids; malvids; Brassicales; Brassicaceae; Camelineae; Arabidopsis	.	TRINITY_DN119580_c0_g1_i1|m.376	348-1[-]	CCMFC_ARATH^CCMFC_ARATH^Q:1-116,H:254-369^88.793%ID^E:4.46e-70^RecName: Full=Cytochrome c biogenesis CcmF C-terminal-like mitochondrial protein {ECO:0000305};^Eukaryota; Viridiplantae; Streptophyta; Embryophyta; Tracheophyta; Spermatophyta; Magnoliophyta; eudicotyledons; Gunneridae; Pentapetalae; rosids; malvids; Brassicales; Brassicaceae; Camelineae; Arabidopsis	.	.	.	ENOG410YDS3^cytochrome c biogenesis	KEGG:ath:ArthMp017	GO:0016021^cellular_component^integral component of membrane`GO:0005743^cellular_component^mitochondrial inner membrane`GO:0017004^biological_process^cytochrome complex assembly`GO:0006810^biological_process^transport	.	.	.
TRINITY_DN119524_c0_g1	TRINITY_DN119524_c0_g1_i1	.	.	.	.	.	.	.	.	.	.	.	.	.	.
TRINITY_DN119596_c0_g1	TRINITY_DN119596_c0_g1_i1	YM39_YEAST^YM39_YEAST^Q:120-260,H:313-359^55.319%ID^E:9.25e-11^RecName: Full=Uncharacterized mitochondrial carrier YMR166C;^Eukaryota; Fungi; Dikarya; Ascomycota; Saccharomycotina; Saccharomycetes; Saccharomycetales; Saccharomycetaceae; Saccharomyces	.	TRINITY_DN119596_c0_g1_i1|m.377	3-323[+]	YM39_YEAST^YM39_YEAST^Q:40-86,H:313-359^55.319%ID^E:5.08e-11^RecName: Full=Uncharacterized mitochondrial carrier YMR166C;^Eukaryota; Fungi; Dikarya; Ascomycota; Saccharomycotina; Saccharomycetes; Saccharomycetales; Saccharomycetaceae; Saccharomyces	PF00153.26^Mito_carr^Mitochondrial carrier protein^34-89^E:9.1e-11	.	.	.	KEGG:sce:YMR166C	GO:0016021^cellular_component^integral component of membrane`GO:0005743^cellular_component^mitochondrial inner membrane`GO:0015095^molecular_function^magnesium ion transmembrane transporter activity`GO:1990616^biological_process^magnesium ion export from mitochondrion`GO:0015693^biological_process^magnesium ion transport	.	.	.
TRINITY_DN119529_c0_g1	TRINITY_DN119529_c0_g1_i1	.	.	.	.	.	.	.	.	.	.	.	.	.	.
TRINITY_DN119540_c0_g1	TRINITY_DN119540_c0_g1_i1	KMS1_ARATH^KMS1_ARATH^Q:339-434,H:263-294^78.125%ID^E:8.55e-10^RecName: Full=Vacuole membrane protein KMS1 {ECO:0000303|PubMed:21294794};^Eukaryota; Viridiplantae; Streptophyta; Embryophyta; Tracheophyta; Spermatophyta; Magnoliophyta; eudicotyledons; Gunneridae; Pentapetalae; rosids; malvids; Brassicales; Brassicaceae; Camelineae; Arabidopsis	.	.	.	.	.	.	.	ENOG410XQHA^vacuole membrane protein	KEGG:ath:AT4G14950`KO:K21248	GO:0005783^cellular_component^endoplasmic reticulum`GO:0005789^cellular_component^endoplasmic reticulum membrane`GO:0016021^cellular_component^integral component of membrane`GO:0000407^cellular_component^pre-autophagosomal structure`GO:0010256^biological_process^endomembrane system organization`GO:0007029^biological_process^endoplasmic reticulum organization`GO:0006887^biological_process^exocytos…	.	.	.
TRINITY_DN119519_c0_g1	TRINITY_DN119519_c0_g1_i1	.	.	.	.	.	.	.	.	.	.	.	.	.	.
TRINITY_DN119541_c0_g1	TRINITY_DN119541_c0_g1_i1	.	.	.	.	.	.	.	.	.	.	.	.	.	.
TRINITY_DN119501_c0_g1	TRINITY_DN119501_c0_g1_i1	SAT5_ARATH^SAT5_ARATH^Q:231-359,H:134-176^58.14%ID^E:1.27e-09^RecName: Full=Serine acetyltransferase 5;^Eukaryota; Viridiplantae; Streptophyta; Embryophyta; Tracheophyta; Spermatophyta; Magnoliophyta; eudicotyledons; Gunneridae; Pentapetalae; rosids; malvids; Brassicales; Brassicaceae; Camelineae; Arabidopsis	.	.	.	.	.	.	.	COG1045^serine acetyltransferase	KEGG:ath:AT5G56760`KO:K00640	GO:0005829^cellular_component^cytosol`GO:0009001^molecular_function^serine O-acetyltransferase activity`GO:0019344^biological_process^cysteine biosynthetic process`GO:0006535^biological_process^cysteine biosynthetic process from serine	.	.	.
TRINITY_DN119569_c0_g1	TRINITY_DN119569_c0_g1_i1	.	.	.	.	.	.	.	.	.	.	.	.	.	.
TRINITY_DN119563_c0_g1	TRINITY_DN119563_c0_g1_i1	.	.	.	.	.	.	.	.	.	.	.	.	.	.
TRINITY_DN119523_c0_g1	TRINITY_DN119523_c0_g1_i1	.	.	.	.	.	.	.	.	.	.	.	.	.	.
TRINITY_DN119510_c0_g1	TRINITY_DN119510_c0_g1_i1	.	.	.	.	.	.	.	.	.	.	.	.	.	.
TRINITY_DN119600_c0_g1	TRINITY_DN119600_c0_g1_i1	ECA4_ARATH^ECA4_ARATH^Q:2-85,H:765-792^92.857%ID^E:7.49e-10^RecName: Full=Calcium-transporting ATPase 4, endoplasmic reticulum-type;^Eukaryota; Viridiplantae; Streptophyta; Embryophyta; Tracheophyta; Spermatophyta; Magnoliophyta; eudicotyledons; Gunneridae; Pentapetalae; rosids; malvids; Brassicales; Brassicaceae; Camelineae; Arabidopsis	.	.	.	.	.	.	.	COG0474^P-type atpase	KEGG:ath:AT1G07670`KO:K01537	GO:0005783^cellular_component^endoplasmic reticulum`GO:0016021^cellular_component^integral component of membrane`GO:0005886^cellular_component^plasma membrane`GO:0005524^molecular_function^ATP binding`GO:0005388^molecular_function^calcium-transporting ATPase activity`GO:0046872^molecular_function^metal ion binding	.	.	.
TRINITY_DN119567_c0_g1	TRINITY_DN119567_c0_g1_i1	PLST1_ARATH^PLST1_ARATH^Q:265-387,H:352-394^53.488%ID^E:4.62e-06^RecName: Full=Probable plastidic glucose transporter 1;^Eukaryota; Viridiplantae; Streptophyta; Embryophyta; Tracheophyta; Spermatophyta; Magnoliophyta; eudicotyledons; Gunneridae; Pentapetalae; rosids; malvids; Brassicales; Brassicaceae; Camelineae; Arabidopsis	.	.	.	.	.	.	.	ENOG410XNQK^Transporter	KEGG:ath:AT1G05030	GO:0031969^cellular_component^chloroplast membrane`GO:0016021^cellular_component^integral component of membrane`GO:0022891^molecular_function^substrate-specific transmembrane transporter activity`GO:0008643^biological_process^carbohydrate transport	.	.	.
TRINITY_DN119512_c0_g1	TRINITY_DN119512_c0_g1_i1	.	.	.	.	.	.	.	.	.	.	.	.	.	.
TRINITY_DN119547_c0_g1	TRINITY_DN119547_c0_g1_i1	.	.	.	.	.	.	.	.	.	.	.	.	.	.
TRINITY_DN119576_c0_g1	TRINITY_DN119576_c0_g1_i1	CAF1M_ARATH^CAF1M_ARATH^Q:297-362,H:347-368^90.909%ID^E:2.78e-07^RecName: Full=CRS2-associated factor 1, mitochondrial;^Eukaryota; Viridiplantae; Streptophyta; Embryophyta; Tracheophyta; Spermatophyta; Magnoliophyta; eudicotyledons; Gunneridae; Pentapetalae; rosids; malvids; Brassicales; Brassicaceae; Camelineae; Arabidopsis	.	.	.	.	.	.	.	ENOG410XQZ0^CRS2-associated factor	KEGG:ath:AT4G31010	GO:0030529^cellular_component^intracellular ribonucleoprotein complex`GO:0005739^cellular_component^mitochondrion`GO:0003723^molecular_function^RNA binding`GO:0009793^biological_process^embryo development ending in seed dormancy`GO:0000373^biological_process^Group II intron splicing`GO:0097031^biological_process^mitochondrial respiratory chain complex I biogenesis`GO:0097034^biological_process^mi…	.	.	.
TRINITY_DN119586_c0_g2	TRINITY_DN119586_c0_g2_i1	EIF3E_ARATH^EIF3E_ARATH^Q:3-107,H:290-324^74.286%ID^E:2.87e-09^RecName: Full=Eukaryotic translation initiation factor 3 subunit E {ECO:0000255|HAMAP-Rule:MF_03004, ECO:0000303|PubMed:11029466};^Eukaryota; Viridiplantae; Streptophyta; Embryophyta; Tracheophyta; Spermatophyta; Magnoliophyta; eudicotyledons; Gunneridae; Pentapetalae; rosids; malvids; Brassicales; Brassicaceae; Camelineae; Arabidopsi…	.	TRINITY_DN119586_c0_g2_i1|m.378	3-305[+]	EIF3E_ARATH^EIF3E_ARATH^Q:1-35,H:290-324^74.286%ID^E:1.04e-09^RecName: Full=Eukaryotic translation initiation factor 3 subunit E {ECO:0000255|HAMAP-Rule:MF_03004, ECO:0000303|PubMed:11029466};^Eukaryota; Viridiplantae; Streptophyta; Embryophyta; Tracheophyta; Spermatophyta; Magnoliophyta; eudicotyledons; Gunneridae; Pentapetalae; rosids; malvids; Brassicales; Brassicaceae; Camelineae; Arabidopsis	.	.	.	ENOG410XQK5^Component of the eukaryotic translation initiation factor 3 (eIF-3) complex, which is involved in protein synthesis and, together with other initiation factors, stimulates binding of mRNA and methionyl-tRNAi to the 40S ribosome (By similarity)	KEGG:ath:AT3G57290`KO:K03250	GO:0005737^cellular_component^cytoplasm`GO:0005829^cellular_component^cytosol`GO:0031597^cellular_component^cytosolic proteasome complex`GO:0005852^cellular_component^eukaryotic translation initiation factor 3 complex`GO:0005634^cellular_component^nucleus`GO:0005886^cellular_component^plasma membrane`GO:0003729^molecular_function^mRNA binding`GO:0003743^molecular_function^translation initiation f…	.	.	.
TRINITY_DN119587_c0_g1	TRINITY_DN119587_c0_g1_i1	.	.	.	.	.	.	.	.	.	.	.	.	.	.
TRINITY_DN103738_c0_g1	TRINITY_DN103738_c0_g1_i1	P2A10_ARATH^P2A10_ARATH^Q:351-626,H:1-92^46.739%ID^E:1.21e-13^RecName: Full=Protein PHLOEM PROTEIN 2-LIKE A10;^Eukaryota; Viridiplantae; Streptophyta; Embryophyta; Tracheophyta; Spermatophyta; Magnoliophyta; eudicotyledons; Gunneridae; Pentapetalae; rosids; malvids; Brassicales; Brassicaceae; Camelineae; Arabidopsis	.	.	.	.	.	.	.	ENOG4111YI2^Protein PHLOEM PROTEIN 2-LIKE	KEGG:ath:AT1G10150	GO:0016021^cellular_component^integral component of membrane`GO:0030246^molecular_function^carbohydrate binding	.	.	.
TRINITY_DN103742_c0_g1	TRINITY_DN103742_c0_g1_i1	.	.	.	.	.	.	.	.	.	.	.	.	.	.
TRINITY_DN103775_c0_g1	TRINITY_DN103775_c0_g1_i1	.	.	.	.	.	.	.	.	.	.	.	.	.	.
TRINITY_DN103737_c0_g1	TRINITY_DN103737_c0_g1_i1	.	.	TRINITY_DN103737_c0_g1_i1|m.379	119-745[+]	.	PF03909.16^BSD^BSD domain^164-208^E:0.00017	.	.	.	.	.	.	.	.
TRINITY_DN103763_c0_g1	TRINITY_DN103763_c0_g1_i1	ICE1_ARATH^ICE1_ARATH^Q:203-301,H:329-361^78.788%ID^E:6.02e-10^RecName: Full=Transcription factor ICE1;^Eukaryota; Viridiplantae; Streptophyta; Embryophyta; Tracheophyta; Spermatophyta; Magnoliophyta; eudicotyledons; Gunneridae; Pentapetalae; rosids; malvids; Brassicales; Brassicaceae; Camelineae; Arabidopsis	.	.	.	.	.	.	.	ENOG4111GT2^inducer of cbf expression	KEGG:ath:AT3G26744	GO:0005634^cellular_component^nucleus`GO:0003677^molecular_function^DNA binding`GO:0046983^molecular_function^protein dimerization activity`GO:0003700^molecular_function^DNA binding transcription factor activity`GO:0045893^biological_process^positive regulation of transcription, DNA-templated`GO:0009409^biological_process^response to cold`GO:0050826^biological_process^response to freezing`GO:0010…	.	.	.
TRINITY_DN103780_c0_g1	TRINITY_DN103780_c0_g1_i1	.	.	.	.	.	.	.	.	.	.	.	.	.	.
TRINITY_DN103780_c0_g2	TRINITY_DN103780_c0_g2_i1	BTF3L_ARATH^BTF3L_ARATH^Q:222-302,H:92-118^88.889%ID^E:7.53e-08^RecName: Full=Nascent polypeptide-associated complex subunit beta {ECO:0000255|RuleBase:RU361272};^Eukaryota; Viridiplantae; Streptophyta; Embryophyta; Tracheophyta; Spermatophyta; Magnoliophyta; eudicotyledons; Gunneridae; Pentapetalae; rosids; malvids; Brassicales; Brassicaceae; Camelineae; Arabidopsis	.	.	.	.	.	.	.	ENOG4111JBG^Component of the nascent polypeptide-associated complex (NAC), a dynamic component of the ribosomal exit tunnel, protecting the emerging polypeptides from interaction with other cytoplasmic proteins to ensure appropriate nascent protein targeting (By similarity). The NAC complex also promotes mitochondrial protein import by enhancing productive ribosome interactions with the outer mit…	KEGG:ath:AT1G73230`KO:K01527	GO:0006355^biological_process^regulation of transcription, DNA-templated`GO:0009651^biological_process^response to salt stress`GO:0006351^biological_process^transcription, DNA-templated	.	.	.
TRINITY_DN103794_c0_g1	TRINITY_DN103794_c0_g1_i1	.	.	.	.	.	.	.	.	.	.	.	.	.	.
TRINITY_DN103751_c0_g1	TRINITY_DN103751_c0_g1_i1	.	.	.	.	.	.	.	.	.	.	.	.	.	.
TRINITY_DN103789_c0_g6	TRINITY_DN103789_c0_g6_i1	.	.	.	.	.	.	.	.	.	.	.	.	.	.
TRINITY_DN103727_c0_g1	TRINITY_DN103727_c0_g1_i1	.	.	.	.	.	.	.	.	.	.	.	.	.	.
TRINITY_DN103798_c0_g1	TRINITY_DN103798_c0_g1_i1	.	.	.	.	.	.	.	.	.	.	.	.	.	.
TRINITY_DN103781_c0_g1	TRINITY_DN103781_c0_g1_i1	.	.	.	.	.	.	.	.	.	.	.	.	.	.
TRINITY_DN103707_c0_g1	TRINITY_DN103707_c0_g1_i1	.	.	.	.	.	.	.	.	.	.	.	.	.	.
TRINITY_DN103730_c0_g1	TRINITY_DN103730_c0_g1_i1	MCA1_ARATH^MCA1_ARATH^Q:333-1,H:186-253^54.054%ID^E:2.16e-33^RecName: Full=Metacaspase-1;^Eukaryota; Viridiplantae; Streptophyta; Embryophyta; Tracheophyta; Spermatophyta; Magnoliophyta; eudicotyledons; Gunneridae; Pentapetalae; rosids; malvids; Brassicales; Brassicaceae; Camelineae; Arabidopsis	.	.	.	.	.	.	.	ENOG410Y41C^Metacaspase	KEGG:ath:AT1G02170	GO:0004197^molecular_function^cysteine-type endopeptidase activity`GO:0006952^biological_process^defense response`GO:0043068^biological_process^positive regulation of programmed cell death	.	.	.
TRINITY_DN103708_c0_g1	TRINITY_DN103708_c0_g1_i1	.	.	.	.	.	.	.	.	.	.	.	.	.	.
TRINITY_DN103721_c0_g1	TRINITY_DN103721_c0_g1_i1	.	.	.	.	.	.	.	.	.	.	.	.	.	.
TRINITY_DN103744_c0_g1	TRINITY_DN103744_c0_g1_i1	.	.	.	.	.	.	.	.	.	.	.	.	.	.
TRINITY_DN103717_c0_g1	TRINITY_DN103717_c0_g1_i1	GRP78_NEUCR^GRP78_NEUCR^Q:3-320,H:519-624^81.132%ID^E:4.57e-38^RecName: Full=78 kDa glucose-regulated protein homolog;^Eukaryota; Fungi; Dikarya; Ascomycota; Pezizomycotina; Sordariomycetes; Sordariomycetidae; Sordariales; Sordariaceae; Neurospora	.	TRINITY_DN103717_c0_g1_i1|m.380	320-3[-]	DHE2_ACHKL^DHE2_ACHKL^Q:8-105,H:457-553^37.755%ID^E:2.22e-07^RecName: Full=NAD-specific glutamate dehydrogenase;^Eukaryota; Stramenopiles; Oomycetes; Saprolegniales; Saprolegniaceae; Achlya	PF10712.8^NAD-GH^NAD-specific glutamate dehydrogenase^31-105^E:3.3e-08	.	.	.	.	GO:0004352^molecular_function^glutamate dehydrogenase (NAD+) activity	.	.	.
TRINITY_DN103717_c0_g1	TRINITY_DN103717_c0_g1_i1	GRP78_NEUCR^GRP78_NEUCR^Q:3-320,H:519-624^81.132%ID^E:4.57e-38^RecName: Full=78 kDa glucose-regulated protein homolog;^Eukaryota; Fungi; Dikarya; Ascomycota; Pezizomycotina; Sordariomycetes; Sordariomycetidae; Sordariales; Sordariaceae; Neurospora	.	TRINITY_DN103717_c0_g1_i1|m.381	3-320[+]	GRP78_NEUCR^GRP78_NEUCR^Q:1-106,H:519-624^81.132%ID^E:1.84e-52^RecName: Full=78 kDa glucose-regulated protein homolog;^Eukaryota; Fungi; Dikarya; Ascomycota; Pezizomycotina; Sordariomycetes; Sordariomycetidae; Sordariales; Sordariaceae; Neurospora	PF00012.19^HSP70^Hsp70 protein^2-103^E:1e-18	.	.	.	KEGG:ncr:NCU03982`KO:K09490	GO:0005788^cellular_component^endoplasmic reticulum lumen`GO:0005524^molecular_function^ATP binding	.	.	.
TRINITY_DN103797_c0_g1	TRINITY_DN103797_c0_g1_i1	.	.	.	.	.	.	.	.	.	.	.	.	.	.
TRINITY_DN103770_c0_g1	TRINITY_DN103770_c0_g1_i1	SIS3_ARATH^SIS3_ARATH^Q:374-466,H:242-272^80.645%ID^E:6.04e-10^RecName: Full=E3 ubiquitin-protein ligase SIS3;^Eukaryota; Viridiplantae; Streptophyta; Embryophyta; Tracheophyta; Spermatophyta; Magnoliophyta; eudicotyledons; Gunneridae; Pentapetalae; rosids; malvids; Brassicales; Brassicaceae; Camelineae; Arabidopsis	.	.	.	.	.	.	.	ENOG41121N2^zinc ion binding	KEGG:ath:AT3G47990`KO:K16284	GO:0016021^cellular_component^integral component of membrane`GO:0046872^molecular_function^metal ion binding`GO:0061630^molecular_function^ubiquitin protein ligase activity`GO:0004842^molecular_function^ubiquitin-protein transferase activity`GO:0043161^biological_process^proteasome-mediated ubiquitin-dependent protein catabolic process`GO:0016567^biological_process^protein ubiquitination`GO:00101…	.	.	.
TRINITY_DN103790_c0_g1	TRINITY_DN103790_c0_g1_i1	.	.	.	.	.	.	.	.	.	.	.	.	.	.
TRINITY_DN103711_c0_g1	TRINITY_DN103711_c0_g1_i1	SUSY_VIGRR^SUSY_VIGRR^Q:262-408,H:1-49^73.469%ID^E:1.15e-14^RecName: Full=Sucrose synthase;^Eukaryota; Viridiplantae; Streptophyta; Embryophyta; Tracheophyta; Spermatophyta; Magnoliophyta; eudicotyledons; Gunneridae; Pentapetalae; rosids; fabids; Fabales; Fabaceae; Papilionoideae; Phaseoleae; Vigna	.	.	.	.	.	.	.	.	.	GO:0016157^molecular_function^sucrose synthase activity`GO:0005985^biological_process^sucrose metabolic process	.	.	.
TRINITY_DN103769_c0_g1	TRINITY_DN103769_c0_g1_i1	.	.	.	.	.	.	.	.	.	.	.	.	.	.
TRINITY_DN103741_c0_g1	TRINITY_DN103741_c0_g1_i1	.	.	.	.	.	.	.	.	.	.	.	.	.	.
TRINITY_DN103779_c0_g1	TRINITY_DN103779_c0_g1_i1	.	.	.	.	.	.	.	.	.	.	.	.	.	.
TRINITY_DN103795_c0_g1	TRINITY_DN103795_c0_g1_i1	.	.	.	.	.	.	.	.	.	.	.	.	.	.
TRINITY_DN103702_c0_g1	TRINITY_DN103702_c0_g1_i1	PCS1_WHEAT^PCS1_WHEAT^Q:218-358,H:6-53^54.167%ID^E:1.32e-08^RecName: Full=Glutathione gamma-glutamylcysteinyltransferase 1;^Eukaryota; Viridiplantae; Streptophyta; Embryophyta; Tracheophyta; Spermatophyta; Magnoliophyta; Liliopsida; Poales; Poaceae; BOP clade; Pooideae; Triticodae; Triticeae; Triticinae; Triticum	.	TRINITY_DN103702_c0_g1_i1|m.382	2-364[+]	PCS1_WHEAT^PCS1_WHEAT^Q:73-119,H:6-53^54.167%ID^E:1.19e-08^RecName: Full=Glutathione gamma-glutamylcysteinyltransferase 1;^Eukaryota; Viridiplantae; Streptophyta; Embryophyta; Tracheophyta; Spermatophyta; Magnoliophyta; Liliopsida; Poales; Poaceae; BOP clade; Pooideae; Triticodae; Triticeae; Triticinae; Triticum	PF05023.13^Phytochelatin^Phytochelatin synthase^73-119^E:4e-06	.	.	.	.	GO:0016756^molecular_function^glutathione gamma-glutamylcysteinyltransferase activity`GO:0046872^molecular_function^metal ion binding`GO:0046938^biological_process^phytochelatin biosynthetic process`GO:0010038^biological_process^response to metal ion	GO:0016756^molecular_function^glutathione gamma-glutamylcysteinyltransferase activity`GO:0046872^molecular_function^metal ion binding`GO:0010038^biological_process^response to metal ion`GO:0046938^biological_process^phytochelatin biosynthetic process	.	.
TRINITY_DN103735_c0_g1	TRINITY_DN103735_c0_g1_i1	.	.	TRINITY_DN103735_c0_g1_i1|m.383	264-581[+]	.	.	.	ExpAA=43.31^PredHel=2^Topology=o11-33i46-68o	.	.	.	.	.	.
TRINITY_DN103756_c0_g1	TRINITY_DN103756_c0_g1_i1	.	.	TRINITY_DN103756_c0_g1_i1|m.384	109-405[+]	.	.	.	.	.	.	.	.	.	.
TRINITY_DN103703_c0_g1	TRINITY_DN103703_c0_g1_i1	.	.	.	.	.	.	.	.	.	.	.	.	.	.
TRINITY_DN103725_c0_g2	TRINITY_DN103725_c0_g2_i1	.	.	.	.	.	.	.	.	.	.	.	.	.	.
TRINITY_DN103766_c0_g1	TRINITY_DN103766_c0_g1_i1	.	.	.	.	.	.	.	.	.	.	.	.	.	.
TRINITY_DN103786_c0_g1	TRINITY_DN103786_c0_g1_i1	.	.	.	.	.	.	.	.	.	.	.	.	.	.
TRINITY_DN103713_c0_g1	TRINITY_DN103713_c0_g1_i1	PRU1_PRUAR^PRU1_PRUAR^Q:304-101,H:1-68^58.824%ID^E:1.21e-22^RecName: Full=Major allergen Pru ar 1;^Eukaryota; Viridiplantae; Streptophyta; Embryophyta; Tracheophyta; Spermatophyta; Magnoliophyta; eudicotyledons; Gunneridae; Pentapetalae; rosids; fabids; Rosales; Rosaceae; Maloideae; Amygdaleae; Prunus	.	.	.	.	.	.	.	.	.	GO:0006952^biological_process^defense response`GO:0009607^biological_process^response to biotic stimulus	.	.	.
TRINITY_DN103748_c0_g1	TRINITY_DN103748_c0_g1_i1	.	.	.	.	.	.	.	.	.	.	.	.	.	.
TRINITY_DN103777_c0_g1	TRINITY_DN103777_c0_g1_i1	.	.	.	.	.	.	.	.	.	.	.	.	.	.
TRINITY_DN103800_c0_g1	TRINITY_DN103800_c0_g1_i1	.	.	.	.	.	.	.	.	.	.	.	.	.	.
TRINITY_DN103750_c0_g1	TRINITY_DN103750_c0_g1_i1	GUFP_POPTR^GUFP_POPTR^Q:1-81,H:608-634^88.889%ID^E:6.78e-08^RecName: Full=Translation factor GUF1 homolog, chloroplastic {ECO:0000255|HAMAP-Rule:MF_03138};^Eukaryota; Viridiplantae; Streptophyta; Embryophyta; Tracheophyta; Spermatophyta; Magnoliophyta; eudicotyledons; Gunneridae; Pentapetalae; rosids; fabids; Malpighiales; Salicaceae; Saliceae; Populus	.	.	.	.	.	.	.	COG0481^Required for accurate and efficient protein synthesis under certain stress conditions. May act as a fidelity factor of the translation reaction, by catalyzing a one-codon backward translocation of tRNAs on improperly translocated ribosomes. Back- translocation proceeds from a post-translocation (POST) complex to a pre-translocation (PRE) complex, thus giving elongation factor G a second c…	KEGG:pop:POPTR_0001s31270g`KO:K21594	GO:0009507^cellular_component^chloroplast`GO:0005525^molecular_function^GTP binding`GO:0003924^molecular_function^GTPase activity`GO:0006412^biological_process^translation	.	.	.
TRINITY_DN103762_c0_g2	TRINITY_DN103762_c0_g2_i1	.	.	.	.	.	.	.	.	.	.	.	.	.	.
TRINITY_DN103732_c0_g1	TRINITY_DN103732_c0_g1_i1	.	.	TRINITY_DN103732_c0_g1_i1|m.385	410-102[-]	.	.	.	.	.	.	.	.	.	.
TRINITY_DN103712_c0_g1	TRINITY_DN103712_c0_g1_i1	ANXD1_ARATH^ANXD1_ARATH^Q:4-99,H:122-153^78.125%ID^E:3.92e-09^RecName: Full=Annexin D1;^Eukaryota; Viridiplantae; Streptophyta; Embryophyta; Tracheophyta; Spermatophyta; Magnoliophyta; eudicotyledons; Gunneridae; Pentapetalae; rosids; malvids; Brassicales; Brassicaceae; Camelineae; Arabidopsis	.	.	.	.	.	.	.	ENOG410XPUN^annexin A7	KEGG:ath:AT1G35720	GO:0048046^cellular_component^apoplast`GO:0005618^cellular_component^cell wall`GO:0009507^cellular_component^chloroplast`GO:0009570^cellular_component^chloroplast stroma`GO:0005829^cellular_component^cytosol`GO:0016020^cellular_component^membrane`GO:0005739^cellular_component^mitochondrion`GO:0005886^cellular_component^plasma membrane`GO:0009506^cellular_component^plasmodesma`GO:0009579^cellular_…	.	.	.
TRINITY_DN103792_c0_g1	TRINITY_DN103792_c0_g1_i1	SYGM1_ARATH^SYGM1_ARATH^Q:214-318,H:160-194^88.571%ID^E:3.3e-14^RecName: Full=Glycine--tRNA ligase, mitochondrial 1 {ECO:0000305};^Eukaryota; Viridiplantae; Streptophyta; Embryophyta; Tracheophyta; Spermatophyta; Magnoliophyta; eudicotyledons; Gunneridae; Pentapetalae; rosids; malvids; Brassicales; Brassicaceae; Camelineae; Arabidopsis	.	.	.	.	.	.	.	COG0423^Catalyzes the attachment of glycine to tRNA(Gly) (By similarity)	KEGG:ath:AT1G29880`KO:K01880	GO:0005829^cellular_component^cytosol`GO:0005768^cellular_component^endosome`GO:0005794^cellular_component^Golgi apparatus`GO:0005739^cellular_component^mitochondrion`GO:0005802^cellular_component^trans-Golgi network`GO:0005524^molecular_function^ATP binding`GO:0004820^molecular_function^glycine-tRNA ligase activity`GO:0046983^molecular_function^protein dimerization activity`GO:0015966^biological…	.	.	.
TRINITY_DN103729_c0_g1	TRINITY_DN103729_c0_g1_i1	.	.	.	.	.	.	.	.	.	.	.	.	.	.
TRINITY_DN103710_c0_g1	TRINITY_DN103710_c0_g1_i1	.	.	.	.	.	.	.	.	.	.	.	.	.	.
TRINITY_DN103718_c0_g1	TRINITY_DN103718_c0_g1_i1	PS10B_ARATH^PS10B_ARATH^Q:287-358,H:75-98^95.833%ID^E:2.09e-07^RecName: Full=26S proteasome regulatory subunit S10B homolog B;^Eukaryota; Viridiplantae; Streptophyta; Embryophyta; Tracheophyta; Spermatophyta; Magnoliophyta; eudicotyledons; Gunneridae; Pentapetalae; rosids; malvids; Brassicales; Brassicaceae; Camelineae; Arabidopsis`PS10B_ARATH^PS10B_ARATH^Q:2-73,H:51-74^100%ID^E:4.16e-07^RecName:…	.	.	.	.	.	.	.	COG1222^26S protease regulatory subunit	KEGG:ath:AT1G45000`KO:K03064	GO:0005618^cellular_component^cell wall`GO:0031597^cellular_component^cytosolic proteasome complex`GO:0016020^cellular_component^membrane`GO:0031595^cellular_component^nuclear proteasome complex`GO:0005730^cellular_component^nucleolus`GO:0005886^cellular_component^plasma membrane`GO:0009506^cellular_component^plasmodesma`GO:0000502^cellular_component^proteasome complex`GO:0008540^cellular_compone…	.	.	.
TRINITY_DN103758_c0_g1	TRINITY_DN103758_c0_g1_i1	PBL11_ARATH^PBL11_ARATH^Q:1-84,H:96-123^71.429%ID^E:3.04e-07^RecName: Full=Probable serine/threonine-protein kinase PBL11 {ECO:0000305};^Eukaryota; Viridiplantae; Streptophyta; Embryophyta; Tracheophyta; Spermatophyta; Magnoliophyta; eudicotyledons; Gunneridae; Pentapetalae; rosids; malvids; Brassicales; Brassicaceae; Camelineae; Arabidopsis	.	.	.	.	.	.	.	COG0515^Serine Threonine protein kinase	KEGG:ath:AT5G02290	GO:0005886^cellular_component^plasma membrane`GO:0005524^molecular_function^ATP binding`GO:0004675^molecular_function^transmembrane receptor protein serine/threonine kinase activity`GO:0007166^biological_process^cell surface receptor signaling pathway`GO:0006952^biological_process^defense response`GO:0006468^biological_process^protein phosphorylation	.	.	.
TRINITY_DN103757_c0_g1	TRINITY_DN103757_c0_g1_i1	.	.	.	.	.	.	.	.	.	.	.	.	.	.
TRINITY_DN103783_c0_g1	TRINITY_DN103783_c0_g1_i1	HGT1_CANAX^HGT1_CANAX^Q:3-485,H:239-401^42.683%ID^E:9.07e-30^RecName: Full=High-affinity glucose transporter;^Eukaryota; Fungi; Dikarya; Ascomycota; Saccharomycotina; Saccharomycetes; Saccharomycetales; Debaryomycetaceae; Candida/Lodderomyces clade; Candida	.	TRINITY_DN103783_c0_g1_i1|m.386	3-485[+]	HGT1_CANAX^HGT1_CANAX^Q:1-161,H:239-401^42.683%ID^E:1.94e-33^RecName: Full=High-affinity glucose transporter;^Eukaryota; Fungi; Dikarya; Ascomycota; Saccharomycotina; Saccharomycetes; Saccharomycetales; Debaryomycetaceae; Candida/Lodderomyces clade; Candida	PF00083.23^Sugar_tr^Sugar (and other) transporter^12-134^E:2.9e-21	.	ExpAA=62.18^PredHel=3^Topology=i53-72o82-99i108-130o	.	.	GO:0016021^cellular_component^integral component of membrane`GO:0005886^cellular_component^plasma membrane`GO:0005355^molecular_function^glucose transmembrane transporter activity`GO:0035690^biological_process^cellular response to drug`GO:0034605^biological_process^cellular response to heat`GO:0036244^biological_process^cellular response to neutral pH`GO:0030447^biological_process^filamentous gro…	GO:0022857^molecular_function^transmembrane transporter activity`GO:0055085^biological_process^transmembrane transport`GO:0016021^cellular_component^integral component of membrane	.	.
TRINITY_DN127174_c0_g1	TRINITY_DN127174_c0_g1_i1	SPD2_DATST^SPD2_DATST^Q:117-473,H:191-309^60.504%ID^E:1.34e-45^RecName: Full=Spermidine synthase 2;^Eukaryota; Viridiplantae; Streptophyta; Embryophyta; Tracheophyta; Spermatophyta; Magnoliophyta; eudicotyledons; Gunneridae; Pentapetalae; asterids; lamiids; Solanales; Solanaceae; Solanoideae; Datureae; Datura	.	TRINITY_DN127174_c0_g1_i1|m.387	3-482[+]	SPD2_DATST^SPD2_DATST^Q:39-157,H:191-309^60.504%ID^E:7.09e-47^RecName: Full=Spermidine synthase 2;^Eukaryota; Viridiplantae; Streptophyta; Embryophyta; Tracheophyta; Spermatophyta; Magnoliophyta; eudicotyledons; Gunneridae; Pentapetalae; asterids; lamiids; Solanales; Solanaceae; Solanoideae; Datureae; Datura	PF01564.16^Spermine_synth^Spermine/spermidine synthase domain^46-120^E:4.4e-12	.	.	.	.	GO:0004766^molecular_function^spermidine synthase activity`GO:0008295^biological_process^spermidine biosynthetic process	.	.	.
TRINITY_DN127139_c0_g1	TRINITY_DN127139_c0_g1_i1	.	.	.	.	.	.	.	.	.	.	.	.	.	.
TRINITY_DN127126_c0_g1	TRINITY_DN127126_c0_g1_i1	.	.	.	.	.	.	.	.	.	.	.	.	.	.
TRINITY_DN127134_c0_g1	TRINITY_DN127134_c0_g1_i1	.	.	.	.	.	.	.	.	.	.	.	.	.	.
TRINITY_DN127130_c0_g1	TRINITY_DN127130_c0_g1_i1	.	.	.	.	.	.	.	.	.	.	.	.	.	.
TRINITY_DN127199_c0_g1	TRINITY_DN127199_c0_g1_i1	.	.	TRINITY_DN127199_c0_g1_i1|m.388	3-329[+]	.	.	.	.	.	.	.	.	.	.
TRINITY_DN127137_c0_g1	TRINITY_DN127137_c0_g1_i1	.	.	TRINITY_DN127137_c0_g1_i1|m.389	3-404[+]	.	.	sigP:1^16^0.788^YES	.	.	.	.	.	.	.
TRINITY_DN127104_c0_g1	TRINITY_DN127104_c0_g1_i1	.	.	.	.	.	.	.	.	.	.	.	.	.	.
TRINITY_DN127190_c0_g1	TRINITY_DN127190_c0_g1_i1	.	.	.	.	.	.	.	.	.	.	.	.	.	.
TRINITY_DN127196_c0_g1	TRINITY_DN127196_c0_g1_i1	.	.	.	.	.	.	.	.	.	.	.	.	.	.
TRINITY_DN127186_c0_g1	TRINITY_DN127186_c0_g1_i1	.	.	.	.	.	.	.	.	.	.	.	.	.	.
TRINITY_DN127188_c0_g1	TRINITY_DN127188_c0_g1_i1	.	.	.	.	.	.	.	.	.	.	.	.	.	.
TRINITY_DN127195_c0_g1	TRINITY_DN127195_c0_g1_i1	.	.	.	.	.	.	.	.	.	.	.	.	.	.
TRINITY_DN127112_c0_g1	TRINITY_DN127112_c0_g1_i1	.	.	TRINITY_DN127112_c0_g1_i1|m.390	1-531[+]	.	.	.	.	.	.	.	.	.	.
TRINITY_DN127112_c0_g1	TRINITY_DN127112_c0_g1_i1	.	.	TRINITY_DN127112_c0_g1_i1|m.391	530-135[-]	.	.	sigP:1^27^0.543^YES	ExpAA=17.50^PredHel=1^Topology=i7-26o	.	.	.	.	.	.
TRINITY_DN127108_c0_g1	TRINITY_DN127108_c0_g1_i1	.	.	.	.	.	.	.	.	.	.	.	.	.	.
TRINITY_DN127168_c0_g1	TRINITY_DN127168_c0_g1_i1	SLP1_ARATH^SLP1_ARATH^Q:355-471,H:129-167^79.487%ID^E:8.71e-14^RecName: Full=Shewanella-like protein phosphatase 1 {ECO:0000303|PubMed:21976480};^Eukaryota; Viridiplantae; Streptophyta; Embryophyta; Tracheophyta; Spermatophyta; Magnoliophyta; eudicotyledons; Gunneridae; Pentapetalae; rosids; malvids; Brassicales; Brassicaceae; Camelineae; Arabidopsis`SLP1_ARATH^SLP1_ARATH^Q:1-93,H:104-134^90.323%…	.	TRINITY_DN127168_c0_g1_i1|m.392	1-369[+]	SLP1_ARATH^SLP1_ARATH^Q:1-31,H:104-134^90.323%ID^E:4.68e-10^RecName: Full=Shewanella-like protein phosphatase 1 {ECO:0000303|PubMed:21976480};^Eukaryota; Viridiplantae; Streptophyta; Embryophyta; Tracheophyta; Spermatophyta; Magnoliophyta; eudicotyledons; Gunneridae; Pentapetalae; rosids; malvids; Brassicales; Brassicaceae; Camelineae; Arabidopsis	.	.	.	ENOG4110KW0^NA	KEGG:ath:AT1G07010	GO:0009507^cellular_component^chloroplast`GO:0030145^molecular_function^manganese ion binding`GO:0016791^molecular_function^phosphatase activity`GO:0004721^molecular_function^phosphoprotein phosphatase activity	.	.	.
TRINITY_DN127194_c0_g1	TRINITY_DN127194_c0_g1_i1	.	.	.	.	.	.	.	.	.	.	.	.	.	.
TRINITY_DN127117_c0_g1	TRINITY_DN127117_c0_g1_i1	.	.	.	.	.	.	.	.	.	.	.	.	.	.
TRINITY_DN127180_c0_g1	TRINITY_DN127180_c0_g1_i1	LEA14_GOSHI^LEA14_GOSHI^Q:1-81,H:43-69^70.37%ID^E:1.41e-06^RecName: Full=Late embryogenesis abundant protein Lea14-A;^Eukaryota; Viridiplantae; Streptophyta; Embryophyta; Tracheophyta; Spermatophyta; Magnoliophyta; eudicotyledons; Gunneridae; Pentapetalae; rosids; malvids; Malvales; Malvaceae; Malvoideae; Gossypium	.	.	.	.	.	.	.	.	KEGG:ghi:107922715	GO:0009269^biological_process^response to desiccation	.	.	.
TRINITY_DN127148_c0_g1	TRINITY_DN127148_c0_g1_i1	.	.	.	.	.	.	.	.	.	.	.	.	.	.
TRINITY_DN127170_c0_g1	TRINITY_DN127170_c0_g1_i1	.	.	.	.	.	.	.	.	.	.	.	.	.	.
TRINITY_DN127111_c0_g1	TRINITY_DN127111_c0_g1_i1	MCE1_CAEEL^MCE1_CAEEL^Q:4-354,H:99-214^37.288%ID^E:1.72e-19^RecName: Full=mRNA-capping enzyme;^Eukaryota; Metazoa; Ecdysozoa; Nematoda; Chromadorea; Rhabditida; Rhabditoidea; Rhabditidae; Peloderinae; Caenorhabditis	.	TRINITY_DN127111_c0_g1_i1|m.393	1-474[+]	MCE1_CAEEL^MCE1_CAEEL^Q:2-118,H:99-214^37.288%ID^E:1.55e-19^RecName: Full=mRNA-capping enzyme;^Eukaryota; Metazoa; Ecdysozoa; Nematoda; Chromadorea; Rhabditida; Rhabditoidea; Rhabditidae; Peloderinae; Caenorhabditis	PF00782.19^DSPc^Dual specificity phosphatase, catalytic domain^14-91^E:1.8e-13`PF00102.26^Y_phosphatase^Protein-tyrosine phosphatase^15-76^E:8.7e-05	.	.	COG5226^Second step of mRNA capping. Transfer of the GMP moiety of GTP to the 5'-end of RNA via an enzyme-GMP covalent reaction intermediate (By similarity)	KEGG:cel:CELE_C03D6.3`KO:K13917	GO:0005622^cellular_component^intracellular`GO:0005634^cellular_component^nucleus`GO:0005525^molecular_function^GTP binding`GO:0004484^molecular_function^mRNA guanylyltransferase activity`GO:0004651^molecular_function^polynucleotide 5'-phosphatase activity`GO:0004725^molecular_function^protein tyrosine phosphatase activity`GO:0008138^molecular_function^protein tyrosine/serine/threonine phosphatas…	GO:0008138^molecular_function^protein tyrosine/serine/threonine phosphatase activity`GO:0016311^biological_process^dephosphorylation`GO:0004725^molecular_function^protein tyrosine phosphatase activity`GO:0006470^biological_process^protein dephosphorylation	.	.
TRINITY_DN127182_c0_g1	TRINITY_DN127182_c0_g1_i1	.	.	.	.	.	.	.	.	.	.	.	.	.	.
TRINITY_DN127187_c0_g1	TRINITY_DN127187_c0_g1_i1	.	.	.	.	.	.	.	.	.	.	.	.	.	.
TRINITY_DN127115_c0_g1	TRINITY_DN127115_c0_g1_i1	KN5A_ORYSJ^KN5A_ORYSJ^Q:116-352,H:317-394^86.076%ID^E:5.13e-37^RecName: Full=Kinesin-like protein KIN-5A {ECO:0000305};^Eukaryota; Viridiplantae; Streptophyta; Embryophyta; Tracheophyta; Spermatophyta; Magnoliophyta; Liliopsida; Poales; Poaceae; BOP clade; Oryzoideae; Oryzeae; Oryzinae; Oryza; Oryza sativa	.	.	.	.	.	.	.	COG5059^Kinesin family member	KEGG:osa:9268593`KO:K10398	GO:0005737^cellular_component^cytoplasm`GO:0005871^cellular_component^kinesin complex`GO:0005874^cellular_component^microtubule`GO:0005819^cellular_component^spindle`GO:0005524^molecular_function^ATP binding`GO:0008574^molecular_function^ATP-dependent microtubule motor activity, plus-end-directed`GO:0008017^molecular_function^microtubule binding`GO:0007018^biological_process^microtubule-based mov…	.	.	.
TRINITY_DN127154_c0_g1	TRINITY_DN127154_c0_g1_i1	.	.	.	.	.	.	.	.	.	.	.	.	.	.
TRINITY_DN127200_c0_g1	TRINITY_DN127200_c0_g1_i1	MTM1_ARATH^MTM1_ARATH^Q:2-175,H:358-413^75.862%ID^E:1.56e-20^RecName: Full=Mitochondrial carrier protein MTM1;^Eukaryota; Viridiplantae; Streptophyta; Embryophyta; Tracheophyta; Spermatophyta; Magnoliophyta; eudicotyledons; Gunneridae; Pentapetalae; rosids; malvids; Brassicales; Brassicaceae; Camelineae; Arabidopsis	.	.	.	.	.	.	.	ENOG410XQVP^Solute carrier family 25 member	KEGG:ath:AT4G27940`KO:K15119	GO:0016021^cellular_component^integral component of membrane`GO:0005743^cellular_component^mitochondrial inner membrane`GO:0005739^cellular_component^mitochondrion`GO:0016530^molecular_function^metallochaperone activity`GO:0022857^molecular_function^transmembrane transporter activity`GO:0005215^molecular_function^transporter activity`GO:0006828^biological_process^manganese ion transport`GO:000683…	.	.	.
[truncated: 175,567 more rows]

## Sheet: Table_S8_Top_BlastX_hit
Table_S8_Swiss-prot top BLASTX hit.
HIP1_ORYSJ	Q:5-145,H:615-661	59574%ID	E:172e-16	RecName: Full=Probable E3 ubiquitin-protein ligase HIP1;	Eukaryota; Viridiplantae; Streptophyta; Embryophyta; Tracheophyta; Spermatophyta; Magnoliophyta; Liliopsida; Poales; Poaceae; BOP clade; Oryzoideae; Oryzeae; Oryzinae; Oryza; Oryza sativa
[truncated: 106,714 more rows]
[truncated: 124 more columns]

## Sheet: Table_S9_Top_BlastP_hit
Table_S9_Swiss-prot top BLASTP hit.
[truncated: 56,725 more rows]
[truncated: 76 more columns]

## Sheet: Table_S10_GO_BP_blastX
Table_S10_Distribution of gene ontology (GO) terms among biological process category using result of BlastX and DAVID.
[truncated: 437 more rows]

[truncated: 23 more sheets: Table_S11_GO_MF_blastX, Table_S12_GO_CC_blastX, Table_S13_GO_BP_blastP, Table_S14_GO_MF_blastP, Table_S15_GO_CC_blastP, Table_S16_KEGG_blastx, Table_S17_KEGG_blastP, S18_diffExpr.P0.001_matrix.log2, S19_Upregulated, S20_Down_regulated, S21_GO_for DET, S22_GO_BP_Up, S23_GO_MF_Up, S24_GO_CC_Up, S25_GO_BP_Dn, S26_GO_MF_Dn, S27_GO_CC_Dn, S28_UpRegsKEGG, S29_DownRegsKEGG, S30_genes …]
